# Supplementary material for: Antioxidant Metabolism Underlies Different Metabolic Strategies for Primary Root Growth Maintenance under Water Stress in Cotton and Maize
Source: MDPI journal article supplement (doi:10.3390/antiox11050820), 2022-04-22
Supplement: s1 [file s1]

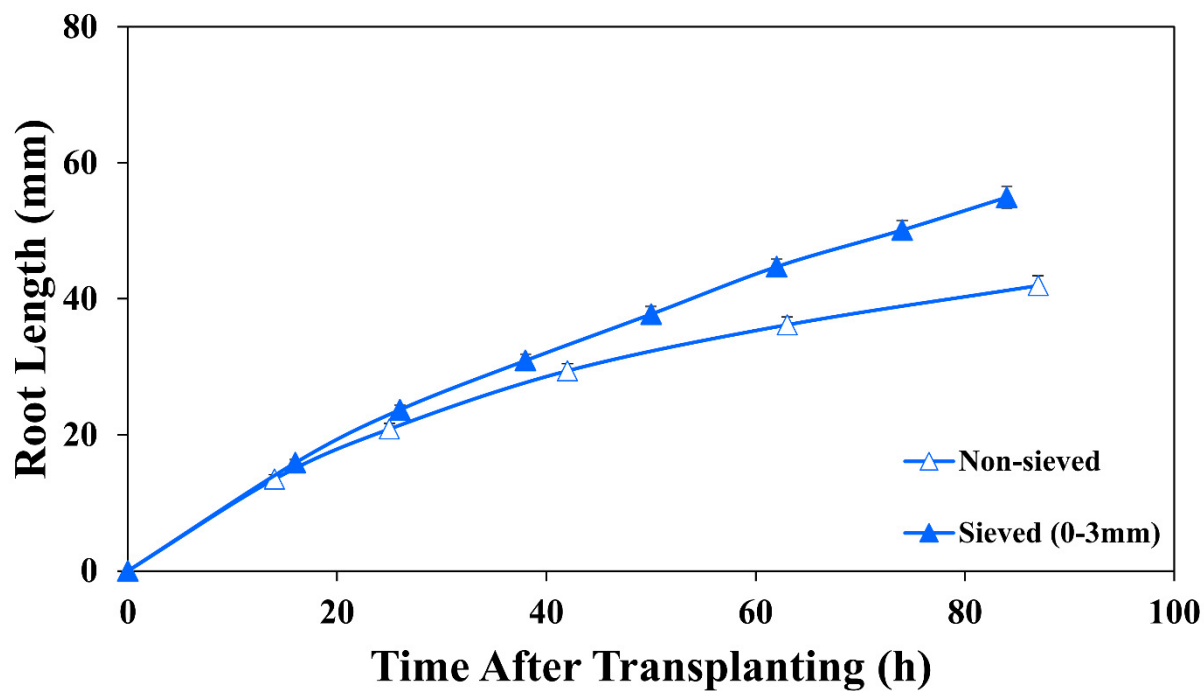

**Figure S1.** Time course of primary root length for cotton (cv. AU90810) seedlings after transplanting to vermiculite at a water potential of  $-1.6$  MPa. The vermiculite was either non-sieved or sieved to a particle size of 3 mm or less to enhance the hydraulic contact between the roots and the vermiculite particles. Data are means  $\pm$  SE ( $n = 29-38$ ).
