# Supplementary material for: Antioxidant Metabolism Underlies Different Metabolic Strategies for Primary Root Growth Maintenance under Water Stress in Cotton and Maize
Source: MDPI journal article supplement (doi:10.3390/antiox11050820), 2022-04-22
Supplement: s1 [file s1]

**Table S3.** Ratios of metabolite abundance in R2 of the elongation zone between water-stressed and well-watered primary roots of cotton and maize.

| Sub Pathway                                     | Metabolite                    | Cotton<br>Region 2 | Maize<br>Region 2 |
|-------------------------------------------------|-------------------------------|--------------------|-------------------|
| Amines and polyamines                           | 5-methylthioadenosine (MTA)   | 0.57 / 0.63        | NS                |
|                                                 | N-acetylputrescine            | 0.55 / 0.4         | NS                |
|                                                 | agmatine                      | 0.17 / 0.11        | NS                |
|                                                 | spermidine                    | 0.09 / 0.07        | NS                |
|                                                 | putrescine                    | 0.03 / 0.02        | NS                |
|                                                 | nicotianamine                 | NS                 | 0.36 / 0.56       |
| Aromatic amino acid<br>metabolism (PEP derived) | 3-(4-hydroxyphenyl)lactate    | 6.42 / 4.16        | 0.51 / 0.44       |
|                                                 | tryptamine                    | 3.89 / 1.95        | NS                |
|                                                 | tyramine                      | 3.36 / 1.85        | NS                |
|                                                 | tryptophan                    | 1.81 / 1.34        | NS                |
|                                                 | quinat                        | 0.49 / 0.54        | 2.02 / 2.31       |
|                                                 | phenylalanine                 | 0.47 / 0.37        | 0.78 / 0.53       |
|                                                 | phenylpyruvate                | 0.29 / 0.28        | 0.17 / 0.29       |
|                                                 | N-acetylphenylalanine         | 0.51 / 0.55        | 0.30 / 0.38       |
|                                                 | tyrosine                      | NS                 | 0.62 / 0.38       |
|                                                 | 4-hydroxyphenylpyruvate       | NS                 | 0.25 / 0.17       |
|                                                 | N-methylphenylalanine         |                    | 10.73 / 7.04      |
|                                                 | O-methyl tyrosine             |                    | 0.58 / 0.66       |
| Aspartate family<br>(OAA derived)               | N-methylpipercolate           | 4.62 / 4.72        | NS                |
|                                                 | 2-hydroxyadipate              | 2.22 / 2.63        | NS                |
|                                                 | N-acetyl-β-alanine            | 2.17 / 2.65        | NS                |
|                                                 | lysine                        | 1.85 / 1.25        | NS                |
|                                                 | 6-oxopiperidine-2-carboxylate | 2.7 / 1.77         | 2.72 / 2.6        |
|                                                 | alanine                       | 0.77 / 0.45        | NS                |
|                                                 | N-acetylasparagine            | 0.54 / 0.63        | 0.16 / 0.24       |
|                                                 | N-acetylmethionine            | 0.53 / 0.56        | NS                |
|                                                 | N-formylmethionine            | 0.5 / 0.7          | 0.11 / 0.17       |
|                                                 | S-adenosylmethionine (SAM)    | 0.47 / 0.46        | 1.57 / 1.65       |
|                                                 | S-adenosylhomocysteine (SAH)  | 0.29 / 0.45        | NS                |
|                                                 | aspartate                     | 0.54 / 0.7         | NS                |
|                                                 | asparagine                    | NS                 | 2.41 / 1.77       |
|                                                 | homoserine                    | NS                 | 0.73 / 0.63       |
|                                                 | homoserine lactone            | NS                 | 0.7 / 0.41        |
|                                                 | methionine                    | NS                 | 0.37 / 0.26       |
|                                                 | N-acetylaspartate (NAA)       | NS                 | 0.32 / 0.43       |
|                                                 | methionine sulfoxide          | NS                 | 0.28 / 0.23       |
|                                                 | 2-piperidinone                |                    | 1.23 / 1.22       |

|                                               |                                |             |             |
|-----------------------------------------------|--------------------------------|-------------|-------------|
| Branched Chain Amino Acids (pyruvate derived) | methysuccinate                 | 2.15 / 1.62 | NS          |
|                                               | α-hydroxyisovalerate           | 1.56 / 2.32 | NS          |
|                                               | 3-methyl-2-oxobutyrate         | 0.52 / 0.8  | 1.98 / 2.05 |
|                                               | 3-methyl-2-oxovalerate         | 0.48 / 0.78 | NS          |
|                                               | 4-methyl-2-oxopentanoate       | 0.48 / 0.69 | NS          |
|                                               | 2-isopropylmalate              | 0.3 / 0.4   | NS          |
|                                               | 2,3-dihydroxyisovalerate       | 0.19 / 0.18 | 0.32 / 0.24 |
|                                               | leucine                        | NS          | 0.57 / 0.39 |
|                                               | N-acetylleucine                | NS          | 0.36 / 0.45 |
|                                               | N-methylleucine                |             | 4.62 / 3.4  |
|                                               | norvaline                      |             | 0.47 / 0.57 |
|                                               |                                |             |             |
| BCAA-isoleucine catabolism                    | 2-methylglutarate              | 1.65 / 1.74 | NS          |
|                                               |                                |             |             |
| Glutamate family (α-ketoglutarate derived)    | 1-methylhistidine              | 4.6 / 3.76  | NS          |
|                                               | pyroglutamine                  | 7.8 / 6.65  | NS          |
|                                               | N-acetylproline                | 3.97 / 6.12 | NS          |
|                                               | stachydrine                    | 3.53 / 3.57 | NS          |
|                                               | homocitrulline                 | 2.44 / 2.49 | NS          |
|                                               | 3-methylhistidine              | 1.72 / 1.82 | NS          |
|                                               | carboxyethyl-GABA              | 1.51 / 1.77 | NS          |
|                                               | N-monomethylarginine           | 0.58 / 0.43 | NS          |
|                                               | arginine                       | 0.56 / 0.38 | NS          |
|                                               | N-acetylarginine               | 0.4 / 0.51  | NS          |
|                                               | N-acetylglutamine              | 0.32 / 0.39 | 0.17 / 0.45 |
|                                               | trans-4-hydroxyproline         | NS          | 2.21 / 2.26 |
|                                               | N-methylglutamate              | NS          | 1.43 / 1.6  |
|                                               | dimethylarginine (SDMA + ADMA) | NS          | 0.53 / 0.58 |
|                                               | 2-pyrrolidinone                |             | 4.73 / 8.51 |
|                                               | 1,3-diaminopropane             |             | 0.35 / 0.49 |
|                                               | 4-hydroxy-2-oxoglutaric acid   |             | 0.27 / 0.61 |
|                                               |                                |             |             |
| Glutathione metabolism                        | γ-glutamyltyrosine             | 1.95 / 3.48 | NS          |
|                                               | γ-glutamyltryptophan           | 1.91 / 2.44 | 4.43 / 5.53 |
|                                               | γ-glutamylleucine              | 1.32 / 1.53 | NS          |
|                                               | cysteine-glutathione disulfide | 0.51 / 0.35 | NS          |
|                                               | glutathione, oxidized (GSSG)   | 0.49 / 0.47 | NS          |
|                                               | glutathione, reduced (GSH)     | 0.38 / 0.49 | NS          |
|                                               | γ-glutamylglutamine            | 0.2 / 0.41  | NS          |
|                                               | γ-glutamylalanine              | NS          | 2.98 / 3.85 |
|                                               | γ-glutamylthreonine            | NS          | 2.22 / 3.28 |
|                                               | γ-glutamylphenylalanine        | NS          | 1.46 / 1.86 |
|                                               |                                |             |             |
| betaine                                       |                                | 2.85 / 2.59 | NS          |

|                                           |                                             |               |             |
|-------------------------------------------|---------------------------------------------|---------------|-------------|
| Serine family (phospho-glycerate derived) | sulfate                                     | 0.65 / 0.44   | 1.22 / 1.14 |
|                                           | glycine                                     | 0.5 / 0.3     | NS          |
|                                           | <i>N</i> -acetylserine                      | 0.35 / 0.45   | NS          |
|                                           | <i>N</i> -acetyltaurine                     | NS            | 2.32 / 2.61 |
|                                           | serine                                      | NS            | 2.12 / 1.52 |
|                                           | homocysteine                                |               | 0.16 / 0.13 |
|                                           | O-acetylserine                              |               | 0.14 / 0.16 |
| Amino sugar and nucleotide sugar          | arabonate                                   | 1.44 / 1.4    | NS          |
|                                           | xylose                                      | 0.72 / 0.55   | NS          |
|                                           | ribose                                      | 0.53 / 0.51   | NS          |
|                                           | UDP-galactose                               | 0.47 / 0.23   | NS          |
|                                           | UDP- <i>N</i> -acetylglucosamine            | 0.37 / 0.67   | NS          |
|                                           | UDP- <i>N</i> -acetylgalactosamine          | 0.55 / 0.71   | NS          |
|                                           | ribonate                                    | NS            | 0.44 / 0.49 |
|                                           | xylitol                                     |               | 0.63 / 0.65 |
|                                           | xylulose                                    |               | 0.51 / 0.65 |
|                                           | ribulose/xylulose 5-phosphate               |               | 0.31 / 0.45 |
|                                           | maltol                                      |               | 0.25 / 0.59 |
| C5 branched dibasic acid metabolism       | itaconate (methylenesuccinate)              |               | 0.35 / 0.42 |
| Calvin cycle and pentose phosphate        | ribose 5-phosphate                          |               | 0.34 / 0.54 |
|                                           | ribose 1-phosphate                          |               | 0.27 / 0.41 |
| Glycolysis                                | glucuronate                                 | 0.53 / 0.5    | 0.71 / 0.62 |
|                                           | pyruvate                                    | NS            | 0.5 / 0.7   |
|                                           | fructose-6-phosphate                        | NS            | 0.22 / 0.2  |
| Photorespiration                          | oxalate (ethanedioate)                      | 0.78 / 0.77   | NS          |
| Sucrose, glucose, fructose metabolism     | galactinol                                  | 17.49 / 18.17 |             |
|                                           | methyl glucopyranoside ( $\alpha + \beta$ ) | 2.64 / 2.41   | NS          |
|                                           | 3-deoxyoctulosonate                         | 0.52 / 0.5    | NS          |
|                                           | maltose                                     | 0.48 / 0.57   | NS          |
|                                           | mannose-6-phosphate                         | NS            | 0.44 / 0.47 |
|                                           | 1-kestose                                   |               | 5.55 / 5.37 |
|                                           | sucrose-6-phosphate                         |               | 1.92 / 1.92 |
| TCA cycle                                 | succinate                                   | 0.6 / 0.52    | NS          |
|                                           | fumarate                                    | 0.6 / 0.52    | NS          |
|                                           | malate                                      | 0.52 / 0.48   | NS          |
|                                           | maleate                                     | 0.34 / 0.39   | NS          |
|                                           | $\alpha$ -ketoglutarate                     | NS            | 2.27 / 2.89 |
|                                           | 2-methylcitrate                             | NS            | 5.02 / 4.43 |

|                                        |                                          |             |             |
|----------------------------------------|------------------------------------------|-------------|-------------|
|                                        | aconitate                                | NS          | 0.74 / 0.84 |
|                                        | citrate                                  | NS          | 0.4 / 0.53  |
|                                        | mesaconate (methylfumarate)              |             | 0.73 / 0.69 |
|                                        |                                          |             |             |
| Ascorbate metabolism                   | gulonate                                 | NS          | 0.48 / 0.47 |
|                                        |                                          |             |             |
| Carnitine metabolism                   | deoxycarnitine                           | 7.37 / 5.38 | NS          |
|                                        |                                          |             |             |
| Nicotinate and nicotinamide metabolism | trigonelline (N'-methylnicotinate)       | 2.99 / 2.65 | NS          |
|                                        | nicotinate ribonucleoside                | 0.65 / 0.65 | NS          |
|                                        | nicotinate                               | 0.55 / 0.44 | 1.85 / 2.33 |
|                                        | nicotinamide adenine dinucleotide (NAD+) | 0.39 / 0.48 | NS          |
|                                        | nicotinamide riboside                    | NS          | 0.43 / 0.35 |
|                                        |                                          |             |             |
| Oxidative phosphorylation              | acetylphosphate                          | NS          | 0.4 / 0.37  |
|                                        |                                          |             |             |
| Riboflavin and FAD metabolism          | flavin adenine dinucleotide (FAD)        | 0.43 / 0.55 | NS          |
|                                        | flavin mononucleotide (FMN)              | 0.49 / 0.57 | NS          |
|                                        |                                          |             |             |
| Thiamine metabolism                    | thiamin (Vitamin B1)                     | 0.61 / 0.52 | 2.17 / 2.41 |
|                                        |                                          |             |             |
| Tocopherol metabolism                  | α-tocopherol                             | 0.5 / 0.52  | NS          |
|                                        |                                          |             |             |
| Vitamin B metabolism (B6 or B12)       | pyridoxate                               | 2.51 / 1.88 | NS          |
|                                        | pyridoxal                                | 0.37 / 0.46 | NS          |
|                                        |                                          |             |             |
| Auxin metabolism                       | indoleacetate                            | 0.59 / 0.41 | NS          |
|                                        | 2-oxindole-3-acetate                     | NS          | 0.58 / 0.55 |
|                                        |                                          |             |             |
| Fatty acid, Amino                      | 2-aminoheptanoate                        | 3.32 / 2.85 | NS          |
|                                        |                                          |             |             |
| Fatty acid, Dicarboxylate              | pimelate (heptanedioate)                 | 4.60 / 5.19 | NS          |
|                                        | malonate                                 | 1.98 / 1.56 | NS          |
|                                        | azelate (nonanedioate)                   | 0.53 / 0.76 | 2.24 / 2.44 |
|                                        | adipate                                  | NS          | 0.6 / 0.79  |
|                                        | dodecanedioate                           |             | 0.2 / 0.33  |
|                                        |                                          |             |             |
| Free fatty acid                        | 2-hydroxyglutarate                       | 0.52 / 0.52 | NS          |
|                                        | 3-hydroxybutyrate (BHBA)                 | 0.37 / 0.49 | NS          |
|                                        | linolenate [α or γ; (18:3n3 or 6)]       | 0.11 / 0.16 | NS          |
|                                        | linoleate (18:2n6)                       | 0.1 / 0.14  | NS          |
|                                        | oleate (18:1n9)                          |             | 0.45 / 0.71 |
|                                        |                                          |             |             |
| Phospholipids                          | glycerophosphoethanolamine               | 1.67 / 2.08 | 15.74 / 8.8 |
|                                        | glycerophosphoinositol                   | 1.35 / 2.36 | 3.77 / 3.92 |

|                   |                                         |             |             |
|-------------------|-----------------------------------------|-------------|-------------|
|                   | choline                                 | 0.73 / 0.77 | NS          |
|                   | 1-palmitoyl-GPA (16:0)                  | 0.42 / 0.47 | NS          |
|                   | ethanolamine                            | 0.42 / 0.45 | NS          |
|                   | 1-oleoyl-GPA (18:1)                     | 0.25 / 0.33 | NS          |
|                   | 1-palmitoyl-2-oleoyl-GPE (16:0/18:1)    | 0.25 / 0.46 | NS          |
|                   | 1-oleoyl-GPE (18:1)                     | 0.21 / 0.38 | NS          |
|                   | 1-oleoyl-GPC (18:1)                     | 0.18 / 0.42 | NS          |
|                   | 1-palmitoyl-GPI (16:0)                  | 0.39 / 0.49 | 2.61 / 3    |
|                   | 1-palmitoyl-2-linoleoyl-GPE (16:0/18:2) | 0.38 / 0.56 | NS          |
|                   | 1-palmitoyl-GPG (16:0)                  | 0.25 / 0.51 | 1.80 / 4.05 |
|                   | glycerophosphoglycerol                  | NS          | 8.08 / 6.62 |
|                   | glycerol 3-phosphate                    | NS          | 2.16 / 2.45 |
|                   |                                         |             |             |
| Sphingolipid      | phytosphingosine                        | 0.43 / 0.54 | NS          |
|                   | sphingosine                             | 0.24 / 0.46 | NS          |
|                   | sphinganine                             | 0.22 / 0.38 | 0.1 / 0.13  |
| Sterols           | 3-hydroxy-3-methylglutarate             | NS          | 0.52 / 0.58 |
|                   | stigmasterol                            | NS          | 0.45 / 0.52 |
|                   | campesterol                             | NS          | 0.5 / 0.65  |
|                   | fucosterol                              | NS          | 0.3 / 0.38  |
|                   | ergosterol                              |             | 1.29 / 1.29 |
| Purine metabolism | adenosine 3'-monophosphate (3'-AMP)     | 9.08 / 6.86 | NS          |
|                   | guanosine 3'-monophosphate (3'-GMP)     | 6.57 / 2.48 | 0.15 / 0.07 |
|                   | adenosine-2',3'-cyclic monophosphate    | 2.90 / 3.28 | 0.52 / 0.24 |
|                   | allantoin                               | 0.66 / 0.53 | 1.88 / 1.17 |
|                   | N2,N2-dimethylguanosine                 | 0.6 / 0.56  | 1.73 / 4    |
|                   | 7-methylguanosine                       | 0.56 / 0.36 | NS          |
|                   | inosine                                 | 0.44 / 0.4  | 0.19 / 0.58 |
|                   | adenosine 5'-monophosphate (AMP)        | 0.43 / 0.57 | NS          |
|                   | allantoic acid                          | 0.42 / 0.32 | 0.17 / 0.2  |
|                   | guanosine 5'- monophosphate (5'-GMP)    | 0.38 / 0.51 | NS          |
|                   | guanosine                               | 0.32 / 0.42 | NS          |
|                   | adenine                                 | 0.26 / 0.29 | NS          |
|                   | inosine 5'-monophosphate (IMP)          | 0.23 / 0.49 | NS          |
|                   | 2'-deoxyguanosine                       | 0.20 / 0.48 | NS          |
|                   | 2'-deoxyadenosine                       | 0.18 / 0.35 | NS          |
|                   | 2'-deoxyadenosine 5'-monophosphate      | 0.11 / 0.37 | NS          |
|                   | hypoxanthine                            | 0.6 / 0.39  | NS          |
|                   | adenosine 2'-monophosphate (2'-AMP)     | NS          | 0.55 / 0.51 |
|                   | guanosine-2',3'-cyclic monophosphate    | NS          | 0.55 / 0.27 |
|                   | xanthine                                | NS          | 0.28 / 0.25 |
|                   | urate                                   | NS          | 0.41 / 0.35 |
|                   | guanosine 2'-monophosphate (2'-GMP)     |             | 0.75 / 0.72 |

|                                  |                                         |             |               |
|----------------------------------|-----------------------------------------|-------------|---------------|
| Pyrimidine metabolism            | cytidine 2',3'-cyclic monophosphate     | 2.90 / 2.06 | 0.67 / 0.44   |
|                                  | uridine-2',3'-cyclic monophosphate      | 1.91 / 2.02 | 0.59 / 0.39   |
|                                  | uridine 5'-monophosphate (UMP)          | 0.47 / 0.58 | NS            |
|                                  | 5-methylcytidine                        | 0.37 / 0.32 | NS            |
|                                  | uridine                                 | 0.36 / 0.47 | NS            |
|                                  | thymidine                               | 0.27 / 0.35 | NS            |
|                                  | thymidine 5'-monophosphate              | 0.23 / 0.51 | NS            |
|                                  | cytidine 5'-monophosphate (5'-CMP)      | 0.23 / 0.33 | NS            |
|                                  | uracil                                  | 0.2 / 0.35  | NS            |
|                                  | 2'-deoxycytidine 5'-monophosphate       | 0.19 / 0.46 | NS            |
|                                  | uridine 3'-monophosphate (3'-UMP)       | NS          | 0.7 / 0.76    |
|                                  | cytosine                                | NS          | 0.14 / 0.24   |
|                                  | cytidine 3'-monophosphate (3'-CMP)      | NS          | 0.8 / 0.71    |
|                                  | cytidine                                | NS          | 0.71 / 0.77   |
|                                  | uridine 2'-monophosphate (2'-UMP)       | NS          | 0.61 / 0.69   |
| ectoine                          |                                         |             | 0.13 / 0.2    |
| Dipeptide                        | alanylleucine                           | 0.75 / 0.66 | NS            |
|                                  | valylglycine                            | 0.74 / 0.69 | NS            |
|                                  | glycylleucine                           | 0.61 / 0.71 | NS            |
|                                  | cys-gly, oxidized                       | NS          | 6.57 / 7.58   |
|                                  | phenylalanylalanine                     | NS          | 0.5 / 0.62    |
| Benzenoids                       | hydroquinone $\beta$ -D-glucopyranoside | 0.42 / 0.36 | NS            |
| Fatty acid and sugar derivatives | galactarate (mucic acid)                | NS          | 0.6 / 0.81    |
| Phenylpropanoids                 | 4-hydroxycinnamate                      | 0.31 / 0.44 | NS            |
|                                  | vanillate                               | 0.34 / 0.5  | 2.26 / 2.27   |
|                                  | 3,4-dimethoxycinnamic acid              |             | 11.88 / 10.84 |
| Terpenoids                       | mevalonate                              |             | 0.38 / 0.69   |
|                                  | mevalonolactone                         |             | 0.22 / 0.49   |
| Chemicals                        | succinimide                             |             | 0.31 / 0.43   |

In the water stress treatments, vermiculite water potentials were  $-1.0$  MPa (cotton) and  $-1.6$  MPa (maize), which resulted in equivalent root tip water potentials in the two species (Figure 2). The fold changes are the averages of comparisons of the water-stressed treatment to well-watered developmental and temporal controls. Comparisons of water-stressed R2 (WSR2) to both well-watered R2 (WWR2) and R3 (WWR3) are shown in each cell as (WSR2/WWR2) / (WSR2/WWR3). Yellow and blue cells indicate significant increases or decreases in abundance, respectively (darker shades,  $p < 0.05$  in all comparisons; lighter shades,  $0.05 < p < 0.10$  in at least one comparison). White cells indicate non-significant (NS) changes in at least one comparison. Gray cells indicate that the metabolite was not detected. No minimum cutoff value was applied to the fold changes.
