# Supplementary material for: Antioxidant Metabolism Underlies Different Metabolic Strategies for Primary Root Growth Maintenance under Water Stress in Cotton and Maize
Source: MDPI journal article supplement (doi:10.3390/antiox11050820), 2022-04-22
Supplement: s1 [file s1]

**Table S1.** Root growth characteristics of cotton and maize primary roots under well-watered and water-stressed conditions

| Cotton | Root Elongation Rate (mm h <sup>-1</sup> ) |                  |                  | Final Cell Length (μm)  |                  |                  | Cell Flux (cells h <sup>-1</sup> ) |                  |                  |
|--------|--------------------------------------------|------------------|------------------|-------------------------|------------------|------------------|------------------------------------|------------------|------------------|
|        | WW                                         | WS<br>(−1.0 MPa) | WS<br>(−1.6 MPa) | WW                      | WS<br>(−1.0 MPa) | WS<br>(−1.6 MPa) | WW                                 | WS<br>(−1.0 MPa) | WS<br>(−1.6 MPa) |
|        | 2.10 ± 0.02                                | 1.04 ± 0.03      | 0.54 ± 0.03      | 158 ± 3                 | 135 ± 4          | 101 ± 3          | 13.2 ± 0.3                         | 7.6 ± 0.1        | 5.4 ± 0.2        |
|        | WS/WW Root Elongation Rate                 |                  |                  | WS/WW Final Cell Length |                  |                  | WS/WW Cell Flux                    |                  |                  |
|        | −1.0 MPa                                   |                  | −1.6 MPa         | −1.0 MPa                |                  | −1.6 MPa         | −1.0 MPa                           |                  | −1.6 MPa         |
|        | 49.5%                                      |                  | 25.7%            | 85.4%                   |                  | 63.9%            | 57.6%                              |                  | 40.9%            |
| Maize  | Root Elongation Rate (mm h <sup>-1</sup> ) |                  |                  | Final Cell Length (μm)  |                  |                  | Cell Flux (cells h <sup>-1</sup> ) |                  |                  |
|        | WW                                         | WS (−1.6 MPa)    |                  | WW                      | WS (−1.6 MPa)    |                  | WW                                 | WS (−1.6 MPa)    |                  |
|        | 2.57 ± 0.02                                | 1.00 ± 0.00      |                  | 190 ± 3                 | 142 ± 4          |                  | 13.6 ± 0.3                         | 7.1 ± 0.2        |                  |
|        | WS/WW Root Elongation Rate                 |                  |                  | WS/WW Final Cell Length |                  |                  | WS/WW Cell Flux                    |                  |                  |
|        | 38.9%                                      |                  |                  | 74.7%                   |                  |                  | 52.2%                              |                  |                  |
|        |                                            |                  |                  |                         |                  |                  |                                    |                  |                  |

Elongation rate, final cortical cell length, and cell flux in well-watered (WW) and water-stressed (WS) primary roots of cotton (cv. AU90810) and maize (cv. FR697), and the ratios of the traits (expressed as percentages) between water-stressed and well-watered conditions. In the water stress treatments, vermiculite water potentials were -1.0 MPa (cotton) and -1.6 MPa (cotton and maize). Data are means ± SE of 5–6 roots, and were collected at 48 h (cotton) or 36 h (maize) after transplanting when root elongation was steady in all treatments (Figure 1). The maize data are reproduced from Voothuluru et al. [77].
