# Supplementary material for: Antioxidant Metabolism Underlies Different Metabolic Strategies for Primary Root Growth Maintenance under Water Stress in Cotton and Maize
Source: MDPI journal article supplement (doi:10.3390/antiox11050820), 2022-04-22
Supplement: s1 [file s1]

**Table S2.** Ratios of metabolite abundance in R1 of the elongation zone between water-stressed and well-watered primary roots of cotton and maize.

| Sub Pathway                                        | Metabolite                         | Cotton   | Maize    |
|----------------------------------------------------|------------------------------------|----------|----------|
|                                                    |                                    | Region 1 | Region 1 |
| Amines and poly-<br>amines                         | 5-methylthioadenosine (MTA)        | 1.56     | NS       |
|                                                    | nicotianamine                      | 0.51     | 0.56     |
|                                                    | putrescine                         | 0.37     | NS       |
|                                                    | <i>N</i> -acetylputrescine         | NS       | 0.72     |
| Aromatic amino<br>acid metabolism<br>(PEP derived) | 3-(4-hydroxyphenyl)lactate         | 4.06     | NS       |
|                                                    | tryptamine                         | 4.97     | 1.97     |
|                                                    | tyramine                           | 3.41     | 6.89     |
|                                                    | tyrosine                           | 1.35     | NS       |
|                                                    | phenylalanine                      | 0.72     | NS       |
|                                                    | 3-methoxytyrosine                  | 0.58     | NS       |
|                                                    | quinate                            | 0.51     | NS       |
|                                                    | kynurenate                         | 0.48     | NS       |
|                                                    | tryptophan                         | NS       | 1.55     |
|                                                    | phenylpyruvate                     | NS       | 0.39     |
|                                                    | <i>N</i> -methylphenylalanine      |          | 26.44    |
|                                                    | O-methyl tyrosine                  |          | 0.55     |
|                                                    | phenyllactate (PLA)                |          | 0.23     |
| Aspartate family<br>(OAA derived)                  | 2-hydroxyadipate                   | 2.43     | NS       |
|                                                    | <i>N</i> -methylpipercolate        | 3.92     | 3.44     |
|                                                    | <i>N</i> -acetyl- $\beta$ -alanine | 3.09     | 0.65     |
|                                                    | methionine                         | 3.08     | NS       |
|                                                    | S-adenosylmethionine (SAM)         | 2.59     | NS       |
|                                                    | lysine                             | 2.29     | NS       |
|                                                    | homoserine lactone                 | 2.07     | NS       |
|                                                    | methionine sulfoxide               | 1.93     | 0.3      |
|                                                    | alanine                            | 1.84     | NS       |
|                                                    | <i>N</i> -acetylalanine            | 0.72     | NS       |
|                                                    | aspartate                          | 0.48     | 0.74     |
|                                                    | S-adenosylhomocysteine (SAH)       | 0.43     | NS       |
|                                                    | asparagine                         | NS       | 3.87     |
|                                                    | 6-oxopiperidine-2-carboxylic acid  | NS       | 2.11     |
|                                                    | allo-threonine                     | NS       | 1.83     |
|                                                    | <i>N</i> 6-carboxymethyllysine     | NS       | 1.75     |
|                                                    | threonine                          | NS       | 1.53     |
|                                                    | S-methylmethionine                 | NS       | 0.8      |
|                                                    | <i>N</i> -acetylaspargate (NAA)    | NS       | 0.21     |
|                                                    | <i>N</i> -acetylaspargine          | NS       | 0.11     |

|                                                |                                      |       |      |
|------------------------------------------------|--------------------------------------|-------|------|
|                                                | <i>N</i> -formylmethionine           | NS    | 0.5  |
|                                                | <i>N</i> -acetylthreonine            |       | 2.07 |
|                                                | N6-carboxyethyllysine                |       | 1.64 |
|                                                | 2-piperidinone                       |       | 1.19 |
|                                                | <i>N</i> -6-trimethyllysine          |       | 0.7  |
|                                                |                                      |       |      |
| Branched Chain Amino Acids (OAA derived)       | allo-isoleucine                      |       | 0.56 |
|                                                |                                      |       |      |
| BCAA-isoleucine catabolism                     | 2-methylglutarate                    | 2.58  | 1.7  |
|                                                |                                      |       |      |
| Branched Chain Amino Acids (pyruvate derived)  | methylsuccinate                      | 5.31  | 1.47 |
|                                                | leucine                              | 1.82  | NS   |
|                                                | $\alpha$ -hydroxyisovalerate         | 1.78  | 2.34 |
|                                                | 2,3-dihydroxyisovalerate             | 0.58  | NS   |
|                                                | 2-isopropylmalate                    | 0.46  | NS   |
|                                                | 3-methyl-2-oxobutyrate               | NS    | 6.85 |
|                                                | 3-hydroxyisobutyrate                 | NS    | 0.56 |
|                                                | 4-methyl-2-oxopentanoate             | NS    | 0.4  |
|                                                | <i>N</i> -methylleucine              |       | 6.95 |
|                                                | 3-hydroxy-2-ethylpropionate          |       | 1.55 |
|                                                | levulinate (4-oxovalerate)           |       | 0.54 |
|                                                | norvaline                            |       | 0.5  |
|                                                |                                      |       |      |
| Glutamate family (alpha-ketoglutarate derived) | pyroglutamine                        | 12.16 | NS   |
|                                                | stachydrine                          | 6.68  | NS   |
|                                                | <i>N</i> -acetylproline              | 4.65  | 1.75 |
|                                                | 1-methylhistidine                    | 4.54  | NS   |
|                                                | trans-4-hydroxyproline               | 3.89  | 3.47 |
|                                                | 3-methylhistidine                    | 1.94  | NS   |
|                                                | carboxyethyl-GABA                    | 1.92  | 0.41 |
|                                                | homocitrulline                       | 1.64  | 0.67 |
|                                                | <i>N</i> - $\delta$ -acetylornithine | 0.82  | NS   |
|                                                | glutamate                            | 0.72  | 0.71 |
|                                                | <i>N</i> -acetylglutamate            | 0.64  | 0.49 |
|                                                | <i>N</i> -monomethylarginine         | 0.6   | NS   |
|                                                | 4-guanidinobutanoate                 | 0.72  | NS   |
|                                                | <i>N</i> -acetylarginine             | 0.58  | NS   |
|                                                | <i>N</i> -methylglutamate            | NS    | 1.64 |
|                                                | arginine                             | NS    | 1.47 |
|                                                | ornithine                            | NS    | 0.67 |
|                                                | dimethylarginine (SDMA + ADMA)       | NS    | 0.52 |
|                                                | <i>N</i> -acetylglutamine            | NS    | 0.28 |
|                                                | 4-acetamidobutanoate                 | NS    | 0.58 |
|                                                | 1,3-diaminopropane                   |       | 0.53 |

|                                          |                                         |      |       |
|------------------------------------------|-----------------------------------------|------|-------|
|                                          | 4-hydroxy-2-oxoglutaric acid            |      | 0.17  |
| Glutathione metabolism                   | ophthalmate                             | 4.42 | NS    |
|                                          | γ-glutamylmethionine                    | 3.83 | NS    |
|                                          | γ-glutamylleucine                       | 2.5  | NS    |
|                                          | glutathione, reduced (GSH)              | 0.71 | 41.38 |
|                                          | glutathione, oxidized (GSSG)            | 0.68 | 6.4   |
|                                          | cysteine-glutathione disulfide          | 0.58 | NS    |
|                                          | γ-glutamylglutamate                     | 0.53 | NS    |
|                                          | γ-glutamyltryptophan                    | NS   | 2.52  |
|                                          | γ-glutamylglycine                       | NS   | 1.67  |
|                                          | γ-glutamylthreonine                     | NS   | 1.87  |
|                                          | γ-glutamylglutamine                     | NS   | 0.47  |
|                                          | 4-hydroxy-nonenal-glutathione           |      | 11.72 |
|                                          | norophthalmate                          |      | 1.64  |
| Serine family (phosphoglycerate derived) | betaine                                 | 4.2  | NS    |
|                                          | serine                                  | 1.76 | 2.58  |
|                                          | <i>N</i> -acetylserine                  | 0.55 | 0.53  |
|                                          | <i>N</i> -acetyltaurine                 | 0.82 | 2.15  |
|                                          | cysteine                                | NS   | 1.7   |
|                                          | sulfate                                 | NS   | 1.22  |
|                                          | O-acetylserine                          |      | 0.53  |
|                                          | homocysteine                            |      | 0.39  |
| Amino sugar and nucleotide sugar         | arabonate                               | 1.65 | NS    |
|                                          | UDP- <i>N</i> -acetylglucosamine        | 0.67 | 0.7   |
|                                          | ribose                                  | 0.62 | NS    |
|                                          | UDP- <i>N</i> -acetylgalactosamine      | 0.68 | NS    |
|                                          | <i>N</i> -acetylglucosamine 6-phosphate | 0.67 | 3.05  |
|                                          | ribulose                                | NS   | 0.48  |
|                                          | ribonate                                | NS   | 0.41  |
|                                          | xylulose                                |      | 0.62  |
|                                          | maltol                                  |      | 0.5   |
|                                          | xylitol                                 |      | 0.74  |
| C5 branched dibasic acid metabolism      | itaconate (methylenesuccinate)          |      | 0.46  |
| Calvin cycle and pentose phosphate       | ribose 5-phosphate                      |      | 0.61  |
|                                          | ribose 1-phosphate                      |      | 0.52  |
| Glycolysis                               | pyruvate                                | 1.94 | 0.53  |
|                                          | lactate                                 | 1.92 | NS    |
|                                          | glucuronate                             | 0.6  | NS    |

|                                        |                                                       |       |      |
|----------------------------------------|-------------------------------------------------------|-------|------|
|                                        | glucose 6-phosphate                                   | 0.59  | NS   |
| Inositol metabolism                    | inositol 1-phosphate (I1P)                            | 0.41  | NS   |
| Photorespiration                       | oxalate (ethanedioate)                                | 0.84  | NS   |
| Sucrose, glucose, fructose metabolism  | galactinol                                            | 5.08  |      |
|                                        | galactonate                                           | 1.61  | NS   |
|                                        | mannose-6-phosphate                                   | 0.67  | NS   |
|                                        | mannitol                                              | 0.73  | NS   |
|                                        | 3-deoxyoctulosonate                                   | 0.73  | NS   |
|                                        | maltotriose                                           | NS    | 1.43 |
|                                        | galactose 1-phosphate                                 | NS    | 0.64 |
|                                        | methyl glucopyranoside ( $\alpha + \beta$ )           | NS    | 0.55 |
|                                        | 1-kestose                                             |       | 3.78 |
|                                        | sucrose-6-phosphate                                   |       | 2.34 |
|                                        | erythrose                                             |       | 2.16 |
|                                        | glucoheptose                                          |       | 0.29 |
| TCA cycle                              | citrate                                               | 0.43  | 0.38 |
|                                        | aconitate                                             | 0.31  | 0.63 |
|                                        | isocitrate                                            | 0.24  | NS   |
|                                        | succinate                                             | 0.75  | 0.5  |
|                                        | $\alpha$ -ketoglutarate                               | NS    | 3.57 |
|                                        | malate                                                | NS    | 0.67 |
|                                        | maleate                                               | NS    | 0.41 |
| Carnitine metabolism                   | deoxycarnitine                                        | 11.05 | NS   |
| Ascorbate metabolism                   | gulonate                                              | NS    | 0.64 |
| CoA metabolism                         | phosphopantetheine                                    |       | 4.59 |
| Nicotinate and nicotinamide metabolism | trigonelline (N'-methylnicotinate)                    | 2.32  | 0.39 |
|                                        | nicotinate ribonucleoside                             | 0.75  | 0.43 |
|                                        | nicotinamide adenine dinucleotide (NAD <sup>+</sup> ) | 0.62  | 0.76 |
|                                        | nicotinate                                            | 0.42  | NS   |
|                                        | nicotinamide ribonucleotide (NMN)                     | NS    | 0.67 |
|                                        | nicotinamide                                          | NS    | 0.35 |
|                                        | nicotinamide riboside                                 | NS    | 0.27 |
| Oxidative phosphorylation              | methylphosphate                                       | 0.68  | NS   |

|                                  |                                                    |      |       |
|----------------------------------|----------------------------------------------------|------|-------|
| Riboflavin and FAD metabolism    | flavin adenine dinucleotide (FAD)                  | 0.51 | 0.35  |
|                                  | flavin mononucleotide (FMN)                        | 0.4  | NS    |
| Thiamine metabolism              | thiamin (Vitamin B1)                               | 0.52 | NS    |
| Vitamin B metabolism (B6 or B12) | pyridoxine (Vitamin B6)                            | 0.67 | NS    |
|                                  | pyridoxal                                          | 0.55 | 0.59  |
| Choline metabolism               | 2-dimethylaminoethanol                             |      | 0.1   |
| Fatty acid, Amino                | 2-aminoheptanoate                                  | 3.45 | NS    |
| Fatty acid, Dicarboxylate        | pimelate (heptanedioate)                           | 7    | 0.61  |
|                                  | glutarate (pentanedioate)                          | 3.06 | NS    |
|                                  | malonate                                           | 2.03 | 1.66  |
|                                  | adipate                                            | 1.48 | 0.65  |
|                                  | azelate (nonanedioate)                             | 0.81 | NS    |
|                                  | suberate (octanedioate)                            | 0.71 | NS    |
|                                  | ethylmalonate                                      |      | 0.46  |
|                                  | dodecanedioate                                     |      | 0.33  |
| Free fatty acid                  | 3-hydroxybutyrate (BHBA)                           | 0.79 | NS    |
|                                  | linolenate [ $\alpha$ or $\gamma$ ; (18:3n3 or 6)] | 0.41 | NS    |
|                                  | 2-hydroxypalmitate                                 | NS   | 0.57  |
|                                  | arachidate (20:0)                                  | NS   | 0.53  |
|                                  | 2-hydroxystearate                                  | NS   | 0.5   |
|                                  | eicosenoate (20:1)                                 | NS   | 0.33  |
|                                  | palmitate (16:0)                                   | NS   | 0.75  |
|                                  | oleate (18:1n9)                                    |      | 0.57  |
|                                  | heptanoate (7:0)                                   |      | 0.33  |
| Phospholipids                    | choline                                            | 0.8  | NS    |
|                                  | 1-palmitoyl-GPE (16:0)                             | 0.71 | NS    |
|                                  | 1-linoleoyl-GPE (18:2)                             | 0.69 | NS    |
|                                  | 1-oleoyl-GPE (18:1)                                | 0.6  | 0.57  |
|                                  | ethanolamine                                       | 0.56 | NS    |
|                                  | 1-palmitoyl-GPA (16:0)                             | 0.54 | NS    |
|                                  | 1-oleoyl-GPA (18:1)                                | 0.47 | 0.32  |
|                                  | 1-palmitoyl-GPG (16:0)                             | 0.62 | NS    |
|                                  | 1-oleoyl-GPG (18:1)                                | 0.48 | 0.34  |
|                                  | 1-linoleoyl-GPI (18:2)                             | 0.44 | 0.26  |
|                                  | glycerophosphoethanolamine                         | NS   | 31.92 |
|                                  | glycerophosphoglycerol                             | NS   | 27.39 |
|                                  | glycerophosphoinositol                             | NS   | 6.62  |

|                   |                                            |      |      |
|-------------------|--------------------------------------------|------|------|
|                   | glycerol 3-phosphate                       | NS   | 6.5  |
|                   | 1-palmitoyl-2-oleoyl-GPC (16:0/18:1)       | NS   | 2.59 |
|                   | 1-palmitoyl-2-linoleoyl-GPC (16:0/18:2)    | NS   | 2.39 |
|                   | glycerol                                   | NS   | 1.25 |
|                   | 1-oleoyl-2-linoleoyl-GPI (18:1/18:2)       | NS   | 0.47 |
|                   | 1-palmitoyl-2-oleoyl-GPE (16:0/18:1)       | NS   | 0.36 |
|                   | 1-oleoyl-GPI (18:1)                        | NS   | 0.21 |
|                   | 1-palmitoylglycerol (16:0)                 | NS   | 0.43 |
|                   | 1-palmitoyl-2-arachidonoyl-GPC (16:0/20:4) |      | 3.81 |
|                   | 2-palmitoylglycerol (16:0)                 |      | 0.41 |
|                   | 1-oleoylglycerol (18:1)                    |      | 0.45 |
| Sphingolipid      | sphingosine                                | 0.52 | 0.11 |
|                   | sphinganine                                | NS   | 0.18 |
| Sterols           | stigmasterol                               | 1.68 | 0.44 |
|                   | campesterol                                | NS   | 0.57 |
|                   | 3-hydroxy-3-methylglutarate                | NS   | 0.57 |
|                   | fucosterol                                 | NS   | 0.5  |
| Purine metabolism | adenosine 3'-monophosphate (3'-AMP)        | 9.39 | 0.36 |
|                   | guanosine 3'-monophosphate (3'-GMP)        | 3.94 | NS   |
|                   | adenosine-2',3'-cyclic monophosphate       | 2.78 | NS   |
|                   | inosine 5'-monophosphate (IMP)             | 2.32 | 0.6  |
|                   | adenosine 2'-monophosphate (2'-AMP)        | 1.55 | NS   |
|                   | N6-carbamoylthreonyladenosine              | 0.76 | NS   |
|                   | adenosine 5'-monophosphate (AMP)           | 0.61 | NS   |
|                   | guanosine 5'- monophosphate (5'-GMP)       | 0.49 | 1.51 |
|                   | N6-succinyladenosine                       | 0.49 | NS   |
|                   | guanosine                                  | 0.47 | 0.62 |
|                   | N2-methylguanosine                         | 0.44 | NS   |
|                   | N1-methyladenosine                         | 0.35 | NS   |
|                   | N6-methyladenosine                         | 0.3  | NS   |
|                   | xanthine                                   | 0.24 | NS   |
|                   | adenine                                    | 0.24 | NS   |
|                   | 2'-deoxyinosine                            | 0.21 | NS   |
|                   | 2'-deoxyguanosine                          | 0.12 | 0.61 |
|                   | 2'-deoxyadenosine                          | 0.11 | 0.64 |
|                   | 2'-deoxyadenosine 5'-monophosphate         | 0.11 | NS   |
|                   | 2'-deoxyguanosine 5'-monophosphate (dGMP)  | 0.11 | NS   |
|                   | guanine                                    | 0.67 | NS   |
|                   | 7-methylguanosine                          | 0.58 | NS   |
|                   | N1-methylguanosine                         | 0.49 | NS   |
|                   | allantoin                                  | NS   | 3.04 |
|                   | N2,N2-dimethylguanosine                    | NS   | 2.94 |

|                                  |                                            |      |      |
|----------------------------------|--------------------------------------------|------|------|
|                                  | allantoic acid                             | NS   | 0.5  |
|                                  | inosine                                    | NS   | 0.27 |
|                                  | 2'-O-methyladenosine                       | NS   | 0.63 |
|                                  | urate                                      | NS   | 0.27 |
|                                  | 2'-deoxyadenosine 3'-monophosphate         |      | 0.45 |
|                                  | 2'-deoxyguanosine 3'-monophosphate         |      | 0.45 |
| Pyrimidine metabolism            | β-alanine                                  | 3.03 | 3.6  |
|                                  | uridine 2'-monophosphate (2'-UMP)          | 0.61 | NS   |
|                                  | cytidine 3'-monophosphate (3'-CMP)         | 0.59 | NS   |
|                                  | uridine                                    | 0.53 | 0.56 |
|                                  | orotate                                    | 0.52 | 0.22 |
|                                  | uracil                                     | 0.47 | NS   |
|                                  | pseudouridine                              | 0.41 | NS   |
|                                  | cytidine 5'-monophosphate (5'-CMP)         | 0.32 | 0.56 |
|                                  | 5-methylcytidine                           | 0.25 | NS   |
|                                  | 5-methyluridine (ribothymidine)            | 0.2  | NS   |
|                                  | 5-methyl-2'-deoxycytidine                  | 0.18 | 0.46 |
|                                  | thymidine                                  | 0.17 | 0.66 |
|                                  | thymidine 5'-monophosphate                 | 0.15 | NS   |
|                                  | 2'-deoxycytidine 5'-monophosphate          | 0.14 | 0.63 |
|                                  | 2'-deoxycytidine                           | 0.1  | 0.42 |
|                                  | 3-ureidopropionate                         | 0.65 | NS   |
|                                  | cytidine                                   | NS   | 0.51 |
|                                  | cytosine                                   | NS   | 0.11 |
|                                  | 3-aminoisobutyrate                         |      | 1.86 |
|                                  | thymidine 3'-monophosphate                 |      | 0.36 |
|                                  | ectoine                                    |      | 0.07 |
| Dipeptide                        | cys-gly, oxidized                          | 2.54 | 4.85 |
|                                  | glutaminylleucine                          | 1.28 | NS   |
|                                  | leucylglycine                              | 1.65 | NS   |
|                                  | alanylleucine                              | NS   | 0.7  |
|                                  | threonylphenylalanine                      | NS   | 0.68 |
|                                  | phenylalanylalanine                        | NS   | 0.46 |
|                                  | leucylglutamine                            | NS   | 0.61 |
|                                  | leucylphenylalanine/isoleucylphenylalanine |      | 0.36 |
| Benzenoids                       | hydroquinone β-D-glucopyranoside           | 0.62 | NS   |
| Fatty acid and sugar derivatives | galactarate (mucic acid)                   | NS   | 0.6  |
| Phenylpropanoids                 | ferulate                                   | 1.76 | NS   |
|                                  | 4-hydroxycinnamate                         | 0.53 | 2.15 |

|            |                            |    |      |
|------------|----------------------------|----|------|
|            | vanillate                  | NS | 1.85 |
|            | 3,4-dimethoxycinnamic acid |    | 4.74 |
|            | coniferyl aldehyde         |    | 1.4  |
| Terpenoids | mevalonate                 |    | 0.53 |
|            | mevalonolactone            |    | 0.29 |
| Chemicals  | succinimide                |    | 0.2  |

In the water stress treatments, vermiculite water potentials were  $-1.0$  MPa (cotton) and  $-1.6$  MPa (maize), which resulted in equivalent root tip water potentials in the two species (Figure 2). The fold changes are the averages of comparisons of the water-stressed treatment to well-watered developmental and temporal controls. Yellow and blue cells indicate significant increases or decreases in abundance, respectively (darker shades,  $p < 0.05$  in all comparisons; lighter shades,  $0.05 < p < 0.10$  in at least one comparison). White cells indicate non-significant (NS) changes in at least one comparison. Gray cells indicate that the metabolite was not detected. No minimum cutoff value was applied to the fold changes.
