# Supplementary material for: Antioxidant Metabolism Underlies Different Metabolic Strategies for Primary Root Growth Maintenance under Water Stress in Cotton and Maize
Source: Antioxidants (Basel). 2022 Apr 22;11(5):820. doi: 10.3390/antiox11050820 (PMC9137980; doi:10.3390/antiox11050820)
Supplement: Supplementary file 1 [file antioxidants-11-00820-s001.zip]

Archive with 6 entries (6 files):
- Figure S1.pdf
- Supplementary Data S1.xlsx
- Supplementary Data S2.xlsx
- Table S1.pdf
- Table S2.pdf
- Table S3.pdf
