# Supplementary material for: Antioxidant Metabolism Underlies Different Metabolic Strategies for Primary Root Growth Maintenance under Water Stress in Cotton and Maize
Source: Antioxidants (Basel). 2022 Apr 22;11(5):820. doi: 10.3390/antiox11050820 (PMC9137980; doi:10.3390/antiox11050820)
Supplement: Supplementary file 1 [file antioxidants-11-00820-s001.zip › Supplementary Data S1.xlsx]

## Sheet: Explanation
Supplementary Data S1. Metabolite profiles and box plots for comparisons of R1-R3 within the elongation zone of cotton and maize primary roots in well-watered developmental control (WWD), well-watered temporal control (WWT), and water-stressed (WS) treatments.
	Pathway Heat Map		This is the heat map associated with the statistical analysis of the data.
			Indicates ratios, p- and q-values for each comparison.
			0.55	Blue: indicates significant difference (p ≤ 0.05) between the groups shown, metabolite ratio of < 1.00
			0.76	Light Blue: narrowly missed statistical cutoff for significance 0.05 < p < 0.10, metabolite ratio of < 1.00
			1.71	Yellow: indicates significant difference (p ≤ 0.05) between the groups shown; metabolite ratio of ≥ 1.00
			1.32	Light Yellow: narrowly missed statistical cutoff for significance 0.05 < p < 0.10, metabolite ratio of ≥ 1.00
			1.2	Non-colored text and cell: mean values are not significantly different for that comparison
		* indicates compounds that have not been officially confirmed based on a standard, but the facility is confident in its identity
	Box Plots		Box plots are provided for each biochemical detected, sorted alphabetically by biochemical name.
	Example:

## Sheet: Cotton Statistical Heat Map
	Heat map of statistically significant biochemicals profiled in this study. Yellow and blue shaded cells indicate p≤0.05 (yellow indicates that the mean values are significantly higher for that comparison; blue values significantly lower). Light yellow and light blue shaded cells indicate 0.05<p<0.10 (light yellow indicates that the mean values trend higher for that comparison; light blue values t…							Ratios of Group Means in Scaled Imputed Data							Statistical Values (From ln transformed Scaled Imputed Data)													Mean Values (Scaled Imputed Data)									% Detected by Group in RAW Data									Chemical Properties
								WATER STRESS EFFECTS							WS1 / WWD1		WS1 / WWT1		WS2 / WWD2		WS2 / WWT2		WS2 / WWD3		WS2 / WWT3
	Pathway Order	Alpha	Comp ID	Super Pathway	Sub Pathway	Biochemical Name	X	WS1 / WWD1	WS1 / WWT1	WS2 / WWD2	WS2 / WWT2	WS2 / WWD3	WS2 / WWT3	X	p-value	q-value	p-value	q-value	p-value	q-value	p-value	q-value	p-value	q-value	p-value	q-value	X	WWD1	WWD2	WWD3	WWT1	WWT2	WWT3	WS1	WS2	X	WWD1	WWD2	WWD3	WWT1	WWT2	WWT3	WS1	WS2	X	Biochemical Name	Super Pathway	Sub Pathway	Chemical ID
	305	144	1419	Amino acid	Amines and polyamines	5-methylthioadenosine (MTA)		1.7	1.42	0.54	0.59	0.62	0.64		0.0006	0.0004	0.0092	0.0048	4.895e-05	0.0001	8.6029e-05	8.2565e-05	0.0001	0.0002	0.0026	0.0016		0.5555	1.3871	1.22	0.6657	1.2666	1.1677	0.9422	0.7518		100	100	100	100	100	100	100	100		5-methylthioadenosine (MTA)	Amino acid	Amines and polyamines	212
	306	164	15496	Amino acid	Amines and polyamines	agmatine		0.5	0.97	0.15	0.19	0.08	0.14		0.0319	0.0077	0.8242	0.1778	0.0006	0.0004	0.0026	0.0009	0.0001	0.0002	0.0005	0.0005		0.4322	1.2419	2.2344	0.2244	0.9825	1.3344	0.217	0.1875		100	100	100	75	100	100	25	0		agmatine	Amino acid	Amines and polyamines	100000103
	313	395	37496	Amino acid	Amines and polyamines	N-acetylputrescine		0.54	1.13	0.49	0.6	0.4	0.4		4.567e-06	2.0061e-05	0.0416	0.016	0.0004	0.0003	0.0015	0.0006	7.7223e-05	0.0001	0.0001	0.0002		0.9693	1.2608	1.5481	0.464	1.0308	1.5715	0.5247	0.6221		100	100	100	100	100	100	100	100		N-acetylputrescine	Amino acid	Amines and polyamines	192
	314	406	43026	Amino acid	Amines and polyamines	nicotianamine		0.53	0.49	0.83	0.65	0.64	0.57		0.0314	0.0076	0.0001	0.0003	0.6116	0.1191	2.9152e-05	4.0348e-05	0.0012	0.0009	0.0032	0.0019		1.1385	0.7775	1.0108	1.2243	0.9984	1.1396	0.6047	0.6451		100	100	100	100	100	100	100	100		nicotianamine	Amino acid	Amines and polyamines	100004035
	307	460	1408	Amino acid	Amines and polyamines	putrescine		0.33	0.4	0.03	0.03	0.02	0.02		0.0006	0.0004	0.0019	0.0015	3.2507e-07	3.2084e-05	5.6749e-05	6.7444e-05	2.2551e-07	9.9171e-06	4.0879e-06	2.6603e-05		0.3549	1.5046	2.4917	0.2918	1.3184	2.227	0.117	0.0404		100	100	100	100	100	100	100	50		putrescine	Amino acid	Amines and polyamines	49
	308	491	485	Amino acid	Amines and polyamines	spermidine		1.43	0.51	0.05	0.12	0.08	0.05		0.256	0.0406	0.7339	0.1621	0.0015	0.0008	0.0011	0.0005	0.0006	0.0006	0.0008	0.0007		0.4072	2.7083	1.5862	1.1443	1.0804	2.6721	0.5836	0.1347		100	100	100	100	100	100	100	100		spermidine	Amino acid	Amines and polyamines	50
	32	116	32197	Amino acid	Aromatic amino acid metabolism (PEP derived)	3-(4-hydroxyphenyl)lactate		4.12	3.99	8.78	4.05	5.01	3.31		0.0021	0.0009	0.0016	0.0013	4.6578e-06	4.467e-05	0.0099	0.0025	0.0048	0.0025	0.0016	0.0011		0.3207	0.3496	0.6134	0.3311	0.758	0.9276	1.3202	3.0711		0	25	100	25	75	100	100	100		3-(4-hydroxyphenyl)lactate	Amino acid	Aromatic amino acid metabolism (PEP derived)	240
	37	123	12017	Amino acid	Aromatic amino acid metabolism (PEP derived)	3-methoxytyrosine		0.59	0.56	0.69	0.66	0.62	0.82		0.0146	0.004	0.0111	0.0057	0.0259	0.0069	0.018	0.004	0.0135	0.0053	0.2512	0.0674		1.4506	0.9828	1.1009	1.527	1.0335	0.8223	0.8538	0.6774		100	100	100	100	100	100	100	100		3-methoxytyrosine	Amino acid	Aromatic amino acid metabolism (PEP derived)	1342
	39	138	1669	Amino acid	Aromatic amino acid metabolism (PEP derived)	4-hydroxyphenylpyruvate		2.71	1.23	6.97	1.64	2.66	1.14		0.0252	0.0063	0.53	0.1255	0.0003	0.0002	0.0603	0.0114	0.0006	0.0006	0.4479	0.1091		0.2788	0.2788	0.7295	0.6155	1.1863	1.6984	0.7564	1.9436		0	25	100	75	100	100	100	100		4-hydroxyphenylpyruvate	Amino acid	Aromatic amino acid metabolism (PEP derived)	1141
	51	329	1417	Amino acid	Aromatic amino acid metabolism (PEP derived)	kynurenate		0.65	0.31	0.85	0.47	0.88	0.52		0.0012	0.0006	1.7763e-06	1.9311e-05	0.0835	0.0201	2.5434e-05	3.8058e-05	0.3297	0.0788	0.0002	0.0003		0.9739	0.9347	0.902	2.0065	1.6896	1.5419	0.6308	0.7977		100	100	100	100	100	100	100	100		kynurenate	Amino acid	Aromatic amino acid metabolism (PEP derived)	98
	54	393	33950	Amino acid	Aromatic amino acid metabolism (PEP derived)	N-acetylphenylalanine		0.65	0.84	0.41	0.6	0.45	0.64		0.0321	0.0077	0.2199	0.063	0.0069	0.0023	0.0404	0.008	0.0118	0.0048	0.0568	0.0192		1.2452	1.4691	1.351	0.9632	1.0159	0.9472	0.8079	0.6073		100	100	100	100	100	100	100	75		N-acetylphenylalanine	Amino acid	Aromatic amino acid metabolism (PEP derived)	100001256
	91	405	48433	Amino acid	Aromatic amino acid metabolism (PEP derived)	N-formylphenylalanine		0.41	0.36	0.33	0.38	0.34	0.53		0.0146	0.004	0.0241	0.0105	0.0041	0.0016	0.0083	0.0022	0.0045	0.0024	0.0402	0.0145		1.0153	1.4742	1.4186	1.1427	1.2539	0.9119	0.4164	0.4811		100	100	100	100	100	100	75	75		N-formylphenylalanine	Amino acid	Aromatic amino acid metabolism (PEP derived)	100006056
	82	429	45413	Amino acid	Aromatic amino acid metabolism (PEP derived)	O-sulfo-L-tyrosine		0.83	0.72	0.9	0.83	1.03	1		0.1366	0.0244	0.0323	0.0132	0.2642	0.0568	0.1994	0.0319	0.7608	0.1592	0.9625	0.206		1.2749	0.9625	0.8421	1.4745	1.05	0.8691	1.0594	0.8677		100	100	100	100	100	100	100	100		O-sulfo-L-tyrosine	Amino acid	Aromatic amino acid metabolism (PEP derived)	100005384
	60	443	12142	Amino acid	Aromatic amino acid metabolism (PEP derived)	phenethylamine		0.73	2.1	0.69	1.71	0.36	0.9		0.0165	0.0044	0.0015	0.0013	0.0035	0.0014	9.6013e-07	1.0857e-05	2.0777e-05	7.3206e-05	0.1745	0.0496		0.8078	1.6821	3.2057	0.28	0.6789	1.2966	0.5869	1.1638		100	100	100	100	100	100	100	100		phenethylamine	Amino acid	Aromatic amino acid metabolism (PEP derived)	1207
	63	446	64	Amino acid	Aromatic amino acid metabolism (PEP derived)	phenylalanine		0.72	0.72	0.44	0.5	0.32	0.42		0.0003	0.0002	0.0004	0.0005	0.0002	0.0002	0.0009	0.0004	3.1449e-05	8.5855e-05	0.0006	0.0006		0.6218	1.5012	2.1053	0.6214	1.3281	1.5692	0.4464	0.6644		100	100	100	100	100	100	100	100		phenylalanine	Amino acid	Aromatic amino acid metabolism (PEP derived)	460
	65	449	566	Amino acid	Aromatic amino acid metabolism (PEP derived)	phenylpyruvate		1.38	0.66	0.26	0.32	0.25	0.31		0.0302	0.0073	0.0098	0.005	0.0003	0.0002	5.1366e-05	6.3136e-05	1.4271e-06	1.9309e-05	1.9769e-06	2.3337e-05		0.4536	1.3723	1.4106	0.9556	1.1063	1.1643	0.6266	0.3567		100	100	100	100	100	100	100	100		phenylpyruvate	Amino acid	Aromatic amino acid metabolism (PEP derived)	241
	66	470	18335	Amino acid	Aromatic amino acid metabolism (PEP derived)	quinate		0.6	0.41	0.57	0.4	0.64	0.44		2.481e-05	4.7818e-05	5.3491e-07	1.0003e-05	1.8089e-05	5.7593e-05	1.995e-07	5.2459e-06	0.0001	0.0002	5.3617e-07	1.5962e-05		0.8996	1.049	0.9364	1.3061	1.4946	1.3679	0.5393	0.597		100	100	100	100	100	100	100	100		quinate	Amino acid	Aromatic amino acid metabolism (PEP derived)	100000442
	68	486	15144	Amino acid	Aromatic amino acid metabolism (PEP derived)	shikimate		0.5	0.52	0.3	0.35	0.31	0.37		1.3824e-05	3.8116e-05	7.7162e-06	4.8099e-05	6.8885e-05	0.0001	4.2977e-05	5.5759e-05	1.2515e-05	5.5118e-05	0.0002	0.0003		0.9523	1.2736	1.253	0.9279	1.0905	1.0508	0.4805	0.3845		100	100	100	100	100	100	100	100		shikimate	Amino acid	Aromatic amino acid metabolism (PEP derived)	100000293
	83	518	6104	Amino acid	Aromatic amino acid metabolism (PEP derived)	tryptamine		2.35	7.58	2.91	4.87	1.63	2.27		0.0149	0.0041	0.0004	0.0005	0.0001	0.0001	0.0001	0.0001	0.0069	0.0032	0.0005	0.0006		0.3026	1.0403	1.864	0.0937	0.623	1.3364	0.71	3.0314		100	100	100	25	100	100	100	100		tryptamine	Amino acid	Aromatic amino acid metabolism (PEP derived)	1095
	69	519	54	Amino acid	Aromatic amino acid metabolism (PEP derived)	tryptophan		1.22	0.95	2.18	1.44	1.5	1.18		0.011	0.0033	0.4414	0.11	3.0982e-06	4.467e-05	0.0016	0.0006	0.0009	0.0008	0.0501	0.0172		0.6776	0.8109	1.1818	0.8723	1.227	1.5059	0.8295	1.7716		100	100	100	100	100	100	100	100		tryptophan	Amino acid	Aromatic amino acid metabolism (PEP derived)	565
	85	521	1603	Amino acid	Aromatic amino acid metabolism (PEP derived)	tyramine		1.48	5.33	2.45	4.26	1.49	2.21		0.0329	0.0078	8.8365e-05	0.0002	0.0002	0.0002	7.5505e-06	2.1761e-05	0.0375	0.0117	0.0004	0.0005		0.6086	1.0834	1.7832	0.1691	0.623	1.2029	0.9008	2.655		100	100	100	100	100	100	100	100		tyramine	Amino acid	Aromatic amino acid metabolism (PEP derived)	1133
	71	522	1299	Amino acid	Aromatic amino acid metabolism (PEP derived)	tyrosine		1.46	1.23	2.13	1.29	1.58	1.03		0.0081	0.0027	0.0573	0.0212	0.0002	0.0002	0.0183	0.0041	0.0001	0.0002	0.7004	0.1576		0.5898	0.8254	1.1101	0.6995	1.3638	1.713	0.8619	1.7588		100	100	100	100	100	100	100	100		tyrosine	Amino acid	Aromatic amino acid metabolism (PEP derived)	815
	112	87	6146	Amino acid	Aspartate family (OAA derived)	2-aminoadipate		3.27	1.71	2	1.63	1.58	2.37		6.7975e-05	9.337e-05	0.0066	0.0037	0.0018	0.0009	0.0124	0.0029	0.0135	0.0053	0.0018	0.0012		0.5636	0.8062	1.0181	1.0792	0.9876	0.6815	1.8446	1.6127		100	100	100	100	100	100	100	100		2-aminoadipate	Amino acid	Aspartate family (OAA derived)	381
	153	99	31934	Amino acid	Aspartate family (OAA derived)	2-hydroxyadipate		3.36	1.49	2.78	1.66	3.15	2.1		1.2217e-06	8.3402e-06	0.0079	0.0043	6.0464e-05	0.0001	0.002	0.0007	2.8386e-05	8.4882e-05	0.0004	0.0004		0.6451	0.6637	0.5852	1.4539	1.111	0.8783	2.1693	1.8435		100	100	100	100	100	100	100	100		2-hydroxyadipate	Amino acid	Aspartate family (OAA derived)	100001153
	149	147	43231	Amino acid	Aspartate family (OAA derived)	6-oxopiperidine-2-carboxylate		3.11	1.14	3.66	1.74	1.75	1.78		0.0012	0.0006	0.5435	0.1271	0.0008	0.0005	0.0049	0.0014	0.0843	0.0231	0.0013	0.001		0.4931	0.4529	0.9489	1.3499	0.9553	0.9332	1.5348	1.6577		100	100	100	100	100	100	100	100		6-oxopiperidine-2-carboxylate	Amino acid	Aspartate family (OAA derived)	100004499
	114	165	1126	Amino acid	Aspartate family (OAA derived)	alanine		1.35	2.33	0.71	0.82	0.4	0.49		0.0044	0.0016	0.0003	0.0005	0.0091	0.0029	0.0126	0.003	5.2399e-05	0.0001	2.1404e-05	7.8163e-05		0.4656	1.2587	2.2273	0.2692	1.0809	1.8017	0.6273	0.8908		100	100	100	100	100	100	100	100		alanine	Amino acid	Aspartate family (OAA derived)	811
	115	169	15142	Amino acid	Aspartate family (OAA derived)	allo-threonine		2.14	2.17	1.49	1.47	1.04	0.91		0.1385	0.0246	0.1269	0.04	0.2318	0.0506	0.2423	0.0379	0.6078	0.133	0.0829	0.0263		0.4714	0.6384	0.9171	0.4643	0.6461	1.0493	1.0088	0.9506		75	100	75	75	75	100	100	100		allo-threonine	Amino acid	Aspartate family (OAA derived)	100000272
	116	181	512	Amino acid	Aspartate family (OAA derived)	asparagine		1.15	1.44	0.82	1.11	0.6	0.81		0.123	0.0223	0.0043	0.0027	0.0006	0.0003	0.0078	0.0021	2.2058e-06	1.9429e-05	0.0004	0.0005		0.3689	1.2939	1.7529	0.2936	0.9558	1.3104	0.4233	1.0576		100	100	100	100	100	100	100	100		asparagine	Amino acid	Aspartate family (OAA derived)	917
	117	182	443	Amino acid	Aspartate family (OAA derived)	aspartate		0.4	0.55	0.54	0.53	0.71	0.69		0.0078	0.0026	0.0246	0.0107	0.0129	0.0038	0.0138	0.0032	0.0627	0.0179	0.0563	0.0191		2.6401	1.0259	0.7868	1.9298	1.0481	0.8014	1.0526	0.5555		100	100	100	100	100	100	100	100		aspartate	Amino acid	Aspartate family (OAA derived)	234
	120	310	18351	Amino acid	Aspartate family (OAA derived)	homoserine		0.83	0.87	0.55	1.51	0.8	1.33		0.353	0.053	0.371	0.0957	0.3219	0.068	0.1513	0.025	0.2904	0.0703	0.3094	0.0813		2.3712	1.3589	0.9344	2.2715	0.4919	0.5584	1.9799	0.7429		100	100	100	100	50	100	100	100		homoserine	Amino acid	Aspartate family (OAA derived)	100000458
	121	311	15696	Amino acid	Aspartate family (OAA derived)	homoserine lactone		2.57	1.56	1.54	1.25	0.85	0.96		0.0042	0.0016	0.0041	0.0026	0.0044	0.0017	0.0573	0.0109	0.3937	0.0921	0.788	0.1753		0.4	0.8597	1.551	0.6593	1.0591	1.3702	1.0272	1.3199		100	100	100	100	100	100	100	100		homoserine lactone	Amino acid	Aspartate family (OAA derived)	100000262
	123	344	1301	Amino acid	Aspartate family (OAA derived)	lysine		2.48	2.09	2.06	1.63	1.35	1.15		0.001	0.0005	0.0027	0.0019	0.0004	0.0003	8.1559e-06	2.1977e-05	0.0009	0.0008	0.0056	0.003		0.3311	0.8099	1.2337	0.3928	1.024	1.4487	0.8206	1.6666		100	100	100	100	100	100	100	100		lysine	Amino acid	Aspartate family (OAA derived)	407
	124	356	1302	Amino acid	Aspartate family (OAA derived)	methionine		4.28	1.87	1.91	1.19	1.13	1.04		0.0001	0.0001	0.0169	0.0078	0.0149	0.0043	0.3883	0.0566	0.5666	0.1258	0.9132	0.1981		0.1699	0.83	1.4071	0.3883	1.3284	1.519	0.7266	1.5848		100	100	100	100	100	100	100	100		methionine	Amino acid	Aspartate family (OAA derived)	415
	125	357	18374	Amino acid	Aspartate family (OAA derived)	methionine sulfoxide		2.44	1.41	1.4	1.11	1.45	1		1.4614e-05	3.88e-05	0.0042	0.0026	0.0103	0.0032	0.2697	0.041	0.0064	0.003	0.9915	0.211		0.4798	0.8918	0.8633	0.8327	1.1246	1.251	1.171	1.2515		100	100	100	100	100	100	100	100		methionine sulfoxide	Amino acid	Aspartate family (OAA derived)	100000039
	127	371	36752	Amino acid	Aspartate family (OAA derived)	N6-acetyllysine		5.15	2.34	3.89	2.11	1.72	1.41		2.1867e-05	4.4755e-05	0.0008	0.0008	0.0001	0.0001	0.0003	0.0002	0.0016	0.0012	0.0078	0.0037		0.1981	0.5722	1.2936	0.4354	1.0551	1.579	1.0194	2.2261		100	100	100	100	100	100	100	100		N6-acetyllysine	Amino acid	Aspartate family (OAA derived)	100001734
	158	373	36713	Amino acid	Aspartate family (OAA derived)	N6-carboxymethyllysine		0.93	1.24	0.77	1.06	1.09	1.71		0.2467	0.0395	0.0111	0.0057	0.0685	0.0168	0.7022	0.0959	0.5172	0.1166	0.0061	0.0031		1.6437	1.1001	0.7776	1.226	0.8024	0.4945	1.5213	0.8473		100	100	100	100	100	100	100	100		N6-carboxymethyllysine	Amino acid	Aspartate family (OAA derived)	100001768
	130	377	1585	Amino acid	Aspartate family (OAA derived)	N-acetylalanine		0.73	0.71	0.55	0.77	0.69	0.76		0.0407	0.0093	0.0295	0.0123	0.0042	0.0016	0.0753	0.0138	0.0324	0.0104	0.1063	0.0325		1.1541	1.1871	0.9583	1.1945	0.8541	0.865	0.8465	0.6579		100	100	100	100	100	100	100	100		N-acetylalanine	Amino acid	Aspartate family (OAA derived)	1110
	131	379	33942	Amino acid	Aspartate family (OAA derived)	N-acetylasparagine		0.88	1.35	0.48	0.59	0.55	0.7		0.15	0.0262	0.0274	0.0117	0.0017	0.0008	0.004	0.0012	0.0012	0.0009	0.0122	0.0052		0.973	1.4465	1.284	0.6349	1.1884	1.0009	0.8557	0.7008		100	100	100	100	100	100	100	100		N-acetylasparagine	Amino acid	Aspartate family (OAA derived)	100001257
	132	380	22185	Amino acid	Aspartate family (OAA derived)	N-acetylaspartate (NAA)		1.84	0.95	1.36	0.91	1.65	1.35		0.0029	0.0012	0.667	0.1503	0.0975	0.023	0.408	0.0588	0.0181	0.0066	0.0984	0.0306		0.7443	0.882	0.7238	1.4476	1.3209	0.8891	1.3716	1.1965		100	100	100	100	100	100	100	100		N-acetylaspartate (NAA)	Amino acid	Aspartate family (OAA derived)	100000787
	133	382	37432	Amino acid	Aspartate family (OAA derived)	N-acetyl-beta-alanine		3.97	2.21	2.66	1.68	3.01	2.28		9.8959e-06	3.0843e-05	0.0007	0.0008	2.3791e-06	4.467e-05	0.0024	0.0008	2.0701e-06	1.9429e-05	6.3038e-06	3.756e-05		0.8823	0.7323	0.6462	1.5806	1.1556	0.8522	3.5007	1.9443		100	100	100	100	100	100	100	100		N-acetyl-beta-alanine	Amino acid	Aspartate family (OAA derived)	100002102
	134	391	1589	Amino acid	Aspartate family (OAA derived)	N-acetylmethionine		1.03	0.91	0.46	0.6	0.52	0.59		0.8378	0.1135	0.3052	0.0825	0.0001	0.0002	0.0014	0.0006	0.0005	0.0005	0.001	0.0008		0.7641	1.5145	1.3301	0.8631	1.1537	1.173	0.7847	0.6904		100	100	100	100	100	100	100	100		N-acetylmethionine	Amino acid	Aspartate family (OAA derived)	1083
	136	404	2829	Amino acid	Aspartate family (OAA derived)	N-formylmethionine		0.85	0.69	0.49	0.51	0.68	0.71		0.1798	0.0303	0.0126	0.0061	0.0001	0.0001	1.6634e-05	2.7746e-05	0.0146	0.0055	0.007	0.0034		1.0778	1.1619	0.8409	1.3284	1.1188	0.7966	0.9113	0.5689		100	100	100	100	100	100	100	100		N-formylmethionine	Amino acid	Aspartate family (OAA derived)	194
	157	414	47101	Amino acid	Aspartate family (OAA derived)	N-methylpipecolate		2	5.84	2	7.24	2.3	7.14		0.0004	0.0003	1.3229e-07	7.4215e-06	0.0003	0.0002	2.0604e-06	1.3588e-05	1.5575e-05	6.3318e-05	4.0983e-06	2.6603e-05		1.2091	1.1015	0.9583	0.4145	0.3039	0.3083	2.4188	2.2011		100	100	100	100	100	100	100	100		N-methylpipecolate	Amino acid	Aspartate family (OAA derived)	100005383
	138	455	1444	Amino acid	Aspartate family (OAA derived)	pipecolate		7.07	10.44	3.89	6.28	3.64	6.37		4.7574e-06	2.0061e-05	1.8932e-06	1.9311e-05	6.3363e-06	4.467e-05	1.4046e-05	2.5233e-05	4.6912e-07	9.9171e-06	8.5293e-05	0.0002		0.8812	1.17	1.2528	0.5969	0.7259	0.7152	6.2287	4.556		100	100	100	100	100	100	100	100		pipecolate	Amino acid	Aspartate family (OAA derived)	1025
	141	478	1495	Amino acid	Aspartate family (OAA derived)	saccharopine		13.13	4.66	4.92	4.4	2.3	4.9		6.6857e-07	8.3402e-06	0.0002	0.0004	3.1494e-05	7.9702e-05	0.0001	0.0001	0.0006	0.0006	1.733e-05	7.2663e-05		0.329	0.9284	1.9878	0.9276	1.0381	0.9328	4.3206	4.5721		100	100	100	100	100	100	100	100		saccharopine	Amino acid	Aspartate family (OAA derived)	392
	142	479	42382	Amino acid	Aspartate family (OAA derived)	S-adenosylhomocysteine (SAH)		0.4	0.46	0.19	0.38	0.28	0.61		0.0004	0.0003	0.0008	0.0008	0.0011	0.0006	0.0053	0.0015	0.0024	0.0015	0.0417	0.015		2.4133	1.6058	1.0837	2.0593	0.7872	0.4925	0.9535	0.2992		100	100	100	100	100	100	100	100		S-adenosylhomocysteine (SAH)	Amino acid	Aspartate family (OAA derived)	197
	143	480	15915	Amino acid	Aspartate family (OAA derived)	S-adenosylmethionine (SAM)		3.28	1.89	0.43	0.51	0.44	0.48		0.0004	0.0003	0.0038	0.0024	0.0009	0.0005	0.0001	9.8745e-05	9.3292e-05	0.0001	0.0002	0.0003		0.2206	1.6574	1.6059	0.3824	1.3945	1.5014	0.7235	0.7136		100	100	100	100	100	100	100	100		S-adenosylmethionine (SAM)	Amino acid	Aspartate family (OAA derived)	1263
	160	490	38127	Amino acid	Aspartate family (OAA derived)	S-methylmethionine		2.99	0.87	1.41	0.71	0.87	0.52		0.0071	0.0024	0.2673	0.0746	0.0594	0.0147	0.0045	0.0014	0.3567	0.0845	0.0004	0.0005		0.2085	0.8193	1.3314	0.7198	1.6252	2.2389	0.6236	1.1543		100	100	100	100	100	100	100	100		S-methylmethionine	Amino acid	Aspartate family (OAA derived)	100002183
	144	508	1284	Amino acid	Aspartate family (OAA derived)	threonine		2.42	1.1	1.56	0.8	1.04	0.66		3.8648e-05	6.2966e-05	0.2088	0.0602	0.0027	0.0012	0.0144	0.0033	0.5658	0.1258	0.0006	0.0006		0.3696	0.7816	1.1705	0.8137	1.5177	1.8569	0.8939	1.2212		100	100	100	100	100	100	100	100		threonine	Amino acid	Aspartate family (OAA derived)	564
	249	325	1125	Amino acid	Branched Chain Amino Acids (OAA derived)	isoleucine		3.47	1.31	1.64	1.07	1.27	1.06		0.0001	0.0001	0.102	0.0331	0.002	0.0009	0.4578	0.0653	0.0191	0.0069	0.4336	0.1065		0.2798	0.7736	0.9994	0.7429	1.1864	1.1893	0.9716	1.2659		100	100	100	100	100	100	100	100		isoleucine	Amino acid	Branched Chain Amino Acids (OAA derived)	376
	263	86	38276	Amino acid	Branched Chain Amino Acids (pyruvate derived)	2,3-dihydroxyisovalerate		0.57	0.59	0.17	0.2	0.14	0.21		0.0009	0.0005	0.0054	0.0032	8.6721e-06	4.5049e-05	0.0002	0.0001	3.9406e-06	2.6327e-05	3.2202e-05	9.3475e-05		0.8273	1.4553	1.6907	0.79	1.2482	1.1387	0.4698	0.2445		100	100	100	100	100	100	100	100		2,3-dihydroxyisovalerate	Amino acid	Branched Chain Amino Acids (pyruvate derived)	100002417
	266	98	36746	Amino acid	Branched Chain Amino Acids (pyruvate derived)	2-hydroxy-3-methylvalerate		3.49	0.69	0.62	0.47	1.58	1.66		0.004	0.0015	0.1605	0.048	0.0132	0.0039	0.005	0.0015	0.0369	0.0116	0.0122	0.0052		0.9187	1.103	0.4349	4.6288	1.4591	0.4122	3.2094	0.6861		100	100	100	100	100	75	100	100		2-hydroxy-3-methylvalerate	Amino acid	Branched Chain Amino Acids (pyruvate derived)	100001541
	287	106	15667	Amino acid	Branched Chain Amino Acids (pyruvate derived)	2-isopropylmalate		0.47	0.44	0.32	0.28	0.44	0.35		5.0665e-05	7.5666e-05	6.5127e-05	0.0002	0.0165	0.0047	0.0131	0.0031	0.0382	0.0119	0.0187	0.0076		1.4538	1.0161	0.7532	1.5579	1.1585	0.9487	0.6856	0.3292		100	100	100	100	100	100	100	100		2-isopropylmalate	Amino acid	Branched Chain Amino Acids (pyruvate derived)	100000409
	268	122	1549	Amino acid	Branched Chain Amino Acids (pyruvate derived)	3-hydroxyisobutyrate		2.73	0.95	1.61	0.65	1.88	0.88		8.5801e-05	0.0001	0.5034	0.1209	0.0027	0.0012	0.0017	0.0006	0.0039	0.0022	0.4028	0.1002		0.5949	0.5838	0.498	1.7129	1.4323	1.0654	1.6229	0.9373		100	100	100	100	100	100	100	100		3-hydroxyisobutyrate	Amino acid	Branched Chain Amino Acids (pyruvate derived)	111
	269	124	44526	Amino acid	Branched Chain Amino Acids (pyruvate derived)	3-methyl-2-oxobutyrate		1.48	0.71	0.52	0.51	0.76	0.84		0.0054	0.0019	0.0517	0.0192	0.0001	0.0001	6.7175e-06	2.1202e-05	0.0002	0.0002	0.021	0.0083		0.8553	1.1123	0.7648	1.782	1.138	0.6868	1.262	0.5799		100	100	100	100	100	100	100	100		3-methyl-2-oxobutyrate	Amino acid	Branched Chain Amino Acids (pyruvate derived)	100000936
	270	125	15676	Amino acid	Branched Chain Amino Acids (pyruvate derived)	3-methyl-2-oxovalerate		3.72	0.67	0.57	0.39	0.81	0.75		0.0003	0.0002	0.0299	0.0124	0.0003	0.0002	6.0409e-05	6.7852e-05	0.0427	0.013	0.0081	0.0038		0.4417	1.1514	0.8086	2.4433	1.6607	0.8649	1.6435	0.6513		100	100	100	100	100	100	100	100		3-methyl-2-oxovalerate	Amino acid	Branched Chain Amino Acids (pyruvate derived)	100000036
	297	127	38667	Amino acid	Branched Chain Amino Acids (pyruvate derived)	3-methylglutaconate		1.58	1	0.85	0.63	0.79	0.82		0.4232	0.0623	0.6943	0.1551	0.3298	0.0694	0.1761	0.0286	0.3003	0.0725	0.3182	0.0832		0.5354	1.1668	1.2576	0.8447	1.5712	1.2124	0.8476	0.9939		100	100	100	100	100	100	100	25		3-methylglutaconate	Amino acid	Branched Chain Amino Acids (pyruvate derived)	100002458
	271	140	22116	Amino acid	Branched Chain Amino Acids (pyruvate derived)	4-methyl-2-oxopentanoate		1.51	0.65	0.49	0.46	0.65	0.73		0.0024	0.001	0.0065	0.0037	0.0006	0.0004	5.9281e-05	6.7852e-05	0.0019	0.0013	0.0052	0.0028		0.6881	1.3474	1.0136	1.5967	1.4258	0.9076	1.0411	0.6608		100	100	100	100	100	100	100	100		4-methyl-2-oxopentanoate	Amino acid	Branched Chain Amino Acids (pyruvate derived)	100000551
	274	171	22132	Amino acid	Branched Chain Amino Acids (pyruvate derived)	alpha-hydroxyisocaproate		0.76	0.34	0.58	0.6	1.01	1.06		0.3601	0.054	0.0009	0.0009	0.0179	0.0051	0.0679	0.0126	0.9258	0.1864	0.391	0.098		1.012	0.9713	0.5581	2.2783	0.9349	0.5297	0.7741	0.5628		100	100	25	100	100	0	100	25		alpha-hydroxyisocaproate	Amino acid	Branched Chain Amino Acids (pyruvate derived)	100000706
	275	172	46537	Amino acid	Branched Chain Amino Acids (pyruvate derived)	alpha-hydroxyisovalerate		2	1.55	1.75	1.36	2.32	2.31		0.0122	0.0035	0.0578	0.0212	0.0003	0.0002	0.0052	0.0015	0.0019	0.0013	2.6565e-05	8.1437e-05		1.4992	0.688	0.5189	1.9253	0.8873	0.5226	2.9924	1.2057		100	100	100	100	100	100	100	100		alpha-hydroxyisovalerate	Amino acid	Branched Chain Amino Acids (pyruvate derived)	100001300
	276	188	12129	Amino acid	Branched Chain Amino Acids (pyruvate derived)	beta-hydroxyisovalerate		8.04	2.06	4.47	1.44	5.42	2.38		1.9693e-05	4.4116e-05	0.003	0.0021	1.1676e-05	4.931e-05	0.0075	0.002	7.4245e-06	4.1304e-05	8.6089e-05	0.0002		0.5219	0.4077	0.3359	2.0406	1.265	0.7644	4.1937	1.8217		100	100	100	100	100	100	100	100		beta-hydroxyisovalerate	Amino acid	Branched Chain Amino Acids (pyruvate derived)	1442
	277	332	60	Amino acid	Branched Chain Amino Acids (pyruvate derived)	leucine		2.19	1.44	1.66	1.12	1.22	0.96		1.7278e-05	4.2711e-05	0.0295	0.0123	0.0026	0.0011	0.1923	0.031	0.0358	0.0113	0.5968	0.1402		0.3515	0.8382	1.1372	0.533	1.2386	1.4435	0.7682	1.3881		100	100	100	100	100	100	100	100		leucine	Amino acid	Branched Chain Amino Acids (pyruvate derived)	397
	280	360	15745	Amino acid	Branched Chain Amino Acids (pyruvate derived)	methylsuccinate		5.77	4.85	2.28	2.02	1.55	1.69		1.7998e-06	9.9249e-06	1.8963e-05	0.0001	6.1239e-05	0.0001	9.5429e-05	8.6224e-05	0.0011	0.0009	0.0005	0.0005		0.2796	0.807	1.1905	0.3324	0.9107	1.0888	1.6131	1.8434		100	100	100	100	100	100	100	100		methylsuccinate	Amino acid	Branched Chain Amino Acids (pyruvate derived)	2051
	281	389	33967	Amino acid	Branched Chain Amino Acids (pyruvate derived)	N-acetylisoleucine		1.95	1.32	3.21	3.59	3.59	2.33		0.6029	0.0854	0.9115	0.1915	0.0902	0.0215	0.0755	0.0138	0.0755	0.0211	0.1855	0.0524		0.7612	0.4361	0.3895	1.124	0.3895	0.6009	1.4824	1.3991		75	25	0	100	0	50	50	75		N-acetylisoleucine	Amino acid	Branched Chain Amino Acids (pyruvate derived)	100001276
	282	390	1587	Amino acid	Branched Chain Amino Acids (pyruvate derived)	N-acetylleucine		1.27	1.24	0.73	1.4	1.46	1.46		0.6952	0.097	0.7375	0.1625	0.0969	0.0229	0.1188	0.0203	0.0958	0.0259	0.0958	0.03		0.8234	1.1109	0.5578	0.8426	0.5796	0.5578	1.0429	0.8127		75	100	25	75	50	0	50	75		N-acetylleucine	Amino acid	Branched Chain Amino Acids (pyruvate derived)	1082
	283	399	1591	Amino acid	Branched Chain Amino Acids (pyruvate derived)	N-acetylvaline		0.87	0.85	0.36	0.72	0.61	1.32		0.3994	0.0593	0.3401	0.0896	0.0025	0.0011	0.1956	0.0314	0.141	0.0373	0.1884	0.0531		1.0922	1.8511	1.1002	1.1209	0.9243	0.5067	0.9498	0.6688		100	100	100	100	100	50	100	100		N-acetylvaline	Amino acid	Branched Chain Amino Acids (pyruvate derived)	1084
	286	536	1649	Amino acid	Branched Chain Amino Acids (pyruvate derived)	valine		3.45	1.31	1.54	0.92	0.99	0.8		0.0002	0.0001	0.1502	0.0453	0.015	0.0043	0.5334	0.0752	0.9084	0.1832	0.1003	0.0311		0.2461	0.8361	1.2905	0.6467	1.4004	1.5974	0.8493	1.2839		100	100	100	100	100	100	100	100		valine	Amino acid	Branched Chain Amino Acids (pyruvate derived)	566
	220	39	30460	Amino acid	Glutamate family (alpha-ketoglutarate derived)	1-methylhistidine		2.65	6.43	2.74	6.45	2.74	4.78		0.0042	0.0016	2.9291e-06	2.3476e-05	0.0011	0.0006	2.2463e-07	5.2459e-06	0.0036	0.002	8.9108e-06	4.5853e-05		1.0776	1.039	1.0405	0.4431	0.4413	0.5949	2.851	2.8464		100	100	100	100	100	100	100	100		1-methylhistidine	Amino acid	Glutamate family (alpha-ketoglutarate derived)	100001051
	176	129	15677	Amino acid	Glutamate family (alpha-ketoglutarate derived)	3-methylhistidine		1.57	2.3	1.41	2.02	1.5	2.13		0.0057	0.002	0.001	0.001	0.0348	0.0089	0.0002	0.0001	0.0075	0.0034	0.0002	0.0003		1.2297	1.1628	1.0872	0.8406	0.8094	0.7666	1.9301	1.6355		100	100	100	100	100	100	100	100		3-methylhistidine	Amino acid	Glutamate family (alpha-ketoglutarate derived)	100000042
	177	132	1558	Amino acid	Glutamate family (alpha-ketoglutarate derived)	4-acetamidobutanoate		1.61	1.2	1.05	0.92	1.24	1.19		0.0073	0.0025	0.1428	0.0438	0.6174	0.12	0.4103	0.059	0.073	0.0204	0.0741	0.024		1.0952	0.8947	0.7557	1.4676	1.0257	0.7863	1.7596	0.9387		100	100	100	100	100	100	100	100		4-acetamidobutanoate	Amino acid	Glutamate family (alpha-ketoglutarate derived)	1113
	229	133	15681	Amino acid	Glutamate family (alpha-ketoglutarate derived)	4-guanidinobutanoate		0.61	0.82	0.67	0.85	0.68	0.76		0.003	0.0012	0.0683	0.0242	0.0177	0.005	0.2159	0.0342	0.0191	0.0069	0.0494	0.017		0.9677	1.2876	1.283	0.728	1.0246	1.1365	0.5951	0.8668		100	100	100	100	100	100	100	100		4-guanidinobutanoate	Amino acid	Glutamate family (alpha-ketoglutarate derived)	100000096
	231	139	32349	Amino acid	Glutamate family (alpha-ketoglutarate derived)	4-imidazoleacetate		1.46	0.73	1.54	0.96	1.45	1		0.0119	0.0035	0.0265	0.0114	0.0007	0.0004	0.7413	0.1007	0.0024	0.0015	0.9586	0.206		0.5839	0.8951	0.9469	1.1624	1.427	1.3776	0.8536	1.3744		100	100	100	100	100	100	100	100		4-imidazoleacetate	Amino acid	Glutamate family (alpha-ketoglutarate derived)	100001207
	182	178	1638	Amino acid	Glutamate family (alpha-ketoglutarate derived)	arginine		1.35	0.93	0.65	0.46	0.42	0.33		0.0592	0.0128	0.4759	0.1164	0.0045	0.0017	9.5435e-06	2.3056e-05	1.9998e-06	1.9429e-05	8.4598e-07	1.5962e-05		0.2864	1.291	1.9736	0.4172	1.8088	2.551	0.387	0.8374		100	100	100	100	100	100	100	100		arginine	Amino acid	Glutamate family (alpha-ketoglutarate derived)	231
	184	198	40007	Amino acid	Glutamate family (alpha-ketoglutarate derived)	carboxyethyl-GABA		2.11	1.72	1.65	1.36	1.85	1.69		5.2951e-06	2.1088e-05	0.0003	0.0005	0.0001	0.0001	0.0003	0.0002	1.1468e-05	5.3914e-05	0.0002	0.0003		0.9761	0.8218	0.7329	1.196	0.9986	0.803	2.0583	1.3571		100	100	100	100	100	100	100	100		carboxyethyl-GABA	Amino acid	Glutamate family (alpha-ketoglutarate derived)	100003260
	185	204	2132	Amino acid	Glutamate family (alpha-ketoglutarate derived)	citrulline		1.22	1.11	1.24	0.67	0.92	0.68		0.1397	0.0247	0.5059	0.1213	0.0289	0.0076	0.413	0.0592	0.5864	0.1294	0.1951	0.0547		0.8839	0.8368	1.1229	0.9717	1.5536	1.5246	1.0813	1.0365		100	100	100	100	100	100	100	100		citrulline	Amino acid	Glutamate family (alpha-ketoglutarate derived)	391
	187	229	36808	Amino acid	Glutamate family (alpha-ketoglutarate derived)	dimethylarginine (SDMA + ADMA)		1.16	0.99	0.73	0.68	0.67	0.51		0.853	0.1149	0.5745	0.1329	0.1178	0.0272	0.0546	0.0104	0.0534	0.0158	0.0091	0.0041		0.6053	1.1441	1.2526	0.7094	1.2321	1.6379	0.7009	0.8347		100	100	100	100	100	100	100	100		dimethylarginine (SDMA + ADMA)	Amino acid	Glutamate family (alpha-ketoglutarate derived)	100001810
	188	235	37459	Amino acid	Glutamate family (alpha-ketoglutarate derived)	ergothioneine		0.96	2.72	0.94	2.52	0.97	2.72		0.8057	0.1096	4.8016e-06	3.3672e-05	0.6117	0.1191	3.6076e-05	4.8605e-05	0.798	0.1644	2.6791e-05	8.1437e-05		1.2575	1.1394	1.1066	0.4427	0.4245	0.3928	1.203	1.0682		100	100	100	100	100	100	100	100		ergothioneine	Amino acid	Glutamate family (alpha-ketoglutarate derived)	100002154
	189	255	1416	Amino acid	Glutamate family (alpha-ketoglutarate derived)	gamma-aminobutyrate (GABA)		0.69	0.68	0.47	0.53	0.53	0.61		1.6086e-06	9.6092e-06	6.9836e-05	0.0002	0.0011	0.0006	0.0006	0.0003	0.0011	0.0009	0.0026	0.0016		1.0191	1.1468	1.012	1.0255	1.0163	0.8819	0.7023	0.5398		100	100	100	100	100	100	100	100		gamma-aminobutyrate (GABA)	Amino acid	Glutamate family (alpha-ketoglutarate derived)	141
	190	279	57	Amino acid	Glutamate family (alpha-ketoglutarate derived)	glutamate		0.82	0.61	0.81	0.71	0.87	0.98		0.004	0.0015	0.0005	0.0006	0.0108	0.0034	0.0037	0.0012	0.0071	0.0033	0.6739	0.1529		0.9842	1.0893	1.0072	1.3293	1.233	0.8978	0.8091	0.8809		100	100	100	100	100	100	100	100		glutamate	Amino acid	Glutamate family (alpha-ketoglutarate derived)	561
	191	280	33487	Amino acid	Glutamate family (alpha-ketoglutarate derived)	glutamate, gamma-methyl ester		0.64	0.83	0.59	0.86	0.42	0.89		0.0092	0.0029	0.1368	0.0424	4.2636e-05	9.5639e-05	0.0313	0.0065	0.0001	0.0002	0.3934	0.0983		1.2066	1.355	1.9333	0.9362	0.9322	0.9054	0.774	0.8056		100	100	100	100	100	100	100	100		glutamate, gamma-methyl ester	Amino acid	Glutamate family (alpha-ketoglutarate derived)	100001103
	192	281	53	Amino acid	Glutamate family (alpha-ketoglutarate derived)	glutamine		0.35	0.72	0.16	0.28	0.12	0.23		0.0002	0.0002	0.029	0.0123	7.6996e-06	4.5049e-05	1.6312e-06	1.2698e-05	3.073e-07	9.9171e-06	6.8245e-07	1.5962e-05		0.8491	1.8263	2.5097	0.41	1.069	1.3143	0.2958	0.2984		100	100	100	100	100	100	100	100		glutamine	Amino acid	Glutamate family (alpha-ketoglutarate derived)	563
	194	306	59	Amino acid	Glutamate family (alpha-ketoglutarate derived)	histidine		0.74	0.32	0.61	0.42	0.49	0.38		0.011	0.0033	2.2398e-06	2.0943e-05	0.0018	0.0009	0.0009	0.0004	0.0008	0.0007	0.0004	0.0005		0.4661	0.9168	1.1482	1.0772	1.3232	1.4547	0.3448	0.5596		100	100	100	100	100	100	100	100		histidine	Amino acid	Glutamate family (alpha-ketoglutarate derived)	355
	196	309	22138	Amino acid	Glutamate family (alpha-ketoglutarate derived)	homocitrulline		1.43	1.85	1.76	3.11	1.71	3.27		0.0541	0.0119	0.0018	0.0015	0.0057	0.002	2.0256e-07	5.2459e-06	0.0041	0.0022	1.6824e-08	1.9046e-06		1.1783	1.1003	1.1351	0.9109	0.6233	0.5917	1.6809	1.9375		100	100	100	100	100	100	100	100		homocitrulline	Amino acid	Glutamate family (alpha-ketoglutarate derived)	100000963
	218	316	40730	Amino acid	Glutamate family (alpha-ketoglutarate derived)	imidazole propionate		1.44	1.73	1.09	0.84	0.98	0.88		0.2101	0.0346	0.0849	0.0289	0.4683	0.0953	0.386	0.0563	0.7796	0.1619	0.1689	0.0485		0.6159	0.9945	1.1052	0.5147	1.2935	1.2363	0.8893	1.0845		100	100	100	100	100	100	100	100		imidazole propionate	Amino acid	Glutamate family (alpha-ketoglutarate derived)	100003434
	197	378	33953	Amino acid	Glutamate family (alpha-ketoglutarate derived)	N-acetylarginine		0.63	0.52	0.39	0.4	0.53	0.48		0.0753	0.015	0.0367	0.0145	0.0089	0.0029	0.0113	0.0027	0.0238	0.0082	0.0169	0.0069		0.9029	1.2563	0.9311	1.0909	1.2407	1.0238	0.5677	0.4952		100	100	100	100	100	100	100	100		N-acetylarginine	Amino acid	Glutamate family (alpha-ketoglutarate derived)	100001266
	198	387	15720	Amino acid	Glutamate family (alpha-ketoglutarate derived)	N-acetylglutamate		0.54	0.74	0.64	0.88	1.31	1.38		0.0008	0.0005	0.0124	0.0061	0.005	0.0018	0.2365	0.0371	0.0668	0.0189	0.0246	0.0094		4.4553	1.1737	0.5711	3.2706	0.8501	0.5416	2.4263	0.75		100	100	100	100	100	100	100	100		N-acetylglutamate	Amino acid	Glutamate family (alpha-ketoglutarate derived)	100000282
	199	388	33943	Amino acid	Glutamate family (alpha-ketoglutarate derived)	N-acetylglutamine		0.39	1.13	0.21	0.42	0.28	0.5		0.0017	0.0008	0.1467	0.0446	7.3604e-05	0.0001	0.0002	0.0001	0.0019	0.0012	0.001	0.0008		3.1505	1.2828	0.9468	1.0899	0.6365	0.5407	1.2324	0.2687		100	100	100	100	100	100	100	100		N-acetylglutamine	Amino acid	Glutamate family (alpha-ketoglutarate derived)	100001253
	202	394	34387	Amino acid	Glutamate family (alpha-ketoglutarate derived)	N-acetylproline		4.94	4.35	3.97	3.97	6.95	5.28		0.0081	0.0027	0.0005	0.0006	0.0102	0.0032	0.0059	0.0016	0.0024	0.0015	0.0007	0.0006		1.1481	0.761	0.4341	1.3041	0.76	0.5714	5.672	3.0182		100	100	100	100	100	100	100	100		N-acetylproline	Amino acid	Glutamate family (alpha-ketoglutarate derived)	100001334
	224	402	43249	Amino acid	Glutamate family (alpha-ketoglutarate derived)	N-delta-acetylornithine		0.77	0.87	0.92	1.48	0.67	1.14		0.0287	0.0071	0.0343	0.0139	0.5773	0.1137	0.0288	0.006	0.1634	0.0422	0.4651	0.1123		0.9545	1.3713	1.8754	0.8515	0.8517	1.1035	0.7394	1.2608		100	100	100	100	100	75	100	100		N-delta-acetylornithine	Amino acid	Glutamate family (alpha-ketoglutarate derived)	100004523
	216	413	31532	Amino acid	Glutamate family (alpha-ketoglutarate derived)	N-methylglutamate		1.44	1.14	0.75	0.74	0.83	0.98		0.022	0.0056	0.3059	0.0825	0.0154	0.0044	0.0011	0.0005	0.0414	0.0127	0.9588	0.206		1.0886	0.9938	0.9063	1.3805	1.012	0.765	1.5675	0.7481		100	100	100	100	100	100	100	100		N-methylglutamate	Amino acid	Glutamate family (alpha-ketoglutarate derived)	100001131
	211	415	37431	Amino acid	Glutamate family (alpha-ketoglutarate derived)	N-methylproline		2.84	1.96	2.41	2.04	2.69	2.34		7.5325e-07	8.3402e-06	0.0002	0.0004	0.0001	0.0001	0.0003	0.0002	7.9955e-05	0.0001	0.0008	0.0007		0.8028	0.8821	0.7923	1.1656	1.0415	0.9118	2.2836	2.1297		100	100	100	100	100	100	100	100		N-methylproline	Amino acid	Glutamate family (alpha-ketoglutarate derived)	100001956
	228	416	43586	Amino acid	Glutamate family (alpha-ketoglutarate derived)	N-monomethylarginine		0.68	0.52	0.62	0.53	0.44	0.41		0.0444	0.01	0.0114	0.0057	0.0005	0.0003	5.4043e-06	1.8931e-05	2.6575e-07	9.9171e-06	1.0543e-05	4.9592e-05		0.577	1.2513	1.7567	0.7527	1.4687	1.8693	0.3901	0.7742		100	100	100	100	100	100	100	100		N-monomethylarginine	Amino acid	Glutamate family (alpha-ketoglutarate derived)	100004488
	203	427	1493	Amino acid	Glutamate family (alpha-ketoglutarate derived)	ornithine		1.43	1.38	1.29	1.29	0.68	0.9		0.0828	0.0161	0.1002	0.0327	0.1117	0.0259	0.0999	0.0173	0.0255	0.0086	0.3413	0.0886		0.6723	0.984	1.8483	0.6937	0.9772	1.4081	0.9599	1.2654		100	100	100	100	100	100	100	100		ornithine	Amino acid	Glutamate family (alpha-ketoglutarate derived)	444
	205	457	1898	Amino acid	Glutamate family (alpha-ketoglutarate derived)	proline		4.93	6.3	3.96	6.37	3.63	6.18		0.0003	0.0002	0.0004	0.0005	0.0006	0.0004	0.0002	0.0001	0.0005	0.0006	0.0001	0.0002		0.8565	1.114	1.2172	0.6705	0.6929	0.7144	4.2214	4.4147		100	100	100	100	100	100	100	100		proline	Amino acid	Glutamate family (alpha-ketoglutarate derived)	480
	206	467	46225	Amino acid	Glutamate family (alpha-ketoglutarate derived)	pyroglutamine*		5.81	18.51	3.98	11.61	2.99	10.3		0.0005	0.0003	6.1821e-06	4.0803e-05	8.7447e-05	0.0001	1.2254e-05	2.4092e-05	0.0001	0.0002	3.1004e-06	2.5639e-05		0.6795	1.6248	2.1655	0.2134	0.5572	0.628	3.9506	6.471		100	100	100	100	100	100	100	100		pyroglutamine*	Amino acid	Glutamate family (alpha-ketoglutarate derived)	100001540
	208	494	34384	Amino acid	Glutamate family (alpha-ketoglutarate derived)	stachydrine		5.6	7.75	2.83	4.23	2.52	4.62		0.0003	0.0002	0.0005	0.0006	0.0026	0.0011	0.0012	0.0005	0.0054	0.0026	0.0004	0.0004		0.8978	1.2168	1.367	0.6484	0.8156	0.7472	5.0272	3.4489		100	100	100	100	100	100	100	100		stachydrine	Amino acid	Glutamate family (alpha-ketoglutarate derived)	100001296
	210	512	32306	Amino acid	Glutamate family (alpha-ketoglutarate derived)	trans-4-hydroxyproline		3.41	4.36	1.49	2.2	1.66	3.73		0.0045	0.0017	0.0015	0.0013	0.163	0.0369	0.0202	0.0044	0.2114	0.052	0.0034	0.002		0.5257	1.1109	0.9998	0.4113	0.7531	0.4441	1.7921	1.6586		100	100	50	50	100	25	100	100		trans-4-hydroxyproline	Amino acid	Glutamate family (alpha-ketoglutarate derived)	1001
	213	513	607	Amino acid	Glutamate family (alpha-ketoglutarate derived)	trans-urocanate		1.84	1.25	1.55	1	1.18	0.95		0.0855	0.0165	0.2151	0.0617	0.0241	0.0065	0.9408	0.1241	0.3171	0.0762	0.638	0.1471		0.5312	0.7695	1.0144	0.7835	1.1975	1.2512	0.9784	1.1921		100	100	100	100	100	100	100	100		trans-urocanate	Amino acid	Glutamate family (alpha-ketoglutarate derived)	537
	319	146	1494	Amino acid	Glutathione metabolism	5-oxoproline		0.52	0.75	0.32	0.53	0.28	0.43		0.0003	0.0002	0.0026	0.0019	4.1158e-05	9.4471e-05	0.0011	0.0005	6.1292e-05	0.0001	0.0004	0.0005		1.0642	1.6338	1.9088	0.7376	0.9913	1.2372	0.5538	0.5267		100	100	100	100	100	100	100	100		5-oxoproline	Amino acid	Glutathione metabolism	1021
	320	209	35159	Amino acid	Glutathione metabolism	cysteine-glutathione disulfide		0.59	0.56	0.5	0.51	0.3	0.39		0.0008	0.0005	0.0003	0.0005	0.0006	0.0004	0.0007	0.0004	3.6059e-05	8.8639e-05	0.0005	0.0006		0.9288	1.0779	1.8077	0.981	1.0501	1.365	0.5457	0.5369		100	100	100	100	100	100	100	100		cysteine-glutathione disulfide	Amino acid	Glutathione metabolism	100001437
	330	256	37063	Amino acid	Glutathione metabolism	gamma-glutamylalanine		1.19	1.29	0.4	0.63	0.47	1.13		0.2241	0.0367	0.0968	0.0319	0.0003	0.0002	0.0085	0.0022	0.0009	0.0008	0.331	0.0863		0.9486	2.1491	1.8326	0.8786	1.3598	0.758	1.1313	0.86		100	100	100	100	100	100	100	100		gamma-glutamylalanine	Amino acid	Glutathione metabolism	100001843
	331	259	36738	Amino acid	Glutathione metabolism	gamma-glutamylglutamate		0.54	0.52	0.44	0.69	0.68	0.93		0.0017	0.0008	0.0003	0.0005	0.0002	0.0002	0.0025	0.0009	0.0098	0.0041	0.4481	0.1091		1.749	1.5386	0.9887	1.8404	0.9723	0.7228	0.951	0.6755		100	100	100	100	100	100	100	100		gamma-glutamylglutamate	Amino acid	Glutathione metabolism	331
	332	260	2730	Amino acid	Glutathione metabolism	gamma-glutamylglutamine		0.42	0.77	0.09	0.31	0.17	0.64		0.005	0.0018	0.1155	0.0369	0.0002	0.0002	0.0002	0.0002	3.8173e-05	9.138e-05	0.0003	0.0004		1.7145	3.8105	2.1299	0.9429	1.1543	0.5641	0.7221	0.3594		100	100	100	100	100	100	100	100		gamma-glutamylglutamine	Amino acid	Glutathione metabolism	1140
	333	261	33949	Amino acid	Glutathione metabolism	gamma-glutamylglycine		0.82	0.93	0.51	0.82	0.62	1.11		0.0293	0.0071	0.4715	0.116	0.0032	0.0013	0.1638	0.0269	0.0104	0.0043	0.4651	0.1123		1.1858	1.4812	1.2089	1.039	0.9179	0.6812	0.9694	0.7532		100	100	100	100	100	100	100	100		gamma-glutamylglycine	Amino acid	Glutathione metabolism	100001294
	335	263	34456	Amino acid	Glutathione metabolism	gamma-glutamylisoleucine*		4.86	1.23	1.48	1.08	2.19	1.88		9.6739e-05	0.0001	0.3017	0.082	0.0416	0.0106	0.6608	0.091	0.0048	0.0025	0.0069	0.0034		0.3954	0.93	0.6276	1.5687	1.274	0.7295	1.9234	1.3749		100	100	100	100	100	100	100	100		gamma-glutamylisoleucine*	Amino acid	Glutathione metabolism	100001485
	336	264	18369	Amino acid	Glutathione metabolism	gamma-glutamylleucine		3.29	1.7	1.26	1.38	1.36	1.7		0.0006	0.0004	0.0088	0.0047	0.0091	0.0029	0.0022	0.0008	0.0099	0.0042	0.0028	0.0017		0.323	1.1148	1.0323	0.6244	1.014	0.8248	1.0633	1.4006		100	100	100	100	100	100	100	100		gamma-glutamylleucine	Amino acid	Glutathione metabolism	1268
	338	265	44872	Amino acid	Glutathione metabolism	gamma-glutamylmethionine		5.26	2.4	1.32	1.81	1.86	3.33		0.0013	0.0006	0.009	0.0048	0.146	0.0332	0.0187	0.0042	0.0118	0.0048	0.0009	0.0008		0.3363	1.3882	0.9854	0.7385	1.0179	0.5523	1.7699	1.8376		100	100	100	100	100	100	100	100		gamma-glutamylmethionine	Amino acid	Glutathione metabolism	100001313
	339	266	33422	Amino acid	Glutathione metabolism	gamma-glutamylphenylalanine		0.9	0.78	0.34	0.66	0.47	0.88		0.3349	0.0506	0.0346	0.0139	0.0022	0.001	0.0355	0.0072	0.006	0.0028	0.3182	0.0832		0.9229	2.0843	1.5372	1.0599	1.0775	0.8185	0.8296	0.7163		100	100	100	100	100	100	100	100		gamma-glutamylphenylalanine	Amino acid	Glutathione metabolism	100000491
	340	268	33364	Amino acid	Glutathione metabolism	gamma-glutamylthreonine		3.24	1.17	1.16	1.12	2.08	2.42		8.6634e-05	0.0001	0.1891	0.055	0.1356	0.031	0.1285	0.0216	5.4154e-05	0.0001	4.4857e-05	0.0001		0.526	1.0216	0.571	1.456	1.0593	0.492	1.7035	1.1896		100	100	100	100	100	100	100	100		gamma-glutamylthreonine	Amino acid	Glutathione metabolism	100001314
	341	269	33947	Amino acid	Glutathione metabolism	gamma-glutamyltryptophan		1.25	1	1.67	2.14	2.16	2.72		0.001	0.0005	0.9725	0.2036	0.001	0.0005	1.1327e-05	2.4092e-05	0.0001	0.0002	0.0002	0.0003		0.9894	1.0064	0.7773	1.234	0.785	0.6171	1.2325	1.6782		100	100	100	100	100	100	100	100		gamma-glutamyltryptophan	Amino acid	Glutathione metabolism	100001295
	342	270	2734	Amino acid	Glutathione metabolism	gamma-glutamyltyrosine		1.98	1.23	2.04	1.85	3.32	3.64		0.0028	0.0012	0.1077	0.0346	7.8001e-05	0.0001	0.0004	0.0002	0.0052	0.0026	1.9283e-06	2.3337e-05		0.7689	0.9426	0.5799	1.2364	1.0391	0.5275	1.5187	1.9226		100	100	100	100	100	100	100	100		gamma-glutamyltyrosine	Amino acid	Glutathione metabolism	1102
	343	271	43829	Amino acid	Glutathione metabolism	gamma-glutamylvaline		1.66	0.72	1.03	0.65	1.34	0.88		0.0101	0.0031	0.0493	0.0185	0.7498	0.1437	0.0025	0.0008	0.0138	0.0053	0.1714	0.049		0.832	0.9308	0.7178	1.9207	1.4634	1.0931	1.3805	0.9585		100	100	100	100	100	100	100	100		gamma-glutamylvaline	Amino acid	Glutathione metabolism	100001126
	322	284	27727	Amino acid	Glutathione metabolism	glutathione, oxidized (GSSG)		0.65	0.7	0.48	0.5	0.4	0.53		0.0082	0.0027	0.0072	0.004	0.0001	0.0001	0.0002	0.0001	4.965e-05	0.0001	0.0008	0.0007		1.077	1.1362	1.3441	0.9884	1.0814	1.0148	0.6959	0.5428		100	100	100	100	100	100	100	100		glutathione, oxidized (GSSG)	Amino acid	Glutathione metabolism	448
	323	285	2127	Amino acid	Glutathione metabolism	glutathione, reduced (GSH)		0.77	0.64	0.37	0.39	0.36	0.61		0.0229	0.0059	0.001	0.001	0.0012	0.0006	0.0053	0.0015	0.0002	0.0003	0.0077	0.0037		0.964	1.2027	1.2313	1.1606	1.1255	0.73	0.7416	0.4417		100	100	100	100	100	100	100	100		glutathione, reduced (GSH)	Amino acid	Glutathione metabolism	496
	324	426	34592	Amino acid	Glutathione metabolism	ophthalmate		7.11	1.73	4.67	1.04	4.85	1.46		1.8167e-05	4.341e-05	0.0005	0.0006	6.0551e-05	0.0001	0.7844	0.1055	1.1732e-05	5.3914e-05	0.0161	0.0066		0.2651	0.2709	0.2609	1.0873	1.2187	0.8678	1.8854	1.2641		100	75	100	100	100	100	100	100		ophthalmate	Amino acid	Glutathione metabolism	100001311
	325	489	33944	Amino acid	Glutathione metabolism	S-methylglutathione		0.59	0.39	0.73	0.54	0.68	0.58		0.0037	0.0014	0.0003	0.0005	0.091	0.0216	0.002	0.0007	0.0081	0.0036	0.0015	0.0011		1.278	0.8231	0.8912	1.9317	1.1192	1.0422	0.7604	0.6037		100	100	100	100	100	100	100	100		S-methylglutathione	Amino acid	Glutathione metabolism	100001259
	2	189	3141	Amino acid	Serine family (phosphoglycerate derived)	betaine		4.43	3.96	2.81	2.89	2.5	2.67		9.0095e-07	8.3402e-06	2.9276e-07	1.0003e-05	5.7586e-06	4.467e-05	4.5298e-07	6.3472e-06	6.2255e-07	1.0967e-05	7.3885e-07	1.5962e-05		0.5974	0.974	1.0934	0.668	0.9464	1.0243	2.6435	2.7335		100	100	100	100	100	100	100	100		betaine	Amino acid	Serine family (phosphoglycerate derived)	799
	4	208	1868	Amino acid	Serine family (phosphoglycerate derived)	cysteine		0.93	0.79	0.97	1.31	0.55	0.82		0.7676	0.105	0.1243	0.0394	0.8479	0.1597	0.1454	0.0241	0.0092	0.004	0.2013	0.0561		0.7053	1.288	2.2629	0.8258	0.9579	1.5296	0.6562	1.2506		100	100	100	100	100	100	100	100		cysteine	Amino acid	Serine family (phosphoglycerate derived)	800
	6	211	56	Amino acid	Serine family (phosphoglycerate derived)	cystine		1.93	1.19	0.25	0.56	0.1	0.5		0.2495	0.0397	0.8054	0.1749	0.0588	0.0146	0.0408	0.0081	0.0289	0.0095	0.3357	0.0874		0.4111	1.4742	3.6858	0.6666	0.6473	0.7232	0.7927	0.3646		25	75	100	50	100	75	50	0		cystine	Amino acid	Serine family (phosphoglycerate derived)	279
	8	293	58	Amino acid	Serine family (phosphoglycerate derived)	glycine		1.03	0.93	0.52	0.48	0.29	0.3		0.7195	0.0995	0.3501	0.0918	6.9343e-05	0.0001	2.6295e-05	3.838e-05	3.0783e-06	2.5029e-05	2.0615e-06	2.3337e-05		0.3498	1.3488	2.3934	0.3881	1.4769	2.3546	0.3607	0.7029		100	100	100	100	100	100	100	100		glycine	Amino acid	Serine family (phosphoglycerate derived)	340
	13	396	37076	Amino acid	Serine family (phosphoglycerate derived)	N-acetylserine		0.57	0.52	0.39	0.3	0.49	0.41		0.0001	0.0001	5.4109e-05	0.0002	1.7523e-05	5.7593e-05	2.1334e-06	1.3588e-05	0.0012	0.001	2.6266e-05	8.1437e-05		1.1648	1.0184	0.7997	1.2817	1.3265	0.9703	0.6628	0.393		100	100	100	100	100	100	100	100		N-acetylserine	Amino acid	Serine family (phosphoglycerate derived)	100001851
	23	397	48187	Amino acid	Serine family (phosphoglycerate derived)	N-acetyltaurine		0.81	0.83	1.28	1.16	1.17	1.46		0.082	0.016	0.0901	0.03	0.3969	0.0814	0.6181	0.0854	0.6241	0.1357	0.1921	0.054		1.3975	0.842	0.9182	1.3641	0.9258	0.7373	1.1322	1.0759		100	100	100	100	100	100	100	100		N-acetyltaurine	Amino acid	Serine family (phosphoglycerate derived)	100005466
	19	482	47897	Amino acid	Serine family (phosphoglycerate derived)	S-carboxymethyl-L-cysteine		0.76	0.51	0.61	0.46	0.76	0.65		0.0181	0.0048	0.0003	0.0005	0.0004	0.0003	1.1572e-05	2.4092e-05	0.0143	0.0054	0.0006	0.0006		1.1529	1.0291	0.8248	1.7288	1.3632	0.9569	0.8761	0.6245		100	100	100	100	100	100	100	100		S-carboxymethyl-L-cysteine	Amino acid	Serine family (phosphoglycerate derived)	100002324
	16	485	1648	Amino acid	Serine family (phosphoglycerate derived)	serine		2.12	1.39	1.24	0.9	0.84	0.7		2.2476e-05	4.4755e-05	0.0048	0.003	0.0133	0.0039	0.0543	0.0104	0.0563	0.0164	0.0003	0.0004		0.3233	0.8565	1.2679	0.4927	1.1757	1.5066	0.6854	1.0618		100	100	100	100	100	100	100	100		serine	Amino acid	Serine family (phosphoglycerate derived)	503
	18	488	39592	Amino acid	Serine family (phosphoglycerate derived)	S-methylcysteine		2.49	0.68	1.85	0.66	1.76	0.8		0.0003	0.0002	0.1423	0.0437	0.0003	0.0002	0.047	0.0091	0.0047	0.0025	0.1018	0.0315		0.3695	0.6828	0.7178	1.3516	1.9186	1.5722	0.9213	1.2636		100	100	100	100	100	100	100	100		S-methylcysteine	Amino acid	Serine family (phosphoglycerate derived)	100002749
	24	501	46960	Amino acid	Serine family (phosphoglycerate derived)	sulfate*		0.91	0.44	0.83	0.46	0.55	0.33		0.2969	0.0459	3.5552e-06	2.6593e-05	0.0262	0.0069	9.2531e-06	2.3056e-05	0.0013	0.001	0.0002	0.0003		0.5639	0.8538	1.2826	1.1609	1.5413	2.1539	0.5154	0.7063		100	100	100	100	100	100	100	100		sulfate*	Amino acid	Serine family (phosphoglycerate derived)	100002528
	17	503	2125	Amino acid	Serine family (phosphoglycerate derived)	taurine		3.01	4.32	3.07	4.58	2.81	5.43		7.7247e-06	2.5754e-05	1.7222e-06	1.9311e-05	2.0243e-05	6.0544e-05	8.8164e-06	2.2877e-05	3.4184e-05	8.6385e-05	5.8593e-05	0.0002		1.133	0.9563	1.0443	0.7899	0.6394	0.5403	3.4133	2.9312		100	100	100	100	100	100	100	100		taurine	Amino acid	Serine family (phosphoglycerate derived)	512
	443	175	48885	Carbohydrate	Amino sugar and nucleotide sugar	arabitol/xylitol		0.88	1.21	1.09	1.36	0.99	1.4		0.1003	0.0189	0.0126	0.0061	0.3295	0.0694	0.0074	0.002	0.9597	0.1911	0.0061	0.0031		1.2612	1.0377	1.1452	0.9235	0.8332	0.8142	1.1151	1.136		100	100	100	100	100	100	100	100		arabitol/xylitol	Carbohydrate	Amino sugar and nucleotide sugar	100006430
	440	176	48255	Carbohydrate	Amino sugar and nucleotide sugar	arabonate/xylonate		1.76	1.53	1.46	1.41	1.43	1.37		0.0012	0.0006	0.0054	0.0032	0.0199	0.0055	0.0222	0.0047	0.0205	0.0073	0.0323	0.0121		0.6653	1.0071	1.0232	0.7642	1.0372	1.0724	1.172	1.4658		100	100	100	100	100	100	100	100		arabonate/xylonate	Carbohydrate	Amino sugar and nucleotide sugar	100006115
	408	237	42420	Carbohydrate	Amino sugar and nucleotide sugar	erythronate*		1.49	1.07	1.47	1.16	1.66	1.1		0.0008	0.0004	0.2428	0.0688	0.0025	0.0011	0.0991	0.0172	0.0012	0.001	0.2741	0.073		0.7035	0.8594	0.7595	0.9788	1.0901	1.1404	1.0465	1.2592		100	100	100	100	100	100	100	100		erythronate*	Carbohydrate	Amino sugar and nucleotide sugar	100001320
	418	383	15741	Carbohydrate	Amino sugar and nucleotide sugar	N-acetyl-glucosamine 1-phosphate		1.06	0.81	1.45	1.04	1.65	1.03		0.8768	0.1177	0.1887	0.055	0.0232	0.0063	0.7882	0.1058	0.0094	0.004	0.7976	0.1767		0.851	0.8843	0.7765	1.1169	1.2311	1.2387	0.9012	1.2818		100	100	100	100	100	100	100	100		N-acetyl-glucosamine 1-phosphate	Carbohydrate	Amino sugar and nucleotide sugar	1212
	419	384	15107	Carbohydrate	Amino sugar and nucleotide sugar	N-acetylglucosamine 6-phosphate		0.78	0.56	0.63	0.64	1.11	1.08		0.0673	0.0138	0.005	0.003	0.0141	0.0042	0.0108	0.0027	0.4505	0.102	0.6109	0.1423		1.3262	1.0799	0.614	1.863	1.0683	0.6315	1.0369	0.679		100	100	100	100	100	100	100	100		N-acetylglucosamine 6-phosphate	Carbohydrate	Amino sugar and nucleotide sugar	1213
	422	473	15772	Carbohydrate	Amino sugar and nucleotide sugar	ribitol		1.39	0.97	1.59	1.17	1.19	0.95		0.0612	0.013	0.806	0.1749	0.0003	0.0002	0.0228	0.0049	0.1212	0.0323	0.5306	0.1259		0.6019	0.8233	1.1019	0.8585	1.1178	1.3839	0.834	1.3123		100	100	100	100	100	100	100	100		ribitol	Carbohydrate	Amino sugar and nucleotide sugar	100000406
	423	475	27731	Carbohydrate	Amino sugar and nucleotide sugar	ribonate		1.45	1.17	1.02	0.93	0.96	0.97		0.009	0.0029	0.1457	0.0444	0.9398	0.1743	0.4395	0.0628	0.6339	0.1367	0.9257	0.2004		0.7306	1.014	1.084	0.9075	1.1178	1.0721	1.0607	1.0356		100	100	100	100	100	100	100	100		ribonate	Carbohydrate	Amino sugar and nucleotide sugar	100001007
	424	476	1471	Carbohydrate	Amino sugar and nucleotide sugar	ribose		0.58	0.65	0.41	0.65	0.47	0.55		0.0002	0.0002	0.0005	0.0006	0.0001	0.0001	0.0016	0.0006	8.0223e-05	0.0001	0.0002	0.0003		1.3309	1.2301	1.0787	1.1881	0.7757	0.9291	0.775	0.5077		100	100	100	100	100	100	100	100		ribose	Carbohydrate	Amino sugar and nucleotide sugar	914
	446	477	54671	Carbohydrate	Amino sugar and nucleotide sugar	ribulose/xylulose		1.22	1.07	0.82	0.99	0.99	1.14		0.0133	0.0038	0.278	0.0765	0.0114	0.0035	0.9865	0.1289	0.9603	0.1911	0.0614	0.0203		0.6674	1.3995	1.1532	0.7641	1.1547	1.0023	0.8154	1.1471		100	100	100	100	100	100	100	100		ribulose/xylulose	Carbohydrate	Amino sugar and nucleotide sugar	100006122
	442	527	18396	Carbohydrate	Amino sugar and nucleotide sugar	UDP-N-acetylgalactosamine		0.74	0.62	0.52	0.58	0.65	0.76		0.0119	0.0035	0.0505	0.0189	0.006	0.0021	0.0121	0.0029	0.025	0.0085	0.0855	0.0269		1.2481	1.1745	0.9344	1.486	1.0432	0.8022	0.9195	0.6059		100	100	100	100	100	100	100	100		UDP-N-acetylgalactosamine	Carbohydrate	Amino sugar and nucleotide sugar	1257
	430	528	35162	Carbohydrate	Amino sugar and nucleotide sugar	UDP-N-acetylglucosamine		0.77	0.56	0.36	0.37	0.63	0.71		0.0005	0.0003	2.2763e-05	0.0001	8.5159e-06	4.5049e-05	1.2398e-06	1.0857e-05	6.9573e-05	0.0001	0.0011	0.0009		1.1661	1.1871	0.6882	1.6013	1.1567	0.6046	0.9029	0.4307		100	100	100	100	100	100	100	100		UDP-N-acetylglucosamine	Carbohydrate	Amino sugar and nucleotide sugar	1249
	433	544	15581	Carbohydrate	Amino sugar and nucleotide sugar	xylose		1.1	1.11	0.67	0.76	0.49	0.61		0.2697	0.0422	0.3835	0.0985	0.004	0.0016	0.0134	0.0031	0.0001	0.0002	0.0013	0.001		0.2949	1.2578	1.7319	0.294	1.1075	1.3838	0.3257	0.8425		100	100	100	100	100	100	100	100		xylose	Carbohydrate	Amino sugar and nucleotide sugar	826
	353	244	12021	Carbohydrate	Glycolysis	fructose-6-phosphate		0.81	0.48	0.78	0.65	0.94	1.03		0.335	0.0506	0.0247	0.0107	0.053	0.0132	0.0092	0.0024	0.659	0.1413	0.7938	0.1762		0.9329	1.0324	0.8647	1.5686	1.2415	0.7843	0.7537	0.8097		100	100	100	100	100	100	100	100		fructose-6-phosphate	Carbohydrate	Glycolysis	1232
	355	276	48152	Carbohydrate	Glycolysis	glucose		2.99	2.81	1.91	1.86	1.44	1.63		9.3942e-05	0.0001	0.0001	0.0003	4.088e-05	9.4471e-05	0.0001	9.693e-05	0.0014	0.001	0.0002	0.0003		0.3628	0.906	1.1958	0.3854	0.9283	1.0589	1.0847	1.7273		100	100	100	100	100	100	100	100		glucose	Carbohydrate	Glycolysis	572
	357	277	31260	Carbohydrate	Glycolysis	glucose 6-phosphate		0.68	0.5	1.12	1.23	1.23	1.12		0.0138	0.0039	0.0022	0.0017	0.2601	0.0561	0.0532	0.0102	0.0942	0.0255	0.2195	0.0603		1.0454	1.0464	0.9577	1.4028	0.9597	1.0473	0.7064	1.1757		100	100	100	100	100	100	100	100		glucose 6-phosphate	Carbohydrate	Glycolysis	291
	358	278	15443	Carbohydrate	Glycolysis	glucuronate		0.49	0.71	0.44	0.62	0.39	0.6		3.3922e-05	5.7899e-05	0.0015	0.0013	0.0007	0.0004	0.0086	0.0022	1.7537e-05	6.7449e-05	0.0005	0.0005		1.6391	1.2502	1.4056	1.1149	0.8811	0.9124	0.797	0.548		100	100	100	100	100	100	100	100		glucuronate	Carbohydrate	Glycolysis	100000257
	360	330	527	Carbohydrate	Glycolysis	lactate		2.21	1.62	1.98	1.12	1.61	1.24		0.011	0.0033	0.0673	0.0239	0.0243	0.0065	0.6656	0.0914	0.0831	0.0228	0.4049	0.1005		0.5324	0.8529	1.0512	0.7248	1.5132	1.3616	1.1767	1.6875		100	100	100	100	100	100	100	100		lactate	Carbohydrate	Glycolysis	482
	363	468	48990	Carbohydrate	Glycolysis	pyruvate		2.57	1.3	2.76	0.94	1.02	0.6		0.0004	0.0003	0.0352	0.0141	0.0017	0.0008	0.5807	0.081	0.7678	0.1601	7.6974e-05	0.0002		0.2302	0.587	1.593	0.4548	1.7238	2.7026	0.5911	1.6213		100	100	100	100	100	100	100	100		pyruvate	Carbohydrate	Glycolysis	823
	456	321	43849	Carbohydrate	Inositol metabolism	inositol 1-phosphate (I1P)		0.38	0.43	0.57	0.76	0.94	0.93		0.0008	0.0005	0.0004	0.0005	0.0053	0.0019	0.12	0.0204	0.5417	0.1218	0.4729	0.1137		1.7228	1.4689	0.8937	1.5581	1.1045	0.9022	0.663	0.8433		100	100	100	100	100	100	100	100		inositol 1-phosphate (I1P)	Carbohydrate	Inositol metabolism	370
	459	361	1124	Carbohydrate	Inositol metabolism	myo-inositol		2.54	2.64	1.95	2.33	1.83	2.33		1.0547e-06	8.3402e-06	2.4095e-05	0.0001	0.0003	0.0002	5.6797e-05	6.7444e-05	0.0005	0.0005	0.0002	0.0003		0.7373	1.1087	1.1835	0.7095	0.9265	0.9272	1.8764	2.1631		100	100	100	100	100	100	100	100		myo-inositol	Carbohydrate	Inositol metabolism	363
	398	286	1572	Carbohydrate	Photorespiration	glycerate		1.31	1.25	1.01	1.02	1.09	1.15		0.2797	0.0436	0.375	0.0965	0.8453	0.1595	0.9318	0.1232	0.7762	0.1615	0.5643	0.1331		0.8999	1.1649	1.0738	0.9435	1.1441	1.0156	1.1788	1.1708		100	100	100	100	100	100	100	100		glycerate	Carbohydrate	Photorespiration	1052
	394	430	20694	Carbohydrate	Photorespiration	oxalate (ethanedioate)		0.84	0.83	0.75	0.81	0.79	0.74		0.0451	0.0101	0.0161	0.0075	0.0339	0.0088	0.0777	0.014	0.0594	0.0171	0.032	0.012		0.9592	1.1179	1.0612	0.9771	1.034	1.1289	0.8067	0.835		100	100	100	100	100	100	100	100		oxalate (ethanedioate)	Carbohydrate	Photorespiration	100000841
	400	502	20693	Carbohydrate	Photorespiration	tartronate (hydroxymalonate)		1.43	1.06	1.43	0.88	1.4	1.14		0.0169	0.0045	0.253	0.071	0.0059	0.0021	0.1535	0.0253	0.0088	0.0039	0.3705	0.0941		0.7297	0.887	0.9078	0.9824	1.4426	1.1206	1.0459	1.2719		100	100	100	100	100	100	100	100		tartronate (hydroxymalonate)	Carbohydrate	Photorespiration	100000840
	474	118	43805	Carbohydrate	Sucrose, glucose,fructose metabolism	3-deoxyoctulosonate		0.74	0.71	0.49	0.55	0.48	0.51		0.0559	0.0122	0.0431	0.0166	0.0002	0.0002	0.0015	0.0006	0.0011	0.0009	0.0007	0.0006		0.753	1.3578	1.3983	0.7846	1.2182	1.2976	0.5557	0.6644		100	100	100	100	100	100	100	100		3-deoxyoctulosonate	Carbohydrate	Sucrose, glucose,fructose metabolism	100000095
	479	243	48195	Carbohydrate	Sucrose, glucose,fructose metabolism	fructose		3.48	3.04	2.04	1.94	1.51	1.76		0.0001	0.0001	8.7069e-05	0.0002	6.6334e-05	0.0001	0.0005	0.0003	0.0021	0.0014	0.0012	0.0009		0.3425	0.898	1.2081	0.3924	0.9426	1.0364	1.1919	1.8279		100	100	100	100	100	100	100	100		fructose	Carbohydrate	Sucrose, glucose,fructose metabolism	878
	481	248	34706	Carbohydrate	Sucrose, glucose,fructose metabolism	galactinol		5.82	4.33	16.09	18.89	14.18	22.16		1.4498e-07	4.9317e-06	3.2147e-05	0.0001	3.8817e-06	4.467e-05	1.5672e-05	2.678e-05	4.1213e-07	9.9171e-06	5.8315e-07	1.5962e-05		1.3724	0.5707	0.6479	1.8449	0.4862	0.4144	7.9885	9.1844		100	100	100	100	100	100	100	100		galactinol	Carbohydrate	Sucrose, glucose,fructose metabolism	100000908
	482	249	1117	Carbohydrate	Sucrose, glucose,fructose metabolism	galactitol (dulcitol)		0.82	2.65	0.86	2.59	0.99	2.76		0.0521	0.0115	0.0026	0.0019	0.2706	0.0579	1.7158e-05	2.7955e-05	0.9971	0.1974	0.0011	0.0008		1.9711	1.2291	1.0694	0.6107	0.4096	0.3842	1.6194	1.0605		100	100	100	100	100	100	100	100		galactitol (dulcitol)	Carbohydrate	Sucrose, glucose,fructose metabolism	1003
	483	250	27719	Carbohydrate	Sucrose, glucose,fructose metabolism	galactonate		1.5	1.72	1.12	1.43	1.06	1.36		0.0004	0.0003	0.0004	0.0005	0.0955	0.0226	0.0007	0.0004	0.3917	0.092	0.006	0.003		0.7381	1.1023	1.1548	0.6428	0.8625	0.906	1.1037	1.2293		100	100	100	100	100	100	100	100		galactonate	Carbohydrate	Sucrose, glucose,fructose metabolism	100001026
	485	251	15706	Carbohydrate	Sucrose, glucose,fructose metabolism	galactose 1-phosphate		1.23	1.04	0.67	0.76	0.81	1.03		0.4525	0.0658	0.9831	0.2054	0.0068	0.0023	0.0411	0.0081	0.2239	0.0547	0.7671	0.1713		0.8201	1.4278	1.1697	0.9681	1.249	0.9207	1.0111	0.9504		100	100	100	100	100	100	100	100		galactose 1-phosphate	Carbohydrate	Sucrose, glucose,fructose metabolism	100000300
	546	275	587	Carbohydrate	Sucrose, glucose,fructose metabolism	gluconate		1.17	1.15	1.21	1.31	1.45	1.48		0.8478	0.1145	0.892	0.1892	0.8733	0.1639	0.9634	0.1264	0.7898	0.1631	0.7429	0.1662		0.9774	1.296	1.0856	0.9929	1.2017	1.0602	1.1418	1.5695		100	100	100	100	100	100	100	100		gluconate	Carbohydrate	Sucrose, glucose,fructose metabolism	338
	497	349	15586	Carbohydrate	Sucrose, glucose,fructose metabolism	maltose		0.98	0.71	0.5	0.45	0.58	0.56		0.7618	0.1044	0.0007	0.0007	0.0041	0.0016	0.0009	0.0004	0.0057	0.0027	0.0083	0.0039		1.2889	0.943	0.81	1.7725	1.0532	0.8378	1.2652	0.47		100	100	100	100	100	100	100	75		maltose	Carbohydrate	Sucrose, glucose,fructose metabolism	913
	500	350	44688	Carbohydrate	Sucrose, glucose,fructose metabolism	maltotriose		0.67	1.45	0.96	2.86	0.88	2.84		0.0144	0.004	0.1298	0.0407	0.8433	0.1595	0.0112	0.0027	0.5945	0.1306	0.0102	0.0046		1.7236	1.1872	1.2956	0.8005	0.3982	0.4019	1.1612	1.1399		100	100	100	100	100	100	100	100		maltotriose	Carbohydrate	Sucrose, glucose,fructose metabolism	100000276
	491	351	46142	Carbohydrate	Sucrose, glucose,fructose metabolism	mannitol/sorbitol		0.84	0.62	0.85	0.55	1.06	0.56		0.0681	0.0139	0.0013	0.0012	0.0733	0.0178	0.0006	0.0003	0.5902	0.13	0.0021	0.0014		1.219	0.674	0.5401	1.6685	1.0363	1.0177	1.0287	0.5701		100	100	100	100	100	100	100	100		mannitol/sorbitol	Carbohydrate	Sucrose, glucose,fructose metabolism	100001740
	506	353	1469	Carbohydrate	Sucrose, glucose,fructose metabolism	mannose-6-phosphate		0.72	0.61	0.92	1.38	1.2	1.57		0.0418	0.0095	0.0093	0.0048	0.4109	0.0841	0.0369	0.0075	0.1706	0.0439	0.0109	0.0048		1.1652	1.0912	0.8401	1.3836	0.7332	0.643	0.8386	1.0092		100	100	100	100	100	100	100	100		mannose-6-phosphate	Carbohydrate	Sucrose, glucose,fructose metabolism	294
	544	358	46144	Carbohydrate	Sucrose, glucose,fructose metabolism	methyl glucopyranoside (alpha + beta)		1.19	1.41	2.4	2.87	2.87	1.94		0.8857	0.1187	0.5863	0.1345	0.0032	0.0013	0.0012	0.0005	0.0012	0.0009	0.0571	0.0192		0.8997	0.5376	0.4503	0.7615	0.4503	0.6661	1.0721	1.2918		100	25	25	75	0	25	75	100		methyl glucopyranoside (alpha + beta)	Carbohydrate	Sucrose, glucose,fructose metabolism	100005864
	514	472	586	Carbohydrate	Sucrose, glucose,fructose metabolism	raffinose		37.07	16.45	143.86	55.47	39.09	47.99		6.7613e-06	2.551e-05	0.0018	0.0015	0.0001	0.0001	0.0003	0.0002	7.2477e-05	0.0001	0.0001	0.0002		0.9056	0.2375	0.874	2.0408	0.616	0.7119	33.5692	34.1666		100	75	100	100	100	100	100	100		raffinose	Carbohydrate	Sucrose, glucose,fructose metabolism	879
	521	500	1519	Carbohydrate	Sucrose, glucose,fructose metabolism	sucrose		2.23	7	15.91	18.82	13.01	21.58		0.0089	0.0028	0.0009	0.0009	8.9778e-05	0.0001	7.4876e-05	7.7568e-05	0.0002	0.0003	0.0006	0.0006		1.9676	0.0647	0.0791	0.6262	0.0547	0.0477	4.3846	1.0294		100	50	50	100	25	0	100	100		sucrose	Carbohydrate	Sucrose, glucose,fructose metabolism	935
	369	154	46173	Carbohydrate	TCA cycle	aconitate [cis or trans]		0.44	0.17	1.55	0.38	1.17	0.3		0.0039	0.0015	0.0024	0.0018	0.1732	0.039	0.013	0.0031	0.6751	0.1442	0.0043	0.0024		0.9891	0.5672	0.752	2.6007	2.3332	2.9541	0.4373	0.878		100	100	100	100	100	100	100	100		aconitate [cis or trans]	Carbohydrate	TCA cycle	100001359
	370	173	528	Carbohydrate	TCA cycle	alpha-ketoglutarate		1.79	0.54	2.22	0.84	1.47	0.94		0.0014	0.0007	0.0032	0.0021	0.0053	0.0019	0.0026	0.0009	0.0138	0.0053	0.2222	0.0609		0.3744	0.5847	0.884	1.2474	1.5469	1.3814	0.6706	1.2969		100	100	100	100	100	100	100	100		alpha-ketoglutarate	Carbohydrate	TCA cycle	93
	372	203	1564	Carbohydrate	TCA cycle	citrate		0.61	0.24	8.69	0.59	1.9	0.32		0.0094	0.0029	0.0366	0.0145	0.0043	0.0016	0.1255	0.0212	0.1612	0.0419	0.0184	0.0075		0.819	0.206	0.9408	2.0549	3.0321	5.5338	0.4962	1.7901		100	100	100	100	100	100	100	100		citrate	Carbohydrate	TCA cycle	1124
	373	246	1643	Carbohydrate	TCA cycle	fumarate		1.08	0.8	0.71	0.48	0.6	0.44		0.1628	0.0279	0.0003	0.0005	0.0005	0.0003	3.0292e-06	1.7145e-05	5.2678e-05	0.0001	3.651e-06	2.6603e-05		0.6965	1.1232	1.3343	0.9417	1.6705	1.8173	0.7527	0.8029		100	100	100	100	100	100	100	100		fumarate	Carbohydrate	TCA cycle	330
	374	323	12110	Carbohydrate	TCA cycle	isocitrate		0.35	0.12	0.73	0.36	1.29	0.81		0.035	0.0082	0.0042	0.0026	0.1702	0.0384	0.0122	0.0029	0.4359	0.0991	0.3433	0.0889		1.207	0.9623	0.5399	3.6147	1.9437	0.8593	0.4226	0.6977		100	100	100	100	100	100	75	100		isocitrate	Carbohydrate	TCA cycle	1206
	375	346	1303	Carbohydrate	TCA cycle	malate		0.96	0.71	0.61	0.42	0.55	0.4		0.4279	0.0629	0.0002	0.0004	8.1473e-05	0.0001	3.8409e-06	1.794e-05	2.4507e-05	8.3561e-05	3.1222e-06	2.5639e-05		0.6708	1.1331	1.2638	0.9077	1.6562	1.7382	0.646	0.6915		100	100	100	100	100	100	100	100		malate	Carbohydrate	TCA cycle	409
	376	347	20676	Carbohydrate	TCA cycle	maleate		1.18	0.85	0.41	0.26	0.38	0.39		0.7511	0.1031	0.3975	0.1002	0.0026	0.0011	4.806e-05	6.0126e-05	0.0165	0.0061	0.0006	0.0006		0.726	1.028	1.0975	1.0135	1.5876	1.0658	0.8589	0.4201		100	100	100	100	100	100	100	100		maleate	Carbohydrate	TCA cycle	100000707
	380	499	1437	Carbohydrate	TCA cycle	succinate		0.85	0.64	0.72	0.48	0.58	0.46		0.0508	0.0112	0.003	0.0021	0.0066	0.0022	0.0001	9.8745e-05	0.0007	0.0007	0.0002	0.0003		0.7482	0.9881	1.2303	0.9969	1.4888	1.5344	0.6356	0.7094		100	100	100	100	100	100	100	100		succinate	Carbohydrate	TCA cycle	252
	1103	220	1659	Cofactors, Prosthetic Groups, Electron Carriers	Ascorbate metabolism	dehydroascorbate		1.12	0.94	0.91	0.91	0.99	1.05		0.0683	0.0139	0.2749	0.0763	0.0106	0.0033	0.2655	0.0408	0.89	0.1799	0.3705	0.0941		0.8366	1.1372	1.0424	0.999	1.132	0.9839	0.9383	1.0301		100	100	100	100	100	100	100	100		dehydroascorbate	Cofactors, Prosthetic Groups, Electron Carriers	Ascorbate metabolism	301
	1110	304	46957	Cofactors, Prosthetic Groups, Electron Carriers	Ascorbate metabolism	gulonate*		0.7	1.12	0.68	1.21	0.61	1.06		0.0099	0.003	0.2944	0.0802	0.015	0.0043	0.1334	0.0224	0.0052	0.0026	0.6477	0.1487		1.0682	1.6326	1.8198	0.6645	0.9224	1.053	0.7439	1.1177		100	100	100	100	100	100	100	100		gulonate*	Cofactors, Prosthetic Groups, Electron Carriers	Ascorbate metabolism	100001586
	1109	507	27738	Cofactors, Prosthetic Groups, Electron Carriers	Ascorbate metabolism	threonate		0.83	0.71	0.83	0.72	0.74	0.61		0.0101	0.0031	0.0012	0.0011	0.0239	0.0065	0.0024	0.0008	0.0043	0.0023	0.0005	0.0005		0.79	1.0519	1.1683	0.9284	1.2162	1.4342	0.6592	0.87		100	100	100	100	100	100	100	100		threonate	Cofactors, Prosthetic Groups, Electron Carriers	Ascorbate metabolism	100001022
	1095	221	36747	Cofactors, Prosthetic Groups, Electron Carriers	Carnitine metabolism	deoxycarnitine		3.01	19.08	2.75	11.99	2.44	8.31		0.0018	0.0008	2.7417e-05	0.0001	0.0003	0.0002	1.2047e-05	2.4092e-05	0.0015	0.001	1.1531e-06	1.8648e-05		0.6618	1.2897	1.4544	0.1045	0.296	0.4271	1.9939	3.5488		100	100	100	75	100	100	100	100		deoxycarnitine	Cofactors, Prosthetic Groups, Electron Carriers	Carnitine metabolism	100001662
	1057	440	1508	Cofactors, Prosthetic Groups, Electron Carriers	CoA metabolism	pantothenate		1.35	1	1.28	0.92	1.23	0.89		0.0155	0.0042	0.9104	0.1915	0.0115	0.0035	0.1956	0.0314	0.0233	0.0081	0.1982	0.0554		0.7661	0.811	0.8482	1.0388	1.1316	1.1636	1.0359	1.0393		100	100	100	100	100	100	100	100		pantothenate	Cofactors, Prosthetic Groups, Electron Carriers	CoA metabolism	1024
	1064	407	594	Cofactors, Prosthetic Groups, Electron Carriers	Nicotinate and nicotinamide metabolism	nicotinamide		0.68	0.86	0.61	0.49	0.57	0.35		0.0305	0.0074	0.3595	0.0936	0.0487	0.0122	0.0152	0.0035	0.0056	0.0027	0.1394	0.0414		1.1481	1.1853	1.2627	0.9028	1.4922	2.0935	0.7756	0.7255		100	100	100	100	100	100	100	100		nicotinamide	Cofactors, Prosthetic Groups, Electron Carriers	Nicotinate and nicotinamide metabolism	432
	1065	408	5278	Cofactors, Prosthetic Groups, Electron Carriers	Nicotinate and nicotinamide metabolism	nicotinamide adenine dinucleotide (NAD+)		0.6	0.63	0.35	0.42	0.4	0.55		8.8726e-05	0.0001	0.0001	0.0002	0.0002	0.0002	2.3211e-05	3.6136e-05	9.5513e-05	0.0001	0.0025	0.0016		1.1001	1.2027	1.0423	1.0536	0.9999	0.7616	0.6611	0.4196		100	100	100	100	100	100	100	100		nicotinamide adenine dinucleotide (NAD+)	Cofactors, Prosthetic Groups, Electron Carriers	Nicotinate and nicotinamide metabolism	1310
	1069	409	22152	Cofactors, Prosthetic Groups, Electron Carriers	Nicotinate and nicotinamide metabolism	nicotinamide ribonucleotide (NMN)		1.04	1.59	0.77	1.04	0.91	1.21		0.3085	0.0475	9.3923e-05	0.0002	0.0096	0.0031	0.5899	0.0822	0.1718	0.0441	0.0346	0.0129		1.128	1.202	1.0129	0.7351	0.8847	0.7619	1.1715	0.9234		100	100	100	100	100	100	100	100		nicotinamide ribonucleotide (NMN)	Cofactors, Prosthetic Groups, Electron Carriers	Nicotinate and nicotinamide metabolism	1312
	1070	410	33013	Cofactors, Prosthetic Groups, Electron Carriers	Nicotinate and nicotinamide metabolism	nicotinamide riboside		0.5	1.07	0.52	1.19	0.67	1.14		0.0085	0.0027	0.7042	0.1568	0.0031	0.0013	0.2599	0.04	0.0228	0.008	0.4169	0.1033		2.541	1.2687	0.9807	1.1942	0.5544	0.5769	1.2796	0.6591		100	100	100	100	100	100	100	100		nicotinamide riboside	Cofactors, Prosthetic Groups, Electron Carriers	Nicotinate and nicotinamide metabolism	100001310
	1071	411	1504	Cofactors, Prosthetic Groups, Electron Carriers	Nicotinate and nicotinamide metabolism	nicotinate		0.41	0.43	0.53	0.56	0.45	0.43		8.4004e-05	0.0001	0.0011	0.001	0.0017	0.0009	0.0033	0.0011	0.0105	0.0044	0.0073	0.0035		1.8466	0.9942	1.1803	1.7679	0.9448	1.2367	0.7578	0.5294		100	100	100	100	100	100	100	75		nicotinate	Cofactors, Prosthetic Groups, Electron Carriers	Nicotinate and nicotinamide metabolism	567
	1073	412	33471	Cofactors, Prosthetic Groups, Electron Carriers	Nicotinate and nicotinamide metabolism	nicotinate ribonucleoside		0.78	0.72	0.71	0.59	0.69	0.6		0.0057	0.002	0.0026	0.0019	0.0027	0.0012	3.1812e-06	1.7145e-05	0.0042	0.0023	3.1708e-06	2.5639e-05		1.1149	0.88	0.9015	1.198	1.0554	1.034	0.8666	0.6217		100	100	100	100	100	100	100	100		nicotinate ribonucleoside	Cofactors, Prosthetic Groups, Electron Carriers	Nicotinate and nicotinamide metabolism	100001316
	1074	516	32401	Cofactors, Prosthetic Groups, Electron Carriers	Nicotinate and nicotinamide metabolism	trigonelline (N'-methylnicotinate)		1.73	2.91	2.26	3.71	2.09	3.2		0.0002	0.0002	1.9655e-08	2.2053e-06	0.0001	0.0001	7.5637e-05	7.7568e-05	0.0002	0.0002	8.4227e-06	4.5405e-05		0.9358	1.0626	1.1473	0.5549	0.6466	0.7494	1.6173	2.3995		100	100	100	100	100	100	100	100		trigonelline (N'-methylnicotinate)	Cofactors, Prosthetic Groups, Electron Carriers	Nicotinate and nicotinamide metabolism	100001092
	1089	153	15488	Cofactors, Prosthetic Groups, Electron Carriers	Oxidative phosphorylation	acetylphosphate		1.37	1.08	0.72	0.69	1.01	1.18		0.0339	0.008	0.4795	0.1167	0.0018	0.0009	0.0009	0.0004	0.9352	0.1876	0.0546	0.0187		0.9845	1.1101	0.7931	1.2453	1.1549	0.6748	1.3462	0.7972		100	100	100	100	100	100	100	100		acetylphosphate	Cofactors, Prosthetic Groups, Electron Carriers	Oxidative phosphorylation	1211
	1090	359	37070	Cofactors, Prosthetic Groups, Electron Carriers	Oxidative phosphorylation	methylphosphate		0.65	0.7	0.64	0.89	0.69	0.91		0.0007	0.0004	0.0027	0.0019	0.0003	0.0002	0.0489	0.0094	0.0434	0.0132	0.1757	0.0498		1.6642	1.0721	0.9886	1.5388	0.7702	0.7465	1.0793	0.6824		100	100	100	100	100	100	100	100		methylphosphate	Cofactors, Prosthetic Groups, Electron Carriers	Oxidative phosphorylation	100001805
	1091	450	42109	Cofactors, Prosthetic Groups, Electron Carriers	Oxidative phosphorylation	phosphate		0.89	0.84	1.01	0.92	0.82	0.79		0.123	0.0223	0.0199	0.0089	0.8636	0.1624	0.2476	0.0385	0.0542	0.0159	0.0188	0.0076		0.8112	1.0057	1.2498	0.8658	1.1048	1.2996	0.7258	1.0205		100	100	100	100	100	100	100	100		phosphate	Cofactors, Prosthetic Groups, Electron Carriers	Oxidative phosphorylation	461
	1096	241	2134	Cofactors, Prosthetic Groups, Electron Carriers	Riboflavin and FAD metabolism	flavin adenine dinucleotide (FAD)		0.5	0.52	0.34	0.51	0.57	0.53		0.0002	0.0002	0.0015	0.0013	3.8994e-05	9.3869e-05	0.0005	0.0003	0.0026	0.0016	0.0022	0.0015		2.0408	1.3002	0.7748	1.9712	0.8686	0.8363	1.0285	0.443		100	100	100	100	100	100	100	100		flavin adenine dinucleotide (FAD)	Cofactors, Prosthetic Groups, Electron Carriers	Riboflavin and FAD metabolism	327
	1098	242	15797	Cofactors, Prosthetic Groups, Electron Carriers	Riboflavin and FAD metabolism	flavin mononucleotide (FMN)		0.4	0.4	0.38	0.6	0.63	0.51		1.2366e-06	8.3402e-06	2.2675e-05	0.0001	0.0014	0.0007	0.0815	0.0146	0.0236	0.0082	0.0063	0.0031		1.9236	1.3537	0.8137	1.9326	0.8607	1.0095	0.7637	0.515		100	100	100	100	100	100	100	100		flavin mononucleotide (FMN)	Cofactors, Prosthetic Groups, Electron Carriers	Riboflavin and FAD metabolism	100000251
	1097	474	1827	Cofactors, Prosthetic Groups, Electron Carriers	Riboflavin and FAD metabolism	riboflavin (Vitamin B2)		0.65	0.73	0.46	0.41	0.46	0.47		0.0256	0.0063	0.0651	0.0234	0.0058	0.002	0.0065	0.0018	0.0059	0.0028	0.0059	0.003		1.5166	0.9057	0.9107	1.3445	1.0241	0.889	0.9871	0.4158		100	100	100	100	100	100	100	100		riboflavin (Vitamin B2)	Cofactors, Prosthetic Groups, Electron Carriers	Riboflavin and FAD metabolism	500
	1118	504	5341	Cofactors, Prosthetic Groups, Electron Carriers	Thiamine metabolism	thiamin (Vitamin B1)		0.53	0.5	0.55	0.66	0.53	0.51		0.0007	0.0004	0.0004	0.0005	0.0023	0.0011	0.0004	0.0002	0.0041	0.0022	0.0007	0.0006		1.7408	1.0025	1.0397	1.838	0.8385	1.0868	0.9182	0.5558		100	100	100	100	100	100	100	100		thiamin (Vitamin B1)	Cofactors, Prosthetic Groups, Electron Carriers	Thiamine metabolism	873
	1121	174	1561	Cofactors, Prosthetic Groups, Electron Carriers	Tocopherol metabolism	alpha-tocopherol		1.23	1.22	0.46	0.54	0.54	0.5		0.2026	0.0338	0.2243	0.0639	0.0018	0.0009	0.005	0.0014	0.005	0.0025	0.0031	0.0019		1.2976	0.989	0.8488	1.3115	0.848	0.9118	1.5996	0.4555		100	100	100	100	100	100	100	100		alpha-tocopherol	Cofactors, Prosthetic Groups, Electron Carriers	Tocopherol metabolism	1105
	1131	461	1651	Cofactors, Prosthetic Groups, Electron Carriers	Vitamin B metabolism (B6 or B12)	pyridoxal		0.56	0.54	0.33	0.4	0.4	0.51		1.2086e-05	3.4656e-05	8.1528e-07	1.2785e-05	7.6357e-05	0.0001	1.195e-05	2.4092e-05	8.4813e-05	0.0001	0.0003	0.0004		1.4312	1.2307	1.0053	1.4677	0.9898	0.7832	0.7981	0.4003		100	100	100	100	100	100	100	100		pyridoxal	Cofactors, Prosthetic Groups, Electron Carriers	Vitamin B metabolism (B6 or B12)	491
	1134	465	31555	Cofactors, Prosthetic Groups, Electron Carriers	Vitamin B metabolism (B6 or B12)	pyridoxate		1.94	0.93	2.81	2.21	1.95	1.8		0.0016	0.0007	0.4452	0.1107	1.036e-05	4.8689e-05	6.1014e-05	6.7852e-05	0.0006	0.0006	0.0004	0.0005		0.5737	0.6928	0.9982	1.197	0.8822	1.0813	1.1158	1.9456		100	100	100	100	100	100	100	100		pyridoxate	Cofactors, Prosthetic Groups, Electron Carriers	Vitamin B metabolism (B6 or B12)	100001121
	1135	466	608	Cofactors, Prosthetic Groups, Electron Carriers	Vitamin B metabolism (B6 or B12)	pyridoxine (Vitamin B6)		0.84	0.5	0.96	0.6	0.65	0.46		0.015	0.0041	3.4336e-05	0.0001	0.6315	0.122	0.0044	0.0013	0.0046	0.0024	0.0007	0.0006		0.6417	0.8526	1.2669	1.0756	1.3608	1.7658	0.5377	0.82		100	100	100	100	100	100	100	100		pyridoxine (Vitamin B6)	Cofactors, Prosthetic Groups, Electron Carriers	Vitamin B metabolism (B6 or B12)	936
	1569	111	40479	Hormone metabolism	Auxin metabolism	2-oxindole-3-acetate		0.76	0.87	0.58	0.85	0.47	0.97		0.2606	0.0412	0.5137	0.1226	0.3923	0.0807	0.5095	0.0721	0.1798	0.0457	0.8218	0.1813		0.9596	1.5374	1.9058	0.8341	1.0526	0.9239	0.7263	0.8965		100	75	100	100	100	100	100	100		2-oxindole-3-acetate	Hormone metabolism	Auxin metabolism	100003109
	1564	317	27513	Hormone metabolism	Auxin metabolism	indoleacetate		1.1	1.23	0.6	0.57	0.4	0.42		0.5193	0.0744	0.1475	0.0447	0.0038	0.0015	0.0027	0.0009	0.0005	0.0005	0.0003	0.0004		0.2977	1.0151	1.5319	0.2645	1.0851	1.4517	0.3262	0.6134		50	100	100	25	100	100	75	100		indoleacetate	Hormone metabolism	Auxin metabolism	100001034
	1010	88	43761	Lipids	Fatty acid, Amino	2-aminoheptanoate		5.09	1.8	5.11	1.52	4.19	1.5		0.0002	0.0002	0.0355	0.0142	0.0002	0.0002	0.0862	0.0152	0.0007	0.0007	0.0874	0.0274		0.2727	0.4716	0.5749	0.772	1.5818	1.61	1.3868	2.4095		100	100	100	100	100	100	100	100		2-aminoheptanoate	Lipids	Fatty acid, Amino	100004542
	1030	163	21134	Lipids	Fatty acid, Dicarboxylate	adipate		1.69	1.27	1.25	1.27	1.32	1.35		0.0095	0.0029	0.0593	0.0216	0.224	0.049	0.1459	0.0242	0.1046	0.028	0.0822	0.0262		0.7128	1.0193	0.9593	0.9432	1.0008	0.9418	1.2015	1.2697		100	100	100	100	100	100	100	100		adipate	Lipids	Fatty acid, Dicarboxylate	100000863
	1016	183	18362	Lipids	Fatty acid, Dicarboxylate	azelate (nonanedioate)		0.75	0.86	0.5	0.55	0.76	0.76		0.0012	0.0006	0.0311	0.0129	0.0009	0.0005	0.0084	0.0022	0.0247	0.0084	0.059	0.0198		2.3617	1.0379	0.6819	2.0654	0.9369	0.6805	1.7817	0.5197		100	100	100	100	100	100	100	100		azelate (nonanedioate)	Lipids	Fatty acid, Dicarboxylate	2029
	1028	283	396	Lipids	Fatty acid, Dicarboxylate	glutarate (pentanedioate)		4.29	1.83	2.02	1	1.71	1.25		0.0001	0.0001	0.0003	0.0005	0.0022	0.001	0.9509	0.1251	0.0094	0.004	0.015	0.0063		0.3915	0.6731	0.7923	0.9183	1.3581	1.088	1.6776	1.3566		100	100	100	100	100	100	100	100		glutarate (pentanedioate)	Lipids	Fatty acid, Dicarboxylate	339
	1019	348	15872	Lipids	Fatty acid, Dicarboxylate	malonate		2.06	2	2.05	1.91	1.63	1.48		0.001	0.0005	0.0015	0.0013	0.0001	0.0001	0.0001	0.0001	0.005	0.0025	0.0018	0.0013		0.8257	0.859	1.0802	0.8503	0.9209	1.1903	1.7003	1.7623		100	100	100	100	100	100	100	100		malonate	Lipids	Fatty acid, Dicarboxylate	818
	1020	454	15704	Lipids	Fatty acid, Dicarboxylate	pimelate (heptanedioate)		11	2.99	6.86	2.34	7.25	3.13		4.0697e-05	6.3494e-05	0.0006	0.0007	5.0797e-05	0.0001	0.0002	0.0002	0.0003	0.0003	0.0001	0.0002		0.3325	0.4415	0.4177	1.2251	1.292	0.9672	3.6575	3.028		100	100	100	100	100	100	100	100		pimelate (heptanedioate)	Lipids	Fatty acid, Dicarboxylate	100000101
	1022	498	15730	Lipids	Fatty acid, Dicarboxylate	suberate (octanedioate)		0.68	0.73	0.65	1.06	0.78	1.15		0.0092	0.0029	0.0317	0.0131	0.0312	0.0081	0.6054	0.084	0.0365	0.0114	0.179	0.0507		2.1851	1.1124	0.9324	2.0151	0.6813	0.6305	1.4797	0.7242		100	100	100	100	100	100	100	100		suberate (octanedioate)	Lipids	Fatty acid, Dicarboxylate	100000016
	646	100	52281	Lipids	Free fatty acid	2-hydroxybutyrate/2-hydroxyisobutyrate		1.29	0.83	1.1	0.8	0.96	0.71		0.0745	0.0149	0.1188	0.0379	0.2074	0.0458	0.1832	0.0297	0.7223	0.1535	0.0025	0.0016		0.7118	0.7502	0.8536	1.1077	1.0327	1.1599	0.9149	0.8222		0	75	75	100	75	100	75	75		2-hydroxybutyrate/2-hydroxyisobutyrate	Lipids	Free fatty acid	100008928
	647	102	52294	Lipids	Free fatty acid	2-hydroxyglutarate		1.13	0.68	0.63	0.41	0.57	0.46		0.1121	0.0208	0.0007	0.0008	0.0027	0.0012	7.6877e-05	7.7568e-05	0.0021	0.0014	0.0006	0.0006		0.6878	0.9676	1.0712	1.1531	1.4821	1.3211	0.7801	0.6076		100	100	100	100	100	100	100	100		2-hydroxyglutarate	Lipids	Free fatty acid	100002070
	565	104	35675	Lipids	Free fatty acid	2-hydroxypalmitate		0.32	1.04	0.66	1.52	1	1.55		0.0196	0.0052	0.9936	0.2061	0.5228	0.1047	0.1933	0.0311	0.742	0.1565	0.1595	0.0462		2.9173	1.8657	1.2275	0.8946	0.8086	0.7925	0.9337	1.2322		100	100	100	100	100	100	100	100		2-hydroxypalmitate	Lipids	Free fatty acid	100001579
	566	105	17945	Lipids	Free fatty acid	2-hydroxystearate		0.37	0.47	0.76	0.68	1.01	0.79		0.0781	0.0154	0.1522	0.0458	0.5746	0.1134	0.2099	0.0335	0.6319	0.1367	0.1099	0.0335		1.9278	0.9588	0.7208	1.5371	1.0732	0.9282	0.7204	0.7316		100	100	100	100	100	100	100	100		2-hydroxystearate	Lipids	Free fatty acid	1239
	653	121	542	Lipids	Free fatty acid	3-hydroxybutyrate (BHBA)		0.8	0.77	0.37	0.36	0.47	0.51		0.0363	0.0084	0.0137	0.0066	0.0102	0.0032	0.0007	0.0003	0.0138	0.0053	0.0014	0.001		1.2779	1.1206	0.8928	1.3299	1.1578	0.8112	1.0244	0.4172		100	100	100	100	100	100	100	75		3-hydroxybutyrate (BHBA)	Lipids	Free fatty acid	254
	577	150	21239	Lipids	Free fatty acid	8-hydroxyoctanoate		2.32	1.37	1.18	0.82	2.53	1.42		0.0043	0.0016	0.1614	0.0482	0.3012	0.0642	0.1431	0.0238	0.0008	0.0007	0.1139	0.0346		0.5804	1.0239	0.4766	0.9815	1.4809	0.8481	1.3449	1.2077		100	100	100	100	100	100	100	100		8-hydroxyoctanoate	Lipids	Free fatty acid	100000956
	635	170	37073	Lipids	Free fatty acid	alpha-hydroxycaproate		1.59	0.39	1.3	0.33	1.23	0.37		0.0378	0.0087	0.0012	0.0011	0.2342	0.051	0.0015	0.0006	0.3033	0.073	0.0011	0.0009		0.7711	0.477	0.5028	3.1314	1.8594	1.6856	1.2296	0.6209		100	75	100	100	100	100	100	100		alpha-hydroxycaproate	Lipids	Free fatty acid	100001723
	579	177	1118	Lipids	Free fatty acid	arachidate (20:0)		0.31	1.13	0.63	1.28	0.89	1.15		0.0607	0.0129	0.8931	0.1892	0.7776	0.1482	0.2924	0.0438	0.7622	0.1592	0.3438	0.0889		3.8442	1.5892	1.1221	1.0689	0.7804	0.8664	1.2105	0.9953		100	100	100	100	100	100	100	100		arachidate (20:0)	Lipids	Free fatty acid	893
	584	196	32489	Lipids	Free fatty acid	caproate (6:0)		0.95	1.72	1.24	2.51	1.08	2.23		0.7125	0.0991	0.0758	0.0262	0.3497	0.0731	0.0393	0.0079	0.7883	0.1631	0.0089	0.0041		0.6737	1.4997	1.7169	0.3711	0.7391	0.8345	0.6372	1.8573		100	100	100	50	75	100	75	100		caproate (6:0)	Lipids	Free fatty acid	926
	585	197	32492	Lipids	Free fatty acid	caprylate (8:0)		0.38	0.42	0.71	0.32	0.77	0.59		0.0589	0.0127	0.1906	0.0553	0.5392	0.1077	0.0631	0.0118	0.7247	0.1535	0.4422	0.1081		1.4156	0.7931	0.733	1.3011	1.7527	0.9506	0.5431	0.5637		100	50	75	75	100	50	50	50		caprylate (8:0)	Lipids	Free fatty acid	932
	595	233	33587	Lipids	Free fatty acid	eicosenoate (20:1)		0.36	0.71	0.4	0.59	0.67	0.67		0.076	0.0151	0.3935	0.0994	0.4373	0.0894	0.2873	0.0432	0.9644	0.1916	0.0103	0.0046		2.4281	1.519	0.9019	1.2227	1.0166	0.9013	0.865	0.6009		100	100	100	100	100	100	100	100		eicosenoate (20:1)	Lipids	Free fatty acid	100001335
	607	336	1105	Lipids	Free fatty acid	linoleate (18:2n6)		0.21	0.54	0.06	0.14	0.15	0.12		0.0112	0.0033	0.139	0.0428	0.012	0.0036	0.0068	0.0018	0.0405	0.0125	0.0001	0.0002		3.9127	1.4559	0.608	1.5283	0.6763	0.7954	0.8254	0.0916		100	100	100	100	100	100	100	25		linoleate (18:2n6)	Lipids	Free fatty acid	180
	608	337	34035	Lipids	Free fatty acid	linolenate [alpha or gamma; (18:3n3 or 6)]		0.24	0.57	0.06	0.15	0.15	0.17		0.0004	0.0003	0.0913	0.0302	0.0005	0.0003	0.001	0.0005	0.0034	0.002	0.002	0.0013		5.2703	1.823	0.7504	2.1949	0.7499	0.6703	1.2602	0.1147		100	100	100	100	100	100	100	100		linolenate [alpha or gamma; (18:3n3 or 6)]	Lipids	Free fatty acid	100001337
	619	431	1336	Lipids	Free fatty acid	palmitate (16:0)		0.4	0.84	0.58	0.72	0.82	0.66		0.0672	0.0138	0.5316	0.1256	0.4811	0.0973	0.3263	0.0483	0.8499	0.1731	0.0153	0.0064		1.9949	1.0561	0.7446	0.9427	0.8412	0.9272	0.79	0.6091		100	100	100	100	100	100	100	100		palmitate (16:0)	Lipids	Free fatty acid	424
	709	30	27447	Lipids	Glycerolipids	1-linoleoylglycerol (18:2)		0.4	0.85	0.68	0.87	0.9	1.05		0.0998	0.0189	0.5563	0.1292	0.9706	0.1791	0.7727	0.1043	0.8181	0.1679	0.9867	0.2104		6.5485	1.0353	0.7849	3.1004	0.8048	0.6719	2.6233	0.7036		100	100	100	100	100	100	100	100		1-linoleoylglycerol (18:2)	Lipids	Glycerolipids	100001040
	712	74	21127	Lipids	Glycerolipids	1-palmitoylglycerol (16:0)		0.41	0.92	0.66	0.88	0.68	0.78		0.1048	0.0196	0.6728	0.1513	0.3751	0.078	0.8571	0.1146	0.4353	0.0991	0.2839	0.0753		4.3999	0.9902	0.9595	1.9709	0.7387	0.8381	1.8227	0.6512		100	75	75	100	75	100	100	100		1-palmitoylglycerol (16:0)	Lipids	Glycerolipids	100000827
	716	107	32506	Lipids	Glycerolipids	2-linoleoylglycerol (18:2)		0.5	0.95	1.37	1.19	0.96	1.22		0.1711	0.0291	0.4633	0.1143	0.3331	0.0699	0.4612	0.0657	0.6258	0.1358	0.3514	0.0904		4.1665	0.7512	1.068	2.1838	0.8667	0.8472	2.0786	1.0303		100	75	100	100	100	100	50	100		2-linoleoylglycerol (18:2)	Lipids	Glycerolipids	100000987
	729	287	15122	Lipids	Glycerolipids	glycerol		0.49	0.77	0.42	0.69	0.56	0.81		0.0632	0.0133	0.2941	0.0802	0.0261	0.0069	0.1709	0.0279	0.0729	0.0204	0.3547	0.091		2.1069	1.2315	0.9225	1.3546	0.7476	0.6369	1.0429	0.5185		100	100	100	100	100	100	100	100		glycerol	Lipids	Glycerolipids	1254
	672	19	37752	Lipids	Oxylipins	13-HODE + 9-HODE		1.03	1.31	2.69	4.19	1.06	1.73		0.7204	0.0995	0.0319	0.0131	0.0001	0.0002	0.0002	0.0001	0.5453	0.1224	0.0043	0.0024		0.5738	1.2297	3.1159	0.4498	0.7913	1.9192	0.5889	3.3134		100	100	100	100	100	100	100	100		13-HODE + 9-HODE	Lipids	Oxylipins	100002196
	770	32	34419	Lipids	Phospholipids	1-linoleoyl-GPC (18:2)		0.71	0.87	0.25	0.22	0.46	0.97		0.1157	0.0212	0.5792	0.1332	0.0146	0.0043	0.0183	0.0041	0.0669	0.0189	0.6253	0.1445		2.275	0.9838	0.5334	1.8533	1.1073	0.2557	1.6174	0.2468		100	100	100	100	100	100	100	100		1-linoleoyl-GPC (18:2)	Lipids	Phospholipids	100001395
	771	33	36600	Lipids	Phospholipids	1-linoleoyl-GPE (18:2)*		0.69	0.69	0.46	0.42	0.7	0.94		0.047	0.0104	0.0446	0.017	0.0379	0.0097	0.0244	0.0052	0.1632	0.0422	0.6022	0.141		1.8733	1.0138	0.6706	1.8896	1.1189	0.5004	1.3014	0.468		100	100	100	100	100	100	100	100		1-linoleoyl-GPE (18:2)*	Lipids	Phospholipids	100001570
	772	35	36594	Lipids	Phospholipids	1-linoleoyl-GPI (18:2)*		0.35	0.53	0.27	0.43	0.65	0.85		0.0215	0.0056	0.0755	0.0261	0.0144	0.0042	0.0402	0.008	0.1843	0.0466	0.1448	0.0428		5.4652	1.266	0.5192	3.6167	0.7804	0.3972	1.9316	0.3368		100	100	100	100	100	100	100	100		1-linoleoyl-GPI (18:2)*	Lipids	Phospholipids	100001778
	855	45	52451	Lipids	Phospholipids	1-oleoyl-2-linoleoyl-GPI (18:1/18:2)*		0.92	0.85	0.26	0.26	0.43	0.83		0.2842	0.0442	0.016	0.0075	0.0247	0.0066	0.0208	0.0045	0.1532	0.04	0.3852	0.0973		1.413	0.962	0.5776	1.5337	0.9528	0.2984	1.3063	0.2475		100	100	100	100	100	100	100	75		1-oleoyl-2-linoleoyl-GPI (18:1/18:2)*	Lipids	Phospholipids	100008979
	837	46	36812	Lipids	Phospholipids	1-oleoyl-GPA (18:1)		0.43	0.5	0.22	0.27	0.3	0.36		2.6015e-05	4.7818e-05	0.0005	0.0006	0.0011	0.0006	0.0005	0.0002	0.0007	0.0006	0.0025	0.0016		2.2248	1.1926	0.8888	1.889	0.9877	0.7403	0.9499	0.2638		100	100	100	100	100	100	100	100		1-oleoyl-GPA (18:1)	Lipids	Phospholipids	100001671
	775	47	48258	Lipids	Phospholipids	1-oleoyl-GPC (18:1)		0.67	0.75	0.18	0.17	0.34	0.5		0.0245	0.0061	0.1315	0.0411	0.0027	0.0012	0.0031	0.001	0.0127	0.0051	0.0485	0.0169		1.9346	1.0021	0.5446	1.7254	1.0815	0.3682	1.2885	0.1833		100	100	100	100	100	100	100	100		1-oleoyl-GPC (18:1)	Lipids	Phospholipids	100001272
	776	48	35628	Lipids	Phospholipids	1-oleoyl-GPE (18:1)		0.6	0.59	0.22	0.19	0.34	0.41		0.0041	0.0015	0.0037	0.0024	0.0055	0.0019	0.0013	0.0005	0.0143	0.0054	0.016	0.0066		1.8841	0.9969	0.6462	1.9266	1.1607	0.54	1.1273	0.2199		100	100	100	100	100	100	100	100		1-oleoyl-GPE (18:1)	Lipids	Phospholipids	100001569
	927	49	45968	Lipids	Phospholipids	1-oleoyl-GPG (18:1)*		0.33	0.63	1	1	1	1		0.0006	0.0004	0.0516	0.0192										1.9343	0.5405	0.5405	1.0036	0.5405	0.5405	0.6303	0.5405		100	0	0	100	0	0	100	0		1-oleoyl-GPG (18:1)*	Lipids	Phospholipids	100005716
	777	50	36602	Lipids	Phospholipids	1-oleoyl-GPI (18:1)*		0.4	0.44	0.56	0.54	1	1		0.0953	0.0182	0.1361	0.0423	0.2054	0.0455	0.2135	0.0339						1.3292	0.2481	0.1387	1.1935	0.2576	0.1387	0.529	0.1387		100	50	0	100	50	0	75	0		1-oleoyl-GPI (18:1)*	Lipids	Phospholipids	100001777
	852	62	42446	Lipids	Phospholipids	1-palmitoyl-2-linoleoyl-GPC (16:0/18:2)		1.21	1.18	0.71	0.66	0.82	0.99		0.0365	0.0084	0.1888	0.055	0.1245	0.0286	0.0877	0.0154	0.3342	0.0798	0.8369	0.1836		0.9324	1.0967	0.9584	0.959	1.1794	0.789	1.1291	0.7839		100	100	100	100	100	100	100	100		1-palmitoyl-2-linoleoyl-GPC (16:0/18:2)	Lipids	Phospholipids	1537
	853	63	42449	Lipids	Phospholipids	1-palmitoyl-2-linoleoyl-GPE (16:0/18:2)		0.88	0.7	0.4	0.36	0.54	0.57		0.1577	0.0272	0.0023	0.0018	0.0191	0.0054	0.0098	0.0025	0.0448	0.0135	0.0557	0.019		0.9634	1.236	0.9211	1.2167	1.3925	0.8718	0.8509	0.4969		100	100	100	100	100	100	100	100		1-palmitoyl-2-linoleoyl-GPE (16:0/18:2)	Lipids	Phospholipids	100001870
	854	65	52450	Lipids	Phospholipids	1-palmitoyl-2-linoleoyl-GPI (16:0/18:2)		0.91	0.89	0.46	0.49	0.65	0.96		0.1979	0.0331	0.0978	0.032	0.0098	0.0031	0.0114	0.0027	0.0479	0.0144	0.6834	0.1544		1.4378	0.9934	0.6947	1.48	0.9267	0.4713	1.3143	0.4528		100	100	100	100	100	100	100	100		1-palmitoyl-2-linoleoyl-GPI (16:0/18:2)	Lipids	Phospholipids	1528
	858	68	52461	Lipids	Phospholipids	1-palmitoyl-2-oleoyl-GPC (16:0/18:1)		1.1	0.98	0.35	0.33	0.56	0.64		0.4147	0.0612	0.8592	0.1847	0.0232	0.0063	0.014	0.0032	0.0816	0.0225	0.1393	0.0414		1.0422	1.0878	0.6913	1.1642	1.1698	0.6018	1.1426	0.3839		100	100	100	100	100	100	100	100		1-palmitoyl-2-oleoyl-GPC (16:0/18:1)	Lipids	Phospholipids	1539
	857	69	19263	Lipids	Phospholipids	1-palmitoyl-2-oleoyl-GPE (16:0/18:1)		0.91	0.56	0.27	0.22	0.48	0.44		0.5363	0.0766	0.0071	0.004	0.0082	0.0027	0.003	0.001	0.032	0.0103	0.0212	0.0083		0.9697	1.3715	0.786	1.5691	1.6794	0.8501	0.8846	0.3754		100	100	100	100	100	100	100	100		1-palmitoyl-2-oleoyl-GPE (16:0/18:1)	Lipids	Phospholipids	1526
	779	75	34428	Lipids	Phospholipids	1-palmitoyl-GPA (16:0)		0.46	0.61	0.36	0.48	0.39	0.54		0.0011	0.0006	0.0151	0.0071	0.0041	0.0016	0.0055	0.0015	0.003	0.0018	0.0117	0.005		1.5978	1.1436	1.0743	1.2068	0.8685	0.7769	0.742	0.4165		100	100	100	100	100	100	100	100		1-palmitoyl-GPA (16:0)	Lipids	Phospholipids	100001445
	780	76	33955	Lipids	Phospholipids	1-palmitoyl-GPC (16:0)		0.95	1.11	0.56	0.48	0.6	0.82		0.6458	0.0913	0.4994	0.1205	0.0689	0.0169	0.0489	0.0094	0.0872	0.0238	0.3611	0.0923		1.2129	0.9986	0.9378	1.0374	1.165	0.6882	1.1511	0.5636		100	100	100	100	100	100	100	100		1-palmitoyl-GPC (16:0)	Lipids	Phospholipids	100001263
	781	77	35631	Lipids	Phospholipids	1-palmitoyl-GPE (16:0)		0.71	0.71	0.37	0.35	0.5	0.68		0.023	0.0059	0.0222	0.0098	0.0105	0.0033	0.0045	0.0014	0.0257	0.0086	0.1043	0.0321		1.3121	1.0413	0.7593	1.3096	1.0916	0.5611	0.9284	0.3823		100	100	100	100	100	100	100	100		1-palmitoyl-GPE (16:0)	Lipids	Phospholipids	100001567
	822	78	45970	Lipids	Phospholipids	1-palmitoyl-GPG (16:0)*		0.49	0.75	0.25	0.25	0.43	0.58		0.0049	0.0018	0.0877	0.0296	0.0075	0.0025	0.0045	0.0014	0.0306	0.0099	0.0825	0.0262		2.9282	1.0277	0.5829	1.9151	1.0268	0.4335	1.4412	0.2527		100	100	100	100	100	100	100	100		1-palmitoyl-GPG (16:0)*	Lipids	Phospholipids	100005717
	782	79	35305	Lipids	Phospholipids	1-palmitoyl-GPI (16:0)		0.67	0.71	0.37	0.4	0.4	0.57		0.2315	0.0376	0.2226	0.0636	0.0201	0.0056	0.0454	0.0089	0.0279	0.0093	0.0779	0.025		2.3583	0.9975	0.9246	2.2226	0.9233	0.6456	1.5875	0.3687		100	100	100	100	100	100	100	100		1-palmitoyl-GPI (16:0)	Lipids	Phospholipids	100001655
	888	200	15506	Lipids	Phospholipids	choline		0.81	0.79	0.71	0.74	0.77	0.77		0.0005	0.0003	0.0006	0.0007	0.0003	0.0002	0.0004	0.0002	0.0004	0.0004	0.0004	0.0005		1.1967	1.0623	0.9744	1.2231	1.0152	0.975	0.9691	0.7514		100	100	100	100	100	100	100	100		choline	Lipids	Phospholipids	1256
	889	201	34396	Lipids	Phospholipids	choline phosphate		1.83	0.95	1	0.71	0.78	0.67		0.002	0.0009	0.1078	0.0346	0.9033	0.1685	8.0932e-05	7.9861e-05	0.0012	0.0009	6.6428e-05	0.0002		0.5229	0.9497	1.2239	1.0104	1.3369	1.4183	0.9575	0.9541		100	100	100	100	100	100	100	100		choline phosphate	Lipids	Phospholipids	267
	890	239	1497	Lipids	Phospholipids	ethanolamine		0.49	0.63	0.28	0.55	0.33	0.56		4.8009e-05	7.3224e-05	0.0026	0.0019	6.6121e-05	0.0001	0.0003	0.0002	0.0002	0.0003	0.0013	0.0009		1.606	1.5098	1.296	1.2425	0.7741	0.7708	0.7815	0.428		100	100	100	100	100	100	100	100		ethanolamine	Lipids	Phospholipids	420
	794	288	43847	Lipids	Phospholipids	glycerol 3-phosphate		1.06	0.64	0.95	0.91	1.11	0.9		0.4852	0.07	0.0004	0.0005	0.3887	0.0806	0.0593	0.0112	0.0561	0.0164	0.0761	0.0245		0.9465	0.9961	0.8578	1.5643	1.0407	1.0523	0.9997	0.9483		100	100	100	100	100	100	100	100		glycerol 3-phosphate	Lipids	Phospholipids	100000258
	795	289	37455	Lipids	Phospholipids	glycerophosphoethanolamine		1.5	0.97	1.85	1.48	2.2	1.95		0.0018	0.0008	0.901	0.1902	0.0002	0.0002	0.0039	0.0012	9.6332e-05	0.0001	0.0001	0.0002		0.784	0.9234	0.7748	1.2081	1.157	0.8732	1.1764	1.707		100	100	100	100	100	100	100	100		glycerophosphoethanolamine	Lipids	Phospholipids	100001620
	880	290	48857	Lipids	Phospholipids	glycerophosphoglycerol		1.52	0.65	1.39	0.97	1.63	1.47		0.0049	0.0018	0.0065	0.0037	0.0052	0.0019	0.7176	0.0978	0.0026	0.0016	0.0025	0.0016		0.7096	0.9033	0.7665	1.6629	1.2875	0.8535	1.0783	1.2515		100	100	100	100	100	100	100	100		glycerophosphoglycerol	Lipids	Phospholipids	100001619
	839	291	47155	Lipids	Phospholipids	glycerophosphoinositol*		1.06	0.62	1.36	1.34	2.21	2.51		0.5023	0.0723	0.0026	0.0019	0.0037	0.0015	0.0064	0.0017	3.8904e-05	9.138e-05	2.1153e-05	7.8163e-05		1.3705	0.8724	0.5355	2.3414	0.8851	0.4732	1.452	1.1858		100	100	100	100	100	100	100	100		glycerophosphoinositol*	Lipids	Phospholipids	100001621
	796	292	15990	Lipids	Phospholipids	glycerophosphorylcholine (GPC)		2.72	1.81	4.19	2.59	4.56	3.62		0.0017	0.0008	0.0119	0.006	0.0001	0.0001	0.0002	0.0001	3.9851e-06	2.6327e-05	9.3917e-06	4.6226e-05		0.5644	0.8585	0.7902	0.8458	1.3914	0.9934	1.5351	3.6004		100	100	100	100	100	100	100	100		glycerophosphorylcholine (GPC)	Lipids	Phospholipids	100000269
	803	452	1600	Lipids	Phospholipids	phosphoethanolamine		5.81	1.5	2.02	1.18	2.16	1.58		2.9777e-05	5.2064e-05	0.0021	0.0017	1.5734e-05	5.5716e-05	0.0631	0.0118	5.8224e-05	0.0001	0.0001	0.0002		0.3789	0.7151	0.6678	1.4666	1.228	0.9108	2.2013	1.4431		100	100	100	100	100	100	100	100		phosphoethanolamine	Lipids	Phospholipids	1026
	938	453	1510	Lipids	Sphingolipid	phytosphingosine		1.37	0.95	0.49	0.37	0.6	0.48		0.0163	0.0044	0.524	0.1243	0.009	0.0029	0.001	0.0004	0.0157	0.0058	0.0063	0.0031		0.5896	1.4644	1.2019	0.8494	1.9131	1.4771	0.8103	0.716		100	100	100	100	100	100	100	100		phytosphingosine	Lipids	Sphingolipid	469
	939	492	17769	Lipids	Sphingolipid	sphinganine		1.11	0.66	0.28	0.16	0.47	0.28		0.2471	0.0395	0.0045	0.0028	0.002	0.0009	4.7401e-05	6.0126e-05	0.0081	0.0036	0.0009	0.0008		0.6142	1.4739	0.8723	1.0401	2.6265	1.4483	0.6848	0.411		100	100	100	100	100	100	100	100		sphinganine	Lipids	Sphingolipid	313
	940	493	17747	Lipids	Sphingolipid	sphingosine		0.63	0.4	0.27	0.21	0.53	0.38		0.016	0.0043	0.0015	0.0013	0.0003	0.0002	9.2008e-05	8.5948e-05	0.0024	0.0015	0.0002	0.0003		1.1594	1.354	0.6726	1.8112	1.7236	0.9368	0.7298	0.359		100	100	100	100	100	100	100	100		sphingosine	Lipids	Sphingolipid	297
	951	191	27414	Lipids	Sterols	beta-sitosterol		1.35	1.06	1.14	0.86	0.96	1.02		0.0155	0.0042	0.5422	0.1271	0.5862	0.1152	0.4048	0.0585	0.6537	0.1404	0.8941	0.195		0.9081	0.844	1.0096	1.1639	1.1165	0.9505	1.2283	0.9654		100	100	100	100	100	100	100	100		beta-sitosterol	Lipids	Sterols	100001033
	954	194	33997	Lipids	Sterols	campesterol		0.97	0.9	1	1.21	0.98	1.28		0.6633	0.0932	0.3238	0.0865	0.9238	0.1717	0.2849	0.043	0.7866	0.163	0.1512	0.0443		1.4181	0.9123	0.9272	1.5249	0.7506	0.7124	1.3746	0.9085		100	100	100	100	100	100	100	100		campesterol	Lipids	Sterols	100001269
	962	245	21187	Lipids	Sterols	fucosterol		0.96	0.69	0.73	0.45	0.59	0.44		0.7946	0.1085	0.0111	0.0057	0.2345	0.051	0.0059	0.0016	0.024	0.0083	0.0079	0.0037		0.8422	0.9058	1.1298	1.1734	1.469	1.4925	0.809	0.6634		100	100	100	100	100	100	100	100		fucosterol	Lipids	Sterols	100000930
	963	497	21183	Lipids	Sterols	stigmasterol		1.81	1.54	2.94	1.88	1.46	1.09		0.0066	0.0023	0.0086	0.0046	0.0009	0.0005	0.0085	0.0022	0.0563	0.0164	0.6607	0.1505		0.6	0.6402	1.2866	0.7043	1.0032	1.7333	1.0868	1.881		100	100	100	100	100	100	100	100		stigmasterol	Lipids	Sterols	100000923
	1148	90	1553	Nucleotide	Purine metabolism	2'-deoxyadenosine		0.11	0.11	0.17	0.18	0.43	0.26		0.0008	0.0004	0.0003	0.0005	9.0213e-05	0.0001	1.2794e-05	2.4225e-05	0.0006	0.0006	8.8804e-05	0.0002		3.1469	1.2362	0.4958	2.9482	1.1825	0.7989	0.3385	0.2117		100	100	100	100	100	100	100	100		2'-deoxyadenosine	Nucleotide	Purine metabolism	211
	1197	91	46333	Nucleotide	Purine metabolism	2'-deoxyadenosine 5'-monophosphate		0.13	0.09	0.13	0.09	0.58	0.16		8.9086e-05	0.0001	8.0408e-05	0.0002	6.5755e-05	0.0001	0.0002	0.0002	0.0229	0.008	0.0001	0.0002		3.0722	1.1304	0.258	4.5524	1.735	0.9303	0.4032	0.1491		100	100	100	100	100	100	100	100		2'-deoxyadenosine 5'-monophosphate	Nucleotide	Purine metabolism	100000485
	1149	94	1411	Nucleotide	Purine metabolism	2'-deoxyguanosine		0.12	0.11	0.18	0.21	0.62	0.33		0.0003	0.0002	7.3354e-05	0.0002	0.0002	0.0002	2.5531e-05	3.8058e-05	0.0107	0.0044	0.0002	0.0003		4.4531	1.4158	0.415	4.7089	1.2368	0.7836	0.5179	0.259		100	100	100	100	100	100	100	100		2'-deoxyguanosine	Nucleotide	Purine metabolism	348
	1150	95	35662	Nucleotide	Purine metabolism	2'-deoxyguanosine 5'-monophosphate (dGMP)		0.12	0.09	0.21	0.16	0.84	0.3		0.0018	0.0008	0.0011	0.001	0.0004	0.0003	0.0002	0.0002	0.2869	0.0695	0.0002	0.0003		2.4536	1.1394	0.2873	3.3378	1.493	0.8095	0.2956	0.2424		100	100	100	100	100	100	100	100		2'-deoxyguanosine 5'-monophosphate (dGMP)	Nucleotide	Purine metabolism	100001546
	1151	96	15076	Nucleotide	Purine metabolism	2'-deoxyinosine		0.17	0.25	0.14	0.26	0.41	0.49		0.0049	0.0018	0.0194	0.0087	0.0016	0.0008	0.1149	0.0197	0.1764	0.045	0.6905	0.1557		3.5158	1.2166	0.423	2.3299	0.6758	0.3547	0.5854	0.173		100	100	100	100	75	25	100	50		2'-deoxyinosine	Nucleotide	Purine metabolism	100000135
	1194	110	42607	Nucleotide	Purine metabolism	2'-O-methyladenosine		1.13	1.18	1.53	1.56	1.71	1.11		0.5676	0.0809	0.6453	0.1463	0.0793	0.0191	0.0706	0.013	0.0361	0.0113	0.6524	0.1491		3.4202	0.7269	0.6512	3.2666	0.7111	0.9993	3.8542	1.112		100	100	100	100	100	100	100	100		2'-O-methyladenosine	Nucleotide	Purine metabolism	100004047
	1154	149	31580	Nucleotide	Purine metabolism	7-methylguanosine		0.61	0.54	0.64	0.48	0.48	0.24		0.0656	0.0136	0.0168	0.0077	0.0481	0.0121	0.043	0.0084	0.03	0.0098	0.0021	0.0014		0.8556	0.816	1.0728	0.9678	1.0937	2.1649	0.5197	0.5197		100	100	100	100	100	100	0	0		7-methylguanosine	Nucleotide	Purine metabolism	100001118
	1156	155	554	Nucleotide	Purine metabolism	adenine		0.24	0.23	0.23	0.28	0.29	0.29		0.0005	0.0003	0.0003	0.0005	2.172e-05	6.305e-05	0.0001	0.0001	2.6965e-05	8.383e-05	2.7125e-05	8.1437e-05		1.598	1.1811	0.9283	1.6719	0.9733	0.9425	0.3812	0.2715		100	100	100	100	100	100	100	100		adenine	Nucleotide	Purine metabolism	880
	1157	156	555	Nucleotide	Purine metabolism	adenosine		0.5	0.6	0.39	0.49	0.43	0.5		5.2919e-05	7.7419e-05	0.0006	0.0007	2.3121e-05	6.5201e-05	6.6711e-05	7.3028e-05	3.1678e-05	8.5855e-05	7.5062e-05	0.0002		1.6514	1.1621	1.0472	1.3921	0.9247	0.9025	0.8297	0.4514		100	100	100	100	100	100	100	100		adenosine	Nucleotide	Purine metabolism	798
	1158	157	36815	Nucleotide	Purine metabolism	adenosine 2'-monophosphate (2'-AMP)		1.48	1.61	1.03	1.3	1.27	1.38		0.0216	0.0056	0.0016	0.0013	0.7204	0.1386	0.0272	0.0057	0.0335	0.0107	0.0491	0.017		1.9235	0.9908	0.8043	1.7658	0.7877	0.7421	2.8414	1.0211		100	100	100	100	100	100	100	100		adenosine 2'-monophosphate (2'-AMP)	Nucleotide	Purine metabolism	100001694
	1160	158	35142	Nucleotide	Purine metabolism	adenosine 3'-monophosphate (3'-AMP)		9.33	9.45	8.01	10.15	5.87	7.85		0.0001	0.0001	2.3076e-05	0.0001	0.0001	0.0001	3.5216e-06	1.7623e-05	1.8506e-05	6.7449e-05	1.9348e-05	7.8163e-05		0.8453	0.8083	1.102	0.835	0.6379	0.8247	7.8885	6.4735		100	100	100	100	75	100	100	100		adenosine 3'-monophosphate (3'-AMP)	Nucleotide	Purine metabolism	100001449
	1162	160	32342	Nucleotide	Purine metabolism	adenosine 5'-monophosphate (AMP)		0.63	0.58	0.42	0.44	0.54	0.6		3.4757e-06	1.661e-05	7.3028e-05	0.0002	7.8151e-05	0.0001	6.9606e-06	2.1202e-05	1.829e-05	6.7449e-05	9.6921e-05	0.0002		1.2239	1.1769	0.9139	1.3479	1.1136	0.8166	0.7767	0.4938		100	100	100	100	100	100	100	100		adenosine 5'-monophosphate (AMP)	Nucleotide	Purine metabolism	209
	1163	161	37467	Nucleotide	Purine metabolism	adenosine-2',3'-cyclic monophosphate		3.36	2.2	3.14	2.65	4.7	1.86		0.0001	0.0001	0.0005	0.0006	5.7475e-05	0.0001	0.0006	0.0003	1.4778e-05	6.2482e-05	0.0017	0.0012		0.7445	0.7516	0.5024	1.1339	0.8917	1.2693	2.498	2.3633		100	100	100	100	100	100	100	100		adenosine-2',3'-cyclic monophosphate	Nucleotide	Purine metabolism	72
	1166	167	33434	Nucleotide	Purine metabolism	allantoic acid		1.3	0.69	0.42	0.42	0.27	0.37		0.1508	0.0262	0.1885	0.055	4.6466e-05	9.9698e-05	0.0006	0.0003	1.0018e-05	5.2701e-05	2.5598e-05	8.1437e-05		0.3325	1.3168	2.0554	0.6203	1.3152	1.4938	0.4308	0.5465		100	100	100	100	100	100	100	100		allantoic acid	Nucleotide	Purine metabolism	218
	1167	168	1107	Nucleotide	Purine metabolism	allantoin		0.79	0.71	0.7	0.61	0.49	0.57		0.062	0.0131	0.126	0.0398	0.004	0.0016	0.0065	0.0018	4.5556e-05	0.0001	0.0058	0.003		0.8777	1.1429	1.6301	0.9729	1.3067	1.4006	0.6955	0.7971		100	100	100	100	100	100	100	100		allantoin	Nucleotide	Purine metabolism	1002
	1168	299	32352	Nucleotide	Purine metabolism	guanine		0.71	0.63	1.27	1.29	1.37	1		0.0845	0.0164	0.0383	0.0149	0.5878	0.1153	0.5556	0.078	0.4212	0.0968	0.8275	0.1819		1.7996	0.8624	0.7971	2.0393	0.8494	1.0916	1.2849	1.0955		100	100	100	100	100	100	100	100		guanine	Nucleotide	Purine metabolism	172
	1169	300	1573	Nucleotide	Purine metabolism	guanosine		0.43	0.5	0.25	0.39	0.39	0.45		2.0639e-07	4.9317e-06	6.9692e-05	0.0002	5.4022e-06	4.467e-05	7.7502e-05	7.7568e-05	3.4325e-05	8.6385e-05	0.0001	0.0002		2.1237	1.59	1.0253	1.8169	1.0319	0.8816	0.9096	0.3984		100	100	100	100	100	100	100	100		guanosine	Nucleotide	Purine metabolism	1099
	1189	301	39786	Nucleotide	Purine metabolism	guanosine 3'-monophosphate (3'-GMP)		3.05	4.82	4.16	8.98	2.8	2.16		0.0215	0.0056	0.0003	0.0005	0.0102	0.0032	4.9867e-06	1.8388e-05	0.0026	0.0016	0.0041	0.0023		0.7177	0.6382	0.9491	0.4535	0.2953	1.2281	2.1867	2.6529		75	75	100	100	50	100	100	100		guanosine 3'-monophosphate (3'-GMP)	Nucleotide	Purine metabolism	100002704
	1171	302	2849	Nucleotide	Purine metabolism	guanosine 5'- monophosphate (5'-GMP)		0.52	0.46	0.37	0.39	0.51	0.51		7.9038e-06	2.5754e-05	1.1477e-05	6.7776e-05	7.393e-05	0.0001	1.0628e-05	2.4092e-05	8.5161e-05	0.0001	9.8956e-05	0.0002		1.396	1.1957	0.881	1.5772	1.1467	0.8701	0.7317	0.4465		100	100	100	100	100	100	100	100		guanosine 5'- monophosphate (5'-GMP)	Nucleotide	Purine metabolism	347
	1172	303	37139	Nucleotide	Purine metabolism	guanosine-2',3'-cyclic monophosphate		1.81	1.17	1.72	1.38	2.22	0.68		0.0079	0.0026	0.3059	0.0825	0.005	0.0018	0.0903	0.0158	0.0008	0.0007	0.0483	0.0169		0.7797	0.8012	0.6201	1.2026	0.9985	2.013	1.4119	1.3761		100	100	100	100	100	100	100	100		guanosine-2',3'-cyclic monophosphate	Nucleotide	Purine metabolism	74
	1174	314	3127	Nucleotide	Purine metabolism	hypoxanthine		0.3	0.97	0.59	0.6	0.29	0.48		0.0036	0.0014	0.8879	0.189	0.0784	0.0189	0.0262	0.0055	0.0006	0.0006	0.0059	0.003		1.8509	1.0247	2.0614	0.5766	1.0001	1.2499	0.5583	0.6007		100	100	100	100	100	100	100	100		hypoxanthine	Nucleotide	Purine metabolism	171
	1175	319	1123	Nucleotide	Purine metabolism	inosine		0.75	1.74	0.4	0.47	0.32	0.47		0.0935	0.0179	0.004	0.0026	0.0055	0.0019	0.0123	0.0029	0.0089	0.0039	0.022	0.0086		2.7356	0.9893	1.2165	1.1741	0.8405	0.8423	2.0483	0.3936		100	100	100	100	100	100	100	75		inosine	Nucleotide	Purine metabolism	361
	1176	320	2133	Nucleotide	Purine metabolism	inosine 5'-monophosphate (IMP)		2.07	2.56	0.17	0.29	0.44	0.54		0.0037	0.0014	0.0026	0.0019	0.002	0.0009	0.0048	0.0014	0.0146	0.0055	0.0382	0.014		1.2565	1.5516	0.6055	1.0153	0.918	0.493	2.5978	0.2666		100	100	100	100	100	100	100	100		inosine 5'-monophosphate (IMP)	Nucleotide	Purine metabolism	362
	1177	365	15650	Nucleotide	Purine metabolism	N1-methyladenosine		0.33	0.36	0.98	0.8	0.83	0.44		0.0023	0.0009	0.0052	0.0031	0.9999	0.1831	0.4119	0.0591	0.416	0.096	0.0196	0.0079		1.2745	0.8347	0.9871	1.1694	1.0146	1.8633	0.4218	0.8164		100	100	100	100	100	100	100	100		N1-methyladenosine	Nucleotide	Purine metabolism	1242
	1178	366	31609	Nucleotide	Purine metabolism	N1-methylguanosine		0.5	0.48	0.67	0.78	0.88	0.75		0.081	0.0159	0.0718	0.0251	0.0527	0.0132	0.0915	0.016	0.4159	0.096	0.2021	0.0562		2.1899	1.138	0.8706	2.287	0.9829	1.0233	1.1023	0.7675		100	100	100	100	100	100	100	100		N1-methylguanosine	Nucleotide	Purine metabolism	100001122
	1180	368	35137	Nucleotide	Purine metabolism	N2,N2-dimethylguanosine		0.52	0.44	0.69	0.51	0.66	0.45		0.1096	0.0204	0.0697	0.0245	0.0079	0.0026	0.0041	0.0013	0.0418	0.0128	0.013	0.0055		1.3189	0.86	0.8891	1.5794	1.1487	1.3046	0.6921	0.5899		100	100	100	100	100	100	100	100		N2,N2-dimethylguanosine	Nucleotide	Purine metabolism	100001412
	1181	369	35133	Nucleotide	Purine metabolism	N2-methylguanosine		0.4	0.48	0.89	1.02	0.94	0.8		0.0031	0.0013	0.0124	0.0061	0.6213	0.1205	0.8958	0.1186	0.7485	0.1573	0.6221	0.1443		1.4412	0.7435	0.6991	1.1898	0.6452	0.8191	0.5727	0.6591		100	75	75	100	50	75	50	75		N2-methylguanosine	Nucleotide	Purine metabolism	100001467
	1164	372	35157	Nucleotide	Purine metabolism	N6-carbamoylthreonyladenosine		0.75	0.76	0.92	0.97	0.98	0.89		0.0289	0.0071	0.0333	0.0135	0.3134	0.0664	0.8017	0.1074	0.9417	0.1885	0.2082	0.0578		1.4726	0.9417	0.8835	1.4472	0.8935	0.9774	1.1031	0.8694		100	100	100	100	100	100	100	100		N6-carbamoylthreonyladenosine	Nucleotide	Purine metabolism	100001415
	1183	375	37114	Nucleotide	Purine metabolism	N6-methyladenosine		0.29	0.31	0.35	0.6	1.19	0.86		3.5418e-05	5.9045e-05	8.9568e-05	0.0002	0.0012	0.0006	0.0397	0.008	0.394	0.0921	0.5387	0.1273		4.6398	0.9449	0.281	4.2887	0.5575	0.3858	1.3326	0.3331		100	100	50	100	100	75	100	50		N6-methyladenosine	Nucleotide	Purine metabolism	213
	1196	376	48130	Nucleotide	Purine metabolism	N6-succinyladenosine		0.36	0.61	0.14	0.37	0.29	0.96		1.9311e-05	4.4116e-05	0.0382	0.0149	1.7838e-05	5.7593e-05	0.0006	0.0003	0.0016	0.0011	0.7036	0.158		2.8944	1.8328	0.926	1.6956	0.7222	0.2756	1.038	0.2646		100	100	100	100	100	100	100	100		N6-succinyladenosine	Nucleotide	Purine metabolism	100001664
	1184	530	1604	Nucleotide	Purine metabolism	urate		0.69	1	6.26	4.73	0.78	1.19		0.1961	0.0328			0.0073	0.0024	0.022	0.0047	0.2055	0.0506	0.1557	0.0452		0.1454	0.1682	1.3446	0.1004	0.2227	0.8858	0.1004	1.0535		75	25	100	0	25	100	0	100		urate	Nucleotide	Purine metabolism	1134
	1185	541	3147	Nucleotide	Purine metabolism	xanthine		0.13	0.35	1.48	0.92	0.43	0.47		4.0744e-05	6.3494e-05	0.0006	0.0007	0.2195	0.0481	0.745	0.101	0.0197	0.0071	0.029	0.0109		2.274	0.5858	2.0102	0.8528	0.9451	1.8396	0.2999	0.869		100	100	100	100	100	100	100	100		xanthine	Nucleotide	Purine metabolism	1004
	1186	542	15136	Nucleotide	Purine metabolism	xanthosine		0.22	0.32	0.27	0.25	0.58	0.45		0.0014	0.0007	0.0027	0.0019	0.0002	0.0002	0.0003	0.0002	0.0113	0.0046	0.0012	0.0009		16.7431	0.934	0.44	11.5585	1.0004	0.569	3.6579	0.2542		100	100	100	100	100	100	100	100		xanthosine	Nucleotide	Purine metabolism	100000299
	1204	92	15949	Nucleotide	Pyrimidine metabolism	2'-deoxycytidine		0.11	0.09	0.64	0.27	1.49	0.28		0.0065	0.0022	0.0056	0.0033	0.0719	0.0176	0.0008	0.0004	0.1478	0.039	0.0025	0.0016		3.0102	0.6853	0.2933	3.6654	1.6377	1.5382	0.328	0.4361		100	100	100	100	100	100	75	100		2'-deoxycytidine	Nucleotide	Pyrimidine metabolism	100000125
	1205	93	533	Nucleotide	Pyrimidine metabolism	2'-deoxycytidine 5'-monophosphate		0.16	0.11	0.22	0.16	0.63	0.29		0.0004	0.0003	0.0001	0.0003	0.0005	0.0003	0.0003	0.0002	0.0138	0.0053	0.0002	0.0003		2.5296	1.1049	0.3836	3.7852	1.5307	0.8364	0.4025	0.2405		100	100	100	100	100	100	100	100		2'-deoxycytidine 5'-monophosphate	Nucleotide	Pyrimidine metabolism	298
	1240	131	3155	Nucleotide	Pyrimidine metabolism	3-ureidopropionate		0.81	0.49	1.22	0.52	0.66	0.41		0.0983	0.0187	0.0001	0.0002	0.3055	0.065	0.0103	0.0026	0.0401	0.0124	0.0087	0.004		0.7106	0.6119	1.1212	1.1787	1.4374	1.7973	0.5743	0.7451		100	100	100	100	100	100	100	100		3-ureidopropionate	Nucleotide	Pyrimidine metabolism	1053
	1215	141	38159	Nucleotide	Pyrimidine metabolism	5-methyl-2'-deoxycytidine		0.21	0.14	0.58	0.25	2.49	0.36		0.0155	0.0042	0.0073	0.0041	0.0432	0.011	0.0014	0.0006	0.0094	0.004	0.0104	0.0046		2.9799	0.855	0.1997	4.532	1.989	1.4	0.631	0.4973		100	100	50	100	100	100	75	100		5-methyl-2'-deoxycytidine	Nucleotide	Pyrimidine metabolism	100002300
	1212	142	22119	Nucleotide	Pyrimidine metabolism	5-methylcytidine		0.24	0.25	0.39	0.34	0.33	0.31		0.0116	0.0034	0.0083	0.0045	0.0032	0.0013	0.0019	0.0007	0.0014	0.001	0.0019	0.0013		1.8273	0.8424	1.0134	1.7801	0.965	1.0581	0.4394	0.3324		100	100	100	100	100	100	100	100		5-methylcytidine	Nucleotide	Pyrimidine metabolism	100000763
	1214	145	35136	Nucleotide	Pyrimidine metabolism	5-methyluridine (ribothymidine)		0.18	0.22	0.54	0.91	0.5	0.53		0.0019	0.0008	0.0012	0.0011	0.1006	0.0236	0.391	0.0567	0.0615	0.0176	0.0813	0.026		4.3233	0.8339	0.9018	3.6237	0.4951	0.8542	0.7863	0.4512		100	75	100	100	50	75	75	0		5-methyluridine (ribothymidine)	Nucleotide	Pyrimidine metabolism	100001446
	1236	186	55	Nucleotide	Pyrimidine metabolism	beta-alanine		3.38	2.68	1.48	1.23	0.74	0.83		1.2798e-06	8.3402e-06	0.0001	0.0002	0.0047	0.0017	0.0276	0.0058	0.0021	0.0014	0.036	0.0133		0.208	0.9099	1.8272	0.2629	1.0954	1.6222	0.7037	1.3439		100	100	100	100	100	100	100	100		beta-alanine	Nucleotide	Pyrimidine metabolism	244
	1216	212	514	Nucleotide	Pyrimidine metabolism	cytidine		0.92	0.94	1	0.74	0.78	0.79		0.2367	0.0383	0.3173	0.0854	0.9576	0.177	0.0101	0.0025	0.0496	0.0148	0.1063	0.0325		1.2306	0.7005	0.9033	1.2042	0.9542	0.891	1.1289	0.7014		100	100	100	100	100	100	100	100		cytidine	Nucleotide	Pyrimidine metabolism	827
	1220	213	37465	Nucleotide	Pyrimidine metabolism	cytidine 2',3'-cyclic monophosphate		0.98	0.77	2.65	3.14	2.21	1.91		0.991	0.1311	0.2056	0.0595	0.0003	0.0002	0.0001	9.5369e-05	0.0137	0.0053	0.0041	0.0023		0.968	0.843	1.0124	1.2343	0.7114	1.1696	0.9448	2.2344		100	100	100	100	100	100	100	100		cytidine 2',3'-cyclic monophosphate	Nucleotide	Pyrimidine metabolism	73
	1218	214	2959	Nucleotide	Pyrimidine metabolism	cytidine 3'-monophosphate (3'-CMP)		0.6	0.58	0.82	0.99	0.95	0.77		0.0084	0.0027	0.0052	0.0031	0.3433	0.0719	0.9516	0.1251	0.5656	0.1258	0.1415	0.0419		1.2453	1.083	0.936	1.281	0.897	1.1514	0.7487	0.891		100	100	100	100	100	100	100	100		cytidine 3'-monophosphate (3'-CMP)	Nucleotide	Pyrimidine metabolism	105
	1217	216	2372	Nucleotide	Pyrimidine metabolism	cytidine 5'-monophosphate (5'-CMP)		0.33	0.3	0.21	0.25	0.3	0.36		8.7195e-07	8.3402e-06	4.8631e-07	1.0003e-05	1.8924e-06	4.467e-05	4.1539e-07	6.3472e-06	4.3272e-06	2.6905e-05	2.6976e-05	8.1437e-05		1.1827	1.2787	0.9067	1.3035	1.0712	0.7562	0.3916	0.2702		100	100	100	100	100	100	100	100		cytidine 5'-monophosphate (5'-CMP)	Nucleotide	Pyrimidine metabolism	282
	1219	219	573	Nucleotide	Pyrimidine metabolism	cytosine		1.82	1.41	1.83	1.76	1.53	1.3		0.0431	0.0098	0.1649	0.0487	0.0204	0.0056	0.0213	0.0046	0.0672	0.0189	0.2241	0.0613		0.7251	0.8749	1.0454	0.9352	0.9053	1.2271	1.32	1.5977		75	100	100	100	100	100	100	100		cytosine	Nucleotide	Pyrimidine metabolism	881
	1224	428	1505	Nucleotide	Pyrimidine metabolism	orotate		0.5	0.53	0.23	0.37	0.66	0.81		0.0004	0.0003	0.0014	0.0013	0.0025	0.0011	0.0158	0.0036	0.1278	0.0339	0.293	0.0775		4.1615	1.3427	0.4712	3.9015	0.8397	0.3836	2.0779	0.3114		100	100	100	100	100	100	100	100		orotate	Nucleotide	Pyrimidine metabolism	445
	1226	459	33442	Nucleotide	Pyrimidine metabolism	pseudouridine		0.42	0.39	1.06	0.95	0.91	0.56		0.0209	0.0054	0.0161	0.0075	0.6295	0.1218	0.7197	0.0979	0.5576	0.1246	0.0235	0.0091		1.4309	0.7893	0.9188	1.5606	0.8796	1.4811	0.6043	0.8349		100	100	100	100	100	100	100	100		pseudouridine	Nucleotide	Pyrimidine metabolism	821
	1227	510	2183	Nucleotide	Pyrimidine metabolism	thymidine		0.17	0.16	0.26	0.27	0.39	0.31		0.0003	0.0002	0.0003	0.0005	0.0003	0.0002	0.0002	0.0001	0.0011	0.0009	0.0002	0.0003		2.8711	1.1315	0.7624	3.0524	1.0791	0.9545	0.5001	0.2962		100	100	100	100	100	100	100	100		thymidine	Nucleotide	Pyrimidine metabolism	872
	1228	511	12023	Nucleotide	Pyrimidine metabolism	thymidine 5'-monophosphate		0.18	0.12	0.27	0.19	0.67	0.35		6.3174e-05	8.8797e-05	2.2399e-05	0.0001	5.1323e-05	0.0001	1.8121e-05	2.8853e-05	0.0358	0.0113	0.0004	0.0005		2.0908	1.2357	0.4993	3.1892	1.7592	0.9485	0.3782	0.3327		100	100	100	100	100	100	100	100		thymidine 5'-monophosphate	Nucleotide	Pyrimidine metabolism	1248
	1230	529	605	Nucleotide	Pyrimidine metabolism	uracil		0.4	0.54	0.1	0.3	0.17	0.53		2.0519e-05	4.4366e-05	0.0003	0.0005	2.9981e-06	4.467e-05	0.0004	0.0002	1.047e-05	5.2701e-05	0.0026	0.0016		2.4486	1.7074	0.9805	1.8459	0.5432	0.308	0.9896	0.1647		100	100	100	100	100	100	100	100		uracil	Nucleotide	Pyrimidine metabolism	825
	1231	531	606	Nucleotide	Pyrimidine metabolism	uridine		0.51	0.55	0.29	0.43	0.32	0.61		2.1042e-05	4.4366e-05	3.237e-05	0.0001	5.1693e-06	4.467e-05	0.0001	0.0001	2.6708e-05	8.383e-05	0.0013	0.0009		1.8372	1.1732	1.066	1.7196	0.7956	0.5591	0.9396	0.3438		100	100	100	100	100	100	100	100		uridine	Nucleotide	Pyrimidine metabolism	535
	1241	532	52444	Nucleotide	Pyrimidine metabolism	uridine 2'-monophosphate (2'-UMP)*		0.61	0.61	0.91	1.04	0.83	1.11		0.0254	0.0063	0.0178	0.0081	0.9072	0.1689	0.8587	0.1146	0.409	0.0948	0.6409	0.1475		2.715	0.8787	0.9577	2.7105	0.7688	0.7196	1.6574	0.7961		100	100	100	100	100	100	100	100		uridine 2'-monophosphate (2'-UMP)*	Nucleotide	Pyrimidine metabolism	100008975
	1239	533	39764	Nucleotide	Pyrimidine metabolism	uridine 3'-monophosphate (3'-UMP)		0.79	0.48	0.99	0.86	1.11	0.75		0.2603	0.0412	0.0079	0.0043	0.9934	0.1826	0.0315	0.0065	0.3945	0.0921	0.0274	0.0104		0.9293	0.9206	0.8226	1.531	1.0629	1.2181	0.7322	0.9139		100	100	100	100	100	100	100	100		uridine 3'-monophosphate (3'-UMP)	Nucleotide	Pyrimidine metabolism	106
	1233	534	2856	Nucleotide	Pyrimidine metabolism	uridine 5'-monophosphate (UMP)		0.98	0.71	0.46	0.47	0.53	0.62		0.6584	0.0929	0.0038	0.0024	0.0004	0.0003	0.0004	0.0002	0.0018	0.0012	0.0012	0.0009		0.6503	1.5534	1.3376	0.8998	1.5116	1.1565	0.6355	0.7139		100	100	100	100	100	100	100	100		uridine 5'-monophosphate (UMP)	Nucleotide	Pyrimidine metabolism	869
	1234	535	37137	Nucleotide	Pyrimidine metabolism	uridine-2',3'-cyclic monophosphate		1.11	0.77	1.88	1.94	2.43	1.61		0.4331	0.0634	0.0586	0.0214	0.0047	0.0017	0.0048	0.0014	0.0017	0.0012	0.0085	0.0039		1.1519	0.7566	0.5849	1.6519	0.7328	0.8791	1.2779	1.4187		100	100	100	100	100	100	100	100		uridine-2',3'-cyclic monophosphate	Nucleotide	Pyrimidine metabolism	75
	1265	166	37093	Peptide	Dipeptide	alanylleucine		1.41	1.19	0.74	0.76	0.65	0.67		0.0611	0.013	0.2769	0.0763	0.0345	0.0089	0.0093	0.0024	0.0136	0.0053	0.0024	0.0015		0.2403	1.2234	1.3883	0.2858	1.1877	1.3541	0.3398	0.9011		100	100	100	100	100	100	100	100		alanylleucine	Peptide	Dipeptide	100001890
	1276	206	18368	Peptide	Dipeptide	cys-gly, oxidized		3.46	1.61	0.61	1.11	1.37	2.91		0.0117	0.0035	0.0006	0.0007	0.0564	0.014	0.3286	0.0486	0.0758	0.0211	4.2298e-06	2.6603e-05		0.3517	1.9926	0.8823	0.7556	1.0957	0.4161	1.216	1.2109		100	100	100	100	100	100	100	100		cys-gly, oxidized	Peptide	Dipeptide	1224
	1288	294	36659	Peptide	Dipeptide	glycylisoleucine		1.03	0.99	0.63	0.78	0.79	0.9		0.6943	0.097	0.8937	0.1892	0.0009	0.0005	0.0119	0.0029	0.0437	0.0133	0.1654	0.0478		0.9733	1.3748	1.104	1.0108	1.1174	0.9707	1.0014	0.8697		100	100	100	100	100	100	100	100		glycylisoleucine	Peptide	Dipeptide	100001790
	1289	295	34398	Peptide	Dipeptide	glycylleucine		1.2	0.93	0.54	0.67	0.67	0.75		0.1501	0.0262	0.4263	0.1065	0.0006	0.0004	0.0015	0.0006	0.0071	0.0033	0.0064	0.0032		0.606	1.5478	1.2523	0.7861	1.2589	1.1249	0.7275	0.8418		100	100	100	100	100	100	100	100		glycylleucine	Peptide	Dipeptide	100001258
	1298	296	18357	Peptide	Dipeptide	glycylvaline		0.89	0.9	0.61	0.8	0.81	0.92		0.1668	0.0285	0.1629	0.0484	0.0001	0.0001	0.0092	0.0023	0.0095	0.004	0.2156	0.0594		1.14	1.2819	0.9605	1.1344	0.9748	0.8514	1.0156	0.7825		100	100	100	100	100	100	100	100		glycylvaline	Peptide	Dipeptide	100000487
	1340	326	40008	Peptide	Dipeptide	isoleucylglycine		1.31	1.32	0.94	1.09	0.73	0.79		0.1739	0.0295	0.162	0.0482	0.7306	0.1403	0.3571	0.0524	0.0089	0.0039	0.0243	0.0094		0.3093	1.2171	1.5644	0.3063	1.0566	1.4608	0.4039	1.1474		100	100	100	100	100	100	100	100		isoleucylglycine	Peptide	Dipeptide	100003169
	1464	334	48189	Peptide	Dipeptide	leucylglutamine*		1.42	1.72	0.91	0.85	0.66	0.79		0.1662	0.0284	0.0499	0.0187	0.5468	0.1088	0.0872	0.0154	0.0774	0.0215	0.1729	0.0493		0.1638	1.1367	1.5752	0.1349	1.2245	1.3094	0.2322	1.0378		100	100	100	100	100	100	100	100		leucylglutamine*	Peptide	Dipeptide	100003183
	1322	335	40045	Peptide	Dipeptide	leucylglycine		1.68	1.61	0.96	1.01	0.8	0.8		0.0471	0.0104	0.0648	0.0234	0.802	0.1525	0.8951	0.1186	0.0139	0.0053	0.0232	0.009		0.1456	1.0983	1.3122	0.1518	1.0417	1.3064	0.244	1.0493		100	100	100	100	100	100	100	100		leucylglycine	Peptide	Dipeptide	100003185
	1359	345	40020	Peptide	Dipeptide	lysylleucine		1.67	0.9	0.73	0.61	0.52	0.37		0.1372	0.0244	0.4794	0.1167	0.2667	0.0572	0.0292	0.0061	0.0045	0.0024	0.0006	0.0006		0.0433	1.0757	1.5098	0.08	1.2792	2.1214	0.0721	0.7836		75	100	100	100	100	100	100	100		lysylleucine	Peptide	Dipeptide	100003196
	1263	447	41374	Peptide	Dipeptide	phenylalanylalanine		1	1	0.89	0.77	0.5	0.29						0.5229	0.1047	0.2599	0.04	0.0127	0.0051	0.0001	0.0002		0.5591	0.8038	1.4304	0.5591	0.925	2.4588	0.5591	0.7157		0	75	100	0	100	100	0	100		phenylalanylalanine	Peptide	Dipeptide	100003589
	1390	448	41370	Peptide	Dipeptide	phenylalanylglycine		1.61	1.44	1.23	1.14	0.74	0.73		0.069	0.014	0.1381	0.0427	0.1548	0.0351	0.1848	0.0299	0.0222	0.0078	0.0195	0.0079		0.1127	0.9493	1.5711	0.1265	1.0226	1.6009	0.1818	1.1694		100	100	100	100	100	100	100	100		phenylalanylglycine	Peptide	Dipeptide	100003588
	1282	458	40703	Peptide	Dipeptide	prolylglycine		1.63	1.23	0.72	0.8	0.95	1.06		0.0052	0.0018	0.1015	0.033	0.0166	0.0047	0.0053	0.0015	0.7487	0.1573	0.3599	0.0922		0.5286	1.4853	1.1238	0.6995	1.3344	1.0085	0.8631	1.0677		100	100	100	100	100	100	100	100		prolylglycine	Peptide	Dipeptide	100003674
	1348	509	31530	Peptide	Dipeptide	threonylphenylalanine		1.32	1.17	0.73	0.88	0.59	0.73		0.067	0.0138	0.1435	0.0439	0.0267	0.007	0.1662	0.0273	0.0017	0.0012	0.0065	0.0032		0.3232	1.2874	1.5915	0.3641	1.0762	1.2975	0.4271	0.9442		100	100	100	100	100	100	100	100		threonylphenylalanine	Peptide	Dipeptide	100001125
	1408	537	42079	Peptide	Dipeptide	valylglutamine		1.2	1.38	0.94	1.09	0.74	0.82		0.2264	0.037	0.0641	0.0232	0.5974	0.117	0.2687	0.041	0.0018	0.0012	0.0582	0.0196		0.28	1.1204	1.4235	0.2426	0.9671	1.282	0.3347	1.0543		100	100	100	100	100	100	100	100		valylglutamine	Peptide	Dipeptide	100003640
	1249	538	40475	Peptide	Dipeptide	valylglycine		1.28	1.43	0.68	0.8	0.67	0.71		0.1496	0.0262	0.0577	0.0212	0.0111	0.0034	0.021	0.0045	0.005	0.0025	0.0028	0.0017		0.3456	1.3175	1.3319	0.3096	1.1234	1.2728	0.442	0.8989		100	100	100	100	100	100	100	100		valylglycine	Peptide	Dipeptide	100003641
	1366	539	39994	Peptide	Dipeptide	valylleucine		1.21	1.14	1.12	1.03	0.77	0.74		0.1767	0.0299	0.318	0.0854	0.2873	0.0614	0.6076	0.0841	0.0133	0.0053	0.0004	0.0005		0.2551	0.9617	1.4011	0.2698	1.0501	1.4628	0.3083	1.0805		100	100	100	100	100	100	100	100		valylleucine	Peptide	Dipeptide	100003210
	1623	134	21133	Secondary metabolism	Benzenoids	4-hydroxybenzoate		0.43	0.41	0.15	0.21	0.27	0.41		2.8683e-05	5.1404e-05	1.8775e-05	0.0001	6.3116e-06	4.467e-05	6.1162e-06	2.0405e-05	1.4716e-06	1.9309e-05	0.0011	0.0009		1.1901	1.6626	0.9178	1.2547	1.1383	0.597	0.5096	0.2436		100	100	100	100	100	100	100	100		4-hydroxybenzoate	Secondary metabolism	Benzenoids	100000862
	1633	312	38160	Secondary metabolism	Benzenoids	hydroquinone beta-D-glucopyranoside		0.59	0.65	0.36	0.48	0.3	0.42		0.0547	0.012	0.0905	0.03	0.0004	0.0003	0.0011	0.0005	2.6339e-05	8.383e-05	0.0001	0.0002		0.3952	1.7424	2.1274	0.3569	1.3015	1.4938	0.2337	0.6284		100	100	100	100	100	100	100	100		hydroquinone beta-D-glucopyranoside	Secondary metabolism	Benzenoids	100002220
	1640	481	1515	Secondary metabolism	Benzenoids	salicylate		0.67	1.54	0.56	1.16	0.58	1.15		0.0977	0.0186	0.15	0.0453	0.0437	0.0111	0.6768	0.0928	0.053	0.0157	0.7177	0.1609		1.273	1.8254	1.7534	0.5536	0.88	0.8857	0.8535	1.0223		100	100	100	100	100	100	100	100		salicylate	Secondary metabolism	Benzenoids	501
	1649	247	20881	Secondary metabolism	Fatty acid and sugar derivatives	galactarate (mucic acid)		0.67	1.44	0.55	1.84	0.8	2.11		0.0098	0.003	0.0182	0.0082	0.0096	0.0031	1.238e-05	2.4092e-05	0.0305	0.0099	3.0197e-06	2.5639e-05		1.2457	1.9096	1.3292	0.5815	0.5754	0.5001	0.8347	1.0568		100	100	100	100	100	100	100	100		galactarate (mucic acid)	Secondary metabolism	Fatty acid and sugar derivatives	100000881
	1777	136	36770	Secondary metabolism	Phenylpropanoids	4-hydroxycinnamate		0.52	0.54	0.24	0.38	0.36	0.52		0.0174	0.0047	0.0024	0.0018	0.0004	0.0003	0.0014	0.0006	0.0002	0.0003	0.0025	0.0016		1.2024	1.8006	1.194	1.1576	1.1253	0.8256	0.6292	0.4329		100	100	100	100	100	100	100	100		4-hydroxycinnamate	Secondary metabolism	Phenylpropanoids	100001675
	1782	240	35630	Secondary metabolism	Phenylpropanoids	ferulate		1.85	1.66	0.55	0.85	0.44	0.65		0.0415	0.0095	0.0793	0.0273	0.012	0.0036	0.2113	0.0336	0.0013	0.001	0.021	0.0083		0.4042	1.5451	1.9128	0.4512	0.995	1.304	0.747	0.8493		100	100	100	100	100	100	100	100		ferulate	Secondary metabolism	Phenylpropanoids	100001542
	1813	273	48729	Secondary metabolism	Phenylpropanoids	gentisic acid-5-glucoside		1.93	1.13	1.74	1.04	1.4	0.86		0.2372	0.0383	0.8823	0.1886	0.0451	0.0114	0.9701	0.127	0.1764	0.045	0.4325	0.1064		0.4782	0.8359	1.0391	0.8178	1.392	1.6837	0.9243	1.4542		100	100	100	100	100	100	100	100		gentisic acid-5-glucoside	Secondary metabolism	Phenylpropanoids	100006372
	1812	540	35639	Secondary metabolism	Phenylpropanoids	vanillate		0.76	0.71	0.32	0.36	0.38	0.62		0.2435	0.0391	0.2762	0.0763	0.0032	0.0013	9.694e-05	8.6224e-05	0.0012	0.001	0.0104	0.0046		0.6454	1.4472	1.2117	0.6927	1.2801	0.7354	0.4905	0.4569		100	100	100	75	100	100	25	0		vanillate	Secondary metabolism	Phenylpropanoids	100001634
	1879	120	531	Secondary metabolism	Terpenoids	3-hydroxy-3-methylglutarate		1.02	0.51	0.88	0.58	0.62	0.44		0.9595	0.1274	0.0165	0.0076	0.2551	0.0551	0.0008	0.0004	0.0023	0.0015	0.0002	0.0003		0.5367	0.8333	1.1751	1.0725	1.2708	1.6546	0.5494	0.7321		100	100	100	100	100	100	100	100		3-hydroxy-3-methylglutarate	Secondary metabolism	Terpenoids	112
[truncated: 7 more columns]

## Sheet: Cotton Box Plots
	Biochemical Name	Super Pathway	Sub Pathway	Pathway Order	Alpha	Comp ID
	13-HODE + 9-HODE	Lipids	Oxylipins	672	19	37752
	1-linoleoylglycerol (18:2)	Lipids	Glycerolipids	709	30	27447
	1-linoleoyl-GPC (18:2)	Lipids	Phospholipids	770	32	34419
	1-linoleoyl-GPE (18:2)*	Lipids	Phospholipids	771	33	36600
	1-linoleoyl-GPI (18:2)*	Lipids	Phospholipids	772	35	36594
	1-methylhistidine	Amino acid	Glutamate family (alpha-ketoglutarate derived)	220	39	30460
	1-oleoyl-2-linoleoyl-GPI (18:1/18:2)*	Lipids	Phospholipids	855	45	52451
	1-oleoyl-GPA (18:1)	Lipids	Phospholipids	837	46	36812
	1-oleoyl-GPC (18:1)	Lipids	Phospholipids	775	47	48258
	1-oleoyl-GPE (18:1)	Lipids	Phospholipids	776	48	35628
	1-oleoyl-GPG (18:1)*	Lipids	Phospholipids	927	49	45968
	1-oleoyl-GPI (18:1)*	Lipids	Phospholipids	777	50	36602
	1-palmitoyl-2-linoleoyl-GPC (16:0/18:2)	Lipids	Phospholipids	852	62	42446
	1-palmitoyl-2-linoleoyl-GPE (16:0/18:2)	Lipids	Phospholipids	853	63	42449
	1-palmitoyl-2-linoleoyl-GPI (16:0/18:2)	Lipids	Phospholipids	854	65	52450
	1-palmitoyl-2-oleoyl-GPC (16:0/18:1)	Lipids	Phospholipids	858	68	52461
	1-palmitoyl-2-oleoyl-GPE (16:0/18:1)	Lipids	Phospholipids	857	69	19263
	1-palmitoylglycerol (16:0)	Lipids	Glycerolipids	712	74	21127
	1-palmitoyl-GPA (16:0)	Lipids	Phospholipids	779	75	34428
	1-palmitoyl-GPC (16:0)	Lipids	Phospholipids	780	76	33955
	1-palmitoyl-GPE (16:0)	Lipids	Phospholipids	781	77	35631
	1-palmitoyl-GPG (16:0)*	Lipids	Phospholipids	822	78	45970
	1-palmitoyl-GPI (16:0)	Lipids	Phospholipids	782	79	35305
	2,3-dihydroxyisovalerate	Amino acid	Branched Chain Amino Acids (pyruvate derived)	263	86	38276
	2-aminoadipate	Amino acid	Aspartate family (OAA derived)	112	87	6146
	2-aminoheptanoate	Lipids	Fatty acid, Amino	1010	88	43761
	2'-deoxyadenosine	Nucleotide	Purine metabolism	1148	90	1553
	2'-deoxyadenosine 5'-monophosphate	Nucleotide	Purine metabolism	1197	91	46333
	2'-deoxycytidine	Nucleotide	Pyrimidine metabolism	1204	92	15949
	2'-deoxycytidine 5'-monophosphate	Nucleotide	Pyrimidine metabolism	1205	93	533
	2'-deoxyguanosine	Nucleotide	Purine metabolism	1149	94	1411
	2'-deoxyguanosine 5'-monophosphate (dGMP)	Nucleotide	Purine metabolism	1150	95	35662
	2'-deoxyinosine	Nucleotide	Purine metabolism	1151	96	15076
	2-hydroxy-3-methylvalerate	Amino acid	Branched Chain Amino Acids (pyruvate derived)	266	98	36746
	2-hydroxyadipate	Amino acid	Aspartate family (OAA derived)	153	99	31934
	2-hydroxybutyrate/2-hydroxyisobutyrate	Lipids	Free fatty acid	646	100	52281
	2-hydroxyglutarate	Lipids	Free fatty acid	647	102	52294
	2-hydroxypalmitate	Lipids	Free fatty acid	565	104	35675
	2-hydroxystearate	Lipids	Free fatty acid	566	105	17945
	2-isopropylmalate	Amino acid	Branched Chain Amino Acids (pyruvate derived)	287	106	15667
	2-linoleoylglycerol (18:2)	Lipids	Glycerolipids	716	107	32506
	2'-O-methyladenosine	Nucleotide	Purine metabolism	1194	110	42607
	2-oxindole-3-acetate	Hormone metabolism	Auxin metabolism	1569	111	40479
	3-(4-hydroxyphenyl)lactate	Amino acid	Aromatic amino acid metabolism (PEP derived)	32	116	32197
	3-deoxyoctulosonate	Carbohydrate	Sucrose, glucose,fructose metabolism	474	118	43805
	3-hydroxy-3-methylglutarate	Secondary metabolism	Terpenoids	1879	120	531
	3-hydroxybutyrate (BHBA)	Lipids	Free fatty acid	653	121	542
	3-hydroxyisobutyrate	Amino acid	Branched Chain Amino Acids (pyruvate derived)	268	122	1549
	3-methoxytyrosine	Amino acid	Aromatic amino acid metabolism (PEP derived)	37	123	12017
	3-methyl-2-oxobutyrate	Amino acid	Branched Chain Amino Acids (pyruvate derived)	269	124	44526
	3-methyl-2-oxovalerate	Amino acid	Branched Chain Amino Acids (pyruvate derived)	270	125	15676
	3-methylglutaconate	Amino acid	Branched Chain Amino Acids (pyruvate derived)	297	127	38667
	3-methylhistidine	Amino acid	Glutamate family (alpha-ketoglutarate derived)	176	129	15677
	3-ureidopropionate	Nucleotide	Pyrimidine metabolism	1240	131	3155
	4-acetamidobutanoate	Amino acid	Glutamate family (alpha-ketoglutarate derived)	177	132	1558
	4-guanidinobutanoate	Amino acid	Glutamate family (alpha-ketoglutarate derived)	229	133	15681
	4-hydroxybenzoate	Secondary metabolism	Benzenoids	1623	134	21133
	4-hydroxycinnamate	Secondary metabolism	Phenylpropanoids	1777	136	36770
	4-hydroxyphenylpyruvate	Amino acid	Aromatic amino acid metabolism (PEP derived)	39	138	1669
	4-imidazoleacetate	Amino acid	Glutamate family (alpha-ketoglutarate derived)	231	139	32349
	4-methyl-2-oxopentanoate	Amino acid	Branched Chain Amino Acids (pyruvate derived)	271	140	22116
	5-methyl-2'-deoxycytidine	Nucleotide	Pyrimidine metabolism	1215	141	38159
	5-methylcytidine	Nucleotide	Pyrimidine metabolism	1212	142	22119
	5-methylthioadenosine (MTA)	Amino acid	Amines and polyamines	305	144	1419
	5-methyluridine (ribothymidine)	Nucleotide	Pyrimidine metabolism	1214	145	35136
	5-oxoproline	Amino acid	Glutathione metabolism	319	146	1494
	6-oxopiperidine-2-carboxylate	Amino acid	Aspartate family (OAA derived)	149	147	43231
	7-methylguanosine	Nucleotide	Purine metabolism	1154	149	31580
	8-hydroxyoctanoate	Lipids	Free fatty acid	577	150	21239
	acetylphosphate	Cofactors, Prosthetic Groups, Electron Carriers	Oxidative phosphorylation	1089	153	15488
	aconitate [cis or trans]	Carbohydrate	TCA cycle	369	154	46173
	adenine	Nucleotide	Purine metabolism	1156	155	554
	adenosine	Nucleotide	Purine metabolism	1157	156	555
	adenosine 2'-monophosphate (2'-AMP)	Nucleotide	Purine metabolism	1158	157	36815
	adenosine 3'-monophosphate (3'-AMP)	Nucleotide	Purine metabolism	1160	158	35142
	adenosine 5'-monophosphate (AMP)	Nucleotide	Purine metabolism	1162	160	32342
	adenosine-2',3'-cyclic monophosphate	Nucleotide	Purine metabolism	1163	161	37467
	adipate	Lipids	Fatty acid, Dicarboxylate	1030	163	21134
	agmatine	Amino acid	Amines and polyamines	306	164	15496
	alanine	Amino acid	Aspartate family (OAA derived)	114	165	1126
	alanylleucine	Peptide	Dipeptide	1265	166	37093
	allantoic acid	Nucleotide	Purine metabolism	1166	167	33434
	allantoin	Nucleotide	Purine metabolism	1167	168	1107
	allo-threonine	Amino acid	Aspartate family (OAA derived)	115	169	15142
	alpha-hydroxycaproate	Lipids	Free fatty acid	635	170	37073
	alpha-hydroxyisocaproate	Amino acid	Branched Chain Amino Acids (pyruvate derived)	274	171	22132
	alpha-hydroxyisovalerate	Amino acid	Branched Chain Amino Acids (pyruvate derived)	275	172	46537
	alpha-ketoglutarate	Carbohydrate	TCA cycle	370	173	528
	alpha-tocopherol	Cofactors, Prosthetic Groups, Electron Carriers	Tocopherol metabolism	1121	174	1561
	arabitol/xylitol	Carbohydrate	Amino sugar and nucleotide sugar	443	175	48885
	arabonate/xylonate	Carbohydrate	Amino sugar and nucleotide sugar	440	176	48255
	arachidate (20:0)	Lipids	Free fatty acid	579	177	1118
	arginine	Amino acid	Glutamate family (alpha-ketoglutarate derived)	182	178	1638
	asparagine	Amino acid	Aspartate family (OAA derived)	116	181	512
	aspartate	Amino acid	Aspartate family (OAA derived)	117	182	443
	azelate (nonanedioate)	Lipids	Fatty acid, Dicarboxylate	1016	183	18362
	beta-alanine	Nucleotide	Pyrimidine metabolism	1236	186	55
	beta-hydroxyisovalerate	Amino acid	Branched Chain Amino Acids (pyruvate derived)	276	188	12129
	betaine	Amino acid	Serine family (phosphoglycerate derived)	2	189	3141
	beta-sitosterol	Lipids	Sterols	951	191	27414
	campesterol	Lipids	Sterols	954	194	33997
	caproate (6:0)	Lipids	Free fatty acid	584	196	32489
	caprylate (8:0)	Lipids	Free fatty acid	585	197	32492
	carboxyethyl-GABA	Amino acid	Glutamate family (alpha-ketoglutarate derived)	184	198	40007
	choline	Lipids	Phospholipids	888	200	15506
	choline phosphate	Lipids	Phospholipids	889	201	34396
	citrate	Carbohydrate	TCA cycle	372	203	1564
	citrulline	Amino acid	Glutamate family (alpha-ketoglutarate derived)	185	204	2132
	cys-gly, oxidized	Peptide	Dipeptide	1276	206	18368
	cysteine	Amino acid	Serine family (phosphoglycerate derived)	4	208	1868
	cysteine-glutathione disulfide	Amino acid	Glutathione metabolism	320	209	35159
	cystine	Amino acid	Serine family (phosphoglycerate derived)	6	211	56
	cytidine	Nucleotide	Pyrimidine metabolism	1216	212	514
	cytidine 2',3'-cyclic monophosphate	Nucleotide	Pyrimidine metabolism	1220	213	37465
	cytidine 3'-monophosphate (3'-CMP)	Nucleotide	Pyrimidine metabolism	1218	214	2959
	cytidine 5'-monophosphate (5'-CMP)	Nucleotide	Pyrimidine metabolism	1217	216	2372
	cytosine	Nucleotide	Pyrimidine metabolism	1219	219	573
	dehydroascorbate	Cofactors, Prosthetic Groups, Electron Carriers	Ascorbate metabolism	1103	220	1659
	deoxycarnitine	Cofactors, Prosthetic Groups, Electron Carriers	Carnitine metabolism	1095	221	36747
	dimethylarginine (SDMA + ADMA)	Amino acid	Glutamate family (alpha-ketoglutarate derived)	187	229	36808
	eicosenoate (20:1)	Lipids	Free fatty acid	595	233	33587
	ergothioneine	Amino acid	Glutamate family (alpha-ketoglutarate derived)	188	235	37459
	erythronate*	Carbohydrate	Amino sugar and nucleotide sugar	408	237	42420
	ethanolamine	Lipids	Phospholipids	890	239	1497
	ferulate	Secondary metabolism	Phenylpropanoids	1782	240	35630
	flavin adenine dinucleotide (FAD)	Cofactors, Prosthetic Groups, Electron Carriers	Riboflavin and FAD metabolism	1096	241	2134
	flavin mononucleotide (FMN)	Cofactors, Prosthetic Groups, Electron Carriers	Riboflavin and FAD metabolism	1098	242	15797
	fructose	Carbohydrate	Sucrose, glucose,fructose metabolism	479	243	48195
	fructose-6-phosphate	Carbohydrate	Glycolysis	353	244	12021
	fucosterol	Lipids	Sterols	962	245	21187
	fumarate	Carbohydrate	TCA cycle	373	246	1643
	galactarate (mucic acid)	Secondary metabolism	Fatty acid and sugar derivatives	1649	247	20881
	galactinol	Carbohydrate	Sucrose, glucose,fructose metabolism	481	248	34706
	galactitol (dulcitol)	Carbohydrate	Sucrose, glucose,fructose metabolism	482	249	1117
	galactonate	Carbohydrate	Sucrose, glucose,fructose metabolism	483	250	27719
	galactose 1-phosphate	Carbohydrate	Sucrose, glucose,fructose metabolism	485	251	15706
	gamma-aminobutyrate (GABA)	Amino acid	Glutamate family (alpha-ketoglutarate derived)	189	255	1416
	gamma-glutamylalanine	Amino acid	Glutathione metabolism	330	256	37063
	gamma-glutamylglutamate	Amino acid	Glutathione metabolism	331	259	36738
	gamma-glutamylglutamine	Amino acid	Glutathione metabolism	332	260	2730
	gamma-glutamylglycine	Amino acid	Glutathione metabolism	333	261	33949
	gamma-glutamylisoleucine*	Amino acid	Glutathione metabolism	335	263	34456
	gamma-glutamylleucine	Amino acid	Glutathione metabolism	336	264	18369
	gamma-glutamylmethionine	Amino acid	Glutathione metabolism	338	265	44872
	gamma-glutamylphenylalanine	Amino acid	Glutathione metabolism	339	266	33422
	gamma-glutamylthreonine	Amino acid	Glutathione metabolism	340	268	33364
	gamma-glutamyltryptophan	Amino acid	Glutathione metabolism	341	269	33947
	gamma-glutamyltyrosine	Amino acid	Glutathione metabolism	342	270	2734
	gamma-glutamylvaline	Amino acid	Glutathione metabolism	343	271	43829
	gentisic acid-5-glucoside	Secondary metabolism	Phenylpropanoids	1813	273	48729
	gluconate	Carbohydrate	Sucrose, glucose,fructose metabolism	546	275	587
	glucose	Carbohydrate	Glycolysis	355	276	48152
	glucose 6-phosphate	Carbohydrate	Glycolysis	357	277	31260
	glucuronate	Carbohydrate	Glycolysis	358	278	15443
	glutamate	Amino acid	Glutamate family (alpha-ketoglutarate derived)	190	279	57
	glutamate, gamma-methyl ester	Amino acid	Glutamate family (alpha-ketoglutarate derived)	191	280	33487
	glutamine	Amino acid	Glutamate family (alpha-ketoglutarate derived)	192	281	53
	glutarate (pentanedioate)	Lipids	Fatty acid, Dicarboxylate	1028	283	396
	glutathione, oxidized (GSSG)	Amino acid	Glutathione metabolism	322	284	27727
	glutathione, reduced (GSH)	Amino acid	Glutathione metabolism	323	285	2127
	glycerate	Carbohydrate	Photorespiration	398	286	1572
	glycerol	Lipids	Glycerolipids	729	287	15122
	glycerol 3-phosphate	Lipids	Phospholipids	794	288	43847
	glycerophosphoethanolamine	Lipids	Phospholipids	795	289	37455
	glycerophosphoglycerol	Lipids	Phospholipids	880	290	48857
	glycerophosphoinositol*	Lipids	Phospholipids	839	291	47155
	glycerophosphorylcholine (GPC)	Lipids	Phospholipids	796	292	15990
	glycine	Amino acid	Serine family (phosphoglycerate derived)	8	293	58
	glycylisoleucine	Peptide	Dipeptide	1288	294	36659
	glycylleucine	Peptide	Dipeptide	1289	295	34398
	glycylvaline	Peptide	Dipeptide	1298	296	18357
	guanine	Nucleotide	Purine metabolism	1168	299	32352
	guanosine	Nucleotide	Purine metabolism	1169	300	1573
	guanosine 3'-monophosphate (3'-GMP)	Nucleotide	Purine metabolism	1189	301	39786
	guanosine 5'- monophosphate (5'-GMP)	Nucleotide	Purine metabolism	1171	302	2849
	guanosine-2',3'-cyclic monophosphate	Nucleotide	Purine metabolism	1172	303	37139
	gulonate*	Cofactors, Prosthetic Groups, Electron Carriers	Ascorbate metabolism	1110	304	46957
	histidine	Amino acid	Glutamate family (alpha-ketoglutarate derived)	194	306	59
	homocitrulline	Amino acid	Glutamate family (alpha-ketoglutarate derived)	196	309	22138
	homoserine	Amino acid	Aspartate family (OAA derived)	120	310	18351
	homoserine lactone	Amino acid	Aspartate family (OAA derived)	121	311	15696
	hydroquinone beta-D-glucopyranoside	Secondary metabolism	Benzenoids	1633	312	38160
	hypoxanthine	Nucleotide	Purine metabolism	1174	314	3127
	imidazole propionate	Amino acid	Glutamate family (alpha-ketoglutarate derived)	218	316	40730
	indoleacetate	Hormone metabolism	Auxin metabolism	1564	317	27513
	inosine	Nucleotide	Purine metabolism	1175	319	1123
	inosine 5'-monophosphate (IMP)	Nucleotide	Purine metabolism	1176	320	2133
	inositol 1-phosphate (I1P)	Carbohydrate	Inositol metabolism	456	321	43849
	isocitrate	Carbohydrate	TCA cycle	374	323	12110
	isoleucine	Amino acid	Branched Chain Amino Acids (OAA derived)	249	325	1125
	isoleucylglycine	Peptide	Dipeptide	1340	326	40008
	kynurenate	Amino acid	Aromatic amino acid metabolism (PEP derived)	51	329	1417
	lactate	Carbohydrate	Glycolysis	360	330	527
	leucine	Amino acid	Branched Chain Amino Acids (pyruvate derived)	277	332	60
	leucylglutamine*	Peptide	Dipeptide	1464	334	48189
	leucylglycine	Peptide	Dipeptide	1322	335	40045
	linoleate (18:2n6)	Lipids	Free fatty acid	607	336	1105
	linolenate [alpha or gamma; (18:3n3 or 6)]	Lipids	Free fatty acid	608	337	34035
	lysine	Amino acid	Aspartate family (OAA derived)	123	344	1301
	lysylleucine	Peptide	Dipeptide	1359	345	40020
	malate	Carbohydrate	TCA cycle	375	346	1303
	maleate	Carbohydrate	TCA cycle	376	347	20676
	malonate	Lipids	Fatty acid, Dicarboxylate	1019	348	15872
	maltose	Carbohydrate	Sucrose, glucose,fructose metabolism	497	349	15586
	maltotriose	Carbohydrate	Sucrose, glucose,fructose metabolism	500	350	44688
	mannitol/sorbitol	Carbohydrate	Sucrose, glucose,fructose metabolism	491	351	46142
	mannose-6-phosphate	Carbohydrate	Sucrose, glucose,fructose metabolism	506	353	1469
	methionine	Amino acid	Aspartate family (OAA derived)	124	356	1302
	methionine sulfoxide	Amino acid	Aspartate family (OAA derived)	125	357	18374
	methyl glucopyranoside (alpha + beta)	Carbohydrate	Sucrose, glucose,fructose metabolism	544	358	46144
	methylphosphate	Cofactors, Prosthetic Groups, Electron Carriers	Oxidative phosphorylation	1090	359	37070
	methylsuccinate	Amino acid	Branched Chain Amino Acids (pyruvate derived)	280	360	15745
	myo-inositol	Carbohydrate	Inositol metabolism	459	361	1124
	N1-methyladenosine	Nucleotide	Purine metabolism	1177	365	15650
	N1-methylguanosine	Nucleotide	Purine metabolism	1178	366	31609
	N2,N2-dimethylguanosine	Nucleotide	Purine metabolism	1180	368	35137
	N2-methylguanosine	Nucleotide	Purine metabolism	1181	369	35133
	N6-acetyllysine	Amino acid	Aspartate family (OAA derived)	127	371	36752
	N6-carbamoylthreonyladenosine	Nucleotide	Purine metabolism	1164	372	35157
	N6-carboxymethyllysine	Amino acid	Aspartate family (OAA derived)	158	373	36713
	N6-methyladenosine	Nucleotide	Purine metabolism	1183	375	37114
	N6-succinyladenosine	Nucleotide	Purine metabolism	1196	376	48130
	N-acetylalanine	Amino acid	Aspartate family (OAA derived)	130	377	1585
	N-acetylarginine	Amino acid	Glutamate family (alpha-ketoglutarate derived)	197	378	33953
	N-acetylasparagine	Amino acid	Aspartate family (OAA derived)	131	379	33942
	N-acetylaspartate (NAA)	Amino acid	Aspartate family (OAA derived)	132	380	22185
	N-acetyl-beta-alanine	Amino acid	Aspartate family (OAA derived)	133	382	37432
	N-acetyl-glucosamine 1-phosphate	Carbohydrate	Amino sugar and nucleotide sugar	418	383	15741
	N-acetylglucosamine 6-phosphate	Carbohydrate	Amino sugar and nucleotide sugar	419	384	15107
	N-acetylglutamate	Amino acid	Glutamate family (alpha-ketoglutarate derived)	198	387	15720
	N-acetylglutamine	Amino acid	Glutamate family (alpha-ketoglutarate derived)	199	388	33943
	N-acetylisoleucine	Amino acid	Branched Chain Amino Acids (pyruvate derived)	281	389	33967
	N-acetylleucine	Amino acid	Branched Chain Amino Acids (pyruvate derived)	282	390	1587
	N-acetylmethionine	Amino acid	Aspartate family (OAA derived)	134	391	1589
	N-acetylphenylalanine	Amino acid	Aromatic amino acid metabolism (PEP derived)	54	393	33950
	N-acetylproline	Amino acid	Glutamate family (alpha-ketoglutarate derived)	202	394	34387
	N-acetylputrescine	Amino acid	Amines and polyamines	313	395	37496
	N-acetylserine	Amino acid	Serine family (phosphoglycerate derived)	13	396	37076
	N-acetyltaurine	Amino acid	Serine family (phosphoglycerate derived)	23	397	48187
	N-acetylvaline	Amino acid	Branched Chain Amino Acids (pyruvate derived)	283	399	1591
	N-delta-acetylornithine	Amino acid	Glutamate family (alpha-ketoglutarate derived)	224	402	43249
	N-formylmethionine	Amino acid	Aspartate family (OAA derived)	136	404	2829
	N-formylphenylalanine	Amino acid	Aromatic amino acid metabolism (PEP derived)	91	405	48433
	nicotianamine	Amino acid	Amines and polyamines	314	406	43026
	nicotinamide	Cofactors, Prosthetic Groups, Electron Carriers	Nicotinate and nicotinamide metabolism	1064	407	594
	nicotinamide adenine dinucleotide (NAD+)	Cofactors, Prosthetic Groups, Electron Carriers	Nicotinate and nicotinamide metabolism	1065	408	5278
	nicotinamide ribonucleotide (NMN)	Cofactors, Prosthetic Groups, Electron Carriers	Nicotinate and nicotinamide metabolism	1069	409	22152
	nicotinamide riboside	Cofactors, Prosthetic Groups, Electron Carriers	Nicotinate and nicotinamide metabolism	1070	410	33013
	nicotinate	Cofactors, Prosthetic Groups, Electron Carriers	Nicotinate and nicotinamide metabolism	1071	411	1504
	nicotinate ribonucleoside	Cofactors, Prosthetic Groups, Electron Carriers	Nicotinate and nicotinamide metabolism	1073	412	33471
	N-methylglutamate	Amino acid	Glutamate family (alpha-ketoglutarate derived)	216	413	31532
	N-methylpipecolate	Amino acid	Aspartate family (OAA derived)	157	414	47101
	N-methylproline	Amino acid	Glutamate family (alpha-ketoglutarate derived)	211	415	37431
	N-monomethylarginine	Amino acid	Glutamate family (alpha-ketoglutarate derived)	228	416	43586
	ophthalmate	Amino acid	Glutathione metabolism	324	426	34592
	ornithine	Amino acid	Glutamate family (alpha-ketoglutarate derived)	203	427	1493
	orotate	Nucleotide	Pyrimidine metabolism	1224	428	1505
	O-sulfo-L-tyrosine	Amino acid	Aromatic amino acid metabolism (PEP derived)	82	429	45413
	oxalate (ethanedioate)	Carbohydrate	Photorespiration	394	430	20694
	palmitate (16:0)	Lipids	Free fatty acid	619	431	1336
	pantothenate	Cofactors, Prosthetic Groups, Electron Carriers	CoA metabolism	1057	440	1508
	phenethylamine	Amino acid	Aromatic amino acid metabolism (PEP derived)	60	443	12142
	phenylalanine	Amino acid	Aromatic amino acid metabolism (PEP derived)	63	446	64
	phenylalanylalanine	Peptide	Dipeptide	1263	447	41374
	phenylalanylglycine	Peptide	Dipeptide	1390	448	41370
	phenylpyruvate	Amino acid	Aromatic amino acid metabolism (PEP derived)	65	449	566
	phosphate	Cofactors, Prosthetic Groups, Electron Carriers	Oxidative phosphorylation	1091	450	42109
	phosphoethanolamine	Lipids	Phospholipids	803	452	1600
	phytosphingosine	Lipids	Sphingolipid	938	453	1510
	pimelate (heptanedioate)	Lipids	Fatty acid, Dicarboxylate	1020	454	15704
	pipecolate	Amino acid	Aspartate family (OAA derived)	138	455	1444
	proline	Amino acid	Glutamate family (alpha-ketoglutarate derived)	205	457	1898
	prolylglycine	Peptide	Dipeptide	1282	458	40703
	pseudouridine	Nucleotide	Pyrimidine metabolism	1226	459	33442
	putrescine	Amino acid	Amines and polyamines	307	460	1408
	pyridoxal	Cofactors, Prosthetic Groups, Electron Carriers	Vitamin B metabolism (B6 or B12)	1131	461	1651
	pyridoxate	Cofactors, Prosthetic Groups, Electron Carriers	Vitamin B metabolism (B6 or B12)	1134	465	31555
	pyridoxine (Vitamin B6)	Cofactors, Prosthetic Groups, Electron Carriers	Vitamin B metabolism (B6 or B12)	1135	466	608
	pyroglutamine*	Amino acid	Glutamate family (alpha-ketoglutarate derived)	206	467	46225
	pyruvate	Carbohydrate	Glycolysis	363	468	48990
	quinate	Amino acid	Aromatic amino acid metabolism (PEP derived)	66	470	18335
	raffinose	Carbohydrate	Sucrose, glucose,fructose metabolism	514	472	586
	ribitol	Carbohydrate	Amino sugar and nucleotide sugar	422	473	15772
	riboflavin (Vitamin B2)	Cofactors, Prosthetic Groups, Electron Carriers	Riboflavin and FAD metabolism	1097	474	1827
	ribonate	Carbohydrate	Amino sugar and nucleotide sugar	423	475	27731
	ribose	Carbohydrate	Amino sugar and nucleotide sugar	424	476	1471
	ribulose/xylulose	Carbohydrate	Amino sugar and nucleotide sugar	446	477	54671
	saccharopine	Amino acid	Aspartate family (OAA derived)	141	478	1495
	S-adenosylhomocysteine (SAH)	Amino acid	Aspartate family (OAA derived)	142	479	42382
	S-adenosylmethionine (SAM)	Amino acid	Aspartate family (OAA derived)	143	480	15915
	salicylate	Secondary metabolism	Benzenoids	1640	481	1515
	S-carboxymethyl-L-cysteine	Amino acid	Serine family (phosphoglycerate derived)	19	482	47897
	serine	Amino acid	Serine family (phosphoglycerate derived)	16	485	1648
	shikimate	Amino acid	Aromatic amino acid metabolism (PEP derived)	68	486	15144
	S-methylcysteine	Amino acid	Serine family (phosphoglycerate derived)	18	488	39592
	S-methylglutathione	Amino acid	Glutathione metabolism	325	489	33944
	S-methylmethionine	Amino acid	Aspartate family (OAA derived)	160	490	38127
	spermidine	Amino acid	Amines and polyamines	308	491	485
	sphinganine	Lipids	Sphingolipid	939	492	17769
	sphingosine	Lipids	Sphingolipid	940	493	17747
	stachydrine	Amino acid	Glutamate family (alpha-ketoglutarate derived)	208	494	34384
	stigmasterol	Lipids	Sterols	963	497	21183
	suberate (octanedioate)	Lipids	Fatty acid, Dicarboxylate	1022	498	15730
	succinate	Carbohydrate	TCA cycle	380	499	1437
	sucrose	Carbohydrate	Sucrose, glucose,fructose metabolism	521	500	1519
	sulfate*	Amino acid	Serine family (phosphoglycerate derived)	24	501	46960
	tartronate (hydroxymalonate)	Carbohydrate	Photorespiration	400	502	20693
	taurine	Amino acid	Serine family (phosphoglycerate derived)	17	503	2125
	thiamin (Vitamin B1)	Cofactors, Prosthetic Groups, Electron Carriers	Thiamine metabolism	1118	504	5341
	threonate	Cofactors, Prosthetic Groups, Electron Carriers	Ascorbate metabolism	1109	507	27738
	threonine	Amino acid	Aspartate family (OAA derived)	144	508	1284
	threonylphenylalanine	Peptide	Dipeptide	1348	509	31530
	thymidine	Nucleotide	Pyrimidine metabolism	1227	510	2183
	thymidine 5'-monophosphate	Nucleotide	Pyrimidine metabolism	1228	511	12023
	trans-4-hydroxyproline	Amino acid	Glutamate family (alpha-ketoglutarate derived)	210	512	32306
	trans-urocanate	Amino acid	Glutamate family (alpha-ketoglutarate derived)	213	513	607
	trigonelline (N'-methylnicotinate)	Cofactors, Prosthetic Groups, Electron Carriers	Nicotinate and nicotinamide metabolism	1074	516	32401
	tryptamine	Amino acid	Aromatic amino acid metabolism (PEP derived)	83	518	6104
	tryptophan	Amino acid	Aromatic amino acid metabolism (PEP derived)	69	519	54
	tyramine	Amino acid	Aromatic amino acid metabolism (PEP derived)	85	521	1603
	tyrosine	Amino acid	Aromatic amino acid metabolism (PEP derived)	71	522	1299
	UDP-N-acetylgalactosamine	Carbohydrate	Amino sugar and nucleotide sugar	442	527	18396
	UDP-N-acetylglucosamine	Carbohydrate	Amino sugar and nucleotide sugar	430	528	35162
	uracil	Nucleotide	Pyrimidine metabolism	1230	529	605
	urate	Nucleotide	Purine metabolism	1184	530	1604
	uridine	Nucleotide	Pyrimidine metabolism	1231	531	606
	uridine 2'-monophosphate (2'-UMP)*	Nucleotide	Pyrimidine metabolism	1241	532	52444
	uridine 3'-monophosphate (3'-UMP)	Nucleotide	Pyrimidine metabolism	1239	533	39764
	uridine 5'-monophosphate (UMP)	Nucleotide	Pyrimidine metabolism	1233	534	2856
	uridine-2',3'-cyclic monophosphate	Nucleotide	Pyrimidine metabolism	1234	535	37137
	valine	Amino acid	Branched Chain Amino Acids (pyruvate derived)	286	536	1649
	valylglutamine	Peptide	Dipeptide	1408	537	42079
	valylglycine	Peptide	Dipeptide	1249	538	40475
	valylleucine	Peptide	Dipeptide	1366	539	39994
	vanillate	Secondary metabolism	Phenylpropanoids	1812	540	35639
	xanthine	Nucleotide	Purine metabolism	1185	541	3147
	xanthosine	Nucleotide	Purine metabolism	1186	542	15136
	xylose	Carbohydrate	Amino sugar and nucleotide sugar	433	544	15581

## Sheet: Maize Statistical Heat Map
	Heat map of statistically significant biochemicals profiled in this study. Yellow and blue shaded cells indicate p≤0.05 (yellow indicates that the mean values are significantly higher for that comparison; blue values significantly lower). Light yellow and light blue shaded cells indicate 0.05<p<0.10 (light yellow indicates that the mean values trend higher for that comparison; light blue values t…							Ratios of Group Means in Scaled Imputed Data							Statistical Values (From log transfomred Scaled Imputed Data)													Mean Values (Scaled Imputed Data)									% Detected by Group in Raw Data									Chemical Properties
								WATER STRESS EFFECTS							WS1/WWD1		WS1/WWT1		WS2/WWD2		WS2/WWT2		WS2/WWD3		WS2/WWT3
	Pathway Order	Alpha	Comp ID	Super Pathway	Sub Pathway	Biochemical Name	X	WS1/WWD1	WS1/WWT1	WS2/WWD2	WS2/WWT2	WS2/WWD3	WS2/WWT3	X	p-value	q-value	p-value	q-value	p-value	q-value	p-value	q-value	p-value	q-value	p-value	q-value	X	WWD1	WWD2	WWD3	WWT1	WWT2	WWT3	WS1	WS2	X	WWD1	WWD2	WWD3	WWT1	WWT2	WWT3	WS1	WS2	X	Biochemical Name	Super Pathway	Sub Pathway	Chemical ID
	261	90	1419	Amino acid	Amines and polyamines	5-methylthioadenosine (MTA)		0.74	1.05	1.05	1.34	1.12	1.67		0.0213	0.0182	0.6838	0.1034	0.6767	0.1254	0.0366	0.0177	0.3433	0.0772	0.0039	0.0017		1.2782	1.1284	1.0606	0.8987	0.8852	0.7106	0.9418	1.1862		100	100	100	100	100	100	100	100		5-methylthioadenosine (MTA)	Amino acid	Amines and polyamines	212
	262	105	15496	Amino acid	Amines and polyamines	agmatine		0.52	0.73	0.4	0.91	0.32	0.42		0.0237	0.0196	0.36	0.0615	0.0059	0.0026	0.5744	0.1611	0.0024	0.0016	0.0075	0.0027		2.1443	1.0431	1.3004	1.5094	0.4641	0.9951	1.1093	0.4214		100	100	100	100	100	100	100	25		agmatine	Amino acid	Amines and polyamines	100000103
	269	296	37496	Amino acid	Amines and polyamines	N-acetylputrescine		0.55	0.88	0.39	0.84	0.43	0.84		0.0015	0.0024	0.0401	0.01	0.0005	0.0005	0.1353	0.0509	0.0009	0.0008	0.1472	0.029		1.3582	2.0797	1.9302	0.8425	0.9772	0.9746	0.7405	0.8211		100	100	100	100	100	100	100	100		N-acetylputrescine	Amino acid	Amines and polyamines	192
	270	306	43026	Amino acid	Amines and polyamines	nicotianamine		0.74	0.37	0.46	0.25	0.65	0.46		0.0064	0.0073	8.0523e-07	8.7508e-06	0.001	0.0008	2.4358e-05	9.8267e-05	0.0373	0.0132	0.001	0.0006		1.1907	1.0081	0.7156	2.4132	1.8608	1.0205	0.8844	0.466		100	100	100	100	100	100	100	100		nicotianamine	Amino acid	Amines and polyamines	100004035
	263	349	1408	Amino acid	Amines and polyamines	putrescine		1.12	1.25	0.81	0.54	0.42	0.32		0.4513	0.1967	0.1609	0.0312	0.1312	0.0323	0.0038	0.0031	0.0018	0.0012	0.0015	0.0009		0.1972	1.0575	2.0286	0.1769	1.5816	2.6955	0.2215	0.8585		100	100	100	100	100	100	100	100		putrescine	Amino acid	Amines and polyamines	49
	264	380	485	Amino acid	Amines and polyamines	spermidine		2.05	8.32	0.57	1.38	1.13	1.39		0.445	0.1948	0.0202	0.006	0.115	0.0288	0.4626	0.1351	0.7567	0.139	0.451	0.0715		2.8898	0.9459	0.4766	0.7114	0.3909	0.3873	5.9189	0.5402		100	100	50	50	50	25	100	50		spermidine	Amino acid	Amines and polyamines	50
	31	60	32197	Amino acid	Aromatic amino acid metabolism (PEP derived)	3-(4-hydroxyphenyl)lactate		0.72	0.51	0.68	0.33	0.57	0.31		0.169	0.0922	0.0035	0.0018	0.033	0.0107	0.0011	0.0012	0.0118	0.0053	0.0015	0.0008		0.6988	0.9512	1.1331	0.9926	1.9556	2.0993	0.5055	0.6445		100	100	100	100	100	100	100	100		3-(4-hydroxyphenyl)lactate	Amino acid	Aromatic amino acid metabolism (PEP derived)	240
	36	71	12017	Amino acid	Aromatic amino acid metabolism (PEP derived)	3-methoxytyrosine		1.06	1.39	1.18	1.6	1.05	1.38		0.8083	0.3221	0.1132	0.023	0.2065	0.0468	0.027	0.0138	0.7092	0.1335	0.0401	0.0105		0.8639	1.1549	1.2926	0.6569	0.8508	0.9883	0.915	1.3607		100	100	100	100	100	100	100	100		3-methoxytyrosine	Amino acid	Aromatic amino acid metabolism (PEP derived)	1342
	38	84	1669	Amino acid	Aromatic amino acid metabolism (PEP derived)	4-hydroxyphenylpyruvate		1	1	0.29	0.21	0.18	0.15						0.0004	0.0004	0.0001	0.0002	7.5723e-05	0.0001	4.419e-05	7.1951e-05		0.1448	0.7699	1.2215	0.1448	1.0373	1.4823	0.1448	0.2224		25	100	100	0	100	100	0	100		4-hydroxyphenylpyruvate	Amino acid	Aromatic amino acid metabolism (PEP derived)	1141
	50	240	1417	Amino acid	Aromatic amino acid metabolism (PEP derived)	kynurenate		0.55	1.01	0.61	1.07	0.66	0.96		0.0024	0.0034	0.9954	0.1417	0.0235	0.008	0.7298	0.1939	0.0347	0.0127	0.6835	0.0994		1.7327	1.5228	1.3971	0.9379	0.8626	0.9594	0.9473	0.924		100	100	100	100	100	100	100	100		kynurenate	Amino acid	Aromatic amino acid metabolism (PEP derived)	98
	51	241	15140	Amino acid	Aromatic amino acid metabolism (PEP derived)	kynurenine		0.57	0.64	2	2.36	0.94	1.39		0.1155	0.0665	0.2588	0.0463	0.2161	0.0486	0.1306	0.05	0.6711	0.128	0.5669	0.0861		0.6796	0.616	1.3135	0.6067	0.5233	0.886	0.3898	1.2344		75	50	100	50	25	75	50	75		kynurenine	Amino acid	Aromatic amino acid metabolism (PEP derived)	100000265
	53	294	33950	Amino acid	Aromatic amino acid metabolism (PEP derived)	N-acetylphenylalanine		0.36	0.25	0.32	0.27	0.4	0.36		0.1009	0.0595	0.0003	0.0003	0.0017	0.001	0.0006	0.0008	0.0033	0.002	0.0015	0.0009		1.0078	1.1128	0.8977	1.4645	1.2994	0.9916	0.3667	0.3569		100	100	100	100	100	100	100	100		N-acetylphenylalanine	Amino acid	Aromatic amino acid metabolism (PEP derived)	100001256
	56	300	32390	Amino acid	Aromatic amino acid metabolism (PEP derived)	N-acetyltyrosine		0.4	0.54	0.6	0.33	0.71	0.35		0.1457	0.0812	0.0634	0.0149	0.0057	0.0025	0.0043	0.0035	0.1008	0.0293	0.0008	0.0006		1.2667	0.8408	0.7081	0.9248	1.5245	1.4158	0.5015	0.5015		100	100	100	75	100	100	0	0		N-acetyltyrosine	Amino acid	Aromatic amino acid metabolism (PEP derived)	100001104
	90	305	48433	Amino acid	Aromatic amino acid metabolism (PEP derived)	N-formylphenylalanine		0.1	0.08	0.08	0.11	0.08	0.17		0.0003	0.0009	3.0256e-05	8.3999e-05	4.0665e-05	9.8182e-05	0.0001	0.0002	0.0004	0.0004	0.0008	0.0006		0.8122	2.1194	1.9834	1.0893	1.4484	0.9384	0.0822	0.1595		100	100	100	100	100	100	100	100		N-formylphenylalanine	Amino acid	Aromatic amino acid metabolism (PEP derived)	100006056
	80	315	42999	Amino acid	Aromatic amino acid metabolism (PEP derived)	N-methylphenylalanine		21.27	31.6	11.72	9.74	5.64	8.44		0.0001	0.0005	6.7861e-05	0.0001	1.1953e-06	1.3689e-05	1.3544e-07	1.4355e-05	2.8793e-05	8.6535e-05	1.4107e-06	8.2688e-06		0.2562	0.7213	1.4983	0.1725	0.8684	1.002	5.4506	8.4554		75	100	100	0	100	100	100	100		N-methylphenylalanine	Amino acid	Aromatic amino acid metabolism (PEP derived)	100004042
	93	324	37451	Amino acid	Aromatic amino acid metabolism (PEP derived)	O-methyl tyrosine		0.65	0.45	0.53	0.63	0.58	0.74		0.0956	0.0575	0.0191	0.0059	0.0088	0.0034	0.0252	0.0132	0.0123	0.0055	0.078	0.0176		0.6614	1.4154	1.3025	0.9637	1.206	1.0189	0.4327	0.7541		100	100	100	100	100	100	100	100		O-methyl tyrosine	Amino acid	Aromatic amino acid metabolism (PEP derived)	100002078
	82	328	45413	Amino acid	Aromatic amino acid metabolism (PEP derived)	O-sulfo-L-tyrosine		0.85	1.06	0.95	1.16	1.4	1.68		0.2309	0.119	0.7169	0.1079	0.5048	0.1002	0.1815	0.065	0.0129	0.0057	0.0016	0.0009		1.4006	1.0588	0.7146	1.1202	0.8646	0.5949	1.1895	1.0023		100	100	100	100	100	100	100	100		O-sulfo-L-tyrosine	Amino acid	Aromatic amino acid metabolism (PEP derived)	100005384
	88	329	43392	Amino acid	Aromatic amino acid metabolism (PEP derived)	o-Tyrosine		0.93	1.04	0.84	0.68	0.93	1.03		0.6943	0.2868	0.8945	0.1292	0.305	0.0654	0.3268	0.102	0.9471	0.1674	0.766	0.1085		1.0665	0.9763	0.8803	0.9543	1.2078	0.799	0.9925	0.8228		100	75	50	75	75	75	100	75		o-Tyrosine	Amino acid	Aromatic amino acid metabolism (PEP derived)	100004290
	59	333	12142	Amino acid	Aromatic amino acid metabolism (PEP derived)	phenethylamine		0.98	1.2	0.82	0.9	0.67	0.97		0.7254	0.2966	0.6466	0.098	0.2896	0.0628	0.5022	0.144	0.0933	0.0278	0.7184	0.104		0.726	1.215	1.4843	0.5952	1.1123	1.025	0.7137	0.9957		100	100	100	100	100	100	75	100		phenethylamine	Amino acid	Aromatic amino acid metabolism (PEP derived)	1207
	62	334	64	Amino acid	Aromatic amino acid metabolism (PEP derived)	phenylalanine		1	0.84	0.86	0.69	0.51	0.55		0.9836	0.3679	0.1492	0.0294	0.085	0.0227	0.007	0.0047	0.0001	0.0002	0.0007	0.0005		0.332	1.0625	1.7826	0.3928	1.3333	1.6781	0.3311	0.9153		100	100	100	100	100	100	100	100		phenylalanine	Amino acid	Aromatic amino acid metabolism (PEP derived)	460
	63	337	22130	Amino acid	Aromatic amino acid metabolism (PEP derived)	phenyllactate (PLA)		0.31	0.15	0.17	0.11	0.44	0.61		9.2451e-05	0.0005	1.7682e-06	1.4939e-05	0.0001	0.0002	0.0002	0.0003	0.1216	0.0335	0.7229	0.1044		1.225	0.9723	0.3776	2.5272	1.4538	0.2728	0.3781	0.1651		100	100	75	100	100	25	100	75		phenyllactate (PLA)	Amino acid	Aromatic amino acid metabolism (PEP derived)	100000774
	64	338	566	Amino acid	Aromatic amino acid metabolism (PEP derived)	phenylpyruvate		0.47	0.31	0.18	0.16	0.29	0.28		0.0011	0.0021	5.1756e-05	0.0001	0.0003	0.0003	6.0466e-05	0.0002	0.0003	0.0003	0.0002	0.0002		1.015	1.4217	0.8847	1.5447	1.5667	0.9159	0.4723	0.2532		100	100	100	100	100	100	100	100		phenylpyruvate	Amino acid	Aromatic amino acid metabolism (PEP derived)	241
	66	355	18335	Amino acid	Aromatic amino acid metabolism (PEP derived)	quinate		1.53	0.95	2.54	1.49	2.74	1.87		0.0012	0.0022	0.4057	0.0672	6.1815e-06	3.0317e-05	0.0002	0.0003	1.1187e-06	1.4009e-05	8.3094e-06	2.8819e-05		0.8183	0.6576	0.609	1.32	1.123	0.8949	1.2537	1.6715		100	100	100	100	100	100	100	100		quinate	Amino acid	Aromatic amino acid metabolism (PEP derived)	100000442
	67	373	2342	Amino acid	Aromatic amino acid metabolism (PEP derived)	serotonin		1	1	1	1	1	1															1	1	1	1	1	1	1	1		0	0	0	0	0	0	25	0		serotonin	Amino acid	Aromatic amino acid metabolism (PEP derived)	504
	68	374	15144	Amino acid	Aromatic amino acid metabolism (PEP derived)	shikimate		2.45	1.45	5.82	3.42	5.89	4.43		0.0001	0.0005	0.0138	0.0047	1.1493e-07	4.3011e-06	9.9026e-07	2.624e-05	9.9432e-08	2.4903e-06	8.9065e-06	2.8819e-05		0.967	0.6189	0.6124	1.632	1.0554	0.8138	2.37	3.6045		100	100	100	100	100	100	100	100		shikimate	Amino acid	Aromatic amino acid metabolism (PEP derived)	100000293
	83	407	6104	Amino acid	Aromatic amino acid metabolism (PEP derived)	tryptamine		2.17	1.77	2.86	2.86	0.85	2.86		0.0018	0.0028	0.0071	0.0028	0.391	0.0802	0.391	0.1167	0.7253	0.1352	0.391	0.064		0.4877	0.4877	1.6482	0.5989	0.4877	0.4877	1.0576	1.3929		0	0	50	75	0	0	100	25		tryptamine	Amino acid	Aromatic amino acid metabolism (PEP derived)	1095
	69	408	54	Amino acid	Aromatic amino acid metabolism (PEP derived)	tryptophan		1.45	1.64	1.64	1.46	0.8	0.92		0.0557	0.0367	0.0156	0.0052	0.006	0.0026	0.0157	0.0091	0.0355	0.0128	0.2683	0.0468		0.5861	0.9697	1.9899	0.5185	1.085	1.7314	0.8503	1.5878		100	100	100	100	100	100	100	100		tryptophan	Amino acid	Aromatic amino acid metabolism (PEP derived)	565
	85	409	1603	Amino acid	Aromatic amino acid metabolism (PEP derived)	tyramine		3.83	9.94	3.2	11.6	2.51	4.87		0.0087	0.0094	0.0005	0.0005	0.113	0.0284	0.0048	0.0036	0.087	0.0263	0.0046	0.0019		0.4259	2.492	3.1723	0.1641	0.6867	1.6369	1.6316	7.9664		100	100	100	100	100	100	100	100		tyramine	Amino acid	Aromatic amino acid metabolism (PEP derived)	1133
	71	410	1299	Amino acid	Aromatic amino acid metabolism (PEP derived)	tyrosine		0.93	0.9	0.69	0.55	0.37	0.39		0.6251	0.2637	0.4967	0.0786	0.011	0.0041	0.0012	0.0014	8.9705e-06	4.3291e-05	4.1985e-06	2.2101e-05		0.2938	1.2368	2.3311	0.3062	1.5424	2.2149	0.2747	0.8541		100	100	100	100	100	100	100	100		tyrosine	Amino acid	Aromatic amino acid metabolism (PEP derived)	815
	98	31	6146	Amino acid	Aspartate family (OAA derived)	2-aminoadipate		0.09	0.12	0.17	0.28	0.22	0.43		0.0008	0.0018	0.0011	0.0007	0.0084	0.0033	0.0205	0.0111	0.0133	0.0058	0.0501	0.0124		1.6877	1.3313	1.0142	1.1899	0.7828	0.5163	0.1482	0.2217		100	100	100	100	100	100	50	50		2-aminoadipate	Amino acid	Aspartate family (OAA derived)	381
	139	45	31934	Amino acid	Aspartate family (OAA derived)	2-hydroxyadipate		0.49	0.9	0.54	0.89	0.98	0.87		0.0363	0.0269	0.538	0.0835	0.0933	0.0241	0.6175	0.1708	0.6497	0.1252	0.7331	0.1053		2.0984	1.5558	0.8662	1.1505	0.9453	0.97	1.0383	0.8454		100	100	100	100	100	100	100	100		2-hydroxyadipate	Amino acid	Aspartate family (OAA derived)	100001153
	136	58	43400	Amino acid	Aspartate family (OAA derived)	2-piperidinone		1.24	1.13	1.19	1.26	1.2	1.23		0.0463	0.0327	0.0787	0.0175	0.0435	0.0135	0.0199	0.0109	0.0814	0.0248	0.0482	0.012		0.8917	0.974	0.9704	0.9809	0.922	0.9458	1.1054	1.1597		100	100	100	100	100	100	100	100		2-piperidinone	Amino acid	Aspartate family (OAA derived)	100004295
	135	93	43231	Amino acid	Aspartate family (OAA derived)	6-oxopiperidine-2-carboxylic acid		2.03	2.19	2.41	3.03	2.09	3.1		0.0379	0.0279	0.0247	0.0068	0.0004	0.0004	0.0001	0.0002	0.0026	0.0017	8.4374e-05	0.0001		0.7615	1.0934	1.2629	0.7059	0.871	0.8511	1.5445	2.6367		100	100	100	100	100	100	100	100		6-oxopiperidine-2-carboxylic acid	Amino acid	Aspartate family (OAA derived)	100004499
	101	106	1126	Amino acid	Aspartate family (OAA derived)	alanine		1.17	1.16	1.5	1.25	0.83	0.81		0.3171	0.1534	0.3483	0.06	0.0037	0.0019	0.0113	0.0071	0.0141	0.0061	0.0091	0.0032		0.4745	0.884	1.5933	0.4809	1.0635	1.6296	0.5567	1.328		100	100	100	100	100	100	100	100		alanine	Amino acid	Aspartate family (OAA derived)	811
	102	111	15142	Amino acid	Aspartate family (OAA derived)	allo-threonine		1.7	1.95	1.16	1.56	1.03	1.44		0.0038	0.0053	0.0029	0.0015	0.0797	0.0216	0.0006	0.0008	0.7391	0.1371	0.0017	0.0009		0.4902	1.2365	1.3894	0.4262	0.9132	0.9958	0.8323	1.4291		100	100	100	100	100	100	100	100		allo-threonine	Amino acid	Aspartate family (OAA derived)	100000272
	103	122	512	Amino acid	Aspartate family (OAA derived)	asparagine		3.43	4.3	2.32	2.49	1.66	1.88		1.8066e-05	0.0002	6.0801e-06	3.2161e-05	6.6382e-06	3.0317e-05	1.2148e-05	7.9736e-05	1.4184e-05	5.3286e-05	1.1599e-05	3.0905e-05		0.3407	0.9521	1.3275	0.2711	0.8861	1.1724	1.1669	2.2044		100	100	100	100	100	100	100	100		asparagine	Amino acid	Aspartate family (OAA derived)	917
	104	123	443	Amino acid	Aspartate family (OAA derived)	aspartate		0.7	0.77	0.76	1.01	0.97	1.39		0.0324	0.0244	0.084	0.0183	0.0039	0.002	0.8339	0.2135	0.5176	0.1045	0.0016	0.0009		1.5818	1.2019	0.944	1.4303	0.9011	0.6562	1.0997	0.9134		100	100	100	100	100	100	100	100		aspartate	Amino acid	Aspartate family (OAA derived)	234
	107	223	23642	Amino acid	Aspartate family (OAA derived)	homoserine		0.76	1.48	0.57	0.88	0.56	0.69		0.0059	0.007	0.0004	0.0004	0.0004	0.0004	0.0247	0.0131	4.2833e-05	0.0001	0.0002	0.0002		1.1551	1.4541	1.4736	0.5982	0.9363	1.198	0.8826	0.8261		100	100	100	100	100	100	100	100		homoserine	Amino acid	Aspartate family (OAA derived)	100000458
	108	224	34458	Amino acid	Aspartate family (OAA derived)	homoserine lactone		0.71	0.64	0.71	0.68	0.4	0.41		0.2976	0.1479	0.0646	0.015	0.0423	0.0133	0.0142	0.0084	0.0011	0.0009	0.0005	0.0004		0.2675	1.2489	2.1937	0.2992	1.2947	2.1483	0.19	0.886		100	100	100	100	100	100	100	100		homoserine lactone	Amino acid	Aspartate family (OAA derived)	100000262
	110	251	1301	Amino acid	Aspartate family (OAA derived)	lysine		1.24	1.4	1.83	2.33	0.75	1.51		0.194	0.103	0.062	0.0147	0.0001	0.0002	7.7005e-05	0.0002	0.006	0.0032	0.0012	0.0007		0.739	1.0638	2.5877	0.652	0.8327	1.2837	0.9137	1.9424		100	100	100	100	100	100	100	100		lysine	Amino acid	Aspartate family (OAA derived)	407
	111	262	1302	Amino acid	Aspartate family (OAA derived)	methionine		0.62	0.92	0.35	0.38	0.22	0.29		0.0131	0.013	0.5169	0.0806	5.796e-05	0.0001	0.0001	0.0002	1.5741e-06	1.6896e-05	3.7758e-07	4.4264e-06		0.6764	1.5897	2.509	0.4579	1.468	1.9154	0.4191	0.5516		100	100	100	100	100	100	100	100		methionine	Amino acid	Aspartate family (OAA derived)	415
	146	263	44878	Amino acid	Aspartate family (OAA derived)	methionine sulfone		0.63	2.89	0.83	3.53	0.89	3.31		0.022	0.0186	0.0006	0.0005	0.0373	0.012	3.0666e-05	0.0001	0.0189	0.0076	0.0002	0.0002		1.3686	1.2591	1.1662	0.2994	0.2946	0.3146	0.8665	1.0406		100	100	100	100	100	100	100	100		methionine sulfone	Amino acid	Methionine, cysteine, SAM, taurine	100004635
	112	264	18374	Amino acid	Aspartate family (OAA derived)	methionine sulfoxide		0.31	0.29	0.29	0.27	0.21	0.24		0.0014	0.0023	0.0007	0.0005	0.0004	0.0004	0.0011	0.0012	0.0004	0.0004	0.001	0.0007		0.6471	1.1923	1.6793	0.6796	1.2804	1.4765	0.2	0.3501		100	100	100	100	100	100	100	100		methionine sulfoxide	Amino acid	Aspartate family (OAA derived)	100000039
	114	275	36752	Amino acid	Aspartate family (OAA derived)	N6-acetyllysine		0.33	0.35	0.39	0.48	0.47	0.74		7.875e-05	0.0005	0.0001	0.0002	3.4438e-06	2.003e-05	0.0008	0.001	1.0921e-06	1.4009e-05	0.0034	0.0015		2.0359	1.2095	0.9975	1.9053	0.9677	0.6297	0.6755	0.467		100	100	100	100	100	100	100	100		N6-acetyllysine	Amino acid	Aspartate family (OAA derived)	100001734
	141	277	37458	Amino acid	Aspartate family (OAA derived)	N6-carboxyethyllysine		1.26	2.01	1.08	2.27	2.58	5.48		0.0256	0.0205	0.0011	0.0007	0.6444	0.1215	0.0034	0.0029	0.0328	0.012	7.1305e-05	9.72e-05		2.2693	0.9326	0.3922	1.4237	0.4455	0.1844	2.865	1.0109		100	100	100	100	100	50	100	100		N6-carboxyethyllysine	Amino acid	Aspartate family (OAA derived)	100001769
	144	278	36713	Amino acid	Aspartate family (OAA derived)	N6-carboxymethyllysine		1.56	1.93	1.02	1.29	1.29	1.55		0.0142	0.0137	0.0251	0.0069	0.9941	0.1722	0.3092	0.0972	0.3303	0.0752	0.1062	0.0225		1.8614	0.6943	0.5485	1.5003	0.5464	0.4544	2.9023	0.7061		100	100	25	100	75	0	100	100		N6-carboxymethyllysine	Amino acid	Aspartate family (OAA derived)	100001768
	115	281	1498	Amino acid	Aspartate family (OAA derived)	N-6-trimethyllysine		0.66	0.73	0.66	0.83	0.77	1.01		0.0003	0.0009	0.0002	0.0003	0.0003	0.0003	0.0026	0.0023	0.0004	0.0004	0.7328	0.1053		1.3243	1.1956	1.0354	1.1935	0.9552	0.7822	0.8763	0.7929		100	100	100	100	100	100	100	100		N-6-trimethyllysine	Amino acid	Aspartate family (OAA derived)	189
	116	282	1585	Amino acid	Aspartate family (OAA derived)	N-acetylalanine		1.08	1.04	0.92	0.79	0.98	0.95		0.6868	0.2844	0.8606	0.1255	0.3734	0.0785	0.0465	0.0216	0.797	0.1453	0.5187	0.0807		1.4461	0.8916	0.8377	1.5033	1.038	0.8655	1.566	0.8186		100	100	100	100	100	100	100	100		N-acetylalanine	Amino acid	Aspartate family (OAA derived)	1110
	117	284	33942	Amino acid	Aspartate family (OAA derived)	N-acetylasparagine		0.08	0.14	0.11	0.21	0.15	0.32		7.3924e-05	0.0005	3.5866e-05	9.0863e-05	3.4693e-06	2.003e-05	1.4741e-05	7.9736e-05	4.6911e-05	0.0001	0.0004	0.0003		2.1665	1.6119	1.1825	1.2807	0.8529	0.5658	0.1729	0.1817		100	100	100	100	100	100	100	100		N-acetylasparagine	Amino acid	Aspartate family (OAA derived)	100001257
	118	285	22185	Amino acid	Aspartate family (OAA derived)	N-acetylaspartate (NAA)		0.21	0.2	0.27	0.36	0.35	0.5		0.0003	0.0009	8.7537e-06	3.3265e-05	0.0002	0.0003	0.0004	0.0006	0.0006	0.0006	0.0019	0.001		1.6319	1.357	1.0505	1.7101	1.0173	0.7328	0.3473	0.3682		100	100	100	100	100	100	100	100		N-acetylaspartate (NAA)	Amino acid	Aspartate family (OAA derived)	100000787
	119	286	37432	Amino acid	Aspartate family (OAA derived)	N-acetyl-beta-alanine		0.56	0.73	0.44	0.56	0.66	0.78		0.0187	0.0166	0.0933	0.0199	0.0002	0.0003	0.0014	0.0015	0.0101	0.0047	0.1252	0.0255		1.6841	1.3606	0.9069	1.2857	1.0624	0.762	0.9396	0.5948		100	100	100	100	100	100	100	100		N-acetyl-beta-alanine	Amino acid	Aspartate family (OAA derived)	100002102
	120	293	1589	Amino acid	Aspartate family (OAA derived)	N-acetylmethionine		1.13	1.63	0.9	1.34	1.84	2.84		0.6998	0.2883	0.1064	0.022	0.4459	0.09	0.0869	0.0357	0.0071	0.0036	0.0005	0.0004		2.8489	1.0523	0.5124	1.976	0.7039	0.3319	3.2214	0.9424		100	100	100	100	100	100	100	100		N-acetylmethionine	Amino acid	Aspartate family (OAA derived)	1083
	121	299	33939	Amino acid	Aspartate family (OAA derived)	N-acetylthreonine		1.33	2.81	1.1	1.8	1.26	1.95		0.0013	0.0023	2.2097e-05	7.0713e-05	0.1542	0.0378	0.0001	0.0002	0.0402	0.0141	7.517e-05	0.0001		0.99	1.051	0.9235	0.4682	0.644	0.5951	1.3175	1.1594		100	100	100	100	100	100	100	100		N-acetylthreonine	Amino acid	Aspartate family (OAA derived)	100001274
	122	304	2829	Amino acid	Aspartate family (OAA derived)	N-formylmethionine		0.4	0.59	0.08	0.14	0.1	0.23		0.0224	0.0188	0.0819	0.018	4.6862e-07	1.1692e-05	1.0577e-05	7.4742e-05	7.142e-08	2.4903e-06	1.2748e-05	3.1134e-05		1.3792	1.6281	1.2457	0.9463	0.9152	0.5711	0.5584	0.1301		100	100	100	100	100	100	100	50		N-formylmethionine	Amino acid	Aspartate family (OAA derived)	194
	143	316	47101	Amino acid	Aspartate family (OAA derived)	N-methylpipecolate		1.51	5.37	1.3	3.68	1.53	3.78		0.0027	0.0039	0.0013	0.0008	0.1675	0.0394	0.0034	0.0029	0.0384	0.0135	0.0006	0.0004		1.0487	1.118	0.9469	0.296	0.3943	0.3836	1.5883	1.4517		100	100	100	75	100	100	100	100		N-methylpipecolate	Amino acid	Aspartate family (OAA derived)	100005383
	124	345	1444	Amino acid	Aspartate family (OAA derived)	pipecolate		1.72	5.53	1.96	6.72	1.48	5.92		0.004	0.0056	6.9424e-05	0.0001	0.0041	0.002	0.0001	0.0002	0.035	0.0127	3.613e-05	6.0509e-05		0.8605	1.1435	1.5186	0.2671	0.3338	0.3792	1.4774	2.2447		100	100	100	100	100	100	100	100		pipecolate	Amino acid	Aspartate family (OAA derived)	1025
	127	366	1495	Amino acid	Aspartate family (OAA derived)	saccharopine		18.21	20.8	9.29	12.49	11.68	32.1		0.0001	0.0005	8.677e-06	3.3265e-05	9.4898e-05	0.0002	0.0001	0.0002	1.0032e-05	4.3615e-05	0.0001	0.0001		1.1683	1.0346	0.8231	1.0224	0.7696	0.2994	21.2691	9.6107		100	100	100	100	100	100	100	100		saccharopine	Amino acid	Aspartate family (OAA derived)	392
	128	367	42382	Amino acid	Aspartate family (OAA derived)	S-adenosylhomocysteine (SAH)		0.76	1.11	0.4	0.81	0.77	1.66		0.0542	0.0363	0.4215	0.0695	0.0026	0.0014	0.3049	0.0962	0.2596	0.0609	0.2143	0.0394		1.7782	1.4435	0.7492	1.2115	0.7194	0.3488	1.3476	0.5801		100	100	100	100	100	100	100	100		S-adenosylhomocysteine (SAH)	Amino acid	Aspartate family (OAA derived)	197
	129	368	15915	Amino acid	Aspartate family (OAA derived)	S-adenosylmethionine (SAM)		1.15	1.51	1.43	1.7	1.34	1.95		0.3094	0.1511	0.0275	0.0074	0.0097	0.0037	0.0016	0.0016	0.023	0.0088	0.0005	0.0004		1.0062	1.0836	1.1549	0.7692	0.9078	0.7916	1.1599	1.5452		100	100	100	100	100	100	100	100		S-adenosylmethionine (SAM)	Amino acid	Aspartate family (OAA derived)	1263
	145	378	38127	Amino acid	Aspartate family (OAA derived)	S-methylmethionine		0.82	0.77	0.99	0.94	0.62	0.69		0.0255	0.0205	0.0094	0.0034	0.7618	0.1384	0.0668	0.0288	5.0806e-08	2.4903e-06	8.5762e-06	2.8819e-05		0.33	1.0201	1.615	0.3501	1.0774	1.4629	0.2707	1.0087		100	100	100	100	100	100	100	100		S-methylmethionine	Amino acid	Serine family (phosphoglycerate derived)	100002183
	130	398	1284	Amino acid	Aspartate family (OAA derived)	threonine		1.37	1.68	1.03	1.2	0.82	1.03		0.0137	0.0134	0.0012	0.0008	0.1863	0.0428	0.0014	0.0015	0.0002	0.0002	0.2855	0.0497		0.4922	1.0762	1.3562	0.4026	0.9296	1.0802	0.6756	1.1116		100	100	100	100	100	100	100	100		threonine	Amino acid	Aspartate family (OAA derived)	564
	221	54	37436	Amino acid	BCAA -isoleucine catabolism	2-methylglutarate		1.97	1.42	0.63	0.86	1.75	1.78		0.0063	0.0073	0.0407	0.0101	0.1156	0.0288	0.5248	0.1495	0.1289	0.0351	0.1158	0.0241		0.9544	1.182	0.4242	1.3205	0.8685	0.4191	1.8768	0.744		100	100	75	100	100	75	100	75		2-methylglutarate	Amino acid	BCAA -isoleucine catabolism	100002098
	217	110	46552	Amino acid	Branched Chain Amino Acids (OAA derived)	allo-isoleucine		0.29	0.83	0.28	1	1	1		1.3707e-05	0.0002	0.0611	0.0146	0.0009	0.0007								1.0945	1.1226	0.3179	0.3811	0.3179	0.3179	0.3179	0.3179		100	100	0	100	0	0	0	0		allo-isoleucine	Amino acid	Branched Chain Amino Acids (OAA derived)	100005840
	213	236	1125	Amino acid	Branched Chain Amino Acids (OAA derived)	isoleucine		1.25	1.2	1.01	0.8	0.59	0.6		0.2054	0.1079	0.2746	0.0488	0.7905	0.1422	0.0086	0.0057	0.0003	0.0003	5.3634e-06	2.4183e-05		0.2004	0.9843	1.6948	0.2101	1.2498	1.671	0.2515	0.9974		100	100	100	100	100	100	100	100		isoleucine	Amino acid	Branched Chain Amino Acids (OAA derived)	376
	223	30	38276	Amino acid	Branched Chain Amino Acids (pyruvate derived)	2,3-dihydroxyisovalerate		0.51	0.78	0.22	0.42	0.19	0.29		0.0043	0.0058	0.1067	0.022	0.0005	0.0005	0.0116	0.0073	0.0003	0.0003	0.0023	0.0011		1.4341	1.3221	1.5041	0.9399	0.6962	0.998	0.7378	0.291		100	100	100	100	100	100	100	100		2,3-dihydroxyisovalerate	Amino acid	Branched Chain Amino Acids (pyruvate derived)	100002417
	226	44	36746	Amino acid	Branched Chain Amino Acids (pyruvate derived)	2-hydroxy-3-methylvalerate		1.46	1.13	1	0.77	1.09	0.84		0.0248	0.0201	0.3583	0.0614	0.9621	0.1682	0.1356	0.0509	0.3994	0.0865	0.5955	0.0884		0.9982	0.9492	0.8751	1.2915	1.2297	1.1365	1.4583	0.952		100	100	100	100	100	100	100	100		2-hydroxy-3-methylvalerate	Amino acid	Branched Chain Amino Acids (pyruvate derived)	100001541
	247	51	15667	Amino acid	Branched Chain Amino Acids (pyruvate derived)	2-isopropylmalate		0.51	0.73	0.24	0.5	0.3	0.79		0.0736	0.0453	0.3083	0.0536	5.898e-05	0.0001	0.0185	0.0102	0.0016	0.0011	0.2164	0.0396		2.279	1.553	1.2475	1.5921	0.7617	0.4776	1.1635	0.3788		100	100	100	100	100	100	100	100		2-isopropylmalate	Amino acid	Branched Chain Amino Acids (pyruvate derived)	100000409
	249	65	32397	Amino acid	Branched Chain Amino Acids (pyruvate derived)	3-hydroxy-2-ethylpropionate		1.48	1.61	0.66	0.8	0.89	1.24		0.0285	0.0223	0.0162	0.0053	0.0014	0.0009	0.403	0.1197	0.1798	0.046	0.058	0.0139		0.9577	1.3506	1.0005	0.8829	1.1124	0.7198	1.4202	0.8903		100	100	100	100	100	100	100	100		3-hydroxy-2-ethylpropionate	Amino acid	Branched Chain Amino Acids (pyruvate derived)	100001170
	228	69	1549	Amino acid	Branched Chain Amino Acids (pyruvate derived)	3-hydroxyisobutyrate		0.51	0.6	0.33	0.48	0.46	0.82		0.0047	0.006	0.0124	0.0044	0.0009	0.0008	0.0048	0.0036	0.0015	0.0011	0.3996	0.0651		1.5648	1.4318	1.0293	1.3248	0.9766	0.5717	0.8013	0.4711		100	100	100	100	100	100	100	100		3-hydroxyisobutyrate	Amino acid	Branched Chain Amino Acids (pyruvate derived)	111
	229	72	44526	Amino acid	Branched Chain Amino Acids (pyruvate derived)	3-methyl-2-oxobutyrate		3.31	10.39	1.97	1.99	2.28	1.81		0.012	0.0119	0.002	0.0011	0.0305	0.0099	0.0439	0.0206	0.005	0.0028	0.0041	0.0017		2.5647	0.7004	0.6047	0.8174	0.6945	0.7625	8.4925	1.3801		100	50	75	100	75	100	100	100		3-methyl-2-oxobutyrate	Amino acid	Branched Chain Amino Acids (pyruvate derived)	100000936
	230	73	15676	Amino acid	Branched Chain Amino Acids (pyruvate derived)	3-methyl-2-oxovalerate		0.72	0.86	0.65	1	1.32	1.8		0.0931	0.0562	0.3553	0.061	0.0485	0.0149	0.9266	0.2316	0.195	0.0488	0.0303	0.0085		2.033	1.1905	0.5884	1.7073	0.7742	0.4313	1.4672	0.7745		100	100	100	100	100	100	100	100		3-methyl-2-oxovalerate	Amino acid	Branched Chain Amino Acids (pyruvate derived)	100000036
	257	74	38667	Amino acid	Branched Chain Amino Acids (pyruvate derived)	3-methylglutaconate		0.32	0.07	0.53	0.22	0.57	0.22		0.1854	0.0991	0.0259	0.007	0.1769	0.041	0.1825	0.065	0.2016	0.0502	0.0864	0.0188		0.5857	1.1146	1.0284	2.8771	2.6646	2.626	0.1903	0.5859		100	100	100	100	100	100	25	50		3-methylglutaconate	Amino acid	Branched Chain Amino Acids (pyruvate derived)	100002458
	231	86	22116	Amino acid	Branched Chain Amino Acids (pyruvate derived)	4-methyl-2-oxopentanoate		0.45	0.34	0.4	0.46	0.8	0.85		0.0054	0.0065	0.0013	0.0008	0.0081	0.0032	0.0108	0.0068	0.2037	0.0503	0.3061	0.0528		2.2724	1.1822	0.591	3.0732	1.0201	0.5586	1.0316	0.473		100	100	100	100	100	100	100	100		4-methyl-2-oxopentanoate	Amino acid	Branched Chain Amino Acids (pyruvate derived)	100000551
	234	113	22132	Amino acid	Branched Chain Amino Acids (pyruvate derived)	alpha-hydroxyisocaproate		2.17	1.36	1.64	0.73	1.58	0.42		0.0186	0.0166	0.1798	0.0339	0.0241	0.0081	0.6744	0.1824	0.0419	0.0146	0.3406	0.0577		1.0273	0.6035	0.6248	1.6376	1.3528	2.366	2.2343	0.9892		100	100	100	100	100	100	100	100		alpha-hydroxyisocaproate	Amino acid	Branched Chain Amino Acids (pyruvate derived)	100000706
	235	114	46537	Amino acid	Branched Chain Amino Acids (pyruvate derived)	alpha-hydroxyisovalerate		2.17	2.51	1.17	0.97	1.45	1.42		0.0135	0.0132	0.0073	0.0028	0.1596	0.0386	0.7327	0.1942	0.0088	0.0042	0.1523	0.0299		1.1794	0.8903	0.7132	1.0189	1.0681	0.7327	2.5596	1.0372		100	100	100	100	100	100	100	100		alpha-hydroxyisovalerate	Amino acid	Branched Chain Amino Acids (pyruvate derived)	100001300
	236	126	12129	Amino acid	Branched Chain Amino Acids (pyruvate derived)	beta-hydroxyisovalerate		0.61	0.36	0.38	0.26	0.65	0.53		0.0516	0.0353	0.0038	0.0018	0.0044	0.0021	0.0007	0.0009	0.0562	0.0189	0.0302	0.0085		1.2874	1.0188	0.5923	2.2027	1.4621	0.7327	0.7897	0.3872		100	100	100	100	100	100	100	100		beta-hydroxyisovalerate	Amino acid	Branched Chain Amino Acids (pyruvate derived)	1442
	237	243	60	Amino acid	Branched Chain Amino Acids (pyruvate derived)	leucine		0.88	0.52	0.69	0.44	0.43	0.35		0.5338	0.2314	0.0209	0.0061	0.017	0.006	0.0006	0.0008	4.142e-06	2.223e-05	0.0003	0.0003		0.2821	1.2615	2.0544	0.4753	1.9735	2.4753	0.2473	0.8766		100	100	100	100	100	100	100	100		leucine	Amino acid	Branched Chain Amino Acids (pyruvate derived)	397
	238	247	22177	Amino acid	Branched Chain Amino Acids (pyruvate derived)	levulinate (4-oxovalerate)		0.56	0.51	0.69	0.74	0.68	0.74		0.0117	0.0118	0.0062	0.0025	0.0824	0.0222	0.2396	0.0796	0.0535	0.0181	0.3185	0.0546		1.1503	1.0023	1.0133	1.2655	0.9245	0.9342	0.6474	0.6868		100	100	100	100	100	100	50	50		levulinate (4-oxovalerate)	Amino acid	Branched Chain Amino Acids (pyruvate derived)	100000765
	240	267	15745	Amino acid	Branched Chain Amino Acids (pyruvate derived)	methylsuccinate		1.46	1.48	0.87	0.87	1.29	1.32		0.0097	0.0101	0.0061	0.0025	0.11	0.0278	0.177	0.0636	0.0298	0.0111	0.0398	0.0104		1.2926	1.0035	0.6757	1.2805	0.9952	0.6587	1.8899	0.8692		100	100	100	100	100	100	100	100		methylsuccinate	Amino acid	Branched Chain Amino Acids (pyruvate derived)	2051
	241	291	33967	Amino acid	Branched Chain Amino Acids (pyruvate derived)	N-acetylisoleucine		0.68	0.6	0.6	0.63	0.69	0.88		0.2968	0.1479	0.032	0.0083	0.05	0.0152	0.0682	0.0293	0.1063	0.0304	0.4243	0.068		1.1109	1.1943	1.0332	1.266	1.1259	0.8146	0.7552	0.7137		100	100	100	100	100	100	100	100		N-acetylisoleucine	Amino acid	Branched Chain Amino Acids (pyruvate derived)	100001276
	242	292	1587	Amino acid	Branched Chain Amino Acids (pyruvate derived)	N-acetylleucine		0.38	0.2	0.41	0.3	0.41	0.48		0.2562	0.1307	0.0009	0.0007	0.0195	0.0068	0.0061	0.0042	0.0224	0.0086	0.0364	0.0098		0.9449	1.0901	1.0925	1.8525	1.5088	0.9302	0.3634	0.4484		100	100	100	100	100	100	100	75		N-acetylleucine	Amino acid	Branched Chain Amino Acids (pyruvate derived)	1082
	243	301	1591	Amino acid	Branched Chain Amino Acids (pyruvate derived)	N-acetylvaline		0.96	0.98	0.6	0.78	0.9	1.3		0.9721	0.3653	0.9094	0.1307	0.0016	0.001	0.0258	0.0134	0.479	0.0983	0.1368	0.0272		1.3859	1.2034	0.8076	1.3444	0.9285	0.5572	1.324	0.7253		100	100	100	100	100	100	100	100		N-acetylvaline	Amino acid	Branched Chain Amino Acids (pyruvate derived)	1084
	244	314	35666	Amino acid	Branched Chain Amino Acids (pyruvate derived)	N-methylleucine		7.94	5.95	5.2	4.03	3.27	3.52		6.1071e-06	0.0001	1.3488e-05	4.8243e-05	4.5462e-09	3.4026e-07	0.0005	0.0007	0.0002	0.0002	0.001	0.0007		0.3649	0.741	1.179	0.4864	0.9554	1.0949	2.8957	3.8548		100	100	100	100	100	100	100	100		N-methylleucine	Amino acid	Branched Chain Amino Acids (pyruvate derived)	100001581
	225	320	37426	Amino acid	Branched Chain Amino Acids (pyruvate derived)	norvaline		0.45	0.54	0.41	0.52	0.54	0.59		0.0206	0.0178	0.0435	0.0107	0.001	0.0008	0.016	0.0092	0.0017	0.0012	0.0971	0.0208		1.1127	1.389	1.0552	0.9154	1.0846	0.9679	0.4973	0.567		100	100	100	100	100	100	100	100		norvaline	Amino acid	Branched Chain Amino Acids (pyruvate derived)	100002082
	246	423	1649	Amino acid	Branched Chain Amino Acids (pyruvate derived)	valine		1.09	1.41	1.02	1.05	0.61	0.76		0.4367	0.193	0.0331	0.0085	0.6507	0.122	0.455	0.1335	0.0001	0.0002	0.0017	0.0009		0.3153	1.0388	1.7312	0.2439	1.0161	1.4064	0.3443	1.0622		100	100	100	100	100	100	100	100		valine	Amino acid	Branched Chain Amino Acids (pyruvate derived)	566
	147	1	1654	Amino acid	Glutamate family (alpha-ketoglutarate derived)	1,3-diaminopropane		0.47	0.58	0.3	0.39	0.43	0.55		0.0011	0.0021	0.0037	0.0018	0.0008	0.0007	0.0038	0.0031	0.0048	0.0027	0.0149	0.0048		1.2429	1.4305	1.0202	1.0005	1.1068	0.7971	0.5804	0.4347		100	100	100	100	100	100	100	100		1,3-diaminopropane	Amino acid	Glutamate family (alpha-ketoglutarate derived)	48
	194	10	30460	Amino acid	Glutamate family (alpha-ketoglutarate derived)	1-methylhistidine		0.48	1.95	0.48	2.13	0.6	2.19		0.0013	0.0023	0.0039	0.0019	0.0017	0.001	0.0046	0.0036	0.0102	0.0047	0.0054	0.0021		1.8037	1.5403	1.2156	0.4406	0.3436	0.3351	0.8607	0.7327		100	100	100	75	50	0	100	100		1-methylhistidine	Amino acid	Glutamate family (alpha-ketoglutarate derived)	100001051
	149	32	1577	Amino acid	Glutamate family (alpha-ketoglutarate derived)	2-aminobutyrate		1.26	1.45	1.19	1.59	0.9	1.34		0.2025	0.1068	0.0466	0.0114	0.167	0.0394	0.0054	0.0039	0.2722	0.0637	0.0456	0.0117		0.5035	1.225	1.621	0.4401	0.9143	1.0858	0.6361	1.4517		100	100	100	100	100	100	100	100		2-aminobutyrate	Amino acid	Glutamate family (alpha-ketoglutarate derived)	1128
	150	59	31675	Amino acid	Glutamate family (alpha-ketoglutarate derived)	2-pyrrolidinone		0.85	1.15	3.42	6.04	8.23	8.78		0.7618	0.3083	0.4955	0.0786	0.0161	0.0058	8.6971e-05	0.0002	0.0001	0.0002	0.0003	0.0003		2.4261	0.274	0.114	1.7839	0.1552	0.1068	2.0581	0.9378		100	100	50	100	75	0	100	100		2-pyrrolidinone	Amino acid	Glutamate family (alpha-ketoglutarate derived)	100001081
	197	62	42564	Amino acid	Glutamate family (alpha-ketoglutarate derived)	3-aminobutyrate		1	1.44	0.73	1.25	0.59	1.08		0.9424	0.3584	0.0011	0.0007	0.0051	0.0023	0.0998	0.0399	0.0006	0.0005	0.4121	0.0666		0.711	1.5785	1.95	0.4961	0.9252	1.0689	0.7123	1.1533		100	100	100	100	100	100	100	100		3-aminobutyrate	Amino acid	Glutamate family (alpha-ketoglutarate derived)	100004085
	151	75	15677	Amino acid	Glutamate family (alpha-ketoglutarate derived)	3-methylhistidine		0.4	1.17	0.57	1.32	0.58	1.33		0.0004	0.001	0.2206	0.04	0.0014	0.0009	0.031	0.0156	0.0002	0.0003	0.0107	0.0036		1.5688	1.9511	1.9221	0.5371	0.8419	0.8381	0.6289	1.1118		100	100	100	100	100	100	100	100		3-methylhistidine	Amino acid	Glutamate family (alpha-ketoglutarate derived)	100000042
	152	77	1558	Amino acid	Glutamate family (alpha-ketoglutarate derived)	4-acetamidobutanoate		0.49	0.66	0.56	0.66	0.78	0.89		0.053	0.0358	0.0638	0.0149	0.0288	0.0095	0.0642	0.0278	0.1929	0.0485	0.4466	0.0711		1.9814	1.1599	0.8411	1.4511	0.9979	0.7321	0.964	0.6539		100	100	100	100	100	100	100	100		4-acetamidobutanoate	Amino acid	Glutamate family (alpha-ketoglutarate derived)	1113
	203	78	15681	Amino acid	Glutamate family (alpha-ketoglutarate derived)	4-guanidinobutanoate		0.59	0.9	0.88	1.33	1.05	1.49		0.0033	0.0046	0.2993	0.0521	0.4348	0.088	0.1089	0.0428	0.4346	0.0925	0.0397	0.0104		1.9607	1.1134	0.9326	1.2847	0.7405	0.6604	1.1557	0.9827		100	100	100	100	100	100	100	100		4-guanidinobutanoate	Amino acid	Glutamate family (alpha-ketoglutarate derived)	100000096
	189	80	40062	Amino acid	Glutamate family (alpha-ketoglutarate derived)	4-hydroxy-2-oxoglutaric acid		0.16	0.18	0.25	0.28	0.76	0.45		0.0003	0.001	0.0007	0.0005	1.2586e-06	1.3689e-05	0.0029	0.0026	0.0189	0.0076	0.003	0.0014		5.4129	1.3706	0.4413	4.8069	1.1904	0.7518	0.8737	0.3374		100	100	100	100	100	100	100	75		4-hydroxy-2-oxoglutaric acid	Amino acid	Glutamate family (alpha-ketoglutarate derived)	100002537
	205	85	32349	Amino acid	Glutamate family (alpha-ketoglutarate derived)	4-imidazoleacetate		0.51	0.67	0.28	0.54	0.25	0.5		0.064	0.0412	0.1967	0.0367	0.0024	0.0014	0.1864	0.0659	0.0004	0.0004	0.1644	0.0318		0.6818	1.2243	1.3721	0.5172	0.6438	0.6857	0.345	0.345		75	100	100	75	50	75	0	0		4-imidazoleacetate	Amino acid	Glutamate family (alpha-ketoglutarate derived)	100001207
	157	121	1638	Amino acid	Glutamate family (alpha-ketoglutarate derived)	arginine		1.38	1.55	1.74	1.79	0.7	1.15		0.0205	0.0178	0.0087	0.0032	0.0004	0.0004	0.0011	0.0012	0.0001	0.0002	0.0818	0.0183		0.6111	1.0388	2.5704	0.543	1.0092	1.5745	0.842	1.8095		100	100	100	100	100	100	100	100		arginine	Amino acid	Glutamate family (alpha-ketoglutarate derived)	231
	159	132	40007	Amino acid	Glutamate family (alpha-ketoglutarate derived)	carboxyethyl-GABA		0.33	0.48	0.4	0.6	0.68	1.15		1.8807e-05	0.0002	0.0011	0.0007	0.0016	0.001	0.0183	0.0102	0.0494	0.0169	0.4352	0.0695		3.1781	1.4485	0.8494	2.2009	0.9591	0.5018	1.0468	0.5781		100	100	100	100	100	100	100	100		carboxyethyl-GABA	Amino acid	Glutamate family (alpha-ketoglutarate derived)	100003260
	193	136	40410	Amino acid	Glutamate family (alpha-ketoglutarate derived)	cis-urocanate		0.88	0.61	1.19	0.86	1.29	1		0.7997	0.3195	0.504	0.0792	0.7969	0.143	0.7737	0.2015	0.7523	0.1385	0.952	0.1313		1.3656	1.027	0.9476	1.9725	1.4173	1.2225	1.2024	1.2179		100	100	100	100	100	100	100	100		cis-urocanate	Amino acid	Glutamate family (alpha-ketoglutarate derived)	100003425
	160	139	2132	Amino acid	Glutamate family (alpha-ketoglutarate derived)	citrulline		0.95	0.8	1.41	0.57	2.31	0.78		0.8901	0.3469	0.2799	0.0493	0.1628	0.0389	0.0223	0.0119	0.0057	0.0031	0.2136	0.0394		1.484	0.4678	0.286	1.7614	1.1484	0.8501	1.4128	0.6599		100	100	100	100	100	100	100	100		citrulline	Amino acid	Glutamate family (alpha-ketoglutarate derived)	391
	162	152	36808	Amino acid	Glutamate family (alpha-ketoglutarate derived)	dimethylarginine (SDMA + ADMA)		0.55	0.49	0.54	0.51	0.5	0.66		0.0181	0.0164	0.0091	0.0033	0.018	0.0064	0.0164	0.0093	0.0146	0.0062	0.0596	0.0142		1.1757	1.0015	1.0902	1.3197	1.0568	0.8199	0.6451	0.5416		100	100	100	100	100	100	100	100		dimethylarginine (SDMA + ADMA)	Amino acid	Glutamate family (alpha-ketoglutarate derived)	100001810
	163	157	37459	Amino acid	Glutamate family (alpha-ketoglutarate derived)	ergothioneine		0.97	2.03	0.68	1	1.15	1.97		0.8873	0.3466	0.005	0.0022	0.0109	0.0041	0.9294	0.2318	0.22	0.0537	0.0025	0.0012		1.9686	1.4481	0.8549	0.9343	0.9874	0.4992	1.8997	0.9845		100	100	100	100	100	100	100	100		ergothioneine	Amino acid	Glutamate family (alpha-ketoglutarate derived)	100002154
	164	174	1416	Amino acid	Glutamate family (alpha-ketoglutarate derived)	gamma-aminobutyrate (GABA)		2.05	3.52	3.24	4.43	3.67	4.52		0.0143	0.0137	0.0009	0.0006	0.0012	0.0009	4.4013e-05	0.0001	4.1748e-05	0.0001	5.1987e-05	7.8136e-05		2.1502	0.9065	0.7997	1.2528	0.6633	0.649	4.4101	2.9363		100	100	100	100	100	100	100	100		gamma-aminobutyrate (GABA)	Amino acid	Glutamate family (alpha-ketoglutarate derived)	141
	165	194	57	Amino acid	Glutamate family (alpha-ketoglutarate derived)	glutamate		0.7	0.71	0.79	1.04	0.97	1.29		0.002	0.0031	0.0017	0.001	0.0551	0.0162	0.7235	0.1932	0.6866	0.1303	0.0511	0.0125		1.7704	1.0628	0.8685	1.7656	0.8056	0.6511	1.2449	0.8415		100	100	100	100	100	100	100	100		glutamate	Amino acid	Glutamate family (alpha-ketoglutarate derived)	561
	166	195	33487	Amino acid	Glutamate family (alpha-ketoglutarate derived)	glutamate, gamma-methyl ester		0.89	1.15	0.85	1.31	2.68	2.16		0.3033	0.1486	0.277	0.049	0.739	0.1349	0.5361	0.1519	0.0721	0.0224	0.1164	0.0241		1.3654	0.3149	0.1003	1.0568	0.2052	0.1244	1.2121	0.2685		100	100	25	100	50	25	100	75		glutamate, gamma-methyl ester	Amino acid	Glutamate family (alpha-ketoglutarate derived)	100001103
	167	196	53	Amino acid	Glutamate family (alpha-ketoglutarate derived)	glutamine		0.47	0.57	0.33	0.39	0.31	0.39		0.0004	0.0011	5.1869e-05	0.0001	0.0002	0.0002	0.0002	0.0003	0.0002	0.0003	0.0002	0.0002		0.7759	1.3349	1.4403	0.6371	1.1421	1.1486	0.3633	0.4431		100	100	100	100	100	100	100	100		glutamine	Amino acid	Glutamate family (alpha-ketoglutarate derived)	563
	169	220	59	Amino acid	Glutamate family (alpha-ketoglutarate derived)	histidine		0.49	0.73	0.64	0.81	0.51	0.65		2.7473e-05	0.0003	0.001	0.0007	5.0465e-05	0.0001	0.0034	0.0029	3.8747e-06	2.223e-05	6.4159e-05	9.1725e-05		0.6757	1.3672	1.7359	0.4593	1.0903	1.3454	0.3334	0.8811		100	100	100	100	100	100	100	100		histidine	Amino acid	Glutamate family (alpha-ketoglutarate derived)	355
	171	221	22138	Amino acid	Glutamate family (alpha-ketoglutarate derived)	homocitrulline		0.47	0.87	0.36	1.12	0.61	1.56		0.0001	0.0005	0.0638	0.0149	0.0005	0.0005	0.4561	0.1335	0.013	0.0057	0.0371	0.01		2.2169	1.5614	0.9209	1.1917	0.5009	0.3606	1.0346	0.5631		100	100	100	100	100	100	100	100		homocitrulline	Amino acid	Glutamate family (alpha-ketoglutarate derived)	100000963
	192	227	40730	Amino acid	Glutamate family (alpha-ketoglutarate derived)	imidazole propionate		0.31	0.39	0.68	0.76	0.72	1.07		0.4416	0.1941	0.2025	0.0375	0.7377	0.1349	0.5465	0.1542	0.441	0.0935	0.7755	0.1095		2.2296	1.2015	1.1318	1.7679	1.0727	0.7551	0.6875	0.8113		75	75	100	100	100	100	50	100		imidazole propionate	Amino acid	Glutamate family (alpha-ketoglutarate derived)	100003434
	172	283	33953	Amino acid	Glutamate family (alpha-ketoglutarate derived)	N-acetylarginine		0.67	0.78	0.66	0.87	0.85	1.24		0.093	0.0562	0.217	0.0395	0.0778	0.0212	0.3976	0.1184	0.5171	0.1045	0.4091	0.0664		1.5694	1.1457	0.8867	1.3433	0.8642	0.6056	1.0511	0.7516		100	100	100	100	100	100	100	100		N-acetylarginine	Amino acid	Glutamate family (alpha-ketoglutarate derived)	100001266
	173	289	15720	Amino acid	Glutamate family (alpha-ketoglutarate derived)	N-acetylglutamate		0.53	0.44	0.32	0.2	1.29	0.61		0.0172	0.0159	0.0042	0.0019	0.008	0.0032	0.0044	0.0035	0.4447	0.0935	0.0856	0.0188		3.0391	0.8835	0.2192	3.6319	1.3839	0.461	1.5986	0.2817		100	100	100	100	100	100	100	100		N-acetylglutamate	Amino acid	Glutamate family (alpha-ketoglutarate derived)	100000282
	174	290	33943	Amino acid	Glutamate family (alpha-ketoglutarate derived)	N-acetylglutamine		0.26	0.29	0.19	0.15	0.52	0.37		0.0008	0.0017	0.0013	0.0008	0.0041	0.002	0.0035	0.0029	0.0632	0.0205	0.0224	0.0066		2.6236	1.4075	0.5019	2.3579	1.7183	0.7197	0.6854	0.2631		100	100	100	100	100	100	100	100		N-acetylglutamine	Amino acid	Glutamate family (alpha-ketoglutarate derived)	100001253
	177	295	34387	Amino acid	Glutamate family (alpha-ketoglutarate derived)	N-acetylproline		1.51	1.99	1.14	1.52	1.71	2.43		0.0014	0.0023	6.8763e-06	3.2161e-05	0.1675	0.0394	0.0045	0.0035	0.0013	0.001	6.9054e-05	9.6374e-05		1.3309	1.0109	0.6723	1.0094	0.7547	0.4723	2.0124	1.1481		100	100	100	100	100	100	100	100		N-acetylproline	Amino acid	Glutamate family (alpha-ketoglutarate derived)	100001334
	198	303	43249	Amino acid	Glutamate family (alpha-ketoglutarate derived)	N-delta-acetylornithine		0.87	1.93	0.82	1.89	0.97	2.66		0.0237	0.0196	1.7332e-05	5.8546e-05	0.0534	0.0161	3.8486e-06	5.8274e-05	0.5475	0.1093	2.4543e-07	3.5965e-06		1.5854	1.227	1.0269	0.7162	0.5284	0.377	1.3835	1.0012		100	100	100	100	100	100	100	100		N-delta-acetylornithine	Amino acid	Glutamate family (alpha-ketoglutarate derived)	100004523
	190	313	31532	Amino acid	Glutamate family (alpha-ketoglutarate derived)	N-methylglutamate		1.32	1.95	1.32	1.54	1.47	1.73		0.0006	0.0014	2.5326e-05	7.6993e-05	0.0011	0.0008	2.5032e-05	9.8267e-05	0.0008	0.0007	9.8332e-06	2.8819e-05		1.2534	1.022	0.9203	0.8512	0.8801	0.7802	1.6589	1.3511		100	100	100	100	100	100	100	100		N-methylglutamate	Amino acid	Glutamate family (alpha-ketoglutarate derived)	100001131
	185	317	37431	Amino acid	Glutamate family (alpha-ketoglutarate derived)	N-methylproline		1.95	4.02	1.87	4.88	1.92	5.73		0.0008	0.0018	0.0002	0.0002	0.0002	0.0003	2.2456e-05	9.5207e-05	0.0002	0.0002	2.2075e-07	3.5965e-06		0.9937	1.127	1.0971	0.4833	0.4325	0.3683	1.9406	2.1102		100	100	100	100	100	100	100	100		N-methylproline	Amino acid	Glutamate family (alpha-ketoglutarate derived)	100001956
	202	318	43586	Amino acid	Glutamate family (alpha-ketoglutarate derived)	N-monomethylarginine		0.8	0.79	0.92	1.17	0.88	1.04		0.1207	0.0689	0.0882	0.019	0.0381	0.0122	0.0768	0.032	0.0994	0.0292	0.5913	0.088		0.7231	1.1816	1.2377	0.7385	0.9324	1.0474	0.5804	1.0882		100	100	100	100	100	100	100	100		N-monomethylarginine	Amino acid	Glutamate family (alpha-ketoglutarate derived)	100004488
	178	326	1493	Amino acid	Glutamate family (alpha-ketoglutarate derived)	ornithine		0.7	0.63	1.36	0.74	1.42	0.51		0.0213	0.0182	0.0188	0.0059	0.0061	0.0027	0.0416	0.0197	0.021	0.0082	0.0009	0.0006		1.0511	0.7834	0.7485	1.1743	1.4342	2.0755	0.7395	1.0658		100	100	100	100	100	100	100	100		ornithine	Amino acid	Glutamate family (alpha-ketoglutarate derived)	444
	179	346	1898	Amino acid	Glutamate family (alpha-ketoglutarate derived)	proline		19.79	12.89	5.99	4.69	3.77	4.06		0.0001	0.0005	0.0002	0.0003	1.0326e-06	1.3689e-05	2.0489e-05	9.0875e-05	2.8464e-07	5.3467e-06	1.1359e-06	7.3981e-06		0.2147	0.6959	1.1069	0.3297	0.8883	1.0259	4.2492	4.1697		100	100	100	100	100	100	100	100		proline	Amino acid	Glutamate family (alpha-ketoglutarate derived)	480
	180	353	46225	Amino acid	Glutamate family (alpha-ketoglutarate derived)	pyroglutamine*		0.67	0.86	0.99	1.53	0.96	1.5		0.0404	0.0293	0.2689	0.048	0.9684	0.169	0.0001	0.0002	0.5131	0.1042	0.0001	0.0002		1.0692	1.3537	1.4031	0.8325	0.8755	0.898	0.7176	1.3434		100	100	100	100	100	100	100	100		pyroglutamine*	Amino acid	Glutamate family (alpha-ketoglutarate derived)	100001540
	182	383	34384	Amino acid	Glutamate family (alpha-ketoglutarate derived)	stachydrine		1.07	4.31	1.12	4.08	1.19	4.17		0.6293	0.2641	0.0003	0.0003	0.5216	0.1027	0.0008	0.001	0.395	0.0858	0.0001	0.0001		1.3996	1.4191	1.3376	0.3469	0.3891	0.3805	1.4944	1.5856		100	100	100	100	100	100	100	100		stachydrine	Amino acid	Glutamate family (alpha-ketoglutarate derived)	100001296
	184	403	32306	Amino acid	Glutamate family (alpha-ketoglutarate derived)	trans-4-hydroxyproline		3.14	3.79	1.89	2.53	1.99	2.52		0.0003	0.0009	1.3753e-07	2.0906e-06	3.375e-06	2.003e-05	3.9263e-05	0.0001	2.5015e-06	2.0884e-05	5.513e-05	8.0787e-05		0.7098	1.1436	1.0897	0.5888	0.8572	0.859	2.2297	2.1656		100	100	100	100	100	100	100	100		trans-4-hydroxyproline	Amino acid	Glutamate family (alpha-ketoglutarate derived)	1001
	187	405	607	Amino acid	Glutamate family (alpha-ketoglutarate derived)	trans-urocanate		0.86	0.48	1.38	0.79	1.41	0.86		0.6079	0.2579	0.1037	0.0215	0.6265	0.1199	0.4358	0.1287	0.5989	0.1184	0.46	0.0725		1.028	0.7745	0.7567	1.8308	1.3437	1.24	0.8826	1.0675		100	100	100	100	100	100	100	100		trans-urocanate	Amino acid	Glutamate family (alpha-ketoglutarate derived)	537
	280	83	48487	Amino acid	Glutathione metabolism	4-hydroxy-nonenal-glutathione		14.73	8.71	3.73	1.75	1.54	2.29		0.0047	0.006	0.0043	0.002	0.3107	0.0663	0.8958	0.2261	0.9702	0.1711	0.5856	0.0876		0.0364	0.6971	1.6898	0.0616	1.4881	1.1341	0.5363	2.5995		50	100	100	75	100	100	100	100		4-hydroxy-nonenal-glutathione	Amino acid	Glutathione metabolism	100006240
	271	92	1494	Amino acid	Glutathione metabolism	5-oxoproline		0.47	0.58	0.37	0.45	0.27	0.38		3.6193e-05	0.0003	0.0048	0.0022	0.0008	0.0007	0.0003	0.0005	6.1087e-05	0.0001	0.0007	0.0005		0.8023	1.488	2.0151	0.6531	1.2226	1.4386	0.3803	0.5482		100	100	100	100	100	100	100	100		5-oxoproline	Amino acid	Glutathione metabolism	1021
	272	143	46734	Amino acid	Glutathione metabolism	cysteine-glutathione disulfide		1.38	1.28	0.97	1.16	0.69	1.21		0.0764	0.0469	0.1715	0.0325	0.4599	0.0925	0.004	0.0032	0.021	0.0082	0.0082	0.0029		0.1967	1.2136	1.6956	0.211	1.0129	0.9697	0.271	1.1761		100	100	100	100	100	100	100	100		cysteine-glutathione disulfide	Amino acid	Glutathione metabolism	100001437
	274	199	38783	Amino acid	Glutathione metabolism	glutathione, oxidized (GSSG)		3.33	9.46	1.22	1.65	2.05	2.95		0.0005	0.0012	0.0217	0.0062	0.103	0.0261	0.0037	0.003	0.0007	0.0006	0.0036	0.0016		0.5974	1.5278	0.9071	0.2103	1.1293	0.6309	1.9887	1.8585		100	100	100	100	100	100	100	100		glutathione, oxidized (GSSG)	Amino acid	Glutathione metabolism	448
	275	200	2127	Amino acid	Glutathione metabolism	glutathione, reduced (GSH)		23.99	58.76	12.3	7.06	1.82	1.1		0.0476	0.0333	0.022	0.0063	0.0006	0.0006	0.0011	0.0012	0.1134	0.0319	0.6522	0.096		0.1254	0.564	3.8152	0.0512	0.983	6.3235	3.0085	6.9373		100	100	100	100	100	100	100	100		glutathione, reduced (GSH)	Amino acid	Glutathione metabolism	496
	278	319	39251	Amino acid	Glutathione metabolism	norophthalmate*		1.58	1.7	0.72	0.81	0.82	1.78		0.0521	0.0355	0.0434	0.0107	0.0174	0.0062	0.2451	0.081	0.0609	0.0201	0.0321	0.0089		0.9407	1.2549	1.1068	0.8722	1.12	0.5103	1.4864	0.9063		100	100	100	100	100	100	100	100		norophthalmate*	Amino acid	Glutathione metabolism	100002287
	276	325	34592	Amino acid	Glutathione metabolism	ophthalmate		1.27	1.56	0.57	0.9	0.59	1.68		0.143	0.0799	0.0158	0.0053	0.0011	0.0008	0.59	0.165	0.0016	0.0011	0.0018	0.0009		0.8641	1.7176	1.66	0.7014	1.0842	0.5793	1.0942	0.9753		100	100	100	100	100	100	100	100		ophthalmate	Amino acid	Glutathione metabolism	100001311
	277	377	33944	Amino acid	Glutathione metabolism	S-methylglutathione		2.49	2.41	1.39	2.04	1.8	2.72		0.0053	0.0064	0.0005	0.0004	0.0009	0.0008	9.267e-05	0.0002	4.6583e-05	0.0001	2.3573e-05	4.5327e-05		0.6966	1.3402	1.0337	0.7205	0.9144	0.6864	1.738	1.8642		100	100	100	100	100	100	100	100		S-methylglutathione	Amino acid	Glutathione metabolism	100001259
	5	127	3141	Amino acid	Serine family (phosphoglycerate derived)	betaine		1.31	2.7	1.14	4.37	1.54	4.37		0.6392	0.2675	0.0703	0.016	0.2229	0.0499	0.0002	0.0004	0.1824	0.0465	0.0002	0.0002		0.8432	1.0657	0.7945	0.4101	0.2791	0.2791	1.1075	1.2197		75	100	100	50	0	0	100	100		betaine	Amino acid	Serine family (phosphoglycerate derived)	799
	7	142	31453	Amino acid	Serine family (phosphoglycerate derived)	cysteine		1.58	1.82	0.97	1.45	0.84	1.44		0.0299	0.023	0.0127	0.0044	0.8016	0.1435	0.0047	0.0036	0.1573	0.0415	0.0059	0.0022		0.3414	1.5107	1.7333	0.2951	1.0056	1.0131	0.5378	1.459		100	100	100	100	100	100	100	100		cysteine	Amino acid	Serine family (phosphoglycerate derived)	800
	9	144	39512	Amino acid	Serine family (phosphoglycerate derived)	cystine		1	1	1.68	1.68	1.21	1.5						0.1866	0.0428	0.1866	0.0659	0.7125	0.1336	0.2923	0.0507		0.7094	0.7094	0.987	0.7094	0.7094	0.7945	0.7094	1.1906		0	0	100	0	0	50	0	75		cystine	Amino acid	Serine family (phosphoglycerate derived)	279
	11	208	11777	Amino acid	Serine family (phosphoglycerate derived)	glycine		1.12	1.34	0.69	0.92	0.45	0.6		0.2873	0.144	0.0191	0.0059	0.0211	0.0073	0.2272	0.0757	3.5673e-05	9.9274e-05	8.3783e-05	0.0001		0.314	1.4018	2.141	0.2622	1.0502	1.6063	0.3502	0.9663		100	100	100	100	100	100	100	100		glycine	Amino acid	Serine family (phosphoglycerate derived)	340
	13	222	15128	Amino acid	Serine family (phosphoglycerate derived)	homocysteine		0.36	0.42	0.15	0.16	0.12	0.14		0.0047	0.006	0.0002	0.0003	9.5845e-05	0.0002	1.0223e-05	7.4742e-05	2.6738e-05	8.3709e-05	5.7815e-06	2.4206e-05		0.4365	1.0614	1.3255	0.3711	0.9789	1.113	0.1563	0.1563		100	100	100	100	100	100	25	0		homocysteine	Amino acid	Serine family (phosphoglycerate derived)	311
	17	297	37076	Amino acid	Serine family (phosphoglycerate derived)	N-acetylserine		0.56	0.5	0.42	0.31	0.61	0.54		0.0166	0.0154	0.0084	0.0032	0.0212	0.0073	0.007	0.0047	0.1451	0.0385	0.0499	0.0124		1.3831	1.0135	0.6937	1.5617	1.3829	0.7943	0.776	0.4257		100	100	100	100	100	100	100	100		N-acetylserine	Amino acid	Serine family (phosphoglycerate derived)	100001851
	28	298	48187	Amino acid	Serine family (phosphoglycerate derived)	N-acetyltaurine		1.57	2.73	1.71	2.92	2.14	3.08		6.3239e-06	0.0001	7.547e-08	1.5296e-06	0.0034	0.0018	0.0001	0.0002	0.001	0.0008	0.0002	0.0002		1.0407	1.1172	0.8942	0.5998	0.656	0.6206	1.6372	1.914		100	100	100	100	100	100	100	100		N-acetyltaurine	Amino acid	Serine family (phosphoglycerate derived)	100005466
	19	321	15947	Amino acid	Serine family (phosphoglycerate derived)	O-acetylserine		0.47	0.58	0.09	0.18	0.1	0.21		0.0093	0.0098	0.0286	0.0076	0.0002	0.0003	0.002	0.0019	0.0002	0.0003	0.0027	0.0013		0.7732	2.3935	2.2164	0.6288	1.216	1.0835	0.365	0.2222		100	100	100	100	100	100	100	100		O-acetylserine	Amino acid	Serine family (phosphoglycerate derived)	100000286
	24	370	47897	Amino acid	Serine family (phosphoglycerate derived)	S-carboxymethyl-L-cysteine		0.26	0.26	0.34	0.35	0.43	0.46		1.0995e-05	0.0002	4.2113e-05	9.8484e-05	0.0019	0.0011	0.0011	0.0012	0.0026	0.0017	0.0026	0.0013		1.4787	1.1658	0.9163	1.4808	1.1382	0.8565	0.381	0.3981		100	100	100	100	100	100	100	100		S-carboxymethyl-L-cysteine	Amino acid	Serine family (phosphoglycerate derived)	100002324
	20	372	1648	Amino acid	Serine family (phosphoglycerate derived)	serine		2.58	2.58	2.04	2.2	1.38	1.66		3.4493e-06	0.0001	1.9656e-06	1.4939e-05	6.2834e-06	3.0317e-05	6.8537e-07	2.4215e-05	0.0009	0.0007	8.5279e-06	2.8819e-05		0.4327	0.9223	1.3625	0.4331	0.8541	1.1334	1.1165	1.8804		100	100	100	100	100	100	100	100		serine	Amino acid	Serine family (phosphoglycerate derived)	503
	23	376	39592	Amino acid	Serine family (phosphoglycerate derived)	S-methylcysteine		1.41	1.71	1.38	1.46	0.87	1.03		0.1831	0.0985	0.0669	0.0154	0.0244	0.0082	0.0132	0.008	0.1682	0.0437	0.7819	0.1099		0.4033	1.0198	1.6211	0.3332	0.9642	1.3579	0.5687	1.4049		100	100	100	100	100	100	100	100		S-methylcysteine	Amino acid	Serine family (phosphoglycerate derived)	100002749
	29	390	46960	Amino acid	Serine family (phosphoglycerate derived)	sulfate*		1.18	1.25	1.23	1.2	1.18	1.09		0.024	0.0197	0.0066	0.0027	0.0013	0.0009	0.0045	0.0035	0.0062	0.0033	0.0965	0.0208		0.9825	0.9573	0.9965	0.9221	0.9812	1.0861	1.156	1.179		100	100	100	100	100	100	100	100		sulfate*	Amino acid	Serine family (phosphoglycerate derived)	100002528
	21	394	2125	Amino acid	Serine family (phosphoglycerate derived)	taurine		3.15	2.85	2.1	1.74	2.06	1.88		7.4139e-05	0.0005	0.0002	0.0003	0.001	0.0008	0.0009	0.001	0.0002	0.0003	0.0004	0.0003		0.7104	0.8987	0.9145	0.7868	1.0823	1.0014	2.2407	1.8865		100	100	100	100	100	100	100	100		taurine	Amino acid	Serine family (phosphoglycerate derived)	512
	335	117	575	Carbohydrate	Amino sugar and nucleotide sugar	arabinose		2.79	3.25	1.25	1.38	1.37	1.52		0.3279	0.1565	0.2384	0.043	0.7193	0.1326	0.5077	0.145	0.5196	0.1047	0.3481	0.0588		1.0614	1.0819	0.9858	0.9102	0.98	0.8864	2.9609	1.3495		100	100	100	100	100	100	100	100		arabinose	Carbohydrate	Amino sugar and nucleotide sugar	828
	336	118	38075	Carbohydrate	Amino sugar and nucleotide sugar	arabitol		0.85	1.45	0.57	1.12	0.63	1.19		0.3344	0.1589	0.158	0.0308	0.0036	0.0019	0.342	0.1054	0.0075	0.0037	0.2309	0.0415		1.1443	1.6786	1.5188	0.6741	0.8525	0.802	0.9761	0.9555		100	100	100	100	100	100	100	100		arabitol	Carbohydrate	Amino sugar and nucleotide sugar	100000012
	337	119	37516	Carbohydrate	Amino sugar and nucleotide sugar	arabonate		0.52	0.82	0.56	0.81	0.65	0.86		0.0083	0.009	0.237	0.0429	0.0038	0.0019	0.0465	0.0216	0.0016	0.0011	0.3284	0.056		1.1288	1.5901	1.3625	0.7125	1.0916	1.0372	0.5841	0.889		100	100	100	100	100	100	100	100		arabonate	Carbohydrate	Amino sugar and nucleotide sugar	100001937
	338	158	20699	Carbohydrate	Amino sugar and nucleotide sugar	erythritol		0.45	1.19	0.42	1.34	0.45	1.3		5.946e-06	0.0001	0.0109	0.0039	2.9913e-05	9.3286e-05	0.0056	0.004	1.1029e-05	4.3615e-05	0.0042	0.0018		1.7262	2.7373	2.5331	0.6458	0.8542	0.8803	0.769	1.147		100	100	100	100	100	100	100	100		erythritol	Carbohydrate	Amino sugar and nucleotide sugar	100000846
	339	159	42420	Carbohydrate	Amino sugar and nucleotide sugar	erythronate*		0.98	0.83	1.17	1.06	1.13	1.19		0.7643	0.3085	0.0097	0.0035	0.0974	0.0249	0.4965	0.143	0.1256	0.0345	0.0361	0.0098		0.577	1.0517	1.0905	0.6783	1.1658	1.0343	0.5662	1.2327		100	100	100	100	100	100	100	100		erythronate*	Carbohydrate	Amino sugar and nucleotide sugar	100001320
	344	190	580	Carbohydrate	Amino sugar and nucleotide sugar	glucosamine-6-phosphate		1.75	0.9	0.49	0.48	0.56	0.75		0.0527	0.0358	0.8776	0.1273	0.0493	0.015	0.0318	0.0159	0.057	0.019	0.4883	0.0765		0.7428	1.2559	1.0879	1.4453	1.2774	0.8162	1.3023	0.6104		100	100	100	100	100	100	100	100		glucosamine-6-phosphate	Carbohydrate	Amino sugar and nucleotide sugar	290
	341	256	38299	Carbohydrate	Amino sugar and nucleotide sugar	maltol		0.54	0.46	0.26	0.23	0.45	0.73		0.034	0.0254	0.0168	0.0054	0.0015	0.001	0.0001	0.0002	0.0016	0.0011	0.0803	0.0181		0.9553	2.023	1.1771	1.1208	2.3053	0.7337	0.5115	0.5326		100	100	100	100	100	100	75	100		maltol	Carbohydrate	Amino sugar and nucleotide sugar	100002362
	349	287	15741	Carbohydrate	Amino sugar and nucleotide sugar	N-acetyl-glucosamine 1-phosphate		0.9	1.36	0.84	1.16	1.11	1.27		0.2643	0.1345	0.0365	0.0092	0.5715	0.1117	0.4701	0.1369	0.6275	0.1228	0.2632	0.0461		2.663	0.9626	0.7291	1.7549	0.694	0.6363	2.3834	0.8062		100	100	100	100	75	75	100	100		N-acetyl-glucosamine 1-phosphate	Carbohydrate	Amino sugar and nucleotide sugar	1212
	350	288	15107	Carbohydrate	Amino sugar and nucleotide sugar	N-acetylglucosamine 6-phosphate		3.19	2.91	0.54	0.45	0.92	0.84		0.0104	0.0107	0.0155	0.0052	0.0408	0.0128	0.0164	0.0093	0.1842	0.0466	0.1543	0.0301		0.7563	1.2373	0.7361	0.8275	1.5071	0.8069	2.4119	0.6742		25	100	50	100	100	75	100	0		N-acetylglucosamine 6-phosphate	Carbohydrate	Amino sugar and nucleotide sugar	1213
	353	358	15772	Carbohydrate	Amino sugar and nucleotide sugar	ribitol		1.83	0.91	5.59	1.44	6.65	1.72		0.0093	0.0098	0.9593	0.1372	0.0033	0.0018	0.2453	0.081	0.0022	0.0015	0.1328	0.0267		0.6674	0.3647	0.3066	1.3439	1.4136	1.1837	1.2238	2.0375		100	75	50	100	100	100	100	100		ribitol	Carbohydrate	Amino sugar and nucleotide sugar	100000406
	354	360	27731	Carbohydrate	Amino sugar and nucleotide sugar	ribonate		0.44	0.38	0.45	0.43	0.57	0.4		0.0014	0.0023	0.0084	0.0032	0.0041	0.002	0.0027	0.0024	0.0147	0.0062	0.0021	0.0011		0.8684	1.3049	1.0311	1.0249	1.3777	1.4714	0.3853	0.5862		100	100	100	100	100	100	100	100		ribonate	Carbohydrate	Amino sugar and nucleotide sugar	100001007
	355	361	1471	Carbohydrate	Amino sugar and nucleotide sugar	ribose		0.99	0.98	0.9	0.68	0.74	0.53		0.8181	0.3252	0.7513	0.1116	0.4334	0.0879	0.0363	0.0177	0.0685	0.0215	0.0103	0.0035		0.7648	1.033	1.2643	0.7732	1.3692	1.747	0.7554	0.9332		100	100	100	100	100	100	100	100		ribose	Carbohydrate	Amino sugar and nucleotide sugar	914
	357	364	35855	Carbohydrate	Amino sugar and nucleotide sugar	ribulose		0.49	0.47	0.66	0.67	0.68	0.74		0.0179	0.0164	0.0196	0.0059	0.0866	0.0231	0.0935	0.038	0.1014	0.0293	0.1566	0.0305		0.7876	1.2075	1.1714	0.8124	1.1902	1.0778	0.3843	0.7954		100	100	100	100	100	100	100	100		ribulose	Carbohydrate	Amino sugar and nucleotide sugar	100000147
	345	365	37288	Carbohydrate	Amino sugar and nucleotide sugar	ribulose/xylulose 5-phosphate		2.94	1.41	0.31	0.3	0.35	0.54		0.001	0.002	0.2774	0.049	0.0041	0.002	0.0018	0.0018	0.0023	0.0015	0.0759	0.0173		0.3326	1.6288	1.4531	0.6944	1.6931	0.9334	0.9791	0.5065		100	100	100	75	100	100	100	100		ribulose/xylulose 5-phosphate	Carbohydrate	Amino sugar and nucleotide sugar	100002179
	358	396	35854	Carbohydrate	Amino sugar and nucleotide sugar	threitol		0.57	1.48	0.66	2.2	0.89	2.56		0.0205	0.0178	0.0658	0.0152	0.0053	0.0024	0.0014	0.0015	0.2056	0.0506	0.0003	0.0003		1.2142	1.933	1.4449	0.4669	0.5821	0.5	0.6916	1.2813		100	100	100	100	100	100	100	100		threitol	Carbohydrate	Amino sugar and nucleotide sugar	100001419
	356	411	38670	Carbohydrate	Amino sugar and nucleotide sugar	UDP-glucose (isobar with UDP-galactose)		1	1	4.66	0.72	0.2	0.19						0.0034	0.0018	0.4455	0.1312	0.0031	0.0019	0.0049	0.002		0.0789	0.0985	2.24	0.0789	0.634	2.4573	0.0789	0.4587		0	25	100	0	100	100	25	100		UDP-glucose (isobar with UDP-galactose)	Carbohydrate	Amino sugar and nucleotide sugar	100002997
	378	412	18396	Carbohydrate	Amino sugar and nucleotide sugar	UDP-N-acetylgalactosamine		0.73	1.02	0.57	0.75	0.76	0.93		0.0504	0.0347	0.8791	0.1273	0.0021	0.0013	0.0061	0.0042	0.0678	0.0215	0.5404	0.0834		1.2996	1.2805	0.9741	0.9329	0.9847	0.7909	0.9476	0.7358		100	100	100	100	100	100	100	100		UDP-N-acetylgalactosamine	Carbohydrate	Amino sugar and nucleotide sugar	1257
	361	413	35162	Carbohydrate	Amino sugar and nucleotide sugar	UDP-N-acetylglucosamine		0.71	0.68	0.5	0.52	0.61	0.91		0.0106	0.0108	0.0074	0.0029	0.0012	0.0009	0.0025	0.0023	0.0069	0.0035	0.3702	0.0618		1.1004	1.1543	0.9437	1.1363	1.1079	0.6275	0.7765	0.5732		100	100	100	100	100	100	100	100		UDP-N-acetylglucosamine	Carbohydrate	Amino sugar and nucleotide sugar	1249
	362	431	4966	Carbohydrate	Amino sugar and nucleotide sugar	xylitol		0.73	0.75	0.58	0.67	0.61	0.68		0.031	0.0237	0.0796	0.0176	3.7791e-05	9.8182e-05	1.8904e-05	9.0875e-05	9.2187e-06	4.3291e-05	5.0551e-05	7.7976e-05		0.7735	1.2865	1.2208	0.7556	1.11	1.1026	0.5681	0.7467		100	100	100	100	100	100	100	100		xylitol	Carbohydrate	Amino sugar and nucleotide sugar	543
	363	432	35638	Carbohydrate	Amino sugar and nucleotide sugar	xylonate		0.55	0.84	0.53	0.87	0.61	0.87		0.0046	0.006	0.2847	0.0499	0.0001	0.0002	0.1887	0.0661	0.0004	0.0004	0.2382	0.0426		1.0135	1.7125	1.4938	0.6654	1.0389	1.047	0.5594	0.9059		100	100	100	100	100	100	100	100		xylonate	Carbohydrate	Amino sugar and nucleotide sugar	100001627
	364	433	15581	Carbohydrate	Amino sugar and nucleotide sugar	xylose		0.98	0.81	0.9	0.72	0.86	0.66		0.7313	0.2974	0.0337	0.0086	0.4043	0.0825	0.0405	0.0192	0.2819	0.0652	0.0207	0.0062		0.5842	1.04	1.0879	0.7041	1.3044	1.4166	0.5706	0.9401		100	100	100	100	100	100	100	100		xylose	Carbohydrate	Amino sugar and nucleotide sugar	826
	365	434	18344	Carbohydrate	Amino sugar and nucleotide sugar	xylulose		0.65	0.59	0.47	0.54	0.61	0.69		0.0381	0.0279	0.0242	0.0067	0.0038	0.0019	0.0104	0.0066	0.0188	0.0076	0.0834	0.0184		0.986	1.3491	1.0484	1.0889	1.1792	0.9239	0.6412	0.6373		100	100	100	100	100	100	100	100		xylulose	Carbohydrate	Amino sugar and nucleotide sugar	100000421
	471	137	22158	Carbohydrate	C5 branched dibasic acid metabolism	citramalate		0.68	1.1	0.62	0.8	1.19	1.16		0.0293	0.0226	0.571	0.0872	0.0143	0.0052	0.2088	0.0716	0.3659	0.0809	0.4678	0.0735		1.4569	1.4291	0.7492	0.8999	1.1091	0.7652	0.9919	0.8894		100	100	100	100	100	100	100	100		citramalate	Carbohydrate	C5 branched dibasic acid metabolism	100000998
	472	238	35962	Carbohydrate	C5 branched dibasic acid metabolism	itaconate (methylenesuccinate)		0.35	0.57	0.32	0.38	0.4	0.44		0.0004	0.0011	0.0072	0.0028	2.9688e-06	2.003e-05	8.7526e-06	7.4742e-05	3.5212e-05	9.9274e-05	2.7354e-05	4.8587e-05		0.7904	1.5309	1.2061	0.4848	1.2832	1.1037	0.2745	0.4853		100	100	100	100	100	100	100	100		itaconate (methylenesuccinate)	Carbohydrate	C5 branched dibasic acid metabolism	100000455
	323	362	1763	Carbohydrate	Calvin cycle and pentose phosphate	ribose 1-phosphate		0.53	0.5	0.24	0.3	0.35	0.47		0.0001	0.0005	0.0004	0.0003	3.7289e-05	9.8182e-05	0.0002	0.0003	0.0006	0.0005	0.0012	0.0007		1.9155	1.3668	0.9144	2.0283	1.077	0.6814	1.0147	0.3233		100	100	100	100	100	100	100	100		ribose 1-phosphate	Carbohydrate	Calvin cycle and pentose phosphate	219
	318	363	561	Carbohydrate	Calvin cycle and pentose phosphate	ribose 5-phosphate		0.61	0.6	0.3	0.37	0.45	0.62		0.0011	0.0021	0.0007	0.0005	0.0015	0.001	0.0001	0.0002	0.0002	0.0003	0.0055	0.0022		1.9074	1.1497	0.7472	1.9468	0.9117	0.547	1.1668	0.3395		100	100	100	100	100	100	100	100		ribose 5-phosphate	Carbohydrate	Calvin cycle and pentose phosphate	19
	288	167	12021	Carbohydrate	Glycolysis	fructose-6-phosphate		1.15	0.94	0.25	0.19	0.18	0.21		0.3995	0.1802	0.8101	0.119	0.0007	0.0006	2.871e-06	5.8248e-05	3.1333e-06	2.1402e-05	9.3654e-06	2.8819e-05		0.2925	2.15	2.9302	0.3567	2.8486	2.4961	0.3363	0.5298		100	100	100	100	100	100	100	100		fructose-6-phosphate	Carbohydrate	Glycolysis	1232
	289	191	48152	Carbohydrate	Glycolysis	glucose		2.03	1.5	1.56	1.26	1.37	1.19		0.0005	0.0013	9.4788e-05	0.0001	0.0011	0.0008	0.0001	0.0002	3.0468e-06	2.1402e-05	1.7887e-05	4.0326e-05		0.4717	0.8934	1.0217	0.6358	1.1058	1.1691	0.9559	1.3955		100	100	100	100	100	100	100	100		glucose	Carbohydrate	Glycolysis	572
	291	192	31260	Carbohydrate	Glycolysis	glucose 6-phosphate		1.66	1.08	0.54	0.53	0.64	0.9		0.005	0.0062	0.5531	0.0852	0.0065	0.0028	0.0184	0.0102	0.0146	0.0062	0.5526	0.0848		1.1518	1.0501	0.8751	1.7796	1.0621	0.6294	1.9144	0.5635		100	100	100	100	100	100	100	100		glucose 6-phosphate	Carbohydrate	Glycolysis	291
	292	193	15443	Carbohydrate	Glycolysis	glucuronate		0.85	0.8	0.77	0.65	0.67	0.56		0.1646	0.0904	0.0361	0.0092	0.0025	0.0014	0.0002	0.0003	0.0002	0.0003	2.3972e-05	4.5327e-05		0.7035	1.1288	1.3025	0.7485	1.3513	1.5646	0.5984	0.8734		100	100	100	100	100	100	100	100		glucuronate	Carbohydrate	Glycolysis	100000257
	294	242	527	Carbohydrate	Glycolysis	lactate		1.2	0.87	1.23	0.88	1.3	0.96		0.3471	0.1635	0.8398	0.1227	0.4825	0.0964	0.9796	0.2415	0.4466	0.0935	0.954	0.1313		1.5781	0.6969	0.6578	2.1612	0.9719	0.8934	1.8908	0.8556		100	100	100	100	100	100	100	100		lactate	Carbohydrate	Glycolysis	482
	298	354	22250	Carbohydrate	Glycolysis	pyruvate		0.5	0.55	0.48	0.51	0.7	0.7		0.0022	0.0034	0.0058	0.0024	7.7176e-06	3.2091e-05	3.8969e-05	0.0001	0.0007	0.0006	0.0004	0.0004		1.5232	1.154	0.7973	1.3964	1.0873	0.7932	0.7688	0.5575		100	100	100	100	100	100	100	100		pyruvate	Carbohydrate	Glycolysis	823
	381	232	1481	Carbohydrate	Inositol metabolism	inositol 1-phosphate (I1P)		1.04	1.3	0.81	0.93	0.97	1.27		0.4458	0.1948	0.0608	0.0146	0.0277	0.0092	0.2877	0.0919	0.7173	0.1341	0.0103	0.0035		1.1318	1.1428	0.948	0.9059	0.9979	0.7254	1.1763	0.9233		100	100	100	100	100	100	100	100		inositol 1-phosphate (I1P)	Carbohydrate	Inositol metabolism	370
	382	233	27725	Carbohydrate	Inositol metabolism	inositol 2-phosphate (I2P)		1.11	1.65	0.8	0.88	0.83	1.23		0.342	0.1615	0.0039	0.0019	0.0464	0.0144	0.3135	0.0983	0.1212	0.0335	0.1447	0.0286		1.0723	1.1282	1.0947	0.7244	1.024	0.7324	1.1953	0.9045		100	100	100	100	100	100	100	100		inositol 2-phosphate (I2P)	Carbohydrate	Inositol metabolism	100001004
	384	270	1124	Carbohydrate	Inositol metabolism	myo-inositol		1.45	1.45	1.64	1.78	1.63	1.96		0.0008	0.0018	0.0002	0.0002	1.321e-05	4.7083e-05	7.5373e-06	7.4742e-05	1.0867e-05	4.3615e-05	1.0416e-06	7.3981e-06		0.7646	1.0404	1.0463	0.7633	0.9556	0.8659	1.1051	1.7012		100	100	100	100	100	100	100	100		myo-inositol	Carbohydrate	Inositol metabolism	363
	329	201	1572	Carbohydrate	Photorespiration	glycerate		0.86	0.99	0.81	0.91	0.93	1.02		0.0264	0.0211	0.7728	0.114	0.0002	0.0002	0.0135	0.0081	0.0487	0.0168	0.2247	0.0408		1.1786	1.1166	0.9686	1.021	0.9934	0.884	1.0092	0.9047		100	100	100	100	100	100	100	100		glycerate	Carbohydrate	Photorespiration	1052
	325	330	20694	Carbohydrate	Photorespiration	oxalate (ethanedioate)		0.89	1.23	0.76	1.05	1.12	1.47		0.0981	0.0584	0.0002	0.0002	0.0038	0.0019	0.3565	0.1088	0.0653	0.021	0.0004	0.0004		1.3735	1.2845	0.8756	0.9921	0.9312	0.6683	1.2231	0.9794		100	100	100	100	100	100	100	100		oxalate (ethanedioate)	Carbohydrate	Photorespiration	100000841
	331	393	20693	Carbohydrate	Photorespiration	tartronate (hydroxymalonate)		0.91	1.11	1.11	1.58	2.09	2.77		0.3878	0.1783	0.0767	0.0171	0.6008	0.1161	0.0371	0.0179	0.0064	0.0034	0.0013	0.0008		1.5042	0.983	0.5216	1.2327	0.6896	0.394	1.3732	1.0912		100	100	100	100	100	100	100	100		tartronate (hydroxymalonate)	Carbohydrate	Photorespiration	100000840
	469	2	20675	Carbohydrate	Sucrose, glucose,fructose metabolism	1,5-anhydroglucitol (1,5-AG)		0.52	0.89	0.64	0.99	0.61	1.46		0.0023	0.0034	0.4296	0.0704	0.0775	0.0212	0.7612	0.1992	0.0519	0.0176	0.1731	0.0332		1.4678	1.5924	1.6691	0.8491	1.0262	0.6919	0.7569	1.0119		100	100	100	100	100	100	75	100		1,5-anhydroglucitol (1,5-AG)	Carbohydrate	Sucrose, glucose,fructose metabolism	100000580
	396	4	22012	Carbohydrate	Sucrose, glucose,fructose metabolism	1-kestose		5	2.56	7.6	3.49	6.96	3.78		6.4123e-05	0.0004	0.0008	0.0006	1.2802e-06	1.3689e-05	5.335e-06	7.0684e-05	0.0002	0.0003	0.0008	0.0006		0.6969	0.4503	0.4914	1.3621	0.9818	0.906	3.4818	3.4222		100	100	75	100	100	100	100	100		1-kestose	Carbohydrate	Sucrose, glucose,fructose metabolism	100000980
	397	64	43805	Carbohydrate	Sucrose, glucose,fructose metabolism	3-deoxyoctulosonate		0.71	0.92	0.73	0.99	0.92	1.09		0.0013	0.0023	0.162	0.0312	4.3838e-05	0.0001	0.9334	0.2322	0.1642	0.0428	0.2508	0.0441		1.6596	1.0787	0.8595	1.2772	0.7945	0.7221	1.1728	0.787		100	100	100	100	100	100	100	100		3-deoxyoctulosonate	Carbohydrate	Sucrose, glucose,fructose metabolism	100000095
	400	160	27753	Carbohydrate	Sucrose, glucose,fructose metabolism	erythrose		1.8	2.52	1.77	1.88	2.39	2.46		0.067	0.0427	0.0146	0.005	0.259	0.0572	0.219	0.0742	0.1007	0.0293	0.0967	0.0208		0.765	0.7247	0.5376	0.5453	0.6806	0.5208	1.3754	1.2824		75	50	25	50	50	50	100	75		erythrose	Carbohydrate	Sucrose, glucose,fructose metabolism	100001042
	402	166	48195	Carbohydrate	Sucrose, glucose,fructose metabolism	fructose		2.96	2.26	2.8	2.02	2.28	2.1		3.7956e-05	0.0003	0.0004	0.0003	0.0001	0.0002	0.0005	0.0007	3.8803e-06	2.223e-05	8.3946e-07	7.0294e-06		0.5997	0.81	0.993	0.7882	1.1213	1.0783	1.7779	2.269		100	100	100	100	100	100	100	100		fructose	Carbohydrate	Sucrose, glucose,fructose metabolism	878
	405	171	1117	Carbohydrate	Sucrose, glucose,fructose metabolism	galactitol (dulcitol)		0.37	1.34	0.37	1.5	0.49	1.71		0.0059	0.007	0.2819	0.0495	0.049	0.015	0.5471	0.1542	0.282	0.0652	0.3934	0.0642		1.2308	1.6258	1.2489	0.3406	0.4027	0.3544	0.4557	0.6059		100	100	75	75	50	50	75	50		galactitol (dulcitol)	Carbohydrate	Sucrose, glucose,fructose metabolism	1003
	406	172	27719	Carbohydrate	Sucrose, glucose,fructose metabolism	galactonate		0.82	1.65	1.1	1.71	1.37	2.17		0.3358	0.1591	0.1304	0.0261	0.3022	0.0652	0.0192	0.0105	0.0115	0.0053	0.002	0.001		1.4218	1.131	0.9141	0.7074	0.7308	0.576	1.1648	1.2485		100	100	100	100	100	100	100	100		galactonate	Carbohydrate	Sucrose, glucose,fructose metabolism	100001026
	408	173	15706	Carbohydrate	Sucrose, glucose,fructose metabolism	galactose 1-phosphate		0.63	0.64	0.55	0.68	0.71	0.91		0.0018	0.0028	0.0165	0.0054	0.0565	0.0165	0.0973	0.0392	0.342	0.0772	0.7411	0.1062		1.8154	1.0851	0.8409	1.7897	0.8827	0.6641	1.1479	0.6012		100	100	100	100	100	100	100	100		galactose 1-phosphate	Carbohydrate	Sucrose, glucose,fructose metabolism	100000300
	412	188	20705	Carbohydrate	Sucrose, glucose,fructose metabolism	glucoheptose		0.36	0.22	0.73	0.33	1	1		0.0628	0.0405	9.9768e-05	0.0002	0.391	0.0802	0.0044	0.0035						0.921	0.4572	0.3349	1.5425	1.0012	0.3349	0.3349	0.3349		75	25	0	100	100	25	0	0		glucoheptose	Carbohydrate	Sucrose, glucose,fructose metabolism	100000852
	468	189	587	Carbohydrate	Sucrose, glucose,fructose metabolism	gluconate		0.53	0.58	0.53	0.5	0.6	0.63		0.0727	0.0452	0.1111	0.0227	0.0899	0.0236	0.075	0.0314	0.2246	0.0544	0.1861	0.0352		1.521	1.0835	0.9543	1.4036	1.1449	0.9161	0.8095	0.5734		100	100	100	100	100	100	100	100		gluconate	Carbohydrate	Sucrose, glucose,fructose metabolism	338
	420	257	15586	Carbohydrate	Sucrose, glucose,fructose metabolism	maltose		1.17	1.31	0.42	0.43	0.54	0.65		0.669	0.2787	0.3716	0.0633	0.0728	0.0201	0.0746	0.0314	0.1315	0.0353	0.2261	0.0409		1.2831	0.9951	0.7753	1.141	0.9753	0.64	1.4983	0.4169		100	100	100	100	100	100	100	100		maltose	Carbohydrate	Sucrose, glucose,fructose metabolism	913
	423	258	44688	Carbohydrate	Sucrose, glucose,fructose metabolism	maltotriose		1.51	1.35	1.56	1.03	1.7	1.37		0.0068	0.0077	0.0232	0.0065	0.0157	0.0056	0.6987	0.187	0.0007	0.0006	0.0122	0.004		0.962	0.7476	0.6861	1.0744	1.1279	0.8524	1.4554	1.1647		100	100	100	100	100	100	100	100		maltotriose	Carbohydrate	Sucrose, glucose,fructose metabolism	100000276
	425	259	15335	Carbohydrate	Sucrose, glucose,fructose metabolism	mannitol		1	1.82	0.56	1.02	0.59	1		0.9332	0.3558	0.0699	0.0159	0.0578	0.0167	0.8291	0.2128	0.0681	0.0215	0.8784	0.122		1.23	1.5388	1.4393	0.6769	0.8384	0.851	1.2351	0.8549		100	100	100	100	100	100	100	100		mannitol	Carbohydrate	Sucrose, glucose,fructose metabolism	100000277
	429	260	1469	Carbohydrate	Sucrose, glucose,fructose metabolism	mannose-6-phosphate		1.16	0.88	0.36	0.52	0.4	0.54		0.4365	0.193	0.3951	0.0658	0.0012	0.0009	0.0008	0.001	0.0002	0.0003	0.0016	0.0009		0.7461	1.4995	1.3728	0.9801	1.047	1.0044	0.866	0.5442		100	100	100	100	100	100	100	100		mannose-6-phosphate	Carbohydrate	Sucrose, glucose,fructose metabolism	294
	466	265	46144	Carbohydrate	Sucrose, glucose,fructose metabolism	methyl glucopyranoside (alpha + beta)		0.53	0.57	0.62	0.81	0.68	0.67		0.0061	0.0071	0.0066	0.0027	0.0076	0.0031	0.2001	0.0694	0.0229	0.0088	0.5812	0.0873		1.3919	1.1685	1.0699	1.3007	0.8984	1.0844	0.7372	0.726		100	100	100	100	100	100	100	100		methyl glucopyranoside (alpha + beta)	Carbohydrate	Sucrose, glucose,fructose metabolism	100005864
	437	356	586	Carbohydrate	Sucrose, glucose,fructose metabolism	raffinose		10.42	10.42	7.61	7.61	7.61	5.03		0.0075	0.0083	0.0075	0.0029	0.0095	0.0036	0.0095	0.0062	0.0095	0.0045	0.0092	0.0032		0.1722	0.1722	0.1722	0.1722	0.1722	0.2607	1.7948	1.3113		0	0	25	0	0	25	100	100		raffinose	Carbohydrate	Sucrose, glucose,fructose metabolism	879
	438	357	15826	Carbohydrate	Sucrose, glucose,fructose metabolism	rhamnose		0.56	0.76	0.8	1.2	1.32	1.61		0.0005	0.0014	0.1123	0.0229	0.1602	0.0386	0.1496	0.0558	0.0289	0.0108	0.0034	0.0015		1.4806	1.4666	0.8807	1.1045	0.9714	0.7231	0.8345	1.1662		100	100	100	100	100	100	100	100		rhamnose	Carbohydrate	Sucrose, glucose,fructose metabolism	920
	440	379	15053	Carbohydrate	Sucrose, glucose,fructose metabolism	sorbitol		1.2	1.16	1.33	1.49	1.24	1.47		0.4554	0.1979	0.5485	0.0849	0.2264	0.0506	0.1127	0.0441	0.3587	0.0795	0.1334	0.0267		0.8105	1.0766	1.1533	0.8383	0.9619	0.9752	0.9713	1.4295		100	100	100	100	100	100	100	100		sorbitol	Carbohydrate	Sucrose, glucose,fructose metabolism	506
	444	388	1519	Carbohydrate	Sucrose, glucose,fructose metabolism	sucrose		8.63	15.26	5.36	5.16	4.66	4.33		0.0009	0.0019	0.005	0.0022	0.0017	0.0011	0.0096	0.0062	0.0157	0.0065	0.0089	0.0031		1.6944	0.3961	0.4552	0.9583	0.4117	0.4908	14.6203	2.1234		100	75	75	75	50	75	100	100		sucrose	Carbohydrate	Sucrose, glucose,fructose metabolism	935
	465	389	46735	Carbohydrate	Sucrose, glucose,fructose metabolism	sucrose-6-phosphate		2.34	2.34	1.92	1.92	1.92	1.92		0.0012	0.0023	0.0012	0.0008	0.0058	0.0026	0.0058	0.0041	0.0058	0.0031	0.0058	0.0022		0.4927	0.4927	0.4927	0.4927	0.4927	0.4927	1.1516	0.9469		0	0	0	25	0	0	100	100		sucrose-6-phosphate	Carbohydrate	Sucrose, glucose,fructose metabolism	100002439
	315	53	52282	Carbohydrate	TCA cycle	2-methylcitrate/homocitrate		0.83	1.35	5.02	5.02	5.02	3.83		0.0463	0.0327	0.2133	0.039	0.0614	0.0176	0.0614	0.0269	0.0614	0.0202	0.083	0.0184		1.4401	0.0574	0.0574	0.8835	0.0574	0.0753	1.1916	0.2881		100	0	25	100	0	25	100	75		2-methylcitrate/homocitrate	Carbohydrate	TCA cycle	100008929
	303	115	528	Carbohydrate	TCA cycle	alpha-ketoglutarate		3.49	3.64	2.02	2.52	2.59	3.19		0.006	0.0071	0.0087	0.0032	0.0007	0.0006	6.1661e-05	0.0002	9.5462e-05	0.0002	2.1275e-05	4.4273e-05		1.4697	0.71	0.5556	1.4089	0.5712	0.4513	5.1254	1.4374		100	100	100	100	100	100	100	100		alpha-ketoglutarate	Carbohydrate	TCA cycle	93
	304	135	12025	Carbohydrate	TCA cycle	cis-aconitate		0.55	0.71	0.7	0.78	0.85	0.82		0.0002	0.0008	0.002	0.0011	0.0002	0.0002	0.0006	0.0008	0.0044	0.0025	0.0018	0.0009		1.0138	1.2443	1.0273	0.7816	1.1226	1.0671	0.5571	0.874		100	100	100	100	100	100	100	100		cis-aconitate	Carbohydrate	TCA cycle	1829
	313	404	27741	Carbohydrate	TCA cycle	trans-aconitate		0.56	0.71	0.69	0.78	0.86	0.82		0.0002	0.0007	0.0007	0.0005	0.0002	0.0002	0.0017	0.0017	0.0115	0.0053	0.0043	0.0018		1.0201	1.2601	1.014	0.7968	1.1119	1.0568	0.5664	0.8715		100	100	100	100	100	100	100	100		trans-aconitate	Carbohydrate	TCA cycle	100001043
	305	138	1564	Carbohydrate	TCA cycle	citrate		0.33	0.42	0.4	0.4	0.58	0.48		0.001	0.002	0.0026	0.0014	0.0091	0.0035	0.0098	0.0063	0.0536	0.0181	0.0198	0.006		1.4475	1.2713	0.874	1.1393	1.2597	1.0641	0.4814	0.5083		100	100	100	100	100	100	100	100		citrate	Carbohydrate	TCA cycle	1124
	306	169	1643	Carbohydrate	TCA cycle	fumarate		1	1.13	0.97	0.8	1.59	1.03		0.946	0.3589	0.5872	0.0895	0.6426	0.1214	0.3572	0.1088	0.3878	0.0852	0.7777	0.1096		6.9081	0.8861	0.5415	6.1045	1.0737	0.8349	6.899	0.8593		100	100	100	100	100	100	100	100		fumarate	Carbohydrate	TCA cycle	330
	307	234	12110	Carbohydrate	TCA cycle	isocitrate		1	0.83	3.51	0.74	0.91	0.35				0.391	0.0655	0.0469	0.0144	0.3619	0.1096	0.6664	0.1274	0.0425	0.0109		0.1214	0.2303	0.8907	0.1459	1.0906	2.2883	0.1214	0.8086		0	25	100	25	100	100	25	100		isocitrate	Carbohydrate	TCA cycle	1206
	308	253	1303	Carbohydrate	TCA cycle	malate		0.7	0.64	0.89	0.71	1.01	0.87		0.0049	0.0062	0.0036	0.0018	0.1658	0.0394	0.0167	0.0094	0.9447	0.1674	0.201	0.0374		1.2835	0.9723	0.8526	1.3879	1.2113	0.9956	0.8948	0.8627		100	100	100	100	100	100	100	100		malate	Carbohydrate	TCA cycle	409
	309	254	20676	Carbohydrate	TCA cycle	maleate		0.46	0.35	0.57	0.58	0.64	0.72		0.0119	0.0119	0.0031	0.0016	0.0619	0.0177	0.0538	0.0243	0.093	0.0278	0.2049	0.038		2.0069	1.1734	1.0561	2.6649	1.1691	0.9402	0.9332	0.6736		100	100	100	100	100	100	100	100		maleate	Carbohydrate	TCA cycle	100000707
	310	261	18493	Carbohydrate	TCA cycle	mesaconate (methylfumarate)		1.27	1.2	0.73	0.73	0.7	0.67		0.1232	0.0699	0.2404	0.0432	0.0065	0.0028	0.0071	0.0048	0.002	0.0014	0.0011	0.0007		0.6603	1.1605	1.214	0.6976	1.1649	1.2644	0.8384	0.8472		100	100	100	100	100	100	100	100		mesaconate (methylfumarate)	Carbohydrate	TCA cycle	100000446
	312	386	1437	Carbohydrate	TCA cycle	succinate		0.52	0.48	0.64	0.59	0.73	0.64		8.0824e-05	0.0005	0.0001	0.0002	0.0668	0.0186	0.0467	0.0216	0.1365	0.0365	0.0683	0.0157		1.9906	0.9692	0.8443	2.1759	1.0455	0.9653	1.0425	0.6182		100	100	100	100	100	100	100	100		succinate	Carbohydrate	TCA cycle	252
	867	150	1659	Cofactors, Prosthetic Groups, Electron Carriers	Ascorbate metabolism	dehydroascorbate		0.82	1.02	0.76	0.93	0.85	0.97		0.0864	0.0528	0.8724	0.1269	0.0543	0.0162	0.4961	0.143	0.1786	0.046	0.8295	0.1158		1.0623	1.1958	1.0769	0.855	0.9815	0.9367	0.8712	0.9129		100	100	100	100	100	100	100	100		dehydroascorbate	Cofactors, Prosthetic Groups, Electron Carriers	Ascorbate metabolism	301
	874	218	46957	Cofactors, Prosthetic Groups, Electron Carriers	Ascorbate metabolism	gulonic acid*		0.46	0.81	0.4	0.56	0.42	0.51		4.1437e-05	0.0003	0.0214	0.0062	8.3956e-06	3.3073e-05	0.0001	0.0002	0.0001	0.0002	0.0003	0.0002		0.9814	1.4329	1.3581	0.557	1.0161	1.1216	0.4505	0.5736		100	100	100	100	100	100	100	100		gulonic acid*	Cofactors, Prosthetic Groups, Electron Carriers	Ascorbate metabolism	100001586
	873	397	27738	Cofactors, Prosthetic Groups, Electron Carriers	Ascorbate metabolism	threonate		0.52	0.62	0.61	0.75	0.65	0.76		0.0021	0.0032	0.0049	0.0022	0.0031	0.0017	0.0144	0.0085	0.0047	0.0027	0.0132	0.0043		1.1115	1.2067	1.1341	0.9443	0.9842	0.9708	0.5816	0.7339		100	100	100	100	100	100	100	100		threonate	Cofactors, Prosthetic Groups, Electron Carriers	Ascorbate metabolism	100001022
	859	151	36747	Cofactors, Prosthetic Groups, Electron Carriers	Carnitine metabolism	deoxycarnitine		1	1	1.3	1.3	1.25	1.3						0.1668	0.0394	0.1668	0.0616	0.2297	0.0551	0.1668	0.0322		0.9224	0.9224	0.9612	0.9224	0.9224	0.9224	0.9224	1.1969		0	25	50	0	0	0	0	75		deoxycarnitine	Cofactors, Prosthetic Groups, Electron Carriers	Carnitine metabolism	100001662
	825	332	1508	Cofactors, Prosthetic Groups, Electron Carriers	CoA metabolism	pantothenate		1.08	0.98	1.21	1.01	1.25	0.87		0.3562	0.1662	0.9426	0.1352	0.1698	0.0398	0.9356	0.2322	0.0714	0.0223	0.296	0.0512		0.8954	0.9778	0.9453	0.985	1.173	1.352	0.9638	1.1791		100	100	100	100	100	100	100	100		pantothenate	Cofactors, Prosthetic Groups, Electron Carriers	CoA metabolism	1024
	826	341	15504	Cofactors, Prosthetic Groups, Electron Carriers	CoA metabolism	phosphopantetheine		4.59	4.59	2.9	1.01	0.55	0.58		0.0965	0.0578	0.0965	0.0203	0.0045	0.0021	0.9261	0.2316	0.0028	0.0017	0.2175	0.0397		0.2064	0.2984	1.5833	0.2064	0.8586	1.4988	0.9478	0.8641		0	75	100	0	100	100	75	100		phosphopantetheine	Cofactors, Prosthetic Groups, Electron Carriers	CoA metabolism	100000328
	830	307	594	Cofactors, Prosthetic Groups, Electron Carriers	Nicotinate and nicotinamide metabolism	nicotinamide		0.35	0.34	0.7	0.96	0.95	0.98		0.0007	0.0017	0.0013	0.0008	0.0771	0.0211	0.6954	0.187	0.6453	0.125	0.9897	0.1355		1.6716	1.2435	0.9166	1.7529	0.9081	0.8868	0.5924	0.8723		100	100	100	100	100	100	100	100		nicotinamide	Cofactors, Prosthetic Groups, Electron Carriers	Nicotinate and nicotinamide metabolism	432
	831	308	44685	Cofactors, Prosthetic Groups, Electron Carriers	Nicotinate and nicotinamide metabolism	nicotinamide adenine dinucleotide (NAD+)		0.74	0.77	0.72	1.06	1.11	3.12		0.0238	0.0196	0.018	0.0057	0.0574	0.0166	0.7484	0.1968	0.5548	0.1103	0.0011	0.0007		1.7469	1.1101	0.7203	1.6731	0.7491	0.2551	1.2917	0.7965		100	100	100	100	100	100	100	100		nicotinamide adenine dinucleotide (NAD+)	Cofactors, Prosthetic Groups, Electron Carriers	Nicotinate and nicotinamide metabolism	1310
	835	309	22152	Cofactors, Prosthetic Groups, Electron Carriers	Nicotinate and nicotinamide metabolism	nicotinamide ribonucleotide (NMN)		0.67	0.66	0.51	0.54	0.56	0.86		0.0023	0.0034	8.5864e-05	0.0001	3.8732e-05	9.8182e-05	3.3575e-05	0.0001	5.1595e-05	0.0001	0.2346	0.0421		1.0541	1.2102	1.0861	1.0695	1.1369	0.7156	0.707	0.6131		100	100	100	100	100	100	100	100		nicotinamide ribonucleotide (NMN)	Cofactors, Prosthetic Groups, Electron Carriers	Nicotinate and nicotinamide metabolism	1312
	836	310	33013	Cofactors, Prosthetic Groups, Electron Carriers	Nicotinate and nicotinamide metabolism	nicotinamide riboside		0.29	0.25	0.39	0.46	0.46	0.24		0.0001	0.0005	0.0003	0.0003	0.0029	0.0016	0.0055	0.004	0.0074	0.0037	0.0028	0.0013		0.9683	1.1123	0.9474	1.1355	0.9418	1.815	0.2796	0.4322		100	100	100	100	100	100	100	100		nicotinamide riboside	Cofactors, Prosthetic Groups, Electron Carriers	Nicotinate and nicotinamide metabolism	100001310
	837	311	1504	Cofactors, Prosthetic Groups, Electron Carriers	Nicotinate and nicotinamide metabolism	nicotinate		0.99	1.65	1.53	2.16	2.37	2.28		0.886	0.3466	0.0215	0.0062	0.0928	0.0241	0.0138	0.0082	0.0134	0.0058	0.0121	0.004		3.3772	0.8923	0.5762	2.0305	0.6311	0.5983	3.3578	1.3642		100	100	100	100	100	100	100	100		nicotinate	Cofactors, Prosthetic Groups, Electron Carriers	Nicotinate and nicotinamide metabolism	567
	839	312	33471	Cofactors, Prosthetic Groups, Electron Carriers	Nicotinate and nicotinamide metabolism	nicotinate ribonucleoside		0.4	0.45	0.6	0.86	0.83	1.27		5.2498e-06	0.0001	7.3107e-05	0.0001	0.0073	0.003	0.1146	0.0445	0.0663	0.0211	0.0506	0.0125		3.7231	1.2548	0.9092	3.361	0.8811	0.5943	1.4958	0.7562		100	100	100	100	100	100	100	100		nicotinate ribonucleoside	Cofactors, Prosthetic Groups, Electron Carriers	Nicotinate and nicotinamide metabolism	100001316
	840	406	32401	Cofactors, Prosthetic Groups, Electron Carriers	Nicotinate and nicotinamide metabolism	trigonelline (N'-methylnicotinate)		0.32	0.46	0.82	1.06	1.09	1.12		5.5658e-07	4.403e-05	0.0004	0.0003	0.0551	0.0162	0.4854	0.1406	0.0756	0.0233	0.1632	0.0317		2.3756	1.211	0.9076	1.6505	0.9322	0.889	0.7574	0.9918		100	100	100	100	100	100	100	100		trigonelline (N'-methylnicotinate)	Cofactors, Prosthetic Groups, Electron Carriers	Nicotinate and nicotinamide metabolism	100001092
	853	97	15488	Cofactors, Prosthetic Groups, Electron Carriers	Oxidative phosphorylation	acetylphosphate		1.99	1.04	0.46	0.34	0.37	0.36		0.0731	0.0452	0.9654	0.1378	0.0803	0.0217	0.0249	0.0131	0.0319	0.0117	0.0332	0.0092		0.4005	1.478	1.847	0.7687	2.0088	1.8784	0.7982	0.6771		100	100	100	100	100	100	100	75		acetylphosphate	Cofactors, Prosthetic Groups, Electron Carriers	Oxidative phosphorylation	1211
	854	266	37070	Cofactors, Prosthetic Groups, Electron Carriers	Oxidative phosphorylation	methylphosphate		0.95	1.04	0.53	0.61	1.01	1.27		0.7308	0.2974	0.7259	0.1087	0.0068	0.0028	0.0048	0.0036	0.9439	0.1674	0.1103	0.0232		3.0904	1.0497	0.5463	2.8284	0.9029	0.4336	2.9299	0.5526		100	100	100	100	100	100	100	100		methylphosphate	Cofactors, Prosthetic Groups, Electron Carriers	Oxidative phosphorylation	100001805
	855	339	42109	Cofactors, Prosthetic Groups, Electron Carriers	Oxidative phosphorylation	phosphate		1.05	1.02	1.01	1.12	0.98	1.07		0.1214	0.0691	0.6104	0.0928	0.7351	0.1348	0.0119	0.0074	0.5255	0.1056	0.1256	0.0255		0.9738	1.0214	1.0549	1.003	0.9206	0.9657	1.0257	1.0339		100	100	100	100	100	100	100	100		phosphate	Cofactors, Prosthetic Groups, Electron Carriers	Oxidative phosphorylation	461
	860	164	2134	Cofactors, Prosthetic Groups, Electron Carriers	Riboflavin and FAD metabolism	flavin adenine dinucleotide (FAD)		0.31	0.39	0.57	0.9	1.02	1.72		0.0161	0.0152	0.0288	0.0076	0.001	0.0008	0.2204	0.0744	0.8682	0.1564	0.0009	0.0006		3.0147	1.5676	0.8861	2.4195	0.9993	0.5229	0.9419	0.9012		100	100	100	100	100	100	100	100		flavin adenine dinucleotide (FAD)	Cofactors, Prosthetic Groups, Electron Carriers	Riboflavin and FAD metabolism	327
	862	165	15797	Cofactors, Prosthetic Groups, Electron Carriers	Riboflavin and FAD metabolism	flavin mononucleotide (FMN)		1.03	1.27	0.25	0.38	0.36	0.96		0.8467	0.3345	0.0679	0.0156	0.0003	0.0003	0.0018	0.0018	0.0044	0.0025	0.916	0.1269		1.6021	1.2542	0.876	1.2942	0.8277	0.3305	1.6473	0.3164		100	100	100	100	100	75	100	100		flavin mononucleotide (FMN)	Cofactors, Prosthetic Groups, Electron Carriers	Riboflavin and FAD metabolism	100000251
	861	359	1827	Cofactors, Prosthetic Groups, Electron Carriers	Riboflavin and FAD metabolism	riboflavin (Vitamin B2)		0.46	0.54	0.57	0.71	0.64	0.76		0.0005	0.0013	0.003	0.0016	0.0069	0.0028	0.0384	0.0183	0.021	0.0082	0.0857	0.0188		1.4957	1.1567	1.0336	1.2639	0.9253	0.8703	0.6843	0.6599		100	100	100	100	100	100	100	100		riboflavin (Vitamin B2)	Cofactors, Prosthetic Groups, Electron Carriers	Riboflavin and FAD metabolism	500
	881	395	5341	Cofactors, Prosthetic Groups, Electron Carriers	Thiamine metabolism	thiamin (Vitamin B1)		0.8	1.54	2.08	2.25	2.41	2.41		0.113	0.0653	0.0287	0.0076	0.0932	0.0241	0.0732	0.0309	0.0632	0.0205	0.0632	0.0148		1.6036	0.4886	0.4227	0.8313	0.4521	0.4227	1.2782	1.0168		100	50	0	100	25	25	100	75		thiamin (Vitamin B1)	Cofactors, Prosthetic Groups, Electron Carriers	Thiamine metabolism	873
	882	116	1561	Cofactors, Prosthetic Groups, Electron Carriers	Tocopherol metabolism	alpha-tocopherol		0.89	1.45	0.54	1.04	1.09	1.19		0.9204	0.3543	0.3836	0.065	0.2872	0.0625	0.886	0.2241	0.6994	0.132	0.391	0.064		1.3635	0.7874	0.3914	0.835	0.4119	0.3595	1.2092	0.4284		75	50	25	100	25	25	100	25		alpha-tocopherol	Cofactors, Prosthetic Groups, Electron Carriers	Tocopherol metabolism	1105
	890	350	1651	Cofactors, Prosthetic Groups, Electron Carriers	Vitamin B metabolism (B6 or B12)	pyridoxal		0.52	0.65	0.63	0.82	0.73	0.96		0.0004	0.0011	0.0021	0.0012	0.0017	0.0011	0.0343	0.0169	0.0071	0.0036	0.589	0.0879		1.4557	1.2022	1.0402	1.1631	0.9257	0.7869	0.7601	0.7582		100	100	100	100	100	100	100	100		pyridoxal	Cofactors, Prosthetic Groups, Electron Carriers	Vitamin B metabolism (B6 or B12)	491
	893	351	31555	Cofactors, Prosthetic Groups, Electron Carriers	Vitamin B metabolism (B6 or B12)	pyridoxate		0.78	1.87	1.05	1.46	1.29	2.03		0.4128	0.1845	0.0298	0.0078	0.7516	0.1369	0.2002	0.0694	0.2753	0.0642	0.0121	0.004		1.6396	1.0679	0.8681	0.6849	0.7689	0.5526	1.2827	1.1196		100	100	100	100	100	100	100	100		pyridoxate	Cofactors, Prosthetic Groups, Electron Carriers	Vitamin B metabolism (B6 or B12)	100001121
	894	352	608	Cofactors, Prosthetic Groups, Electron Carriers	Vitamin B metabolism (B6 or B12)	pyridoxine (Vitamin B6)		1.59	2.79	1.29	1.37	1.06	1.19		0.1652	0.0904	0.0119	0.0042	0.2508	0.0555	0.1696	0.0622	0.8552	0.1545	0.4515	0.0715		0.7486	1.0051	1.2232	0.4251	0.9485	1.095	1.1874	1.2991		100	100	100	100	100	100	100	100		pyridoxine (Vitamin B6)	Cofactors, Prosthetic Groups, Electron Carriers	Vitamin B metabolism (B6 or B12)	936
	1295	56	40479	Hormone metabolism	Auxin metabolism	2-oxindole-3-acetate		0.83	1.05	0.49	0.66	0.41	0.68		0.1102	0.0643	0.5533	0.0852	0.0123	0.0046	0.0551	0.0247	0.0037	0.0022	0.066	0.0153		1.1822	1.323	1.5603	0.94	0.969	0.9422	0.9841	0.643		100	100	100	100	100	100	100	100		2-oxindole-3-acetate	Hormone metabolism	Auxin metabolism	100003109
	1296	228	38116	Hormone metabolism	Auxin metabolism	indole-3-carboxylic acid		1.06	1.52	1.73	1.79	1.79	1.55		0.8411	0.3335	0.0741	0.0167	0.1233	0.0305	0.1075	0.0425	0.1075	0.0305	0.1957	0.0368		1.1709	0.7105	0.6845	0.8131	0.6845	0.7944	1.2354	1.2277		100	25	0	75	0	25	100	100		indole-3-carboxylic acid	Hormone metabolism	Auxin metabolism	100002185
	1290	229	27513	Hormone metabolism	Auxin metabolism	indoleacetate		1.44	1.34	1.27	1	0.82	0.8		0.4088	0.1832	0.4729	0.0759	0.2112	0.0478	0.9959	0.2449	0.2036	0.0503	0.1368	0.0272		0.278	0.8033	1.2499	0.2992	1.0223	1.2719	0.4	1.0223		50	100	100	50	100	100	75	100		indoleacetate	Hormone metabolism	Auxin metabolism	100001034
	1303	239	35659	Hormone metabolism	Jasmonate metabolism	jasmonic acid		1.11	1	1.45	1.3	1.43	1.36		0.8479	0.3345	0.7666	0.1134	0.6415	0.1214	0.7715	0.2014	0.636	0.1238	0.673	0.0982		0.5975	1.3096	1.3223	0.6604	1.458	1.3864	0.6607	1.8924		100	100	100	100	100	100	100	100		jasmonic acid	Hormone metabolism	Jasmonate metabolism	100001643
	759	96	32198	Lipids	Carnitine metabolism	acetylcarnitine		0.77	0.64	0.83	0.81	0.84	0.9		0.3203	0.154	0.055	0.0133	0.5424	0.1066	0.6201	0.1708	0.2389	0.057	0.5757	0.087		1.1636	0.9722	0.9582	1.3939	0.998	0.8975	0.895	0.8065		100	75	100	100	100	100	100	100		acetylcarnitine	Lipids	Carnitine metabolism	100000802
	731	43	42562	Lipids	Choline metabolism	2-dimethylaminoethanol		0.04	0.16	0.05	0.3	0.13	0.98		5.7357e-05	0.0004	0.0006	0.0005	0.0001	0.0002	0.0151	0.0088	6.7146e-05	0.0001	0.391	0.064		3.3161	2.4211	1.0297	0.8103	0.4318	0.1313	0.1288	0.1288		100	100	100	100	100	25	0	25		2-dimethylaminoethanol	Lipids	Choline metabolism	100001630
	727	133	15506	Lipids	Choline metabolism	choline		1.03	1.02	0.95	0.94	1.16	1.2		0.2066	0.1079	0.396	0.0658	0.2679	0.059	0.1327	0.0504	0.0071	0.0036	0.003	0.0014		1.4034	0.9875	0.8084	1.4157	1.0038	0.782	1.4486	0.9416		100	100	100	100	100	100	100	100		choline	Lipids	Choline metabolism	1256
	728	134	34396	Lipids	Choline metabolism	choline phosphate		1.53	0.81	1.57	0.89	1.11	0.74		0.0549	0.0364	0.0963	0.0203	0.0242	0.0081	0.0551	0.0247	0.1153	0.0322	0.0012	0.0007		0.4076	0.7605	1.0799	0.7728	1.3428	1.6214	0.6234	1.1975		100	100	100	100	100	100	100	100		choline phosphate	Lipids	Choline metabolism	267
	729	161	1497	Lipids	Choline metabolism	ethanolamine		0.81	0.85	0.7	0.73	0.84	0.88		0.1552	0.0856	0.1616	0.0312	0.0701	0.0194	0.0345	0.0169	0.3038	0.0698	0.3709	0.0618		1.2152	1.1004	0.9244	1.15	1.0606	0.8766	0.9799	0.7725		100	100	100	100	100	100	100	100		ethanolamine	Lipids	Choline metabolism	420
	756	67	542	Lipids	Cutin and cuticular	3-hydroxybutyrate (BHBA)		0.79	0.95	0.53	0.63	0.58	0.84		0.3001	0.1479	0.4943	0.0786	0.0599	0.0172	0.1203	0.0465	0.1269	0.0347	0.416	0.0668		1.2448	1.4436	1.2999	1.0323	1.2125	0.8994	0.9777	0.7586		100	100	100	100	100	100	100	100		3-hydroxybutyrate (BHBA)	Lipids	Cutin and cuticular	254
	573	323	38102	Lipids	Fatty acid amide	oleic ethanolamide		0.64	0.83	0.52	1.23	0.8	3.33		0.3132	0.1525	0.4513	0.0732	0.0543	0.0162	0.5987	0.167	0.453	0.0943	0.0172	0.0054		1.8412	1.2448	0.8004	1.4042	0.5209	0.1929	1.1719	0.6424		100	100	100	100	100	50	75	100		oleic ethanolamide	Lipids	Fatty acid amide	1137
	795	33	43761	Lipids	Fatty acid, Amino	2-aminoheptanoate		0.55	0.5	1	1.12	1.07	1.46		0.1491	0.0828	0.0171	0.0055	0.9608	0.1682	0.6664	0.181	0.8011	0.1457	0.1277	0.0258		1.5853	0.9748	0.9156	1.7371	0.8714	0.667	0.872	0.9762		100	100	75	100	75	25	75	75		2-aminoheptanoate	Lipids	Fatty acid, Amino	100004542
	814	47	37253	Lipids	Fatty acid, Dicarboxylate	2-hydroxyglutarate		0.8	0.93	0.62	0.89	0.73	1.01		0.047	0.0331	0.4867	0.0777	0.0074	0.003	0.3002	0.095	0.037	0.0132	0.994	0.1358		1.7888	1.1339	0.9577	1.5439	0.7849	0.6941	1.43	0.7003		100	100	100	100	100	100	100	100		2-hydroxyglutarate	Lipids	Fatty acid, Dicarboxylate	100002070
	816	104	21134	Lipids	Fatty acid, Dicarboxylate	adipate		0.75	0.55	0.66	0.54	0.84	0.74		0.0375	0.0277	0.004	0.0019	0.0013	0.0009	0.0004	0.0006	0.0287	0.0108	0.004	0.0017		1.2464	0.98	0.7713	1.6974	1.1962	0.8768	0.9388	0.646		100	100	100	100	100	100	100	100		adipate	Lipids	Fatty acid, Dicarboxylate	100000863
	801	124	18362	Lipids	Fatty acid, Dicarboxylate	azelate (nonanedioate)		0.69	1.15	1.86	2.62	2.43	2.44		0.0444	0.0316	0.4366	0.0712	0.0001	0.0002	2.0577e-05	9.0875e-05	1.7477e-05	5.9688e-05	0.0002	0.0002		1.8539	0.9646	0.7387	1.1066	0.686	0.7361	1.2733	1.7971		100	100	100	100	100	100	100	100		azelate (nonanedioate)	Lipids	Fatty acid, Dicarboxylate	2029
	803	153	32388	Lipids	Fatty acid, Dicarboxylate	dodecanedioate		0.4	0.26	0.19	0.2	0.29	0.37		0.0088	0.0094	0.0019	0.0011	1.304e-05	4.7083e-05	8.7449e-06	7.4742e-05	5.9808e-05	0.0001	0.0002	0.0002		1.1454	1.5819	1.0342	1.7905	1.5078	0.8209	0.4583	0.3026		100	100	100	100	100	100	100	100		dodecanedioate	Lipids	Fatty acid, Dicarboxylate	100001102
	817	162	15765	Lipids	Fatty acid, Dicarboxylate	ethylmalonate		0.39	0.53	0.65	0.79	0.74	0.82		4.5869e-05	0.0003	0.0241	0.0067	0.0127	0.0047	0.2798	0.0901	0.0509	0.0174	0.5347	0.0827		1.6588	1.2904	1.1343	1.2185	1.0653	1.0325	0.6455	0.8441		100	100	100	100	100	100	100	100		ethylmalonate	Lipids	Fatty acid, Dicarboxylate	2054
	813	198	396	Lipids	Fatty acid, Dicarboxylate	glutarate (pentanedioate)		0.95	0.88	0.51	0.57	0.89	0.91		0.6281	0.2641	0.3738	0.0635	7.161e-05	0.0001	0.0001	0.0003	0.0686	0.0215	0.2305	0.0415		1.4406	1.0601	0.6118	1.5439	0.9511	0.5951	1.3635	0.5432		100	100	100	100	100	100	100	100		glutarate (pentanedioate)	Lipids	Fatty acid, Dicarboxylate	339
	804	255	15872	Lipids	Fatty acid, Dicarboxylate	malonate		1.56	1.76	1.03	1.23	1.17	1.13		0.0969	0.0578	0.0461	0.0113	0.8155	0.1457	0.1359	0.0509	0.1512	0.04	0.3298	0.056		0.8685	1.1064	0.9722	0.7709	0.9241	1.0042	1.3539	1.1387		100	100	100	100	100	100	100	100		malonate	Lipids	Fatty acid, Dicarboxylate	818
	805	344	15704	Lipids	Fatty acid, Dicarboxylate	pimelate (heptanedioate)		0.72	0.49	0.84	0.52	1.19	0.77		0.0494	0.0343	0.0011	0.0007	0.3679	0.0776	0.0164	0.0093	0.4731	0.0974	0.1763	0.0337		1.4457	0.7587	0.5381	2.0971	1.2408	0.8352	1.0344	0.6411		100	100	100	100	100	100	100	75		pimelate (heptanedioate)	Lipids	Fatty acid, Dicarboxylate	100000101
	806	371	32398	Lipids	Fatty acid, Dicarboxylate	sebacate (decanedioate)		0.76	0.57	1.04	1.02	1.18	0.95		0.2875	0.144	0.0525	0.0128	0.9794	0.1701	0.8727	0.2218	0.6728	0.128	0.753	0.1076		0.9444	1.0556	0.9299	1.2528	1.0774	1.1603	0.7132	1.0972		100	100	100	100	100	100	100	100		sebacate (decanedioate)	Lipids	Fatty acid, Dicarboxylate	100001211
	807	385	15730	Lipids	Fatty acid, Dicarboxylate	suberate (octanedioate)		0.73	0.48	1.29	1.12	1.22	0.93		0.358	0.1666	0.0324	0.0084	0.2754	0.0603	0.6513	0.1783	0.4011	0.0866	0.7645	0.1085		0.9333	0.5702	0.6036	1.4044	0.6556	0.7875	0.6788	0.7341		75	0	25	100	50	50	25	50		suberate (octanedioate)	Lipids	Fatty acid, Dicarboxylate	100000016
	809	414	42395	Lipids	Fatty acid, Dicarboxylate	undecanedioate		0.58	0.27	0.64	0.66	0.76	0.93		0.3954	0.1797	0.0209	0.0061	0.238	0.053	0.2504	0.0822	0.3474	0.0777	0.5851	0.0876		0.7311	1.2258	1.0307	1.5553	1.1795	0.8388	0.4268	0.7799		100	100	100	100	100	100	100	100		undecanedioate	Lipids	Fatty acid, Dicarboxylate	100001617
	570	46	52281	Lipids	Free fatty acid	2-hydroxybutyrate/2-hydroxyisobutyrate		0.88	0.87	1.02	0.71	0.81	1.02		0.9549	0.3614	0.7388	0.1101	0.391	0.0802	0.417	0.1235	0.4287	0.0915	0.391	0.064		0.8627	0.4459	0.5585	0.8752	0.6351	0.4459	0.763	0.4528		25	0	50	75	25	0	50	25		2-hydroxybutyrate/2-hydroxyisobutyrate	Lipids	Free fatty acid	100008928
	561	48	22036	Lipids	Free fatty acid	2-hydroxyoctanoate		0.82	0.73	1.08	1	0.87	1.21		0.5597	0.2406	0.1025	0.0213	0.8743	0.1551	0.8758	0.2221	0.4112	0.0885	0.5651	0.086		0.9064	0.819	1.0097	1.0113	0.8845	0.7284	0.7407	0.8811		75	75	100	100	75	50	50	50		2-hydroxyoctanoate	Lipids	Free fatty acid	100000743
	484	49	35675	Lipids	Free fatty acid	2-hydroxypalmitate		0.5	0.64	0.68	1.03	1.14	1.62		0.0316	0.0241	0.0312	0.0081	0.0062	0.0027	0.7415	0.196	0.1642	0.0428	0.003	0.0014		2.0755	1.326	0.7888	1.6235	0.8703	0.5546	1.0355	0.9007		100	100	100	100	100	100	100	100		2-hydroxypalmitate	Lipids	Free fatty acid	100001579
	485	50	17945	Lipids	Free fatty acid	2-hydroxystearate		0.42	0.58	0.63	0.94	1.19	1.66		0.0194	0.0172	0.0055	0.0024	0.0552	0.0162	0.6198	0.1708	0.4693	0.0969	0.0553	0.0133		2.512	1.2265	0.6501	1.8324	0.8214	0.4663	1.0651	0.7757		100	100	100	100	100	100	100	100		2-hydroxystearate	Lipids	Free fatty acid	1239
	489	70	22001	Lipids	Free fatty acid	3-hydroxyoctanoate		0.76	0.57	1.15	1.11	1.16	1.42		0.2993	0.1479	0.091	0.0195	0.942	0.1659	0.9397	0.2327	0.9755	0.1717	0.5623	0.0858		1.0026	0.9915	0.9855	1.3546	1.0321	0.8016	0.7667	1.1417		100	100	100	100	100	100	100	100		3-hydroxyoctanoate	Lipids	Free fatty acid	100000773
	492	79	38309	Lipids	Free fatty acid	4-hydroxy-2-nonenal		0.57	0.27	0.91	0.7	0.82	0.81		0.5583	0.2406	0.0076	0.0029	0.6308	0.1204	0.2981	0.0949	0.4238	0.091	0.4124	0.0666		0.8	0.9317	1.0285	1.6852	1.2018	1.0467	0.4565	0.8443		100	100	100	100	100	100	100	100		4-hydroxy-2-nonenal	Lipids	Free fatty acid	143
	496	95	21239	Lipids	Free fatty acid	8-hydroxyoctanoate		0.7	0.48	1.07	1.16	1.17	1.6		0.2146	0.111	0.0184	0.0058	0.8793	0.1556	0.6256	0.1718	0.6053	0.1191	0.1106	0.0232		1.1976	1.0702	0.9799	1.7585	0.9861	0.7161	0.8432	1.1476		100	100	100	100	100	100	100	100		8-hydroxyoctanoate	Lipids	Free fatty acid	100000956
	557	112	37073	Lipids	Free fatty acid	alpha-hydroxycaproate		0.83	0.69	1.4	1.29	1.71	2.01		0.401	0.1802	0.1548	0.0303	0.1747	0.0408	0.2854	0.0915	0.0475	0.0165	0.02	0.006		1.0363	1.0325	0.8433	1.2584	1.1188	0.7202	0.8646	1.445		100	100	100	100	100	100	75	100		alpha-hydroxycaproate	Lipids	Free fatty acid	100001723
	498	120	1118	Lipids	Free fatty acid	arachidate (20:0)		0.49	0.57	0.58	0.94	0.93	1.52		0.0159	0.0151	0.0363	0.0092	0.0145	0.0052	0.6972	0.187	0.6484	0.1252	0.0661	0.0153		1.5974	1.5215	0.9532	1.3698	0.9473	0.5842	0.7763	0.8884		100	100	100	100	100	100	100	100		arachidate (20:0)	Lipids	Free fatty acid	893
	503	130	32489	Lipids	Free fatty acid	caproate (6:0)		1.39	1.25	1.7	2.25	1.89	3.01		0.3014	0.1481	0.5124	0.0801	0.1598	0.0386	0.0527	0.024	0.101	0.0293	0.0175	0.0054		0.9898	1.117	1.0004	1.1007	0.8419	0.6285	1.3802	1.8935		100	100	100	100	100	100	100	100		caproate (6:0)	Lipids	Free fatty acid	926
	504	131	32492	Lipids	Free fatty acid	caprylate (8:0)		2.26	1.63	1.48	1.66	0.75	1.98		0.2362	0.1214	0.5642	0.0866	0.3827	0.08	0.2534	0.0828	0.727	0.1352	0.1287	0.0259		1.0163	0.5904	1.1621	1.4057	0.5263	0.4415	2.2958	0.8749		100	75	25	100	100	25	100	75		caprylate (8:0)	Lipids	Free fatty acid	932
	514	155	33587	Lipids	Free fatty acid	eicosenoate (20:1)		0.34	0.31	0.46	0.79	0.86	1.46		0.0101	0.0105	0.0002	0.0002	0.001	0.0008	0.077	0.032	0.2484	0.0588	0.0996	0.0212		2.0094	1.8811	1.001	2.248	1.0868	0.5909	0.6865	0.8614		100	100	100	100	100	100	100	100		eicosenoate (20:1)	Lipids	Free fatty acid	100001335
	519	219	1644	Lipids	Free fatty acid	heptanoate (7:0)		0.44	0.22	0.69	0.5	0.59	0.77		0.0692	0.044	0.005	0.0022	0.3045	0.0654	0.1223	0.0471	0.1799	0.046	0.3541	0.0595		0.7778	0.9558	1.1147	1.5313	1.3066	0.8607	0.3395	0.6585		100	100	100	100	100	100	100	100		heptanoate (7:0)	Lipids	Free fatty acid	925
	524	248	1364	Lipids	Free fatty acid	lignocerate (24:0)		1.08	0.86	0.76	0.86	0.93	0.96		0.5575	0.2406	0.4473	0.0727	0.0644	0.0182	0.3379	0.1047	0.6333	0.1236	0.8146	0.114		0.8968	1.2668	1.0234	1.1179	1.1188	1.0003	0.9665	0.9568		100	100	100	100	100	100	100	100		lignocerate (24:0)	Lipids	Free fatty acid	516
	526	249	1105	Lipids	Free fatty acid	linoleate (18:2n6)		0.96	2	0.34	1.44	1.41	3.91		0.9923	0.3703	0.1138	0.0231	0.0381	0.0122	0.8428	0.2153	0.8759	0.1574	0.0606	0.0143		2.6454	1.3983	0.3337	1.276	0.3249	0.12	2.5495	0.4692		100	100	100	100	100	100	100	100		linoleate (18:2n6)	Lipids	Free fatty acid	180
	527	250	34035	Lipids	Free fatty acid	linolenate [alpha or gamma; (18:3n3 or 6)]		0.9	2.84	0.23	1.41	1.36	3.78		0.9305	0.3558	0.0692	0.0158	0.0228	0.0078	0.9791	0.2415	0.9359	0.1666	0.1144	0.0239		6.0453	1.6218	0.2803	1.9066	0.2704	0.1007	5.4197	0.3808		100	100	100	100	100	100	100	100		linolenate [alpha or gamma; (18:3n3 or 6)]	Lipids	Free fatty acid	100001337
	536	322	1359	Lipids	Free fatty acid	oleate (18:1n9)		0.59	0.55	0.38	0.51	0.6	0.81		0.0002	0.0008	0.0001	0.0002	0.0002	0.0003	0.0016	0.0017	0.0014	0.0011	0.0903	0.0196		1.6258	1.353	0.8733	1.738	1.0144	0.645	0.9612	0.5198		100	100	100	100	100	100	100	100		oleate (18:1n9)	Lipids	Free fatty acid	442
	538	331	1336	Lipids	Free fatty acid	palmitate (16:0)		0.7	0.8	0.88	1.43	1.26	1.85		0.044	0.0316	0.0744	0.0167	0.2396	0.0532	0.0264	0.0136	0.1057	0.0303	0.0073	0.0027		1.3151	1.2157	0.8476	1.1365	0.745	0.5774	0.9141	1.0661		100	100	100	100	100	100	100	100		palmitate (16:0)	Lipids	Free fatty acid	424
	606	5	27447	Lipids	Glycerolipids	1-linoleoylglycerol (18:2)		0.24	0.47	1.59	1.72	4.05	5.79		0.0659	0.0422	0.1629	0.0312	0.5956	0.1155	0.5566	0.1565	0.1077	0.0305	0.0515	0.0126		4.0014	1.196	0.4699	2.0506	1.1073	0.3286	0.956	1.9036		100	75	75	100	100	100	100	100		1-linoleoylglycerol (18:2)	Lipids	Glycerolipids	100001040
	633	9	34391	Lipids	Glycerolipids	1-margaroylglycerol (17:0)		0.57	0.42	1.23	1.94	1.36	1.71		0.3202	0.154	0.0807	0.0178	0.618	0.1186	0.1022	0.0407	0.4462	0.0935	0.1811	0.0345		2.3386	0.9463	0.8583	3.1644	0.6015	0.6815	1.3252	1.1668		100	100	100	100	100	100	100	100		1-margaroylglycerol (17:0)	Lipids	Glycerolipids	100001429
	608	12	21184	Lipids	Glycerolipids	1-oleoylglycerol (18:1)		0.47	0.43	0.6	0.76	1.38	1.75		0.0587	0.0382	0.0148	0.005	0.0698	0.0194	0.2858	0.0915	0.3179	0.0728	0.099	0.0211		4.2971	1.0919	0.4705	4.7119	0.8604	0.3719	2.0188	0.6498		100	100	100	100	100	100	100	100		1-oleoylglycerol (18:1)	Lipids	Glycerolipids	100000924
	628	16	45968	Lipids	Glycerolipids	1-oleoyl-GPG (18:1)*		0.34	0.34	1	1	1	1		0.022	0.0186	0.0122	0.0043										1.0827	0.2553	0.2553	1.0665	0.2553	0.2553	0.3675	0.2553		100	25	0	100	0	0	25	0		1-oleoyl-GPG (18:1)*	Lipids	Glycerolipids	100005716
	609	24	21127	Lipids	Glycerolipids	1-palmitoylglycerol (16:0)		0.48	0.38	0.91	1.08	1.46	1.12		0.0505	0.0347	0.0166	0.0054	0.5751	0.1121	0.8569	0.2183	0.1295	0.0351	0.6732	0.0982		2.4214	1.0606	0.6621	3.0381	0.8957	0.8647	1.1683	0.9668		100	100	100	100	100	100	100	100		1-palmitoylglycerol (16:0)	Lipids	Glycerolipids	100000827
	614	52	32506	Lipids	Glycerolipids	2-linoleoylglycerol (18:2)		0.35	1.24	1.99	2.21	4.74	6.53		0.1102	0.0643	0.3429	0.0592	0.4025	0.0823	0.3271	0.102	0.0745	0.023	0.0469	0.0119		3.5381	0.9826	0.4132	0.9932	0.887	0.3	1.2308	1.9578		100	75	75	50	75	50	100	100		2-linoleoylglycerol (18:2)	Lipids	Glycerolipids	100000987
	617	57	33419	Lipids	Glycerolipids	2-palmitoylglycerol (16:0)		0.44	0.38	0.88	0.94	1.09	1.04		0.0323	0.0244	0.0224	0.0064	0.5081	0.1003	0.7905	0.2054	0.6014	0.1186	0.7545	0.1076		2.6409	0.903	0.7261	3.073	0.8478	0.7622	1.1701	0.7939		100	100	100	100	100	100	100	100		2-palmitoylglycerol (16:0)	Lipids	Glycerolipids	100001048
	627	202	15122	Lipids	Glycerolipids	glycerol		1.19	1.3	0.84	1.13	1.1	1.58		0.0538	0.0362	0.0288	0.0076	0.0891	0.0236	0.1138	0.0443	0.1415	0.0377	0.0005	0.0004		1.3275	1.1656	0.8919	1.2171	0.8636	0.6188	1.582	0.9793		100	100	100	100	100	100	100	100		glycerol	Lipids	Glycerolipids	1254
	632	205	48857	Lipids	Glycerolipids	glycerophosphoglycerol		26.69	28.09	7.62	8.53	5.05	8.18		4.4517e-05	0.0003	8.6354e-07	8.7508e-06	9.1465e-05	0.0002	4.9282e-05	0.0002	7.2841e-05	0.0001	2.4031e-07	3.5965e-06		0.309	0.9674	1.4597	0.2937	0.864	0.9008	8.2487	7.3704		100	100	100	100	100	100	100	100		glycerophosphoglycerol	Lipids	Glycerolipids	100001619
	581	3	37752	Lipids	Oxylipins	13-HODE + 9-HODE		0.69	0.39	0.67	0.77	1.18	1.3		0.1813	0.0981	0.0033	0.0017	0.0005	0.0005	0.0029	0.0026	0.0984	0.0291	0.0032	0.0014		1.4836	1.1933	0.6778	2.5868	1.0408	0.6146	1.0168	0.7965		100	100	100	100	100	100	100	100		13-HODE + 9-HODE	Lipids	Oxylipins	100002196
	636	6	34419	Lipids	Phospholipids	1-linoleoyl-GPC (18:2)		0.76	1.1	0.75	4.18	8.27	9.7		0.9012	0.3495	0.5029	0.0792	0.3103	0.0663	0.3002	0.095	0.1317	0.0353	0.1115	0.0233		1.9829	0.5734	0.0523	1.3589	0.1034	0.0446	1.4974	0.4324		100	100	50	100	75	0	100	75		1-linoleoyl-GPC (18:2)	Lipids	Phospholipids	100001395
	637	7	32635	Lipids	Phospholipids	1-linoleoyl-GPE (18:2)*		0.59	1.06	0.42	1.61	2.88	10.65		0.5978	0.2542	0.7843	0.1155	0.1107	0.0279	0.8176	0.2109	0.4996	0.102	0.0465	0.0118		6.4072	1.5273	0.2242	3.5733	0.4005	0.0607	3.8009	0.6462		100	100	100	100	100	75	100	100		1-linoleoyl-GPE (18:2)*	Lipids	Phospholipids	100001570
	638	8	36594	Lipids	Phospholipids	1-linoleoyl-GPI (18:2)*		0.19	0.32	0.69	1.78	1.78	3.77		0.0071	0.008	0.0187	0.0059	0.7885	0.1422	0.3369	0.1047	0.3272	0.0747	0.0342	0.0094		5.0626	1.6537	0.6449	3.0574	0.6459	0.3041	0.9633	1.1479		100	75	100	100	75	100	100	100		1-linoleoyl-GPI (18:2)*	Lipids	Phospholipids	100001778
	723	11	52451	Lipids	Phospholipids	1-oleoyl-2-linoleoyl-GPI (18:1/18:2)*		0.45	0.49	0.16	0.28	0.55	0.81		0.0008	0.0017	0.0005	0.0005	0.0026	0.0015	0.0107	0.0068	0.3414	0.0772	0.3667	0.0614		2.4201	1.5468	0.4596	2.2215	0.894	0.3109	1.0953	0.2518		100	100	100	100	100	100	100	100		1-oleoyl-2-linoleoyl-GPI (18:1/18:2)*	Lipids	Phospholipids	100008979
	703	13	36812	Lipids	Phospholipids	1-oleoyl-GPA (18:1)		0.27	0.37	0.39	0.66	0.76	1.29		0.0101	0.0105	0.0258	0.007	0.0001	0.0002	0.2015	0.0696	0.3475	0.0777	0.2508	0.0441		2.6676	1.886	0.9771	1.9382	1.1311	0.5733	0.7186	0.7417		100	100	100	100	100	100	100	100		1-oleoyl-GPA (18:1)	Lipids	Phospholipids	100001671
	641	14	48258	Lipids	Phospholipids	1-oleoyl-GPC (18:1)		0.8	0.76	0.32	1.12	1.04	4.44		0.6711	0.2787	0.084	0.0183	0.0526	0.0159	0.8255	0.2124	0.742	0.1373	0.0663	0.0153		1.7339	0.7883	0.2461	1.8278	0.2268	0.0575	1.3882	0.2551		100	100	50	100	75	25	100	75		1-oleoyl-GPC (18:1)	Lipids	Phospholipids	100001272
	642	15	35628	Lipids	Phospholipids	1-oleoyl-GPE (18:1)		0.48	0.65	0.27	0.58	0.51	1.03		0.0285	0.0223	0.0005	0.0004	0.0024	0.0014	0.1567	0.0583	0.1084	0.0306	0.2487	0.0441		2.5637	0.6892	0.3671	1.8858	0.325	0.1818	1.221	0.1878		100	100	75	100	100	0	100	50		1-oleoyl-GPE (18:1)	Lipids	Phospholipids	100001569
	643	17	36602	Lipids	Phospholipids	1-oleoyl-GPI (18:1)*		0.17	0.25	0.29	1.78	0.61	1.78		0.0047	0.006	0.0117	0.0042	0.014	0.0051	0.1827	0.065	0.5701	0.113	0.1827	0.0347		2.6784	0.8646	0.4109	1.8538	0.1401	0.1401	0.4648	0.2487		100	100	50	100	0	0	100	75		1-oleoyl-GPI (18:1)*	Lipids	Phospholipids	100001777
	724	18	52459	Lipids	Phospholipids	1-palmitoyl-2-arachidonoyl-GPC (16:0/20:4)*		2.81	4.8	1.16	2.06	2.06	2.06		0.0567	0.0372	0.0042	0.0019	0.9495	0.1668	0.3541	0.1085	0.3541	0.0787	0.3541	0.0595		1.1648	0.6914	0.3884	0.681	0.3884	0.3884	3.2713	0.8019		75	50	0	75	0	0	100	75		1-palmitoyl-2-arachidonoyl-GPC (16:0/20:4)*	Lipids	Phospholipids	100008914
	720	19	52460	Lipids	Phospholipids	1-palmitoyl-2-linoleoyl-GPC (16:0/18:2)*		2.52	2.26	0.86	3.55	3.29	4.7		0.0143	0.0137	0.0227	0.0064	0.6868	0.1269	0.0602	0.0266	0.0763	0.0233	0.0375	0.01		1.6891	1.4107	0.3671	1.8796	0.3401	0.257	4.249	1.2089		100	100	75	100	100	50	100	100		1-palmitoyl-2-linoleoyl-GPC (16:0/18:2)*	Lipids	Phospholipids	1537
	721	20	42449	Lipids	Phospholipids	1-palmitoyl-2-linoleoyl-GPE (16:0/18:2)		1.31	1.23	0.58	0.98	1.17	1.27		0.3556	0.1662	0.4995	0.0789	0.1568	0.0384	0.6005	0.1671	0.9781	0.1717	0.803	0.1126		1.6621	1.348	0.6735	1.7775	0.7993	0.6184	2.1839	0.7873		100	100	100	100	100	100	100	100		1-palmitoyl-2-linoleoyl-GPE (16:0/18:2)	Lipids	Phospholipids	100001870
	722	21	52450	Lipids	Phospholipids	1-palmitoyl-2-linoleoyl-GPI (16:0/18:2)*		0.78	0.82	0.54	0.64	0.91	0.97		0.0571	0.0373	0.1191	0.0241	0.0249	0.0083	0.0583	0.0259	0.745	0.1375	0.6727	0.0982		1.4717	1.1167	0.6623	1.3912	0.9381	0.6239	1.1463	0.6028		100	100	100	100	100	100	100	100		1-palmitoyl-2-linoleoyl-GPI (16:0/18:2)*	Lipids	Phospholipids	1528
	726	22	52461	Lipids	Phospholipids	1-palmitoyl-2-oleoyl-GPC (16:0/18:1)*		2.71	2.46	0.77	3.57	3.09	3.57		0.0179	0.0164	0.015	0.0051	0.8511	0.1513	0.0123	0.0075	0.0093	0.0044	0.0123	0.004		0.8208	0.7617	0.1892	0.9041	0.1639	0.1639	2.2253	0.585		100	75	25	100	0	25	100	100		1-palmitoyl-2-oleoyl-GPC (16:0/18:1)*	Lipids	Choline metabolism	1539
	725	23	19263	Lipids	Phospholipids	1-palmitoyl-2-oleoyl-GPE (16:0/18:1)		0.37	0.35	0.43	0.97	1.04	1.39		0.0244	0.0199	0.019	0.0059	0.0426	0.0133	0.8097	0.2098	0.7129	0.1336	0.6078	0.09		1.3796	1.2466	0.5145	1.4904	0.5493	0.3842	0.5149	0.5355		100	100	100	100	75	50	25	25		1-palmitoyl-2-oleoyl-GPE (16:0/18:1)	Lipids	Phospholipids	1526
	645	25	34428	Lipids	Phospholipids	1-palmitoyl-GPA (16:0)		0.67	0.62	1.66	1.37	1.2	1.87		0.1847	0.099	0.1023	0.0213	0.0391	0.0124	0.1755	0.0633	0.4271	0.0914	0.0278	0.008		1.1762	0.8173	1.1242	1.2724	0.9858	0.7259	0.7874	1.3539		100	100	100	100	100	100	100	100		1-palmitoyl-GPA (16:0)	Lipids	Phospholipids	100001445
	646	26	33955	Lipids	Phospholipids	1-palmitoyl-GPC (16:0)		0.97	0.76	2.24	1.7	2.67	4.54		0.4139	0.1845	0.424	0.0697	0.0295	0.0097	0.1714	0.0622	0.0287	0.0108	0.0039	0.0017		1.9073	0.7986	0.6718	2.4429	1.0565	0.3948	1.8582	1.7913		100	100	100	100	100	100	100	100		1-palmitoyl-GPC (16:0)	Lipids	Phospholipids	100001263
	647	27	35631	Lipids	Phospholipids	1-palmitoyl-GPE (16:0)		1.03	0.96	1.4	1.64	1.88	2.94		0.7095	0.2916	0.52	0.0809	0.2128	0.048	0.105	0.0417	0.0763	0.0233	0.0046	0.0019		2.5682	0.8228	0.6131	2.7557	0.7056	0.3926	2.6441	1.1547		100	100	100	100	100	100	100	100		1-palmitoyl-GPE (16:0)	Lipids	Phospholipids	100001567
	688	28	45970	Lipids	Phospholipids	1-palmitoyl-GPG (16:0)*		0.63	0.63	1.41	2.19	2.7	5.39		0.1544	0.0854	0.0902	0.0194	0.0937	0.0241	0.0066	0.0045	0.0065	0.0034	0.0002	0.0002		2.9328	0.9162	0.4772	2.9217	0.5891	0.2395	1.8551	1.2899		100	100	100	100	100	100	100	100		1-palmitoyl-GPG (16:0)*	Lipids	Phospholipids	100005717
	648	29	35305	Lipids	Phospholipids	1-palmitoyl-GPI (16:0)*		0.91	0.98	2.6	2.62	2.44	3.56		0.6698	0.2787	0.69	0.1041	0.0067	0.0028	0.0059	0.0042	0.0129	0.0057	0.003	0.0014		1.5541	0.7805	0.8307	1.4434	0.7751	0.5691	1.4147	2.0274		100	100	100	100	100	100	100	100		1-palmitoyl-GPI (16:0)*	Lipids	Phospholipids	100001655
	660	203	43847	Lipids	Phospholipids	glycerol 3-phosphate		6.12	6.87	1.88	2.43	1.96	2.94		0.0002	0.0008	3.5926e-08	1.5296e-06	0.0006	0.0005	5.4051e-05	0.0002	0.0002	0.0003	2.1615e-05	4.4273e-05		1.0388	1.1238	1.0827	0.9251	0.8704	0.7206	6.3562	2.1182		100	100	100	100	100	100	100	100		glycerol 3-phosphate	Lipids	Phospholipids	100000258
	661	204	37455	Lipids	Phospholipids	glycerophosphoethanolamine		29.04	34.8	13.25	18.23	7.38	10.21		8.4324e-05	0.0005	6.679e-06	3.2161e-05	3.6862e-05	9.8182e-05	2.031e-05	9.0875e-05	0.0008	0.0006	2.296e-07	3.5965e-06		0.451	0.9225	1.6573	0.3764	0.6709	1.1982	13.099	12.2277		100	100	100	100	100	100	100	100		glycerophosphoethanolamine	Lipids	Phospholipids	100001620
	705	206	47155	Lipids	Phospholipids	glycerophosphoinositol*		6.08	7.15	3.55	3.99	3.09	4.74		3.0093e-05	0.0003	4.0102e-05	9.7531e-05	0.0001	0.0002	5.167e-05	0.0002	0.0002	0.0003	2.8291e-05	4.8773e-05		0.7398	1.1224	1.2902	0.6293	0.9997	0.841	4.5001	3.9868		100	100	100	100	100	100	100	100		glycerophosphoinositol*	Lipids	Phospholipids	100001621
	662	207	15990	Lipids	Phospholipids	glycerophosphorylcholine (GPC)		237	439.83	301.06	698.94	94.85	274.26		2.2243e-05	0.0003	5.0735e-08	1.5296e-06	3.8968e-05	9.8182e-05	1.0249e-05	7.4742e-05	0.0027	0.0017	7.7872e-05	0.0001		0.8561	0.6345	2.014	0.4613	0.2733	0.6965	202.893	191.02		100	100	100	100	0	75	100	100		glycerophosphorylcholine (GPC)	Lipids	Phospholipids	100000269
	669	340	1600	Lipids	Phospholipids	phosphoethanolamine		9.59	3.38	3.6	2.15	2.64	2.27		5.0502e-07	4.403e-05	7.0317e-05	0.0001	0.0003	0.0004	0.0002	0.0004	1.8985e-06	1.7831e-05	4.5246e-06	2.2101e-05		0.2191	0.6792	0.9266	0.6223	1.1356	1.0758	2.1018	2.4447		50	100	100	100	100	100	100	100		phosphoethanolamine	Lipids	Phospholipids	1026
	736	343	1510	Lipids	Sphingolipid	phytosphingosine		0.51	0.63	0.76	0.51	0.54	0.7		0.1131	0.0653	0.2522	0.0452	0.5578	0.1093	0.2156	0.0732	0.0864	0.0262	0.1198	0.0246		0.8355	1.2683	1.7831	0.6777	1.9046	1.3815	0.4296	0.9664		100	100	100	100	100	100	100	100		phytosphingosine	Lipids	Sphingolipid	469
	737	381	17769	Lipids	Sphingolipid	sphinganine		0.17	0.19	0.11	0.08	0.09	0.17		0.005	0.0062	0.0058	0.0024	0.0015	0.001	0.0052	0.0039	0.0015	0.0011	0.0005	0.0004		1.1846	1.7027	2.0346	1.0791	2.1699	1.0777	0.2058	0.1788		100	100	100	100	100	100	100	100		sphinganine	Lipids	Sphingolipid	313
	738	382	17747	Lipids	Sphingolipid	sphingosine		0.1	0.12	0.41	0.17	1.21	0.56		0.0004	0.0012	0.0709	0.016	0.2712	0.0595	0.2254	0.0754	0.391	0.0852	0.5772	0.087		1.4289	0.4244	0.1428	1.2287	0.9971	0.3089	0.1428	0.1729		100	50	0	75	75	25	0	25		sphingosine	Lipids	Sphingolipid	297
	740	66	531	Lipids	Sterols	3-hydroxy-3-methylglutarate		0.53	0.6	0.52	0.52	0.6	0.55		0.0012	0.0022	0.0036	0.0018	0.0017	0.0011	0.0017	0.0017	0.0036	0.0021	0.0032	0.0014		1.2971	1.0679	0.9371	1.1413	1.0846	1.0182	0.6889	0.5596		100	100	100	100	100	100	100	100		3-hydroxy-3-methylglutarate	Lipids	Sterols	112
	741	128	27414	Lipids	Sterols	beta-sitosterol		0.92	1.05	1.03	1.28	1.2	1.51		0.4232	0.1881	0.7317	0.1093	0.5805	0.1129	0.0025	0.0023	0.0075	0.0037	0.0001	0.0001		1.4546	0.9858	0.8422	1.2683	0.7922	0.6686	1.3319	1.0128		100	100	100	100	100	100	100	100		beta-sitosterol	Lipids	Sterols	100001033
	744	129	33997	Lipids	Sterols	campesterol		0.58	0.56	0.46	0.53	0.59	0.7		0.0013	0.0023	5.3088e-05	0.0001	2.3657e-05	7.6983e-05	0.0001	0.0002	0.0003	0.0003	0.0017	0.0009		1.2965	1.24	0.9531	1.3305	1.0567	0.8019	0.7473	0.5649		100	100	100	100	100	100	100	100		campesterol	Lipids	Sterols	100001269
	748	156	27553	Lipids	Sterols	ergosterol		1.19	1.19	1.29	1.29	1.29	1.29		0.1817	0.0981	0.1817	0.0342	0.0911	0.0238	0.0911	0.0372	0.0911	0.0274	0.0911	0.0197		0.7525	0.7525	0.7525	0.7525	0.7525	0.7525	0.8976	0.9698		0	0	0	0	0	0	75	75		ergosterol	Lipids	Sterols	100001020
	752	168	21187	Lipids	Sterols	fucosterol		0.57	0.42	0.32	0.27	0.39	0.36		0.0011	0.0021	8.3591e-06	3.3265e-05	0.0002	0.0003	7.7302e-05	0.0002	0.0005	0.0005	0.0005	0.0004		1.3424	1.0742	0.8852	1.8178	1.2695	0.9529	0.7681	0.3459		100	100	100	100	100	100	100	100		fucosterol	Lipids	Sterols	100000930
	753	384	21183	Lipids	Sterols	stigmasterol		0.41	0.47	0.39	0.5	0.46	0.57		0.0001	0.0005	3.2782e-05	8.6662e-05	1.5151e-06	1.4175e-05	9.8662e-06	7.4742e-05	5.8118e-05	0.0001	0.0003	0.0003		1.2204	1.207	1.0292	1.0629	0.936	0.8196	0.4966	0.4686		100	100	100	100	100	100	100	100		stigmasterol	Lipids	Sterols	100000923
	907	34	1553	Nucleotide	Purine metabolism	2'-deoxyadenosine		0.64	0.64	0.76	0.89	1.38	1.12		0.0006	0.0014	0.0006	0.0005	0.0998	0.0254	0.2125	0.0726	0.0086	0.0041	0.2187	0.0398		3.4265	1.0856	0.5962	3.4211	0.9295	0.7376	2.1932	0.8257		100	100	100	100	100	100	100	100		2'-deoxyadenosine	Nucleotide	Purine metabolism	211
	949	35	40663	Nucleotide	Purine metabolism	2'-deoxyadenosine 3'-monophosphate		0.51	0.38	0.85	0.59	1.63	2.66		0.0203	0.0178	0.0056	0.0024	0.4305	0.0876	0.0516	0.0236	0.0157	0.0065	0.0695	0.0159		2.782	0.9657	0.507	3.7191	1.3966	0.3103	1.4093	0.8246		100	100	100	100	100	100	100	100		2'-deoxyadenosine 3'-monophosphate	Nucleotide	Purine metabolism	100003420
	957	36	46333	Nucleotide	Purine metabolism	2'-deoxyadenosine 5'-monophosphate		0.77	0.77	0.48	0.74	0.79	12.48		0.1356	0.0763	0.0964	0.0203	3.479e-06	2.003e-05	0.0805	0.0333	0.0041	0.0024	0.0071	0.0026		1.3547	1.4955	0.9014	1.3518	0.9555	0.057	1.0449	0.7116		100	100	100	100	100	100	100	100		2'-deoxyadenosine 5'-monophosphate	Nucleotide	Purine metabolism	100000485
	908	39	1411	Nucleotide	Purine metabolism	2'-deoxyguanosine		0.58	0.63	0.59	0.7	1.08	0.9		0.0005	0.0012	0.0009	0.0007	0.0054	0.0024	0.0146	0.0085	0.5103	0.1039	0.3077	0.0529		2.4627	1.1204	0.6127	2.2909	0.9413	0.7356	1.4383	0.6628		100	100	100	100	100	100	100	100		2'-deoxyguanosine	Nucleotide	Purine metabolism	348
	959	40	41916	Nucleotide	Purine metabolism	2'-deoxyguanosine 3'-monophosphate		0.5	0.39	0.39	0.89	0.92	1.54		0.0437	0.0316	0.0214	0.0062	0.0047	0.0022	0.7298	0.1939	0.8459	0.1532	0.0826	0.0184		2.3964	1.2458	0.5368	3.0417	0.5496	0.3198	1.1888	0.4915		100	100	75	100	75	0	100	100		2'-deoxyguanosine 3'-monophosphate	Nucleotide	Purine metabolism	100003423
	909	41	35662	Nucleotide	Purine metabolism	2'-deoxyguanosine 5'-monophosphate (dGMP)		0.96	0.97	0.57	0.76	0.95	10.59		0.7742	0.3109	0.7528	0.1116	0.0001	0.0002	0.0094	0.0062	0.3499	0.078	0.0122	0.004		1.2184	1.2314	0.7459	1.2057	0.934	0.0668	1.1751	0.7074		100	100	100	100	100	100	100	100		2'-deoxyguanosine 5'-monophosphate (dGMP)	Nucleotide	Purine metabolism	100001546
	910	42	15076	Nucleotide	Purine metabolism	2'-deoxyinosine		0.94	1.64	1.04	1.04	1.04	1.04		0.9573	0.3614	0.1478	0.0292	0.391	0.0802	0.391	0.1167	0.391	0.0852	0.391	0.064		1.0768	0.6162	0.6162	0.6162	0.6162	0.6162	1.0128	0.6431		50	0	0	0	0	0	100	25		2'-deoxyinosine	Nucleotide	Purine metabolism	100000135
	953	55	42607	Nucleotide	Purine metabolism	2'-O-methyladenosine		0.59	0.67	0.91	0.84	0.63	0.3		0.0279	0.0222	0.0857	0.0186	0.4829	0.0964	0.3671	0.1109	0.0636	0.0205	0.0026	0.0013		1.6402	0.6924	1.005	1.4438	0.7538	2.1044	0.9637	0.6308		100	100	100	100	100	100	100	100		2'-O-methyladenosine	Nucleotide	Purine metabolism	100004047
	913	94	31580	Nucleotide	Purine metabolism	7-methylguanosine		1.55	1.22	1.11	1.38	1.53	1.33		0.1128	0.0653	0.4548	0.0735	0.3744	0.0785	0.0251	0.0132	0.0065	0.0034	0.055	0.0133		0.8201	1.1296	0.8195	1.0367	0.9098	0.9445	1.2673	1.2548		100	100	100	100	100	100	100	100		7-methylguanosine	Nucleotide	Purine metabolism	100001118
	915	98	554	Nucleotide	Purine metabolism	adenine		0.74	1.03	0.76	1.06	1.15	1		0.0444	0.0316	0.9024	0.13	0.0869	0.0231	0.7446	0.1963	0.3765	0.083	0.9419	0.1302		2.5016	1.0825	0.7183	1.8026	0.7802	0.8244	1.8493	0.8278		100	100	100	100	100	100	100	100		adenine	Nucleotide	Purine metabolism	880
	916	99	555	Nucleotide	Purine metabolism	adenosine		0.59	0.62	0.6	0.66	0.73	0.72		0.0007	0.0017	0.0002	0.0002	0.0003	0.0003	0.0017	0.0017	0.0051	0.0028	0.0058	0.0022		1.3728	1.1741	0.9655	1.3201	1.067	0.9728	0.816	0.7049		100	100	100	100	100	100	100	100		adenosine	Nucleotide	Purine metabolism	798
	917	100	36815	Nucleotide	Purine metabolism	adenosine 2'-monophosphate (2'-AMP)		1	0.68	0.53	0.57	0.55	0.47		0.9225	0.3543	0.0011	0.0007	6.886e-06	3.0317e-05	1.5046e-05	7.9736e-05	2.3888e-05	7.8039e-05	0.0074	0.0027		0.9024	1.0533	1.0233	1.3312	0.985	1.2018	0.9045	0.5632		100	100	100	100	100	100	100	100		adenosine 2'-monophosphate (2'-AMP)	Nucleotide	Purine metabolism	100001694
	919	101	35142	Nucleotide	Purine metabolism	adenosine 3'-monophosphate (3'-AMP)		0.55	0.17	0.89	0.84	0.49	0.76		0.0185	0.0166	4.592e-06	2.7921e-05	0.654	0.122	0.2049	0.0705	0.0038	0.0023	0.0836	0.0184		0.8864	0.9393	1.6822	2.7994	0.989	1.0985	0.4885	0.8323		100	100	100	100	100	100	50	100		adenosine 3'-monophosphate (3'-AMP)	Nucleotide	Purine metabolism	100001449
	921	102	32342	Nucleotide	Purine metabolism	adenosine 5'-monophosphate (AMP)		1.05	1.32	0.46	0.72	0.51	11.1		0.5721	0.2453	0.0085	0.0032	0.0005	0.0005	0.0326	0.0162	0.0004	0.0004	0.0052	0.0021		0.9794	1.8949	1.7131	0.7833	1.2271	0.0793	1.0332	0.88		100	100	100	100	100	100	100	100		adenosine 5'-monophosphate (AMP)	Nucleotide	Purine metabolism	209
	922	103	37467	Nucleotide	Purine metabolism	adenosine-2',3'-cyclic monophosphate		0.86	0.3	0.62	0.41	0.29	0.18		0.5768	0.2466	0.0002	0.0002	0.0189	0.0066	1.3295e-05	7.9736e-05	1.6121e-05	5.7681e-05	1.0474e-05	2.9235e-05		0.3778	1.0468	2.2442	1.0893	1.5873	3.7015	0.3231	0.6498		100	100	100	100	100	100	100	100		adenosine-2',3'-cyclic monophosphate	Nucleotide	Purine metabolism	72
	925	108	33434	Nucleotide	Purine metabolism	allantoic acid		0.61	0.38	0.16	0.17	0.17	0.22		0.0079	0.0086	0.0003	0.0003	8.7196e-05	0.0002	0.0001	0.0002	0.0002	0.0002	0.001	0.0007		0.4181	1.5899	1.5441	0.6694	1.5762	1.1855	0.2551	0.2614		100	100	100	100	100	100	100	100		allantoic acid	Nucleotide	Purine metabolism	218
	926	109	1107	Nucleotide	Purine metabolism	allantoin		3.38	2.7	2.11	1.64	1.2	1.14		0.0001	0.0005	0.0012	0.0008	0.0021	0.0013	1.439e-05	7.9736e-05	0.001	0.0008	0.082	0.0183		0.1789	0.8472	1.4843	0.2238	1.0875	1.5712	0.6052	1.7856		100	100	100	100	100	100	100	100		allantoin	Nucleotide	Purine metabolism	1002
	927	212	32352	Nucleotide	Purine metabolism	guanine		1.29	2.09	1.49	1.94	2.87	2.82		0.5849	0.2494	0.0954	0.0203	0.8306	0.148	0.5028	0.144	0.1855	0.0468	0.1965	0.0368		2.1782	0.8551	0.4451	1.3426	0.6586	0.4533	2.8111	1.2761		100	100	100	100	100	75	100	100		guanine	Nucleotide	Purine metabolism	172
	928	213	1573	Nucleotide	Purine metabolism	guanosine		0.64	0.6	0.71	0.85	0.85	1.04		0.004	0.0056	3.4612e-06	2.3383e-05	0.0049	0.0022	0.0691	0.0295	0.0566	0.0189	0.6408	0.0946		1.1727	1.2001	1.0104	1.2648	1.0048	0.8225	0.7552	0.8555		100	100	100	100	100	100	100	100		guanosine	Nucleotide	Purine metabolism	1099
	960	214	52442	Nucleotide	Purine metabolism	guanosine 2'-monophosphate (2'-GMP)*		1.94	0.85	0.77	0.73	0.69	0.75		0.0157	0.0149	0.2039	0.0376	0.0018	0.0011	0.0036	0.003	0.0003	0.0003	0.0177	0.0055		0.3982	1.1586	1.303	0.9068	1.2338	1.1897	0.7733	0.8975		100	100	100	100	100	100	100	100		guanosine 2'-monophosphate (2'-GMP)*	Nucleotide	Purine metabolism	100002733
	948	215	39786	Nucleotide	Purine metabolism	guanosine 3'-monophosphate (3'-GMP)		0.66	0.14	0.15	0.14	0.07	0.07		0.391	0.1783	0.0005	0.0005	0.0042	0.002	0.0023	0.0022	0.001	0.0008	0.0011	0.0007		0.1567	0.9589	2.1218	0.7562	1.0786	2.1571	0.1037	0.1484		50	100	100	100	100	100	0	25		guanosine 3'-monophosphate (3'-GMP)	Nucleotide	Purine metabolism	100002704
	930	216	2849	Nucleotide	Purine metabolism	guanosine 5'- monophosphate (5'-GMP)		1.49	1.53	0.47	0.72	0.66	4.69		0.0044	0.0059	0.007	0.0028	0.0012	0.0009	0.0342	0.0168	0.0179	0.0073	0.0005	0.0004		1.0055	1.3822	0.9901	0.9811	0.8979	0.1383	1.5006	0.6486		100	100	100	100	100	25	100	100		guanosine 5'- monophosphate (5'-GMP)	Nucleotide	Purine metabolism	347
	931	217	37139	Nucleotide	Purine metabolism	guanosine-2',3'-cyclic monophosphate		1.48	0.53	0.63	0.46	0.32	0.22		0.1187	0.0681	0.0019	0.0011	0.0047	0.0022	0.0016	0.0017	0.0003	0.0003	7.9875e-07	7.0294e-06		0.2921	1.1995	2.3254	0.8184	1.6543	3.4481	0.4321	0.7554		100	100	100	100	100	100	100	100		guanosine-2',3'-cyclic monophosphate	Nucleotide	Purine metabolism	74
	933	226	3127	Nucleotide	Purine metabolism	hypoxanthine		1.3	1.04	0.32	0.12	0.32	0.14		0.995	0.3704	0.7252	0.1087	0.0974	0.0249	0.026	0.0134	0.1035	0.0298	0.0356	0.0097		1.3828	0.7223	0.7134	1.7316	1.8958	1.6905	1.7982	0.2285		100	100	100	100	100	100	100	100		hypoxanthine	Nucleotide	Purine metabolism	171
	934	230	1123	Nucleotide	Purine metabolism	inosine		0.28	0.26	0.16	0.22	0.53	0.63		2.563e-05	0.0003	0.0015	0.0009	0.0004	0.0004	0.0009	0.001	0.0086	0.0041	0.0407	0.0106		3.9197	1.459	0.4455	4.1267	1.0661	0.3707	1.0912	0.2347		100	100	100	100	100	100	100	100		inosine	Nucleotide	Purine metabolism	361
	935	231	2133	Nucleotide	Purine metabolism	inosine 5'-monophosphate (IMP)		0.63	0.56	0.08	0.17	0.45	1.28		0.0003	0.0009	0.0011	0.0007	0.0028	0.0015	0.0055	0.004	0.1177	0.0326	0.0653	0.0152		2.3762	1.1172	0.1915	2.672	0.5042	0.068	1.4994	0.087		100	100	100	100	100	0	100	75		inosine 5'-monophosphate (IMP)	Nucleotide	Purine metabolism	362
	936	271	15650	Nucleotide	Purine metabolism	N1-methyladenosine		1.28	1.39	1.4	1.59	1.89	1.23		0.3487	0.1637	0.2105	0.0385	0.0627	0.0178	0.0139	0.0082	0.0041	0.0024	0.2529	0.0444		1.0721	0.9952	0.7386	0.9846	0.8763	1.1394	1.3702	1.3974		100	100	100	100	100	100	100	100		N1-methyladenosine	Nucleotide	Purine metabolism	1242
	937	272	31609	Nucleotide	Purine metabolism	N1-methylguanosine		0.8	1.2	1.04	1.63	1.39	1.47		0.0872	0.053	0.1623	0.0312	0.77	0.1392	0.0071	0.0048	0.0355	0.0128	0.0261	0.0076		1.5448	1.0905	0.8146	1.0299	0.6983	0.7746	1.235	1.1361		100	100	100	100	100	100	100	100		N1-methylguanosine	Nucleotide	Purine metabolism	100001122
	939	273	35137	Nucleotide	Purine metabolism	N2,N2-dimethylguanosine		2.92	2.96	1.37	2.08	4.34	3.65		0.0286	0.0223	0.0259	0.007	0.0189	0.0066	0.0987	0.0396	0.014	0.0061	0.0189	0.0058		0.5999	1.1841	0.3744	0.5909	0.7821	0.4453	1.7499	1.6264		75	100	50	75	75	50	100	100		N2,N2-dimethylguanosine	Nucleotide	Purine metabolism	100001412
	940	274	35133	Nucleotide	Purine metabolism	N2-methylguanosine		2.5	1.85	0.85	1.03	1.04	1.36		0.0615	0.0399	0.1642	0.0313	0.176	0.0409	0.9066	0.2282	0.7879	0.144	0.0474	0.012		0.2349	1.4244	1.1659	0.3171	1.1839	0.8922	0.5873	1.2137		100	100	100	100	100	100	100	100		N2-methylguanosine	Nucleotide	Purine metabolism	100001467
	923	276	35157	Nucleotide	Purine metabolism	N6-carbamoylthreonyladenosine		0.78	1.34	0.71	1	1	1		0.1027	0.0604	0.0203	0.006	0.1615	0.0387	0.391	0.1167						1.4152	0.5179	0.367	0.8207	0.3687	0.367	1.0996	0.367		100	75	0	100	25	0	100	25		N6-carbamoylthreonyladenosine	Nucleotide	Purine metabolism	100001415
	942	279	37114	Nucleotide	Purine metabolism	N6-methyladenosine		0.61	0.55	0.71	0.69	0.7	0.65		0.2066	0.1079	0.0376	0.0095	0.3194	0.0679	0.2216	0.0744	0.1985	0.0495	0.1169	0.0241		1.1493	1.247	1.2658	1.275	1.2808	1.3686	0.6968	0.883		100	100	100	100	100	100	100	100		N6-methyladenosine	Nucleotide	Purine metabolism	213
	956	280	48130	Nucleotide	Purine metabolism	N6-succinyladenosine		1.25	1.67	1.52	1.65	1.65	1.65		0.1391	0.078	0.077	0.0172	0.2987	0.0646	0.2146	0.0731	0.2146	0.0525	0.2146	0.0394		1.1119	0.0296	0.0272	0.8327	0.0272	0.0272	1.3889	0.045		100	25	0	100	25	0	100	50		N6-succinyladenosine	Nucleotide	Purine metabolism	100001664
	943	416	1604	Nucleotide	Purine metabolism	urate		0.34	0.19	0.49	0.32	0.35	0.34		0.0726	0.0452	0.064	0.0149	0.0839	0.0225	0.0266	0.0136	0.0384	0.0135	0.032	0.0089		0.3146	1.0261	1.428	0.5531	1.5634	1.4953	0.1065	0.5045		100	100	100	100	100	100	0	100		urate	Nucleotide	Purine metabolism	1134
	944	429	3147	Nucleotide	Purine metabolism	xanthine		1.33	1.13	0.38	0.18	0.3	0.19		0.9594	0.3614	0.8243	0.1208	0.0398	0.0126	0.0059	0.0042	0.0209	0.0082	0.0089	0.0031		1.033	0.712	0.9026	1.2135	1.5396	1.3977	1.3755	0.2701		100	100	100	100	100	100	100	100		xanthine	Nucleotide	Purine metabolism	1004
	945	430	15136	Nucleotide	Purine metabolism	xanthosine		0.37	0.32	0.25	0.22	0.31	0.33		0.0075	0.0083	0.0017	0.001	0.001	0.0008	0.0004	0.0006	0.0016	0.0011	0.0056	0.0022		2.1704	1.1109	0.8866	2.4818	1.247	0.8253	0.7996	0.273		100	100	100	100	100	100	100	100		xanthosine	Nucleotide	Purine metabolism	100000299
	962	37	15949	Nucleotide	Pyrimidine metabolism	2'-deoxycytidine		0.43	0.41	0.58	0.71	1	0.55		0.0014	0.0023	0.0029	0.0015	0.0079	0.0032	0.0436	0.0205	0.8991	0.1609	0.0056	0.0022		1.8363	1.1771	0.6832	1.9229	0.9628	1.2324	0.7913	0.6809		100	100	100	100	100	100	100	100		2'-deoxycytidine	Nucleotide	Pyrimidine metabolism	100000125
	963	38	533	Nucleotide	Pyrimidine metabolism	2'-deoxycytidine 5'-monophosphate		0.65	0.6	0.52	0.64	0.74	4.31		0.0285	0.0223	0.0049	0.0022	0.0127	0.0047	0.0481	0.0222	0.1173	0.0326	0.0248	0.0073		1.5627	1.2398	0.8649	1.7003	0.9989	0.1483	1.0118	0.6397		100	100	100	100	100	75	100	100		2'-deoxycytidine 5'-monophosphate	Nucleotide	Pyrimidine metabolism	298
	965	63	1566	Nucleotide	Pyrimidine metabolism	3-aminoisobutyrate		1.5	2.21	0.76	1.28	0.58	0.96		0.0077	0.0085	0.0003	0.0003	0.0384	0.0122	0.0288	0.0146	0.0009	0.0007	0.5699	0.0863		0.5318	1.5778	2.0589	0.3596	0.9387	1.2462	0.7963	1.2001		100	100	100	100	100	100	100	100		3-aminoisobutyrate	Nucleotide	Pyrimidine metabolism	1114
	1000	76	3155	Nucleotide	Pyrimidine metabolism	3-ureidopropionate		0.54	0.32	0.89	0.23	0.38	0.16		0.391	0.1783	0.0622	0.0147	0.391	0.0802	0.0022	0.0021	0.0002	0.0003	0.0003	0.0002		0.4665	0.2841	0.6702	0.7786	1.0962	1.6209	0.2529	0.2529		25	50	100	75	100	100	0	0		3-ureidopropionate	Nucleotide	Pyrimidine metabolism	1053
	969	87	1559	Nucleotide	Pyrimidine metabolism	5,6-dihydrouracil		2.01	2.01	0.62	0.24	0.18	0.14		0.391	0.1783	0.391	0.0655	0.391	0.0802	0.0578	0.0257	0.0001	0.0002	2.5966e-05	4.7564e-05		0.1827	0.2928	1.0357	0.1827	0.7763	1.3527	0.3669	0.1827		0	25	100	25	75	100	25	0		5,6-dihydrouracil	Nucleotide	Pyrimidine metabolism	1125
	973	88	38159	Nucleotide	Pyrimidine metabolism	5-methyl-2'-deoxycytidine		0.47	0.44	0.66	0.76	1.09	0.58		0.0001	0.0005	9.4966e-05	0.0001	0.0277	0.0092	0.0972	0.0392	0.6433	0.1249	0.0101	0.0035		1.5421	1.0543	0.6412	1.6459	0.917	1.206	0.7186	0.6959		100	100	100	100	100	100	100	100		5-methyl-2'-deoxycytidine	Nucleotide	Pyrimidine metabolism	100002300
	970	89	22119	Nucleotide	Pyrimidine metabolism	5-methylcytidine		1.04	0.79	0.88	0.96	0.92	1.01		0.8643	0.3393	0.1534	0.0301	0.3262	0.0692	0.6527	0.1783	0.4504	0.094	0.9818	0.1348		0.4825	1.2294	1.1784	0.6348	1.128	1.0638	0.5023	1.0791		100	100	100	100	100	100	100	100		5-methylcytidine	Nucleotide	Pyrimidine metabolism	100000763
	972	91	35136	Nucleotide	Pyrimidine metabolism	5-methyluridine (ribothymidine)		2.04	1.25	0.78	0.92	0.96	1.35		0.0698	0.044	0.5667	0.0868	0.0114	0.0043	0.1881	0.0661	0.5484	0.1093	0.0052	0.0021		0.2734	1.5396	1.2538	0.4476	1.3097	0.8875	0.559	1.2006		100	100	100	100	100	100	100	100		5-methyluridine (ribothymidine)	Nucleotide	Pyrimidine metabolism	100001446
	994	125	55	Nucleotide	Pyrimidine metabolism	beta-alanine		4.03	3.17	2.09	1.74	1.13	0.93		0.0015	0.0024	0.0036	0.0018	0.0111	0.0042	0.0336	0.0166	0.6072	0.1191	0.6641	0.0976		0.1774	0.8934	1.6549	0.2253	1.0721	2.0096	0.7151	1.8658		100	100	100	100	100	100	100	100		beta-alanine	Nucleotide	Pyrimidine metabolism	244
	974	145	514	Nucleotide	Pyrimidine metabolism	cytidine		0.51	0.5	0.65	0.76	0.75	0.78		0.0001	0.0006	4.5605e-05	0.0001	0.0018	0.0011	0.0123	0.0075	0.0109	0.005	0.0604	0.0143		1.0242	1.2164	1.0502	1.0502	1.041	1.0085	0.5215	0.7903		100	100	100	100	100	100	100	100		cytidine	Nucleotide	Pyrimidine metabolism	827
	978	146	37465	Nucleotide	Pyrimidine metabolism	cytidine 2',3'-cyclic monophosphate		0.87	0.29	0.76	0.58	0.47	0.41		0.8541	0.3361	0.0009	0.0006	0.055	0.0162	0.001	0.0011	4.3911e-05	0.0001	1.2416e-05	3.1134e-05		0.1874	1.2246	1.9897	0.5681	1.6224	2.2643	0.1627	0.9332		100	100	100	100	100	100	100	100		cytidine 2',3'-cyclic monophosphate	Nucleotide	Pyrimidine metabolism	73
	976	147	2959	Nucleotide	Pyrimidine metabolism	cytidine 3'-monophosphate (3'-CMP)		1.25	0.42	0.81	0.78	0.64	0.77		0.2835	0.1428	0.0036	0.0018	0.0667	0.0186	0.0375	0.018	0.0042	0.0024	0.0293	0.0083		0.3087	1.0639	1.3547	0.91	1.097	1.1164	0.3862	0.8611		100	100	100	100	100	100	100	100		cytidine 3'-monophosphate (3'-CMP)	Nucleotide	Pyrimidine metabolism	105
	975	148	2372	Nucleotide	Pyrimidine metabolism	cytidine 5'-monophosphate (5'-CMP)		0.49	0.62	0.22	0.36	0.33	1.33		0.0059	0.007	0.0275	0.0074	0.0053	0.0024	0.0218	0.0116	0.0172	0.0071	0.4592	0.0725		1.4077	1.5942	1.0597	1.1077	0.9719	0.2644	0.6885	0.351		100	100	100	100	100	100	100	100		cytidine 5'-monophosphate (5'-CMP)	Nucleotide	Pyrimidine metabolism	282
	977	149	573	Nucleotide	Pyrimidine metabolism	cytosine		0.11	0.11	0.12	0.16	0.18	0.29		5.9542e-06	0.0001	0.0006	0.0005	0.0083	0.0033	3.2973e-06	5.8248e-05	0.0006	0.0006	0.0007	0.0005		2.7753	1.6261	1.0723	2.8618	1.2152	0.6721	0.3175	0.1944		100	100	100	100	100	100	100	100		cytosine	Nucleotide	Pyrimidine metabolism	881
	980	154	35651	Nucleotide	Pyrimidine metabolism	ectoine		0.08	0.05	0.13	0.12	0.25	0.14		0.0001	0.0005	0.0002	0.0002	0.0023	0.0013	0.0605	0.0266	0.0608	0.0201	0.0182	0.0056		1.6653	0.9262	0.4748	2.8196	0.9572	0.8637	0.135	0.118		100	100	75	100	75	100	25	25		ectoine	Nucleotide	Pyrimidine metabolism	100001635
	982	327	1505	Nucleotide	Pyrimidine metabolism	orotate		0.19	0.24	0.44	0.77	0.96	1.72		0.0009	0.0019	0.0054	0.0023	0.0044	0.0021	0.1712	0.0622	0.6947	0.1315	0.0266	0.0077		7.5233	1.3865	0.6375	6.1137	0.7952	0.3564	1.46	0.6147		100	100	100	100	100	100	100	100		orotate	Nucleotide	Pyrimidine metabolism	445
	984	348	33442	Nucleotide	Pyrimidine metabolism	pseudouridine		1	0.76	1.05	1.12	1.02	1.22		0.9196	0.3543	0.109	0.0224	0.6513	0.122	0.2537	0.0828	0.8924	0.16	0.1691	0.0325		0.5783	1.1634	1.2013	0.76	1.0881	1.0011	0.5758	1.2226		100	100	100	100	100	100	100	100		pseudouridine	Nucleotide	Pyrimidine metabolism	821
	985	400	2183	Nucleotide	Pyrimidine metabolism	thymidine		0.58	0.73	0.64	0.82	1.24	0.57		0.0018	0.0028	0.0165	0.0054	0.0898	0.0236	0.359	0.109	0.4943	0.1012	0.0477	0.012		2.4381	0.9289	0.4751	1.9537	0.7159	1.0348	1.4185	0.5899		100	100	100	100	100	100	100	100		thymidine	Nucleotide	Pyrimidine metabolism	872
	1001	401	37122	Nucleotide	Pyrimidine metabolism	thymidine 3'-monophosphate		0.39	0.33	0.45	0.83	1.05	3.54		0.0009	0.0019	0.0005	0.0005	0.0039	0.002	0.1726	0.0625	0.656	0.1257	0.0015	0.0009		2.865	1.5874	0.6867	3.406	0.8645	0.203	1.1107	0.7192		100	100	100	100	100	100	100	100		thymidine 3'-monophosphate	Nucleotide	Pyrimidine metabolism	100001938
	986	402	12023	Nucleotide	Pyrimidine metabolism	thymidine 5'-monophosphate		0.67	0.55	0.51	0.65	0.75	6.31		0.127	0.0718	0.0194	0.0059	0.0031	0.0017	0.0212	0.0114	0.0663	0.0211	0.0132	0.0043		1.3802	1.4145	0.952	1.6841	1.0988	0.1132	0.9305	0.7145		100	100	100	100	100	100	100	100		thymidine 5'-monophosphate	Nucleotide	Pyrimidine metabolism	1248
	988	415	605	Nucleotide	Pyrimidine metabolism	uracil		1.68	2.63	1.35	0.98	0.98	0.68		0.1003	0.0594	0.0134	0.0046	0.7661	0.1388	0.6676	0.181	0.6547	0.1257	0.2407	0.0429		1.886	0.6186	0.846	1.2	0.8462	1.2205	3.1594	0.8323		100	100	100	100	100	100	100	100		uracil	Nucleotide	Pyrimidine metabolism	825
	989	417	606	Nucleotide	Pyrimidine metabolism	uridine		0.5	0.61	0.47	0.77	1.1	0.92		0.0015	0.0024	0.0037	0.0018	0.0016	0.001	0.0732	0.0309	0.5313	0.1065	0.5621	0.0858		2.7577	1.3628	0.5806	2.2419	0.8325	0.6948	1.3707	0.6384		100	100	100	100	100	100	100	100		uridine	Nucleotide	Pyrimidine metabolism	535
	1002	418	52444	Nucleotide	Pyrimidine metabolism	uridine 2'-monophosphate (2'-UMP)*		0.76	0.36	0.62	0.59	0.63	0.75		0.3859	0.1783	0.0002	0.0002	0.0064	0.0028	0.0053	0.0039	0.0065	0.0034	0.0575	0.0138		0.581	1.1777	1.1618	1.2269	1.2424	0.9737	0.4421	0.7284		100	100	100	100	100	100	100	100		uridine 2'-monophosphate (2'-UMP)*	Nucleotide	Pyrimidine metabolism	100008975
	997	419	39764	Nucleotide	Pyrimidine metabolism	uridine 3'-monophosphate (3'-UMP)		1.01	0.38	0.69	0.71	0.71	0.81		0.7919	0.3172	0.002	0.0011	0.0044	0.0021	0.0037	0.003	0.0028	0.0017	0.0252	0.0074		0.782	1.1233	1.0938	2.0621	1.0937	0.9536	0.7862	0.7723		100	100	100	100	100	100	100	100		uridine 3'-monophosphate (3'-UMP)	Nucleotide	Pyrimidine metabolism	106
	990	420	5345	Nucleotide	Pyrimidine metabolism	uridine 5'-diphosphate (UDP)		1	1	0.49	0.1	0.05	0.05						0.4894	0.0974	0.0122	0.0075	0.0051	0.0028	0.0081	0.0029		0.0245	0.16	1.5358	0.0245	0.7559	1.5016	0.0245	0.0778		0	50	100	25	100	100	0	25		uridine 5'-diphosphate (UDP)	Nucleotide	Pyrimidine metabolism	870
	991	421	2856	Nucleotide	Pyrimidine metabolism	uridine 5'-monophosphate (UMP)		0.75	0.53	0.34	0.39	0.45	1.75		0.3282	0.1565	0.0331	0.0085	0.0014	0.0009	0.0054	0.004	0.0049	0.0027	0.1181	0.0243		0.8612	1.4347	1.0824	1.2266	1.2708	0.2813	0.6479	0.4914		100	100	100	100	100	100	100	100		uridine 5'-monophosphate (UMP)	Nucleotide	Pyrimidine metabolism	869
	992	422	37137	Nucleotide	Pyrimidine metabolism	uridine-2',3'-cyclic monophosphate		0.84	0.3	0.66	0.52	0.44	0.33		0.6215	0.2629	3.0393e-05	8.3999e-05	0.0025	0.0014	0.0003	0.0004	7.8555e-05	0.0001	2.1904e-05	4.4273e-05		0.3099	1.1081	1.6343	0.8602	1.387	2.18	0.2608	0.7265		100	100	100	100	100	100	100	100		uridine-2',3'-cyclic monophosphate	Nucleotide	Pyrimidine metabolism	75
	1035	107	37093	Peptide	Dipeptide	alanylleucine		0.65	0.75	0.61	0.88	0.76	1.26		0.0045	0.0059	0.0196	0.0059	0.0011	0.0008	0.2635	0.0857	0.0118	0.0053	0.0411	0.0106		1.3125	1.2585	1.0209	1.1468	0.8781	0.611	0.857	0.7728		100	100	100	100	100	100	100	100		alanylleucine	Peptide	Dipeptide	100001890
	1051	141	18368	Peptide	Dipeptide	cys-gly, oxidized		2.26	7.44	4.84	8.3	8.85	6.3		0.0045	0.0059	5.9253e-05	0.0001	0.0066	0.0028	0.0005	0.0007	0.0007	0.0006	0.0011	0.0007		4.8979	0.4712	0.2575	1.4855	0.2745	0.3617	11.0555	2.2792		100	100	100	100	100	100	100	100		cys-gly, oxidized	Peptide	Dipeptide	1224
	1194	197	42994	Peptide	Dipeptide	glutamine-leucine		0.7	0.88	0.57	0.84	0.75	1.25		0.0164	0.0154	0.207	0.038	0.0014	0.001	0.1327	0.0504	0.0142	0.0061	0.0357	0.0097		1.4132	1.2966	0.9838	1.1297	0.8771	0.5894	0.9886	0.7394		100	100	100	100	100	100	100	100		glutamine-leucine	Peptide	Dipeptide	100003160
	1064	209	36659	Peptide	Dipeptide	glycylisoleucine		0.92	1.25	0.94	1.2	1.25	2.06		0.3283	0.1565	0.0527	0.0128	0.634	0.1207	0.3448	0.1059	0.2423	0.0576	0.0066	0.0025		2.0509	1.0447	0.7844	1.5081	0.8139	0.4741	1.8898	0.9774		100	100	100	100	100	100	100	100		glycylisoleucine	Peptide	Dipeptide	100001790
	1065	210	34398	Peptide	Dipeptide	glycylleucine		0.78	1.09	0.69	0.97	0.91	1.38		0.0732	0.0452	0.5097	0.0799	0.0102	0.0039	0.8137	0.2104	0.2554	0.0602	0.0198	0.006		1.9516	1.1983	0.9064	1.3985	0.8448	0.5944	1.5291	0.823		100	100	100	100	100	100	100	100		glycylleucine	Peptide	Dipeptide	100001258
	1074	211	18357	Peptide	Dipeptide	glycylvaline		0.83	1.13	0.85	1.16	1.02	1.66		0.1906	0.1015	0.4843	0.0775	0.1976	0.0451	0.2643	0.0857	0.9123	0.1628	0.0061	0.0023		1.7271	1.0477	0.8728	1.2811	0.7657	0.5383	1.4421	0.892		100	100	100	100	100	100	100	100		glycylvaline	Peptide	Dipeptide	100000487
	1117	237	40008	Peptide	Dipeptide	isoleucylglycine		1.02	1.46	1.03	1.39	1.26	1.47		0.9103	0.3521	0.1448	0.0288	0.731	0.1344	0.02	0.0109	0.0364	0.013	0.0214	0.0063		1.687	1.0015	0.8251	1.1751	0.7479	0.7071	1.7132	1.0362		100	100	100	100	100	100	100	100		isoleucylglycine	Peptide	Dipeptide	100003169
	1244	244	48189	Peptide	Dipeptide	leucylglutamine*		0.61	0.61	0.59	0.83	0.83	1.43		0.055	0.0364	0.0161	0.0053	0.0027	0.0015	0.108	0.0425	0.0618	0.0202	0.0171	0.0054		1.28	1.4771	1.0404	1.2829	1.044	0.6051	0.7869	0.8642		100	100	100	100	100	100	100	100		leucylglutamine*	Peptide	Dipeptide	100003183
	1099	245	40045	Peptide	Dipeptide	leucylglycine		0.86	1.34	0.91	1.43	1.31	1.65		0.3171	0.1534	0.1631	0.0312	0.6021	0.1161	0.0536	0.0243	0.0975	0.029	0.0379	0.0101		1.7615	1.0484	0.7308	1.1268	0.6703	0.5785	1.5088	0.9566		100	100	100	100	100	100	100	100		leucylglycine	Peptide	Dipeptide	100003185
	1265	246	52415	Peptide	Dipeptide	leucylphenylalanine/isoleucylphenylalanine		0.39	0.32	0.45	0.64	0.62	0.95		0.0291	0.0226	0.0197	0.0059	6.911e-05	0.0001	0.0014	0.0015	0.0011	0.0009	0.4142	0.0667		0.8882	1.8671	1.3672	1.0978	1.3173	0.8883	0.3459	0.8417		100	100	100	100	100	100	100	100		leucylphenylalanine/isoleucylphenylalanine	Peptide	Dipeptide	100008951
	1136	252	40020	Peptide	Dipeptide	lysylleucine		1.2	1.88	0.69	1.08	0.8	1.39		0.3596	0.1668	0.0199	0.006	0.0072	0.003	0.4785	0.1389	0.0264	0.01	0.0081	0.0029		1.0413	1.3109	1.1271	0.6678	0.8355	0.6507	1.2542	0.9058		100	100	100	100	100	100	100	100		lysylleucine	Peptide	Dipeptide	100003196
	1033	335	41374	Peptide	Dipeptide	phenylalanylalanine		0.42	0.49	0.4	0.6	0.47	0.77		0.0119	0.0119	0.0126	0.0044	1.4597e-05	4.966e-05	0.0014	0.0015	0.0001	0.0002	0.0289	0.0083		0.6404	2.2126	1.8895	0.5461	1.4989	1.1634	0.268	0.8922		100	100	100	100	100	100	100	100		phenylalanylalanine	Peptide	Dipeptide	100003589
	1168	336	41370	Peptide	Dipeptide	phenylalanylglycine		0.64	0.81	0.72	1.02	1.06	1.69		0.0333	0.025	0.2042	0.0376	0.0933	0.0241	0.9171	0.2303	0.7589	0.1391	0.0202	0.006		1.5722	1.3113	0.8951	1.2438	0.9249	0.5596	1.007	0.946		100	100	100	100	100	100	100	100		phenylalanylglycine	Peptide	Dipeptide	100003588
	1058	347	40703	Peptide	Dipeptide	prolylglycine		0.81	1.1	0.91	1.06	1.26	2.3		0.0388	0.0283	0.4706	0.0757	0.6551	0.122	0.7518	0.1972	0.2356	0.0564	0.0055	0.0022		2.3087	1.0007	0.7206	1.7019	0.8554	0.3941	1.8707	0.9072		100	100	100	100	100	100	100	100		prolylglycine	Peptide	Dipeptide	100003674
	1125	399	31530	Peptide	Dipeptide	threonylphenylalanine		0.61	0.75	0.49	0.77	0.62	1.05		0.0021	0.0032	0.0233	0.0065	8.193e-05	0.0002	0.0706	0.03	0.0006	0.0005	0.5075	0.0793		1.2826	1.4915	1.1871	1.0474	0.9481	0.6942	0.7877	0.7303		100	100	100	100	100	100	100	100		threonylphenylalanine	Peptide	Dipeptide	100001125
	1186	424	42079	Peptide	Dipeptide	valylglutamine		0.67	0.76	0.51	0.73	0.72	1.3		0.0727	0.0452	0.1658	0.0315	0.0002	0.0003	0.0304	0.0154	0.0079	0.0039	0.0479	0.012		1.2529	1.4055	0.992	1.1049	0.968	0.5471	0.8374	0.7104		100	100	100	100	100	100	100	100		valylglutamine	Peptide	Dipeptide	100003640
	1019	425	40475	Peptide	Dipeptide	valylglycine		0.86	1.25	0.94	1.27	1.32	1.69		0.4009	0.1802	0.411	0.0679	0.6568	0.122	0.2716	0.0878	0.1836	0.0466	0.0319	0.0089		2.1101	1.0121	0.7163	1.4524	0.7461	0.5591	1.8104	0.9474		100	100	100	100	100	100	100	100		valylglycine	Peptide	Dipeptide	100003641
	1143	426	39994	Peptide	Dipeptide	valylleucine		0.7	0.79	0.58	0.85	0.7	1.2		0.0495	0.0343	0.1276	0.0257	0.0013	0.0009	0.1983	0.0691	0.002	0.0014	0.0751	0.0171		1.1785	1.4593	1.2099	1.036	0.9916	0.7086	0.8219	0.8474		100	100	100	100	100	100	100	100		valylleucine	Peptide	Dipeptide	100003210
	1003	175	37063	Peptide	gamma-glutamyl	gamma-glutamylalanine		1.43	1.91	2.53	3.42	2.9	4.8		0.2109	0.1097	0.0422	0.0105	0.009	0.0035	0.002	0.0019	0.0084	0.0041	0.0008	0.0006		3.2218	0.751	0.6561	2.4138	0.5567	0.3964	4.6132	1.9026		100	100	100	100	100	100	100	100		gamma-glutamylalanine	Peptide	gamma-glutamyl	100001843
	1005	176	36738	Peptide	gamma-glutamyl	gamma-glutamylglutamate		0.69	1.08	1.22	1.97	1.91	2.67		0.0069	0.0078	0.4705	0.0757	0.1602	0.0386	0.002	0.0019	0.0026	0.0017	0.0002	0.0002		4.0348	0.8876	0.5659	2.5764	0.5503	0.4052	2.7706	1.0834		100	100	100	100	100	100	100	100		gamma-glutamylglutamate	Peptide	gamma-glutamyl	331
	1006	177	2730	Peptide	gamma-glutamyl	gamma-glutamylglutamine		0.34	0.6	0.34	0.63	0.64	1.29		0.0028	0.004	0.0278	0.0074	0.03	0.0098	0.1675	0.0617	0.1758	0.0454	0.6939	0.1007		4.8175	1.4581	0.784	2.726	0.7954	0.3878	1.6449	0.5022		100	100	100	100	100	100	100	100		gamma-glutamylglutamine	Peptide	gamma-glutamyl	1140
	1007	178	33949	Peptide	gamma-glutamyl	gamma-glutamylglycine		1.78	1.55	1.16	1.96	1.47	3.19		0.0002	0.0008	0.0202	0.006	0.6102	0.1174	0.0824	0.034	0.2758	0.0642	0.016	0.0051		1.0643	0.7128	0.5624	1.2237	0.4227	0.2601	1.8955	0.8286		100	75	75	100	75	0	100	100		gamma-glutamylglycine	Peptide	gamma-glutamyl	100001294
	1009	179	34456	Peptide	gamma-glutamyl	gamma-glutamylisoleucine*		1.43	1.69	1.52	1.61	1.45	1.9		0.2418	0.1238	0.0983	0.0206	0.175	0.0408	0.1331	0.0504	0.2215	0.0539	0.0587	0.014		1.2102	0.9735	1.0176	1.0234	0.92	0.7766	1.7267	1.4789		100	100	100	100	100	100	100	100		gamma-glutamylisoleucine*	Peptide	gamma-glutamyl	100001485
	1010	180	18369	Peptide	gamma-glutamyl	gamma-glutamylleucine		1.14	0.83	1.5	1.19	1.5	1.66		0.8976	0.3489	0.386	0.0652	0.2031	0.0462	0.6204	0.1708	0.2082	0.0511	0.1217	0.0249		1.2275	0.7597	0.7624	1.6879	0.9587	0.6878	1.3953	1.1401		100	100	100	100	100	100	100	100		gamma-glutamylleucine	Peptide	gamma-glutamyl	1268
	1012	181	44872	Peptide	gamma-glutamyl	gamma-glutamylmethionine		0.73	1.6	0.71	1.13	0.89	1.89		0.1737	0.0945	0.1482	0.0292	0.1265	0.0312	0.6827	0.1841	0.4464	0.0935	0.0394	0.0104		3.6793	1.0742	0.857	1.6892	0.6744	0.402	2.6952	0.7613		100	100	100	100	100	100	100	100		gamma-glutamylmethionine	Peptide	gamma-glutamyl	100001313
	1013	182	33422	Peptide	gamma-glutamyl	gamma-glutamylphenylalanine		1.25	1.33	1.44	1.47	1.66	2.05		0.278	0.141	0.1851	0.0346	0.0662	0.0186	0.0497	0.0228	0.0213	0.0083	0.0052	0.0021		1.4714	0.9157	0.791	1.3915	0.8928	0.6417	1.8465	1.3143		100	100	100	100	100	100	100	100		gamma-glutamylphenylalanine	Peptide	gamma-glutamyl	100000491
	1014	183	33364	Peptide	gamma-glutamyl	gamma-glutamylthreonine*		1.52	2.21	1.92	2.51	2.51	4.05		0.0695	0.044	0.0067	0.0027	0.064	0.0182	0.0191	0.0105	0.0183	0.0074	0.0035	0.0015		2.2042	0.9413	0.7202	1.5194	0.7199	0.4467	3.3567	1.809		100	100	100	100	100	100	100	100		gamma-glutamylthreonine*	Peptide	gamma-glutamyl	100001314
	1015	184	33947	Peptide	gamma-glutamyl	gamma-glutamyltryptophan		2.09	2.94	3.63	5.22	4.07	6.98		0.0222	0.0187	0.0041	0.0019	0.0021	0.0013	0.0001	0.0002	0.0006	0.0006	4.7481e-05	7.5219e-05		2.6887	0.6059	0.5409	1.9121	0.4217	0.3154	5.6302	2.2		100	100	100	100	100	100	100	100		gamma-glutamyltryptophan	Peptide	gamma-glutamyl	100001295
	1016	185	2734	Peptide	gamma-glutamyl	gamma-glutamyltyrosine		1.13	1.34	1.06	1.26	1.32	2.27		0.7544	0.306	0.3219	0.0558	0.979	0.1701	0.5318	0.1511	0.4444	0.0935	0.0394	0.0104		1.7522	0.904	0.7257	1.4785	0.7564	0.4215	1.9814	0.9547		100	100	100	100	100	100	100	100		gamma-glutamyltyrosine	Peptide	gamma-glutamyl	1102
	1017	186	43829	Peptide	gamma-glutamyl	gamma-glutamylvaline		1.05	1.6	1.08	1.51	1.25	2.65		0.9756	0.3658	0.0869	0.0188	0.886	0.1564	0.1707	0.0622	0.4638	0.096	0.0119	0.004		1.6814	1.077	0.9333	1.1022	0.7746	0.4403	1.7596	1.1663		100	100	100	100	100	100	100	100		gamma-glutamylvaline	Peptide	gamma-glutamyl	100001126
	1345	81	21133	Secondary metabolism	Benzenoids	4-hydroxybenzoate		1.23	2.27	0.92	1.93	1.22	1.83		0.2991	0.1479	0.0059	0.0025	0.6519	0.122	0.0032	0.0028	0.1608	0.0422	0.005	0.002		1.4196	1.2795	0.966	0.7734	0.6142	0.6452	1.7526	1.1828		100	100	100	100	100	100	100	100		4-hydroxybenzoate	Secondary metabolism	Benzenoids	100000862
	1355	225	38160	Secondary metabolism	Benzenoids	hydroquinone beta-D-glucopyranoside		0.77	1.89	0.96	1.53	0.78	0.97		0.2831	0.1428	0.1413	0.0282	0.639	0.1214	0.0032	0.0028	0.0174	0.0071	0.5498	0.0846		0.7361	1.2566	1.5314	0.3023	0.7834	1.2384	0.5701	1.2004		100	100	100	100	100	100	100	100		hydroquinone beta-D-glucopyranoside	Secondary metabolism	Benzenoids	100002220
	1358	342	17665	Secondary metabolism	Benzenoids	p-hydroxybenzaldehyde		1	0.87	0.73	0.63	0.58	0.65				0.391	0.0655	0.1821	0.0421	0.189	0.0661	0.2273	0.0547	0.391	0.064		0.5584	0.7688	0.961	0.6393	0.8888	0.8562	0.5584	0.5584		25	50	50	25	50	25	0	0		p-hydroxybenzaldehyde	Secondary metabolism	Benzenoids	1276
	1362	369	1515	Secondary metabolism	Benzenoids	salicylate		1.32	1.82	1.76	1.75	1.77	1.73		0.9333	0.3558	0.4319	0.0706	0.1227	0.0305	0.1291	0.0496	0.131	0.0353	0.1393	0.0276		1.3197	1.0007	0.9977	0.9561	1.0072	1.0209	1.744	1.7622		100	100	100	100	100	100	100	100		salicylate	Secondary metabolism	Benzenoids	501
	1588	68	42561	Secondary metabolism	Benzoxazinoids	3-hydroxyindolin-2-one		0.85	4.25	1.98	14.36	1.22	11.02		0.773	0.3109	8.4989e-05	0.0001	0.0197	0.0068	0.0001	0.0002	0.2963	0.0683	0.0027	0.0013		0.8823	1.7343	2.8186	0.1762	0.2388	0.3112	0.7491	3.4299		100	100	100	25	100	75	100	100		3-hydroxyindolin-2-one	Secondary metabolism	Benzoxazinoids	100003823
	1368	170	20881	Secondary metabolism	Fatty acid and sugar derivatives	galactarate (mucic acid)		0.55	0.65	0.63	0.56	0.91	0.71		0.0001	0.0005	0.0061	0.0025	0.0009	0.0008	0.0008	0.001	0.0991	0.0292	0.017	0.0054		1.1569	1.2399	0.8666	0.9874	1.4074	1.1045	0.6385	0.7861		100	100	100	100	100	100	100	100		galactarate (mucic acid)	Secondary metabolism	Fatty acid and sugar derivatives	100000881
	1414	302	44663	Secondary metabolism	Flavonoids	naringenin		2.17	2.17	0.75	0.34	1	0.11		0.391	0.1783	0.392	0.0655	0.391	0.0802	0.064	0.0278			0.0019	0.001		0.2295	0.3054	0.2295	0.2298	0.669	2.0581	0.4991	0.2295		0	25	25	25	75	100	25	0		naringenin	Secondary metabolism	Flavonoids	100000920
	1482	61	37454	Secondary metabolism	Phenylpropanoids	3,4-dimethoxycinnamic acid		2.89	6.58	4.93	18.82	5.43	16.25		0.0007	0.0017	0.0004	0.0004	4.0221e-05	9.8182e-05	6.1273e-07	2.4215e-05	0.0001	0.0002	1.6746e-05	3.9263e-05		1.5139	1.0507	0.9534	0.6646	0.2753	0.3188	4.375	5.1798		100	100	100	100	100	100	100	100		3,4-dimethoxycinnamic acid	Secondary metabolism	Phenylpropanoids	100001976
	1492	82	36770	Secondary metabolism	Phenylpropanoids	4-hydroxycinnamate		2.07	2.22	2.02	2.01	1.59	1.39		0.0024	0.0034	0.004	0.0019	0.0566	0.0165	0.0628	0.0274	0.1718	0.0445	0.3278	0.056		0.6523	0.9156	1.1595	0.6078	0.9179	1.3311	1.3486	1.8473		100	100	100	100	100	100	100	100		4-hydroxycinnamate	Secondary metabolism	Phenylpropanoids	100001675
	1495	140	36745	Secondary metabolism	Phenylpropanoids	coniferyl aldehyde		1.24	1.55	2.21	2.16	2.1	1.35		0.0545	0.0364	0.0193	0.0059	0.0076	0.0031	0.0091	0.006	0.0314	0.0116	0.1973	0.0368		0.9081	0.8899	0.9326	0.7257	0.9106	1.4589	1.128	1.9628		100	100	100	100	100	100	100	100		coniferyl aldehyde	Secondary metabolism	Phenylpropanoids	100001684
	1497	163	35630	Secondary metabolism	Phenylpropanoids	ferulate		2.58	4.22	1.71	1.52	1.14	0.96		0.438	0.193	0.2003	0.0373	0.4704	0.0944	0.6594	0.1797	0.8416	0.1527	0.5311	0.0824		0.5369	0.9228	1.3872	0.3287	1.0363	1.6411	1.3865	1.5798		100	100	100	100	100	100	100	100		ferulate	Secondary metabolism	Phenylpropanoids	100001542
	1528	187	48729	Secondary metabolism	Phenylpropanoids	gentisic acid-5-glucoside		1.33	4.17	1.62	1.68	1.68	1.68		0.7236	0.2966	0.2955	0.0516	0.2793	0.061	0.2488	0.0819	0.2488	0.0588	0.2488	0.0441		2.0744	0.6808	0.6599	0.6599	0.6599	0.6599	2.7507	1.1059		100	25	0	25	0	0	75	50		gentisic acid-5-glucoside	Secondary metabolism	Phenylpropanoids	100006372
	1484	235	37450	Secondary metabolism	Phenylpropanoids	isoferulate		3.57	8.32	2.57	2.05	1.49	1.09		0.2114	0.1097	0.0568	0.0136	0.0735	0.0202	0.1589	0.0589	0.46	0.0955	0.8502	0.1184		0.4025	0.8249	1.4217	0.173	1.0368	1.9426	1.4387	2.1214		100	100	100	75	100	100	100	100		isoferulate	Secondary metabolism	Phenylpropanoids	100002058
	1504	375	36773	Secondary metabolism	Phenylpropanoids	sinapoyl aldehyde		1	1	1.5	1.5	1.5	1.35						0.3403	0.0719	0.3403	0.1052	0.3403	0.0772	0.5118	0.0798		0.7793	0.7793	0.7793	0.7793	0.7793	0.868	0.7793	1.1725		0	0	0	0	0	25	0	75		sinapoyl aldehyde	Secondary metabolism	Phenylpropanoids	100001685
	1506	391	37449	Secondary metabolism	Phenylpropanoids	syringaldehyde		0.45	0.68	0.45	0.79	0.64	0.76		0.3981	0.1802	0.1827	0.0343	0.1948	0.0446	0.2217	0.0744	0.2268	0.0547	0.1874	0.0353		3.5301	0.6235	0.4362	2.3107	0.3564	0.3681	1.5781	0.2811		100	50	50	100	50	75	100	0		syringaldehyde	Secondary metabolism	Phenylpropanoids	100002050
	1518	392	37091	Secondary metabolism	Phenylpropanoids	syringic acid		0.47	1.6	0.85	1.46	1.46	1.19		0.0182	0.0165	0.0077	0.0029	0.5072	0.1003	0.391	0.1167	0.391	0.0852	0.763	0.1085		2.8778	0.5987	0.3497	0.8544	0.3497	0.4305	1.3634	0.5116		100	75	0	100	0	50	100	25		syringic acid	Secondary metabolism	Phenylpropanoids	100001919
	1527	427	35639	Secondary metabolism	Phenylpropanoids	vanillate		1.89	1.81	1.79	2.73	2.26	2.28		0.005	0.0062	0.0002	0.0002	0.0068	0.0028	0.0007	0.0009	4.8257e-05	0.0001	0.0004	0.0003		1.0863	0.924	0.7314	1.1381	0.6062	0.7259	2.0544	1.654		100	100	100	100	100	100	100	100		vanillate	Secondary metabolism	Phenylpropanoids	100001634
	1508	428	37442	Secondary metabolism	Phenylpropanoids	vanillin		0.57	0.51	0.64	0.55	0.58	0.46		0.1995	0.1055	0.1303	0.0261	0.1597	0.0386	0.0913	0.0372	0.1144	0.0321	0.053	0.0129		1.5074	0.8751	0.9656	1.6825	1.0312	1.2174	0.8575	0.5644		100	100	100	100	100	100	100	75		vanillin	Secondary metabolism	Phenylpropanoids	100002051
	1559	268	39583	Secondary metabolism	Terpenoids	mevalonate		0.52	0.53	0.38	0.38	0.63	0.75		0.0046	0.006	0.0055	0.0024	0.0001	0.0002	0.0001	0.0002	0.0023	0.0015	0.0164	0.0052		1.3139	1.3333	0.7997	1.2818	1.3214	0.6743	0.6853	0.5036		100	100	100	100	100	100	100	100		mevalonate	Secondary metabolism	Terpenoids	30
	1573	269	48118	Secondary metabolism	Terpenoids	mevalonolactone		0.31	0.26	0.26	0.18	0.48	0.5		0.0004	0.0012	0.0002	0.0003	0.0002	0.0003	5.9462e-05	0.0002	0.0034	0.0021	0.0064	0.0024		1.9186	1.3423	0.7221	2.295	1.9089	0.7002	0.6016	0.3486		100	100	100	100	100	100	100	100		mevalonolactone	Secondary metabolism	Terpenoids	100000772
	1642	387	41888	Xenobiotics	Chemicals	succinimide		0.2	0.19	0.28	0.33	0.44	0.42		0.0012	0.0022	0.0009	0.0006	0.0045	0.0021	0.0063	0.0044	0.0194	0.0077	0.0168	0.0053		4.3991	1.3491	0.8571	4.5663	1.1437	0.8947	0.88	0.3747		100	100	100	100	100	100	100	100		succinimide	Xenobiotics	Chemicals	100003696
[truncated: 7 more columns]

## Sheet: Maize Box Plots 
	Biochemical Name	Super Pathway	Sub Pathway	Pathway Order	Alpha	Comp ID
	1,3-diaminopropane	Amino acid	Glutamate family (alpha-ketoglutarate derived)	147	1	1654
	1,5-anhydroglucitol (1,5-AG)	Carbohydrate	Sucrose, glucose,fructose metabolism	469	2	20675
	13-HODE + 9-HODE	Lipids	Oxylipins	581	3	37752
	1-kestose	Carbohydrate	Sucrose, glucose,fructose metabolism	396	4	22012
	1-linoleoylglycerol (18:2)	Lipids	Glycerolipids	606	5	27447
	1-linoleoyl-GPC (18:2)	Lipids	Phospholipids	636	6	34419
	1-linoleoyl-GPE (18:2)*	Lipids	Phospholipids	637	7	32635
	1-linoleoyl-GPI (18:2)*	Lipids	Phospholipids	638	8	36594
	1-margaroylglycerol (17:0)	Lipids	Glycerolipids	633	9	34391
	1-methylhistidine	Amino acid	Glutamate family (alpha-ketoglutarate derived)	194	10	30460
	1-oleoyl-2-linoleoyl-GPI (18:1/18:2)*	Lipids	Phospholipids	723	11	52451
	1-oleoylglycerol (18:1)	Lipids	Glycerolipids	608	12	21184
	1-oleoyl-GPA (18:1)	Lipids	Phospholipids	703	13	36812
	1-oleoyl-GPC (18:1)	Lipids	Phospholipids	641	14	48258
	1-oleoyl-GPE (18:1)	Lipids	Phospholipids	642	15	35628
	1-oleoyl-GPG (18:1)*	Lipids	Glycerolipids	628	16	45968
	1-oleoyl-GPI (18:1)*	Lipids	Phospholipids	643	17	36602
	1-palmitoyl-2-arachidonoyl-GPC (16:0/20:4)*	Lipids	Phospholipids	724	18	52459
	1-palmitoyl-2-linoleoyl-GPC (16:0/18:2)*	Lipids	Phospholipids	720	19	52460
	1-palmitoyl-2-linoleoyl-GPE (16:0/18:2)	Lipids	Phospholipids	721	20	42449
	1-palmitoyl-2-linoleoyl-GPI (16:0/18:2)*	Lipids	Phospholipids	722	21	52450
	1-palmitoyl-2-oleoyl-GPC (16:0/18:1)*	Lipids	Phospholipids	726	22	52461
	1-palmitoyl-2-oleoyl-GPE (16:0/18:1)	Lipids	Phospholipids	725	23	19263
	1-palmitoylglycerol (16:0)	Lipids	Glycerolipids	609	24	21127
	1-palmitoyl-GPA (16:0)	Lipids	Phospholipids	645	25	34428
	1-palmitoyl-GPC (16:0)	Lipids	Phospholipids	646	26	33955
	1-palmitoyl-GPE (16:0)	Lipids	Phospholipids	647	27	35631
	1-palmitoyl-GPG (16:0)*	Lipids	Phospholipids	688	28	45970
	1-palmitoyl-GPI (16:0)*	Lipids	Phospholipids	648	29	35305
	2,3-dihydroxyisovalerate	Amino acid	Branched Chain Amino Acids (pyruvate derived)	223	30	38276
	2-aminoadipate	Amino acid	Aspartate family (OAA derived)	98	31	6146
	2-aminobutyrate	Amino acid	Glutamate family (alpha-ketoglutarate derived)	149	32	1577
	2-aminoheptanoate	Lipids	Fatty acid, Amino	795	33	43761
	2'-deoxyadenosine	Nucleotide	Purine metabolism	907	34	1553
	2'-deoxyadenosine 3'-monophosphate	Nucleotide	Purine metabolism	949	35	40663
	2'-deoxyadenosine 5'-monophosphate	Nucleotide	Purine metabolism	957	36	46333
	2'-deoxycytidine	Nucleotide	Pyrimidine metabolism	962	37	15949
	2'-deoxycytidine 5'-monophosphate	Nucleotide	Pyrimidine metabolism	963	38	533
	2'-deoxyguanosine	Nucleotide	Purine metabolism	908	39	1411
	2'-deoxyguanosine 3'-monophosphate	Nucleotide	Purine metabolism	959	40	41916
	2'-deoxyguanosine 5'-monophosphate (dGMP)	Nucleotide	Purine metabolism	909	41	35662
	2'-deoxyinosine	Nucleotide	Purine metabolism	910	42	15076
	2-dimethylaminoethanol	Lipids	Choline metabolism	731	43	42562
	2-hydroxy-3-methylvalerate	Amino acid	Branched Chain Amino Acids (pyruvate derived)	226	44	36746
	2-hydroxyadipate	Amino acid	Aspartate family (OAA derived)	139	45	31934
	2-hydroxybutyrate/2-hydroxyisobutyrate	Lipids	Free fatty acid	570	46	52281
	2-hydroxyglutarate	Lipids	Fatty acid, Dicarboxylate	814	47	37253
	2-hydroxyoctanoate	Lipids	Free fatty acid	561	48	22036
	2-hydroxypalmitate	Lipids	Free fatty acid	484	49	35675
	2-hydroxystearate	Lipids	Free fatty acid	485	50	17945
	2-isopropylmalate	Amino acid	Branched Chain Amino Acids (pyruvate derived)	247	51	15667
	2-linoleoylglycerol (18:2)	Lipids	Glycerolipids	614	52	32506
	2-methylcitrate/homocitrate	Carbohydrate	TCA cycle	315	53	52282
	2-methylglutarate	Amino acid	BCAA -isoleucine catabolism	221	54	37436
	2'-O-methyladenosine	Nucleotide	Purine metabolism	953	55	42607
	2-oxindole-3-acetate	Hormone metabolism	Auxin metabolism	1295	56	40479
	2-palmitoylglycerol (16:0)	Lipids	Glycerolipids	617	57	33419
	2-piperidinone	Amino acid	Aspartate family (OAA derived)	136	58	43400
	2-pyrrolidinone	Amino acid	Glutamate family (alpha-ketoglutarate derived)	150	59	31675
	3-(4-hydroxyphenyl)lactate	Amino acid	Aromatic amino acid metabolism (PEP derived)	31	60	32197
	3,4-dimethoxycinnamic acid	Secondary metabolism	Phenylpropanoids	1482	61	37454
	3-aminobutyrate	Amino acid	Glutamate family (alpha-ketoglutarate derived)	197	62	42564
	3-aminoisobutyrate	Nucleotide	Pyrimidine metabolism	965	63	1566
	3-deoxyoctulosonate	Carbohydrate	Sucrose, glucose,fructose metabolism	397	64	43805
	3-hydroxy-2-ethylpropionate	Amino acid	Branched Chain Amino Acids (pyruvate derived)	249	65	32397
	3-hydroxy-3-methylglutarate	Lipids	Sterols	740	66	531
	3-hydroxybutyrate (BHBA)	Lipids	Cutin and cuticular	756	67	542
	3-hydroxyindolin-2-one	Secondary metabolism	Benzoxazinoids	1588	68	42561
	3-hydroxyisobutyrate	Amino acid	Branched Chain Amino Acids (pyruvate derived)	228	69	1549
	3-hydroxyoctanoate	Lipids	Free fatty acid	489	70	22001
	3-methoxytyrosine	Amino acid	Aromatic amino acid metabolism (PEP derived)	36	71	12017
	3-methyl-2-oxobutyrate	Amino acid	Branched Chain Amino Acids (pyruvate derived)	229	72	44526
	3-methyl-2-oxovalerate	Amino acid	Branched Chain Amino Acids (pyruvate derived)	230	73	15676
	3-methylglutaconate	Amino acid	Branched Chain Amino Acids (pyruvate derived)	257	74	38667
	3-methylhistidine	Amino acid	Glutamate family (alpha-ketoglutarate derived)	151	75	15677
	3-ureidopropionate	Nucleotide	Pyrimidine metabolism	1000	76	3155
	4-acetamidobutanoate	Amino acid	Glutamate family (alpha-ketoglutarate derived)	152	77	1558
	4-guanidinobutanoate	Amino acid	Glutamate family (alpha-ketoglutarate derived)	203	78	15681
	4-hydroxy-2-nonenal	Lipids	Free fatty acid	492	79	38309
	4-hydroxy-2-oxoglutaric acid	Amino acid	Glutamate family (alpha-ketoglutarate derived)	189	80	40062
	4-hydroxybenzoate	Secondary metabolism	Benzenoids	1345	81	21133
	4-hydroxycinnamate	Secondary metabolism	Phenylpropanoids	1492	82	36770
	4-hydroxy-nonenal-glutathione	Amino acid	Glutathione metabolism	280	83	48487
	4-hydroxyphenylpyruvate	Amino acid	Aromatic amino acid metabolism (PEP derived)	38	84	1669
	4-imidazoleacetate	Amino acid	Glutamate family (alpha-ketoglutarate derived)	205	85	32349
	4-methyl-2-oxopentanoate	Amino acid	Branched Chain Amino Acids (pyruvate derived)	231	86	22116
	5,6-dihydrouracil	Nucleotide	Pyrimidine metabolism	969	87	1559
	5-methyl-2'-deoxycytidine	Nucleotide	Pyrimidine metabolism	973	88	38159
	5-methylcytidine	Nucleotide	Pyrimidine metabolism	970	89	22119
	5-methylthioadenosine (MTA)	Amino acid	Amines and polyamines	261	90	1419
	5-methyluridine (ribothymidine)	Nucleotide	Pyrimidine metabolism	972	91	35136
	5-oxoproline	Amino acid	Glutathione metabolism	271	92	1494
	6-oxopiperidine-2-carboxylic acid	Amino acid	Aspartate family (OAA derived)	135	93	43231
	7-methylguanosine	Nucleotide	Purine metabolism	913	94	31580
	8-hydroxyoctanoate	Lipids	Free fatty acid	496	95	21239
	acetylcarnitine	Lipids	Carnitine metabolism	759	96	32198
	acetylphosphate	Cofactors, Prosthetic Groups, Electron Carriers	Oxidative phosphorylation	853	97	15488
	adenine	Nucleotide	Purine metabolism	915	98	554
	adenosine	Nucleotide	Purine metabolism	916	99	555
	adenosine 2'-monophosphate (2'-AMP)	Nucleotide	Purine metabolism	917	100	36815
	adenosine 3'-monophosphate (3'-AMP)	Nucleotide	Purine metabolism	919	101	35142
	adenosine 5'-monophosphate (AMP)	Nucleotide	Purine metabolism	921	102	32342
	adenosine-2',3'-cyclic monophosphate	Nucleotide	Purine metabolism	922	103	37467
	adipate	Lipids	Fatty acid, Dicarboxylate	816	104	21134
	agmatine	Amino acid	Amines and polyamines	262	105	15496
	alanine	Amino acid	Aspartate family (OAA derived)	101	106	1126
	alanylleucine	Peptide	Dipeptide	1035	107	37093
	allantoic acid	Nucleotide	Purine metabolism	925	108	33434
	allantoin	Nucleotide	Purine metabolism	926	109	1107
	allo-isoleucine	Amino acid	Branched Chain Amino Acids (OAA derived)	217	110	46552
	allo-threonine	Amino acid	Aspartate family (OAA derived)	102	111	15142
	alpha-hydroxycaproate	Lipids	Free fatty acid	557	112	37073
	alpha-hydroxyisocaproate	Amino acid	Branched Chain Amino Acids (pyruvate derived)	234	113	22132
	alpha-hydroxyisovalerate	Amino acid	Branched Chain Amino Acids (pyruvate derived)	235	114	46537
	alpha-ketoglutarate	Carbohydrate	TCA cycle	303	115	528
	alpha-tocopherol	Cofactors, Prosthetic Groups, Electron Carriers	Tocopherol metabolism	882	116	1561
	arabinose	Carbohydrate	Amino sugar and nucleotide sugar	335	117	575
	arabitol	Carbohydrate	Amino sugar and nucleotide sugar	336	118	38075
	arabonate	Carbohydrate	Amino sugar and nucleotide sugar	337	119	37516
	arachidate (20:0)	Lipids	Free fatty acid	498	120	1118
	arginine	Amino acid	Glutamate family (alpha-ketoglutarate derived)	157	121	1638
	asparagine	Amino acid	Aspartate family (OAA derived)	103	122	512
	aspartate	Amino acid	Aspartate family (OAA derived)	104	123	443
	azelate (nonanedioate)	Lipids	Fatty acid, Dicarboxylate	801	124	18362
	beta-alanine	Nucleotide	Pyrimidine metabolism	994	125	55
	beta-hydroxyisovalerate	Amino acid	Branched Chain Amino Acids (pyruvate derived)	236	126	12129
	betaine	Amino acid	Serine family (phosphoglycerate derived)	5	127	3141
	beta-sitosterol	Lipids	Sterols	741	128	27414
	campesterol	Lipids	Sterols	744	129	33997
	caproate (6:0)	Lipids	Free fatty acid	503	130	32489
	caprylate (8:0)	Lipids	Free fatty acid	504	131	32492
	carboxyethyl-GABA	Amino acid	Glutamate family (alpha-ketoglutarate derived)	159	132	40007
	choline	Lipids	Choline metabolism	727	133	15506
	choline phosphate	Lipids	Choline metabolism	728	134	34396
	cis-aconitate	Carbohydrate	TCA cycle	304	135	12025
	cis-urocanate	Amino acid	Glutamate family (alpha-ketoglutarate derived)	193	136	40410
	citramalate	Carbohydrate	C5 branched dibasic acid metabolism	471	137	22158
	citrate	Carbohydrate	TCA cycle	305	138	1564
	citrulline	Amino acid	Glutamate family (alpha-ketoglutarate derived)	160	139	2132
	coniferyl aldehyde	Secondary metabolism	Phenylpropanoids	1495	140	36745
	cys-gly, oxidized	Peptide	Dipeptide	1051	141	18368
	cysteine	Amino acid	Serine family (phosphoglycerate derived)	7	142	31453
	cysteine-glutathione disulfide	Amino acid	Glutathione metabolism	272	143	46734
	cystine	Amino acid	Serine family (phosphoglycerate derived)	9	144	39512
	cytidine	Nucleotide	Pyrimidine metabolism	974	145	514
	cytidine 2',3'-cyclic monophosphate	Nucleotide	Pyrimidine metabolism	978	146	37465
	cytidine 3'-monophosphate (3'-CMP)	Nucleotide	Pyrimidine metabolism	976	147	2959
	cytidine 5'-monophosphate (5'-CMP)	Nucleotide	Pyrimidine metabolism	975	148	2372
	cytosine	Nucleotide	Pyrimidine metabolism	977	149	573
	dehydroascorbate	Cofactors, Prosthetic Groups, Electron Carriers	Ascorbate metabolism	867	150	1659
	deoxycarnitine	Cofactors, Prosthetic Groups, Electron Carriers	Carnitine metabolism	859	151	36747
	dimethylarginine (SDMA + ADMA)	Amino acid	Glutamate family (alpha-ketoglutarate derived)	162	152	36808
	dodecanedioate	Lipids	Fatty acid, Dicarboxylate	803	153	32388
	ectoine	Nucleotide	Pyrimidine metabolism	980	154	35651
	eicosenoate (20:1)	Lipids	Free fatty acid	514	155	33587
	ergosterol	Lipids	Sterols	748	156	27553
	ergothioneine	Amino acid	Glutamate family (alpha-ketoglutarate derived)	163	157	37459
	erythritol	Carbohydrate	Amino sugar and nucleotide sugar	338	158	20699
	erythronate*	Carbohydrate	Amino sugar and nucleotide sugar	339	159	42420
	erythrose	Carbohydrate	Sucrose, glucose,fructose metabolism	400	160	27753
	ethanolamine	Lipids	Choline metabolism	729	161	1497
	ethylmalonate	Lipids	Fatty acid, Dicarboxylate	817	162	15765
	ferulate	Secondary metabolism	Phenylpropanoids	1497	163	35630
	flavin adenine dinucleotide (FAD)	Cofactors, Prosthetic Groups, Electron Carriers	Riboflavin and FAD metabolism	860	164	2134
	flavin mononucleotide (FMN)	Cofactors, Prosthetic Groups, Electron Carriers	Riboflavin and FAD metabolism	862	165	15797
	fructose	Carbohydrate	Sucrose, glucose,fructose metabolism	402	166	48195
	fructose-6-phosphate	Carbohydrate	Glycolysis	288	167	12021
	fucosterol	Lipids	Sterols	752	168	21187
	fumarate	Carbohydrate	TCA cycle	306	169	1643
	galactarate (mucic acid)	Secondary metabolism	Fatty acid and sugar derivatives	1368	170	20881
	galactitol (dulcitol)	Carbohydrate	Sucrose, glucose,fructose metabolism	405	171	1117
	galactonate	Carbohydrate	Sucrose, glucose,fructose metabolism	406	172	27719
	galactose 1-phosphate	Carbohydrate	Sucrose, glucose,fructose metabolism	408	173	15706
	gamma-aminobutyrate (GABA)	Amino acid	Glutamate family (alpha-ketoglutarate derived)	164	174	1416
	gamma-glutamylalanine	Peptide	gamma-glutamyl	1003	175	37063
	gamma-glutamylglutamate	Peptide	gamma-glutamyl	1005	176	36738
	gamma-glutamylglutamine	Peptide	gamma-glutamyl	1006	177	2730
	gamma-glutamylglycine	Peptide	gamma-glutamyl	1007	178	33949
	gamma-glutamylisoleucine*	Peptide	gamma-glutamyl	1009	179	34456
	gamma-glutamylleucine	Peptide	gamma-glutamyl	1010	180	18369
	gamma-glutamylmethionine	Peptide	gamma-glutamyl	1012	181	44872
	gamma-glutamylphenylalanine	Peptide	gamma-glutamyl	1013	182	33422
	gamma-glutamylthreonine*	Peptide	gamma-glutamyl	1014	183	33364
	gamma-glutamyltryptophan	Peptide	gamma-glutamyl	1015	184	33947
	gamma-glutamyltyrosine	Peptide	gamma-glutamyl	1016	185	2734
	gamma-glutamylvaline	Peptide	gamma-glutamyl	1017	186	43829
	gentisic acid-5-glucoside	Secondary metabolism	Phenylpropanoids	1528	187	48729
	glucoheptose	Carbohydrate	Sucrose, glucose,fructose metabolism	412	188	20705
	gluconate	Carbohydrate	Sucrose, glucose,fructose metabolism	468	189	587
	glucosamine-6-phosphate	Carbohydrate	Amino sugar and nucleotide sugar	344	190	580
	glucose	Carbohydrate	Glycolysis	289	191	48152
	glucose 6-phosphate	Carbohydrate	Glycolysis	291	192	31260
	glucuronate	Carbohydrate	Glycolysis	292	193	15443
	glutamate	Amino acid	Glutamate family (alpha-ketoglutarate derived)	165	194	57
	glutamate, gamma-methyl ester	Amino acid	Glutamate family (alpha-ketoglutarate derived)	166	195	33487
	glutamine	Amino acid	Glutamate family (alpha-ketoglutarate derived)	167	196	53
	glutamine-leucine	Peptide	Dipeptide	1194	197	42994
	glutarate (pentanedioate)	Lipids	Fatty acid, Dicarboxylate	813	198	396
	glutathione, oxidized (GSSG)	Amino acid	Glutathione metabolism	274	199	38783
	glutathione, reduced (GSH)	Amino acid	Glutathione metabolism	275	200	2127
	glycerate	Carbohydrate	Photorespiration	329	201	1572
	glycerol	Lipids	Glycerolipids	627	202	15122
	glycerol 3-phosphate	Lipids	Phospholipids	660	203	43847
	glycerophosphoethanolamine	Lipids	Phospholipids	661	204	37455
	glycerophosphoglycerol	Lipids	Glycerolipids	632	205	48857
	glycerophosphoinositol*	Lipids	Phospholipids	705	206	47155
	glycerophosphorylcholine (GPC)	Lipids	Phospholipids	662	207	15990
	glycine	Amino acid	Serine family (phosphoglycerate derived)	11	208	11777
	glycylisoleucine	Peptide	Dipeptide	1064	209	36659
	glycylleucine	Peptide	Dipeptide	1065	210	34398
	glycylvaline	Peptide	Dipeptide	1074	211	18357
	guanine	Nucleotide	Purine metabolism	927	212	32352
	guanosine	Nucleotide	Purine metabolism	928	213	1573
	guanosine 2'-monophosphate (2'-GMP)*	Nucleotide	Purine metabolism	960	214	52442
	guanosine 3'-monophosphate (3'-GMP)	Nucleotide	Purine metabolism	948	215	39786
	guanosine 5'- monophosphate (5'-GMP)	Nucleotide	Purine metabolism	930	216	2849
	guanosine-2',3'-cyclic monophosphate	Nucleotide	Purine metabolism	931	217	37139
	gulonic acid*	Cofactors, Prosthetic Groups, Electron Carriers	Ascorbate metabolism	874	218	46957
	heptanoate (7:0)	Lipids	Free fatty acid	519	219	1644
	histidine	Amino acid	Glutamate family (alpha-ketoglutarate derived)	169	220	59
	homocitrulline	Amino acid	Glutamate family (alpha-ketoglutarate derived)	171	221	22138
	homocysteine	Amino acid	Serine family (phosphoglycerate derived)	13	222	15128
	homoserine	Amino acid	Aspartate family (OAA derived)	107	223	23642
	homoserine lactone	Amino acid	Aspartate family (OAA derived)	108	224	34458
	hydroquinone beta-D-glucopyranoside	Secondary metabolism	Benzenoids	1355	225	38160
	hypoxanthine	Nucleotide	Purine metabolism	933	226	3127
	imidazole propionate	Amino acid	Glutamate family (alpha-ketoglutarate derived)	192	227	40730
	indole-3-carboxylic acid	Hormone metabolism	Auxin metabolism	1296	228	38116
	indoleacetate	Hormone metabolism	Auxin metabolism	1290	229	27513
	inosine	Nucleotide	Purine metabolism	934	230	1123
	inosine 5'-monophosphate (IMP)	Nucleotide	Purine metabolism	935	231	2133
	inositol 1-phosphate (I1P)	Carbohydrate	Inositol metabolism	381	232	1481
	inositol 2-phosphate (I2P)	Carbohydrate	Inositol metabolism	382	233	27725
	isocitrate	Carbohydrate	TCA cycle	307	234	12110
	isoferulate	Secondary metabolism	Phenylpropanoids	1484	235	37450
	isoleucine	Amino acid	Branched Chain Amino Acids (OAA derived)	213	236	1125
	isoleucylglycine	Peptide	Dipeptide	1117	237	40008
	itaconate (methylenesuccinate)	Carbohydrate	C5 branched dibasic acid metabolism	472	238	35962
	jasmonic acid	Hormone metabolism	Jasmonate metabolism	1303	239	35659
	kynurenate	Amino acid	Aromatic amino acid metabolism (PEP derived)	50	240	1417
	kynurenine	Amino acid	Aromatic amino acid metabolism (PEP derived)	51	241	15140
	lactate	Carbohydrate	Glycolysis	294	242	527
	leucine	Amino acid	Branched Chain Amino Acids (pyruvate derived)	237	243	60
	leucylglutamine*	Peptide	Dipeptide	1244	244	48189
	leucylglycine	Peptide	Dipeptide	1099	245	40045
	leucylphenylalanine/isoleucylphenylalanine	Peptide	Dipeptide	1265	246	52415
	levulinate (4-oxovalerate)	Amino acid	Branched Chain Amino Acids (pyruvate derived)	238	247	22177
	lignocerate (24:0)	Lipids	Free fatty acid	524	248	1364
	linoleate (18:2n6)	Lipids	Free fatty acid	526	249	1105
	linolenate [alpha or gamma; (18:3n3 or 6)]	Lipids	Free fatty acid	527	250	34035
	lysine	Amino acid	Aspartate family (OAA derived)	110	251	1301
	lysylleucine	Peptide	Dipeptide	1136	252	40020
	malate	Carbohydrate	TCA cycle	308	253	1303
	maleate	Carbohydrate	TCA cycle	309	254	20676
	malonate	Lipids	Fatty acid, Dicarboxylate	804	255	15872
	maltol	Carbohydrate	Amino sugar and nucleotide sugar	341	256	38299
	maltose	Carbohydrate	Sucrose, glucose,fructose metabolism	420	257	15586
	maltotriose	Carbohydrate	Sucrose, glucose,fructose metabolism	423	258	44688
	mannitol	Carbohydrate	Sucrose, glucose,fructose metabolism	425	259	15335
	mannose-6-phosphate	Carbohydrate	Sucrose, glucose,fructose metabolism	429	260	1469
	mesaconate (methylfumarate)	Carbohydrate	TCA cycle	310	261	18493
	methionine	Amino acid	Aspartate family (OAA derived)	111	262	1302
	methionine sulfone	Amino acid	Aspartate family (OAA derived)	282	263	44878
	methionine sulfoxide	Amino acid	Aspartate family (OAA derived)	112	264	18374
	methyl glucopyranoside (alpha + beta)	Carbohydrate	Sucrose, glucose,fructose metabolism	466	265	46144
	methylphosphate	Cofactors, Prosthetic Groups, Electron Carriers	Oxidative phosphorylation	854	266	37070
	methylsuccinate	Amino acid	Branched Chain Amino Acids (pyruvate derived)	240	267	15745
	mevalonate	Secondary metabolism	Terpenoids	1559	268	39583
	mevalonolactone	Secondary metabolism	Terpenoids	1573	269	48118
	myo-inositol	Carbohydrate	Inositol metabolism	384	270	1124
	N1-methyladenosine	Nucleotide	Purine metabolism	936	271	15650
	N1-methylguanosine	Nucleotide	Purine metabolism	937	272	31609
	N2,N2-dimethylguanosine	Nucleotide	Purine metabolism	939	273	35137
	N2-methylguanosine	Nucleotide	Purine metabolism	940	274	35133
	N6-acetyllysine	Amino acid	Aspartate family (OAA derived)	114	275	36752
	N6-carbamoylthreonyladenosine	Nucleotide	Purine metabolism	923	276	35157
	N6-carboxyethyllysine	Amino acid	Aspartate family (OAA derived)	141	277	37458
	N6-carboxymethyllysine	Amino acid	Aspartate family (OAA derived)	144	278	36713
	N6-methyladenosine	Nucleotide	Purine metabolism	942	279	37114
	N6-succinyladenosine	Nucleotide	Purine metabolism	956	280	48130
	N-6-trimethyllysine	Amino acid	Aspartate family (OAA derived)	115	281	1498
	N-acetylalanine	Amino acid	Aspartate family (OAA derived)	116	282	1585
	N-acetylarginine	Amino acid	Glutamate family (alpha-ketoglutarate derived)	172	283	33953
	N-acetylasparagine	Amino acid	Aspartate family (OAA derived)	117	284	33942
	N-acetylaspartate (NAA)	Amino acid	Aspartate family (OAA derived)	118	285	22185
	N-acetyl-beta-alanine	Amino acid	Aspartate family (OAA derived)	119	286	37432
	N-acetyl-glucosamine 1-phosphate	Carbohydrate	Amino sugar and nucleotide sugar	349	287	15741
	N-acetylglucosamine 6-phosphate	Carbohydrate	Amino sugar and nucleotide sugar	350	288	15107
	N-acetylglutamate	Amino acid	Glutamate family (alpha-ketoglutarate derived)	173	289	15720
	N-acetylglutamine	Amino acid	Glutamate family (alpha-ketoglutarate derived)	174	290	33943
	N-acetylisoleucine	Amino acid	Branched Chain Amino Acids (pyruvate derived)	241	291	33967
	N-acetylleucine	Amino acid	Branched Chain Amino Acids (pyruvate derived)	242	292	1587
	N-acetylmethionine	Amino acid	Aspartate family (OAA derived)	120	293	1589
	N-acetylphenylalanine	Amino acid	Aromatic amino acid metabolism (PEP derived)	53	294	33950
	N-acetylproline	Amino acid	Glutamate family (alpha-ketoglutarate derived)	177	295	34387
	N-acetylputrescine	Amino acid	Amines and polyamines	269	296	37496
	N-acetylserine	Amino acid	Serine family (phosphoglycerate derived)	17	297	37076
	N-acetyltaurine	Amino acid	Serine family (phosphoglycerate derived)	28	298	48187
	N-acetylthreonine	Amino acid	Aspartate family (OAA derived)	121	299	33939
	N-acetyltyrosine	Amino acid	Aromatic amino acid metabolism (PEP derived)	56	300	32390
	N-acetylvaline	Amino acid	Branched Chain Amino Acids (pyruvate derived)	243	301	1591
	naringenin	Secondary metabolism	Flavonoids	1414	302	44663
	N-delta-acetylornithine	Amino acid	Glutamate family (alpha-ketoglutarate derived)	198	303	43249
	N-formylmethionine	Amino acid	Aspartate family (OAA derived)	122	304	2829
	N-formylphenylalanine	Amino acid	Aromatic amino acid metabolism (PEP derived)	90	305	48433
	nicotianamine	Amino acid	Amines and polyamines	270	306	43026
	nicotinamide	Cofactors, Prosthetic Groups, Electron Carriers	Nicotinate and nicotinamide metabolism	830	307	594
	nicotinamide adenine dinucleotide (NAD+)	Cofactors, Prosthetic Groups, Electron Carriers	Nicotinate and nicotinamide metabolism	831	308	44685
	nicotinamide ribonucleotide (NMN)	Cofactors, Prosthetic Groups, Electron Carriers	Nicotinate and nicotinamide metabolism	835	309	22152
	nicotinamide riboside	Cofactors, Prosthetic Groups, Electron Carriers	Nicotinate and nicotinamide metabolism	836	310	33013
	nicotinate	Cofactors, Prosthetic Groups, Electron Carriers	Nicotinate and nicotinamide metabolism	837	311	1504
	nicotinate ribonucleoside	Cofactors, Prosthetic Groups, Electron Carriers	Nicotinate and nicotinamide metabolism	839	312	33471
	N-methylglutamate	Amino acid	Glutamate family (alpha-ketoglutarate derived)	190	313	31532
	N-methylleucine	Amino acid	Branched Chain Amino Acids (pyruvate derived)	244	314	35666
	N-methylphenylalanine	Amino acid	Aromatic amino acid metabolism (PEP derived)	80	315	42999
	N-methylpipecolate	Amino acid	Aspartate family (OAA derived)	143	316	47101
	N-methylproline	Amino acid	Glutamate family (alpha-ketoglutarate derived)	185	317	37431
	N-monomethylarginine	Amino acid	Glutamate family (alpha-ketoglutarate derived)	202	318	43586
	norophthalmate*	Amino acid	Glutathione metabolism	278	319	39251
	norvaline	Amino acid	Branched Chain Amino Acids (pyruvate derived)	225	320	37426
	O-acetylserine	Amino acid	Serine family (phosphoglycerate derived)	19	321	15947
	oleate (18:1n9)	Lipids	Free fatty acid	536	322	1359
	oleic ethanolamide	Lipids	Fatty acid amide	573	323	38102
	O-methyl tyrosine	Amino acid	Aromatic amino acid metabolism (PEP derived)	93	324	37451
	ophthalmate	Amino acid	Glutathione metabolism	276	325	34592
	ornithine	Amino acid	Glutamate family (alpha-ketoglutarate derived)	178	326	1493
	orotate	Nucleotide	Pyrimidine metabolism	982	327	1505
	O-sulfo-L-tyrosine	Amino acid	Aromatic amino acid metabolism (PEP derived)	82	328	45413
	o-Tyrosine	Amino acid	Aromatic amino acid metabolism (PEP derived)	88	329	43392
	oxalate (ethanedioate)	Carbohydrate	Photorespiration	325	330	20694
	palmitate (16:0)	Lipids	Free fatty acid	538	331	1336
	pantothenate	Cofactors, Prosthetic Groups, Electron Carriers	CoA metabolism	825	332	1508
	phenethylamine	Amino acid	Aromatic amino acid metabolism (PEP derived)	59	333	12142
	phenylalanine	Amino acid	Aromatic amino acid metabolism (PEP derived)	62	334	64
	phenylalanylalanine	Peptide	Dipeptide	1033	335	41374
	phenylalanylglycine	Peptide	Dipeptide	1168	336	41370
	phenyllactate (PLA)	Amino acid	Aromatic amino acid metabolism (PEP derived)	63	337	22130
	phenylpyruvate	Amino acid	Aromatic amino acid metabolism (PEP derived)	64	338	566
	phosphate	Cofactors, Prosthetic Groups, Electron Carriers	Oxidative phosphorylation	855	339	42109
	phosphoethanolamine	Lipids	Phospholipids	669	340	1600
	phosphopantetheine	Cofactors, Prosthetic Groups, Electron Carriers	CoA metabolism	826	341	15504
	p-hydroxybenzaldehyde	Secondary metabolism	Benzenoids	1358	342	17665
	phytosphingosine	Lipids	Sphingolipid	736	343	1510
	pimelate (heptanedioate)	Lipids	Fatty acid, Dicarboxylate	805	344	15704
	pipecolate	Amino acid	Aspartate family (OAA derived)	124	345	1444
	proline	Amino acid	Glutamate family (alpha-ketoglutarate derived)	179	346	1898
	prolylglycine	Peptide	Dipeptide	1058	347	40703
	pseudouridine	Nucleotide	Pyrimidine metabolism	984	348	33442
	putrescine	Amino acid	Amines and polyamines	263	349	1408
	pyridoxal	Cofactors, Prosthetic Groups, Electron Carriers	Vitamin B metabolism (B6 or B12)	890	350	1651
	pyridoxate	Cofactors, Prosthetic Groups, Electron Carriers	Vitamin B metabolism (B6 or B12)	893	351	31555
	pyridoxine (Vitamin B6)	Cofactors, Prosthetic Groups, Electron Carriers	Vitamin B metabolism (B6 or B12)	894	352	608
	pyroglutamine*	Amino acid	Glutamate family (alpha-ketoglutarate derived)	180	353	46225
	pyruvate	Carbohydrate	Glycolysis	298	354	22250
	quinate	Amino acid	Aromatic amino acid metabolism (PEP derived)	66	355	18335
	raffinose	Carbohydrate	Sucrose, glucose,fructose metabolism	437	356	586
	rhamnose	Carbohydrate	Sucrose, glucose,fructose metabolism	438	357	15826
	ribitol	Carbohydrate	Amino sugar and nucleotide sugar	353	358	15772
	riboflavin (Vitamin B2)	Cofactors, Prosthetic Groups, Electron Carriers	Riboflavin and FAD metabolism	861	359	1827
	ribonate	Carbohydrate	Amino sugar and nucleotide sugar	354	360	27731
	ribose	Carbohydrate	Amino sugar and nucleotide sugar	355	361	1471
	ribose 1-phosphate	Carbohydrate	Calvin cycle and pentose phosphate	323	362	1763
	ribose 5-phosphate	Carbohydrate	Calvin cycle and pentose phosphate	318	363	561
	ribulose	Carbohydrate	Amino sugar and nucleotide sugar	357	364	35855
	ribulose/xylulose 5-phosphate	Carbohydrate	Amino sugar and nucleotide sugar	345	365	37288
	saccharopine	Amino acid	Aspartate family (OAA derived)	127	366	1495
	S-adenosylhomocysteine (SAH)	Amino acid	Aspartate family (OAA derived)	128	367	42382
	S-adenosylmethionine (SAM)	Amino acid	Aspartate family (OAA derived)	129	368	15915
	salicylate	Secondary metabolism	Benzenoids	1362	369	1515
	S-carboxymethyl-L-cysteine	Amino acid	Serine family (phosphoglycerate derived)	24	370	47897
	sebacate (decanedioate)	Lipids	Fatty acid, Dicarboxylate	806	371	32398
	serine	Amino acid	Serine family (phosphoglycerate derived)	20	372	1648
	serotonin	Amino acid	Aromatic amino acid metabolism (PEP derived)	67	373	2342
	shikimate	Amino acid	Aromatic amino acid metabolism (PEP derived)	68	374	15144
	sinapoyl aldehyde	Secondary metabolism	Phenylpropanoids	1504	375	36773
	S-methylcysteine	Amino acid	Serine family (phosphoglycerate derived)	23	376	39592
	S-methylglutathione	Amino acid	Glutathione metabolism	277	377	33944
	S-methylmethionine	Amino acid	Serine family (phosphoglycerate derived)	22	378	38127
	sorbitol	Carbohydrate	Sucrose, glucose,fructose metabolism	440	379	15053
	spermidine	Amino acid	Amines and polyamines	264	380	485
	sphinganine	Lipids	Sphingolipid	737	381	17769
	sphingosine	Lipids	Sphingolipid	738	382	17747
	stachydrine	Amino acid	Glutamate family (alpha-ketoglutarate derived)	182	383	34384
	stigmasterol	Lipids	Sterols	753	384	21183
	suberate (octanedioate)	Lipids	Fatty acid, Dicarboxylate	807	385	15730
	succinate	Carbohydrate	TCA cycle	312	386	1437
	succinimide	Xenobiotics	Chemicals	1642	387	41888
	sucrose	Carbohydrate	Sucrose, glucose,fructose metabolism	444	388	1519
	sucrose-6-phosphate	Carbohydrate	Sucrose, glucose,fructose metabolism	465	389	46735
	sulfate*	Amino acid	Serine family (phosphoglycerate derived)	29	390	46960
	syringaldehyde	Secondary metabolism	Phenylpropanoids	1506	391	37449
	syringic acid	Secondary metabolism	Phenylpropanoids	1518	392	37091
	tartronate (hydroxymalonate)	Carbohydrate	Photorespiration	331	393	20693
	taurine	Amino acid	Serine family (phosphoglycerate derived)	21	394	2125
	thiamin (Vitamin B1)	Cofactors, Prosthetic Groups, Electron Carriers	Thiamine metabolism	881	395	5341
	threitol	Carbohydrate	Amino sugar and nucleotide sugar	358	396	35854
	threonate	Cofactors, Prosthetic Groups, Electron Carriers	Ascorbate metabolism	873	397	27738
	threonine	Amino acid	Aspartate family (OAA derived)	130	398	1284
	threonylphenylalanine	Peptide	Dipeptide	1125	399	31530
	thymidine	Nucleotide	Pyrimidine metabolism	985	400	2183
	thymidine 3'-monophosphate	Nucleotide	Pyrimidine metabolism	1001	401	37122
	thymidine 5'-monophosphate	Nucleotide	Pyrimidine metabolism	986	402	12023
	trans-4-hydroxyproline	Amino acid	Glutamate family (alpha-ketoglutarate derived)	184	403	32306
	trans-aconitate	Carbohydrate	TCA cycle	313	404	27741
	trans-urocanate	Amino acid	Glutamate family (alpha-ketoglutarate derived)	187	405	607
	trigonelline (N'-methylnicotinate)	Cofactors, Prosthetic Groups, Electron Carriers	Nicotinate and nicotinamide metabolism	840	406	32401
	tryptamine	Amino acid	Aromatic amino acid metabolism (PEP derived)	83	407	6104
	tryptophan	Amino acid	Aromatic amino acid metabolism (PEP derived)	69	408	54
	tyramine	Amino acid	Aromatic amino acid metabolism (PEP derived)	85	409	1603
	tyrosine	Amino acid	Aromatic amino acid metabolism (PEP derived)	71	410	1299
	UDP-glucose (isobar with UDP-galactose)	Carbohydrate	Amino sugar and nucleotide sugar	356	411	38670
	UDP-N-acetylgalactosamine	Carbohydrate	Amino sugar and nucleotide sugar	378	412	18396
	UDP-N-acetylglucosamine	Carbohydrate	Amino sugar and nucleotide sugar	361	413	35162
	undecanedioate	Lipids	Fatty acid, Dicarboxylate	809	414	42395
	uracil	Nucleotide	Pyrimidine metabolism	988	415	605
	urate	Nucleotide	Purine metabolism	943	416	1604
	uridine	Nucleotide	Pyrimidine metabolism	989	417	606
	uridine 2'-monophosphate (2'-UMP)*	Nucleotide	Pyrimidine metabolism	1002	418	52444
	uridine 3'-monophosphate (3'-UMP)	Nucleotide	Pyrimidine metabolism	997	419	39764
	uridine 5'-diphosphate (UDP)	Nucleotide	Pyrimidine metabolism	990	420	5345
	uridine 5'-monophosphate (UMP)	Nucleotide	Pyrimidine metabolism	991	421	2856
	uridine-2',3'-cyclic monophosphate	Nucleotide	Pyrimidine metabolism	992	422	37137
	valine	Amino acid	Branched Chain Amino Acids (pyruvate derived)	246	423	1649
	valylglutamine	Peptide	Dipeptide	1186	424	42079
	valylglycine	Peptide	Dipeptide	1019	425	40475
	valylleucine	Peptide	Dipeptide	1143	426	39994
	vanillate	Secondary metabolism	Phenylpropanoids	1527	427	35639
	vanillin	Secondary metabolism	Phenylpropanoids	1508	428	37442
	xanthine	Nucleotide	Purine metabolism	944	429	3147
	xanthosine	Nucleotide	Purine metabolism	945	430	15136
	xylitol	Carbohydrate	Amino sugar and nucleotide sugar	362	431	4966
	xylonate	Carbohydrate	Amino sugar and nucleotide sugar	363	432	35638
	xylose	Carbohydrate	Amino sugar and nucleotide sugar	364	433	15581
	xylulose	Carbohydrate	Amino sugar and nucleotide sugar	365	434	18344
