# Supplementary material for: Antioxidant Metabolism Underlies Different Metabolic Strategies for Primary Root Growth Maintenance under Water Stress in Cotton and Maize
Source: Antioxidants (Basel). 2022 Apr 22;11(5):820. doi: 10.3390/antiox11050820 (PMC9137980; doi:10.3390/antiox11050820)
Supplement: Supplementary file 1 [file antioxidants-11-00820-s001.zip › Supplementary Data S2.xlsx]

## Sheet: List of metabolites in Fig 4A
Supplementary Data S2. List 1: Identities of metabolites changing in abundance in R1 and R2 of the elongation zone of water-stressed (WS) compared with well-watered (WW) cotton primary roots as presented in Figure 4A. Each column presents number and names of the metabolites from the given category in Figure 4A.
Category	WS R1 / WW R1 WS R2 / WW R2 WS R2 / WW R3	WS R1 / WW R1 WS R2 / WW R2	WS R1 / WW R1 WS R2 / WW R3	WS R2 / WW R2 WS R2 / WW R3	WS R1 / WW R1	WS R2 / WW R2	WS R2 / WW R3
Number of Metabolites	114	21	16	52	25	28	19
	1-methylhistidine	1-linoleoyl-GPE (18:2)	3-ureidopropionate	1-oleoyl-GPC (18:1)	1-oleoyl-GPG (18:1)	13-HODE + 9-HODE	3-hydroxy-3-methylglutarate
	1-oleoyl-GPA (18:1)	1-linoleoyl-GPI (18:2)	4-guanidinobutanoate	1-palmitoyl-2-linoleoyl-GPE (16:0/18:2)	2'-deoxyinosine	1-linoleoyl-GPC (18:2)	4-acetamidobutanoate
	1-oleoyl-GPE (18:1)	1-palmitoyl-GPE (16:0)	5-methyluridine (ribothymidine)	1-palmitoyl-2-oleoyl-GPE (16:0/18:1)	aconitate [cis or trans]	1-oleoyl-2-linoleoyl-GPI (18:1/18:2)	asparagine
	1-palmitoyl-GPA (16:0)	2'-deoxycytidine	adenosine 2'-monophosphate (2'-AMP)	1-palmitoyl-GPI (16:0)	adipate	1-palmitoyl-2-linoleoyl-GPI (16:0/18:2)	choline phosphate
	1-palmitoyl-GPG (16:0)	2'-deoxyguanosine 5'-monophosphate (dGMP)	cys-gly, oxidized	2-hydroxy-3-methylvalerate	citrate	1-palmitoyl-2-oleoyl-GPC (16:0/18:1)	dimethylarginine (SDMA + ADMA)
	2,3-dihydroxyisovalerate	3-methoxytyrosine	ferulate	2-hydroxyglutarate	cytidine 3'-monophosphate (3'-CMP)	1-palmitoyl-GPC (16:0)	fucosterol
	2-aminoadipate	5-methyl-2'-deoxycytidine	gamma-glutamylmethionine	3-methyl-2-oxobutyrate	glucose 6-phosphate	2'-O-methyladenosine	gamma-glutamylisoleucine
	2-aminoheptanoate	galactonate	glutaminylleucine	3-methyl-2-oxovalerate	guanine	4-hydroxyphenylpyruvate	gamma-glutamylthreonine
	2'-deoxyadenosine	gamma-glutamylglutamate	glutarate (pentanedioate)	4-methyl-2-oxopentanoate	inositol 1-phosphate (I1P)	acetylphosphate	glycerophosphoglycerol
	2'-deoxyadenosine 5'-monophosphate	glutamate	leucylglycine	6-oxopiperidine-2-carboxylate	isocitrate	alpha-hydroxyisocaproate	isoleucylglycine
	2'-deoxycytidine 5'-monophosphate	homoserine lactone	N-acetylglutamate	agmatine	lactate	cystine	lysylleucine
	2'-deoxyguanosine	kynurenate	nicotianamine	alanylleucine	leucine	cytosine	N-acetylaspartate (NAA)
	2-hydroxyadipate	mannitol/sorbitol	ophthalmate	allantoic acid	mannose-6-phosphate	erythronate	N-acetylleucine
	2-isopropylmalate	methylphosphate	pyridoxine (Vitamin B6)	allantoin	methionine	fructose-6-phosphate	phenylalanylalanine
	3-(4-hydroxyphenyl)lactate	N1-methylguanosine	serine	alpha-tocopherol	methionine sulfoxide	galactose 1-phosphate	phenylalanylglycine
	3-deoxyoctulosonate	N6-methyladenosine	xanthine	arginine	N1-methyladenosine	gamma-glutamylalanine	phosphate
	3-hydroxybutyrate (BHBA)	N6-succinyladenosine		cytidine 2',3'-cyclic monophosphate	N2-methylguanosine	gamma-glutamylphenylalanine	threonylphenylalanine
	3-methylhistidine	N-acetylalanine		fumarate	N6-carbamoylthreonyladenosine	glutamate, gamma-methyl ester	valylglutamine
	4-hydroxycinnamate	N-acetylglucosamine 6-phosphate		gamma-glutamylglutamine	N-acetyltaurine	glycylisoleucine	valylleucine
	5-methylcytidine	orotate		gamma-glutamyltryptophan	N-delta-acetylornithine	glycylvaline
	5-methylthioadenosine (MTA)	stigmasterol		gamma-glutamyltyrosine	pseudouridine	guanosine-2',3'-cyclic monophosphate
	5-oxoproline			glycerophosphoethanolamine	pyruvate	N-acetylisoleucine
	7-methylguanosine			glycerophosphoinositol	suberate (octanedioate)	nicotinamide
	adenine			glycine	trans-4-hydroxyproline	N-methylglutamate
	adenosine			glycylleucine	uridine 2'-monophosphate (2'-UMP)	prolylglycine
	adenosine 3'-monophosphate (3'-AMP)			hypoxanthine		ribitol
	adenosine 5'-monophosphate (AMP)			indoleacetate		tyrosine
	adenosine-2',3'-cyclic monophosphate			inosine		urate
	alanine			linoleate (18:2n6)
	alpha-hydroxyisovalerate			malate
	arabonate/xylonate			maleate
	aspartate			maltose
	azelate (nonanedioate)			methyl glucopyranoside (alpha + beta)
	beta-alanine			N2,N2-dimethylguanosine
	beta-hydroxyisovalerate			N-acetylasparagine
	betaine			N-acetylglutamine
	carboxyethyl-GABA			N-acetylmethionine
	choline			N-acetylphenylalanine
	cysteine-glutathione disulfide			N-acetylputrescine
	cytidine 5'-monophosphate (5'-CMP)			N-formylmethionine
	deoxycarnitine			phenylpyruvate
	ethanolamine			phytosphingosine
	flavin adenine dinucleotide (FAD)			pyridoxate
	flavin mononucleotide (FMN)			spermidine
	fructose			sphinganine
	galactinol			sulfate
	gamma-aminobutyrate (GABA)			tryptophan
	gamma-glutamylleucine			uridine 5'-monophosphate (UMP)
	glucose			uridine-2',3'-cyclic monophosphate
	glucuronate			valylglycine
	glutamine			vanillate
	glutathione, oxidized (GSSG)			xylose
	glutathione, reduced (GSH)
	glycerophosphorylcholine (GPC)
	guanosine
	guanosine 3'-monophosphate (3'-GMP)
	guanosine 5'- monophosphate (5'-GMP)
	histidine
	homocitrulline
	hydroquinone beta-D-glucopyranoside
	inosine 5'-monophosphate (IMP)
	linolenate [alpha or gamma; (18:3n3 or 6)]
	lysine
	malonate
	methylsuccinate
	myo-inositol
	N6-acetyllysine
	N-acetylarginine
	N-acetyl-beta-alanine
	N-acetylproline
	N-acetylserine
	N-formylphenylalanine
	nicotinamide adenine dinucleotide (NAD+)
	nicotinate
	nicotinate ribonucleoside
	N-methylpipecolate
	N-methylproline
	N-monomethylarginine
	oxalate (ethanedioate)
	phenylalanine
	phosphoethanolamine
	pimelate (heptanedioate)
	pipecolate
	proline
	putrescine
	pyridoxal
	pyroglutamine
	quinate
	raffinose
	riboflavin (Vitamin B2)
	ribose
	saccharopine
	S-adenosylhomocysteine (SAH)
	S-adenosylmethionine (SAM)
	S-carboxymethyl-L-cysteine
	shikimate
	S-methylglutathione
	sphingosine
	stachydrine
	succinate
	sucrose
	taurine
	thiamin (Vitamin B1)
	threonate
	thymidine
	thymidine 5'-monophosphate
	trigonelline (N'-methylnicotinate)
	tryptamine
	tyramine
	UDP-N-acetylgalactosamine
	UDP-N-acetylglucosamine
	uracil
	uridine
	xanthosine

## Sheet: List of metabolites in Fig 4B
Supplementary Data S2. List 2: Identities of metabolites changing in abundance in R1 and R2 of the elongation zone of water-stressed (WS) compared with well-watered (WW) maize primary roots as presented in Figure 4B. Each column presents number and names of the metabolites from the given category in Figure 4B.
Category	WS R1 / WW R1 WS R2 / WW R2 WS R2 / WW R3	WS R1 / WW R1 WS R2 / WW R2	WS R1 / WW R1 WS R2 / WW R3	WS R2 / WW R2 WS R2 / WW R3	WS R1 / WW R1	WS R2 / WW R2	WS R2 / WW R3
Number of Metabolites	98	38	14	41	56	27	27
	1,3-diaminopropane	1-oleoyl-2-linoleoyl-GPI (18:1/18:2)	1-palmitoyl-2-linoleoyl-GPC (16:0/18:2)	1-palmitoyl-GPG (16:0)	1-linoleoyl-GPI (18:2)	1-palmitoyl-2-linoleoyl-GPI (16:0/18:2)	1-palmitoyl-GPC (16:0)
	1-kestose	2'-deoxycytidine	1-palmitoyl-2-oleoyl-GPC (16:0/18:1)	1-palmitoyl-GPI (16:0)	1-oleoylglycerol (18:1)	2'-deoxyadenosine 5'-monophosphate	1-palmitoyl-GPE (16:0)
	2-aminoadipate	2'-deoxycytidine 5'-monophosphate	2'-deoxyadenosine 3'-monophosphate	2,3-dihydroxyisovalerate	1-oleoyl-GPA (18:1)	2'-deoxyguanosine 5'-monophosphate (dGMP)	2-linoleoylglycerol (18:2)
	2-piperidinone	2'-deoxyguanosine	2'-O-methyladenosine	2-methylcitrate/homocitrate	1-oleoyl-GPE (18:1)	2-isopropylmalate	3-ureidopropionate
	3,4-dimethoxycinnamic acid	2-dimethylaminoethanol	adenosine 3'-monophosphate (3'-AMP)	2-oxindole-3-acetate	1-oleoyl-GPG (18:1)	3-hydroxyindolin-2-one	5,6-dihydrouracil
	3-hydroxy-3-methylglutarate	3-hydroxyisobutyrate	glutathione, oxidized (GSSG)	2-pyrrolidinone	1-oleoyl-GPI (18:1)	adenosine 5'-monophosphate (AMP)	7-methylguanosine
	3-methyl-2-oxobutyrate	4-acetamidobutanoate	maltotriose	3-(4-hydroxyphenyl)lactate	1-palmitoyl-2-arachidonoyl-GPC (16:0/20:4)	arabonate	agmatine
	4-hydroxy-2-oxoglutaric acid	4-hydroxycinnamate	methylsuccinate	4-hydroxyphenylpyruvate	1-palmitoyl-2-oleoyl-GPE (16:0/18:1)	ethanolamine	alpha-hydroxycaproate
	5-oxoproline	4-methyl-2-oxopentanoate	N6-carboxyethyllysine	acetylphosphate	1-palmitoylglycerol (16:0)	flavin mononucleotide (FMN)	beta-sitosterol
	6-oxopiperidine-2-carboxylic acid	5-methyl-2'-deoxycytidine	N-acetylproline	adenosine 2'-monophosphate (2'-AMP)	2'-deoxyadenosine	gluconate	choline
	adenosine	allo-threonine	N-acetylthreonine	adenosine-2',3'-cyclic monophosphate	2'-deoxyguanosine 3'-monophosphate	glucosamine-6-phosphate	galactonate
	adipate	arginine	N-methylpipecolate	azelate (nonanedioate)	2-hydroxypalmitate	glucose 6-phosphate	gamma-glutamylglutamate
	allantoic acid	beta-alanine	S-methylmethionine	cytidine 2',3'-cyclic monophosphate	2-hydroxystearate	glutarate (pentanedioate)	glycine
	allantoin	carboxyethyl-GABA	tyramine	cytidine 3'-monophosphate (3'-CMP)	2-methylglutarate	glycerate	isoleucine
	alpha-ketoglutarate	coniferyl aldehyde		ergosterol	2-palmitoylglycerol (16:0)	hypoxanthine	isoleucylglycine
	asparagine	cytidine 5'-monophosphate (5'-CMP)		fructose-6-phosphate	3-aminoisobutyrate	lysine	leucylglycine
	beta-hydroxyisovalerate	eicosenoate (20:1)		gamma-glutamylalanine	3-hydroxy-2-ethylpropionate	maltose	N1-methylguanosine
	campesterol	galactose 1-phosphate		gamma-glutamylphenylalanine	4-hydroxy-nonenal-glutathione	methylphosphate	N-acetylmethionine
	cis-aconitate	glutathione, reduced (GSH)		glucuronate	alanylleucine	N1-methyladenosine	O-sulfo-L-tyrosine
	citrate	guanosine		guanosine 2'-monophosphate (2'-GMP)	allo-isoleucine	N-acetylisoleucine	oxalate (ethanedioate)
	cys-gly, oxidized	guanosine 5'- monophosphate (5'-GMP)		guanosine 3'-monophosphate (3'-GMP)	alpha-hydroxyisovalerate	N-acetyltyrosine	putrescine
	cytidine	inosine 5'-monophosphate (IMP)		guanosine-2',3'-cyclic monophosphate	arachidate (20:0)	N-acetylvaline	rhamnose
	cytosine	leucylphenylalanine/isoleucylphenylalanine		homoserine	aspartate	S-methylcysteine	ribose
	dimethylarginine (SDMA + ADMA)	maleate		homoserine lactone	cysteine	thymidine 5'-monophosphate	tartronate (hydroxymalonate)
	dodecanedioate	N-6-trimethyllysine		leucine	erythrose	UDP-N-acetylgalactosamine	UDP-glucose (isobar with UDP-galactose)
	ectoine	N-acetyl-beta-alanine		mannose-6-phosphate	ethylmalonate	uridine 5'-monophosphate (UMP)	uridine 5'-diphosphate (UDP)
	fructose	N-acetylglucosamine 6-phosphate		mesaconate (methylfumarate)	flavin adenine dinucleotide (FAD)	valylglutamine	valine
	fucosterol	N-acetylglutamate		methionine	gamma-glutamylglutamine
	galactarate (mucic acid)	N-acetylserine		N-acetylleucine	gamma-glutamylglycine
	gamma-aminobutyrate (GABA)	nicotinamide ribonucleotide (NMN)		N-acetylphenylalanine	glucoheptose
	gamma-glutamylthreonine	phenyllactate (PLA)		nicotinate	glutamate
	gamma-glutamyltryptophan	pyridoxal		phenylalanine	glycerol
	glucose	ribulose		quinate	heptanoate (7:0)
	glutamine	succinate		ribulose/xylulose 5-phosphate	homocitrulline
	glycerol 3-phosphate	threonylphenylalanine		S-adenosylmethionine (SAM)	leucylglutamine
	glycerophosphoethanolamine	tryptophan		thiamin (Vitamin B1)	levulinate (4-oxovalerate)
	glycerophosphoglycerol	UDP-N-acetylglucosamine		tyrosine	malate
	glycerophosphoinositol	uridine		uridine 2'-monophosphate (2'-UMP)	malonate
	glycerophosphorylcholine (GPC)			uridine 3'-monophosphate (3'-UMP)	methyl glucopyranoside (alpha + beta)
	gulonic acid			uridine-2',3'-cyclic monophosphate	N6-carboxymethyllysine
	histidine			xanthine	N-acetylputrescine
	homocysteine				nicotinamide
	inosine				nicotinamide adenine dinucleotide (NAD+)
	itaconate (methylenesuccinate)				nicotinate ribonucleoside
	maltol				norophthalmate
	methionine sulfoxide				ornithine
	mevalonate				orotate
	mevalonolactone				palmitate (16:0)
	myo-inositol				phosphopantetheine
	N2,N2-dimethylguanosine				pimelate (heptanedioate)
	N6-acetyllysine				sphingosine
	N-acetylasparagine				threonine
	N-acetylaspartate (NAA)				thymidine
	N-acetylglutamine				thymidine 3'-monophosphate
	N-acetyltaurine				trigonelline (N'-methylnicotinate)
	N-formylmethionine				tryptamine
	N-formylphenylalanine
	nicotianamine
	nicotinamide riboside
	N-methylglutamate
	N-methylleucine
	N-methylphenylalanine
	N-methylproline
	norvaline
	O-acetylserine
	oleate (18:1n9)
	O-methyl tyrosine
	phenylalanylalanine
	phenylpyruvate
	phosphoethanolamine
	pipecolate
	proline
	pyruvate
	raffinose
	riboflavin (Vitamin B2)
	ribonate
	ribose 1-phosphate
	ribose 5-phosphate
	saccharopine
	S-carboxymethyl-L-cysteine
	serine
	shikimate
	S-methylglutathione
	sphinganine
	stigmasterol
	succinimide
	sucrose
	sucrose-6-phosphate
	sulfate
	taurine
	threonate
	trans-4-hydroxyproline
	trans-aconitate
	urate
	vanillate
	xanthosine
	xylitol
	xylulose

## Sheet: List of metabolites in Fig 4C
Supplementary Data S2. List 3: Comparison of water stress-induced changes in metabolite abundance in R1 and R2 of the elongation zone between cotton and maize primary roots as presented in Figure 4C. Each column presents number and names of the metabolites from the given category in Figure 4C.
Category	Cotton R1 Cotton R2 Maize R1 Maize R2	Cotton R1 Cotton R2 Maize R1	Cotton R1 Cotton R2 Maize R2	Cotton R1 Maize R1 Maize R2	Cotton R2 Maize R1 Maize R2	Cotton R1 Cotton R2	Cotton R1 Maize R1	Cotton R1 Maize R2	Cotton R2 Maize R1	Cotton R2 Maize R2	Maize R1 Maize R2	Cotton R1	Cotton R2	Maize R1	Maize R2
Number of Metabolites	27	37	12	10	15	38	9	9	10	4	46	34	23	52	16
	2-aminoadipate	1-oleoyl-GPA (18:1)	1-palmitoyl-GPG (16:0)	adipate	3-methyl-2-oxobutyrate	1-methylhistidine	1-linoleoyl-GPI (18:2)	adenosine 2'-monophosphate (2'-AMP)	1-palmitoyl-2-oleoyl-GPE (16:0/18:1)	1-palmitoyl-GPI (16:0)	1,3-diaminopropane	1-linoleoyl-GPE (18:2)	1-oleoyl-GPC (18:1)	1-oleoyl-2-linoleoyl-GPI (18:1/18:2)	2-methylcitrate
	5-oxoproline	1-oleoyl-GPE (18:1)	2,3-dihydroxyisovalerate	citrate	allantoic acid	1-palmitoyl-GPA (16:0)	1-oleoyl-GPG (18:1)	cytidine 3'-monophosphate (3'-CMP)	4-methyl-2-oxopentanoate	cytidine 2',3'-cyclic monophosphate	1-kestose	1-palmitoyl-GPE (16:0)	1-palmitoyl-2-linoleoyl-GPE (16:0/18:2)	1-oleoylglycerol (18:1)	2-oxindole-3-acetate
	adenosine	2'-deoxyadenosine	3-(4-hydroxyphenyl)lactate	cys-gly, oxidized	allantoin	2-aminoheptanoate	2'-deoxycytidine	homoserine lactone	alanylleucine	N-acetylphenylalanine	2-piperidinone	2'-deoxyguanosine 5'-monophosphate (dGMP)	2-hydroxyglutarate	1-oleoyl-GPI (18:1)	2-pyrrolidinone
	beta-hydroxyisovalerate	2'-deoxycytidine 5'-monophosphate	adenosine-2',3'-cyclic monophosphate	methionine sulfoxide	gamma-glutamyltryptophan	2'-deoxyadenosine 5'-monophosphate	5-methyl-2'-deoxycytidine	leucine	arginine	uridine-2',3'-cyclic monophosphate	3,4-dimethoxycinnamic acid	2'-deoxyinosine	3-methyl-2-oxovalerate	1-palmitoyl-2-arachidonoyl-GPC (16:0/20:4)	4-hydroxyphenylpyruvate
	fructose	2'-deoxyguanosine	azelate (nonanedioate)	N-acetyltaurine	glycerophosphoethanolamine	2-hydroxyadipate	beta-alanine	mannose-6-phosphate	gamma-glutamylglutamine		3-hydroxy-3-methylglutarate	3-methoxytyrosine	6-oxopiperidine-2-carboxylate	1-palmitoyl-2-linoleoyl-GPC (16:0/18:2)	acetylphosphate
	gamma-aminobutyrate (GABA)	2-methylglutarate	glucuronate	nicotianamine	glycerophosphoinositol	2-isopropylmalate	glutamate	methionine	malate		4-hydroxy-2-oxoglutaric acid	3-ureidopropionate	agmatine	1-palmitoyl-2-oleoyl-GPC (16:0/18:1)	ergosterol
	glucose	4-hydroxycinnamate	guanosine 3'-monophosphate (3'-GMP)	pyruvate	inosine	3-deoxyoctulosonate	N-acetylglucosamine 6-phosphate	tyrosine	maleate		6-oxopiperidine-2-carboxylic acid	4-guanidinobutanoate	alpha-tocopherol	1-palmitoylglycerol (16:0)	fructose-6-phosphate
	glutamine	adenosine 3'-monophosphate (3'-AMP)	nicotinate	serine	N2,N2-dimethylguanosine	3-hydroxybutyrate (BHBA)	N-acetylglutamate	uridine 2'-monophosphate (2'-UMP)	methyl glucopyranoside (alpha + beta)		alpha-ketoglutarate	5-methyluridine (ribothymidine)	fumarate	2'-deoxyadenosine 3'-monophosphate	gamma-glutamylalanine
	glycerophosphorylcholine (GPC)	alpha-hydroxyisovalerate	phenylalanine	stigmasterol	N-acetylasparagine	3-methylhistidine	orotate	xanthine	N-acetylputrescine		asparagine	ferulate	gamma-glutamyltyrosine	2'-deoxyguanosine 3'-monophosphate	gamma-glutamylphenylalanine
	histidine	aspartate	quinate	trans-4-hydroxyproline	N-acetylglutamine	5-methylcytidine			tryptophan		campesterol	galactonate	glycine	2-dimethylaminoethanol	guanosine 2'-monophosphate (2'-GMP)
	myo-inositol	carboxyethyl-GABA	S-adenosylmethionine (SAM)		N-formylmethionine	5-methylthioadenosine (MTA)					cis-aconitate	gamma-glutamylglutamate	glycylleucine	2-hydroxypalmitate	guanosine-2',3'-cyclic monophosphate
	N6-acetyllysine	cytidine 5'-monophosphate (5'-CMP)	thiamin (Vitamin B1)		phenylpyruvate	7-methylguanosine					cytidine	gamma-glutamylmethionine	indoleacetate	2-hydroxystearate	homoserine
	N-formylphenylalanine	flavin adenine dinucleotide (FAD)			sphinganine	adenine					cytosine	glucose 6-phosphate	linoleate (18:2n6)	2'-O-methyladenosine	mesaconate (methylfumarate)
	N-methylproline	glutathione, oxidized (GSSG)			sulfate	adenosine 5'-monophosphate (AMP)					dimethylarginine (SDMA + ADMA)	glutaminylleucine	maltose	2-palmitoylglycerol (16:0)	N-acetylleucine
	phosphoethanolamine	glutathione, reduced (GSH)			vanillate	alanine					dodecanedioate	guanine	N-acetylmethionine	3-aminoisobutyrate	ribulose/xylulose 5-phosphate
	pipecolate	guanosine				arabonate					ectoine	inositol 1-phosphate (I1P)	phytosphingosine	3-hydroxy-2-ethylpropionate	uridine 3'-monophosphate (3'-UMP)
	proline	guanosine 5'- monophosphate (5'-GMP)				betaine					fucosterol	isocitrate	pyridoxate	3-hydroxyisobutyrate
	raffinose	homocitrulline				choline					galactarate (mucic acid)	kynurenate	spermidine	4-acetamidobutanoate
	riboflavin (Vitamin B2)	inosine 5'-monophosphate (IMP)				cysteine-glutathione disulfide					gamma-glutamylthreonine	lactate	UDP-galactose	4-hydroxy-nonenal-glutathione
	saccharopine	malonate				deoxycarnitine					glycerol 3-phosphate	leucylglycine	uridine 5'-monophosphate (UMP)	allo-isoleucine
	S-carboxymethyl-L-cysteine	methylsuccinate				ethanolamine					glycerophosphoglycerol	mannitol	valylglycine	allo-threonine
	shikimate	N-acetyl-beta-alanine				flavin mononucleotide (FMN)					gulonic acid	methylphosphate	xylose	arachidate (20:0)
	S-methylglutathione	N-acetylproline				galactinol					homocysteine	N1-methyladenosine		coniferyl aldehyde
	sucrose	N-acetylserine				gamma-glutamylleucine					itaconate (methylenesuccinate)	N1-methylguanosine		cysteine
	taurine	nicotinamide adenine dinucleotide (NAD+)				hydroquinone beta-D-glucopyranoside					maltol	N2-methylguanosine		eicosenoate (20:1)
	threonate	nicotinate ribonucleoside				linolenate [alpha or gamma; (18:3n3 or 6)]					mevalonate	N6-carbamoylthreonyladenosine		erythrose
	xanthosine	N-methylpipecolate				lysine					mevalonolactone	N6-methyladenosine		ethylmalonate
		pimelate (heptanedioate)				N-acetylarginine					N-acetylaspartate (NAA)	N6-succinyladenosine		galactose 1-phosphate
		pyridoxal				N-monomethylarginine					nicotinamide riboside	N-acetylalanine		gamma-glutamylglycine
		sphingosine				oxalate (ethanedioate)					N-methylglutamate	N-delta-acetylornithine		glucoheptose
		succinate				putrescine					N-methylleucine	ophthalmate		glycerol
		thymidine				pyroglutamine					N-methylphenylalanine	pseudouridine		heptanoate (7:0)
		trigonelline (N'-methylnicotinate)				ribose					norvaline	pyridoxine (Vitamin B6)		leucylglutamine
		tryptamine				S-adenosylhomocysteine (SAH)					O-acetylserine	suberate (octanedioate)		leucylphenylalanine/isoleucylphenylalanine
		tyramine				stachydrine					oleate (18:1n9)			levulinate (4-oxovalerate)
		UDP-N-acetylglucosamine				thymidine 5'-monophosphate					O-methyl tyrosine			maltotriose
		uridine				UDP-N-acetylgalactosamine					phenylalanylalanine			N6-carboxyethyllysine
						uracil					ribonate			N6-carboxymethyllysine
											ribose 1-phosphate			N-6-trimethyllysine
											ribose 5-phosphate			N-acetylthreonine
											succinimide			nicotinamide
											sucrose-6-phosphate			nicotinamide ribonucleotide (NMN)
											trans-aconitate			norophthalmate
											urate			ornithine
											xylitol			palmitate (16:0)
											xylulose			phenyllactate (PLA)
														phosphopantetheine
														ribulose
														S-methylmethionine
														threonine
														threonylphenylalanine
														thymidine 3'-monophosphate
